# Supplementary material for: Stacked homodimers of substituted contorted hexabenzocoronenes and their complexes with C60 fullerene
Source: Royal Society of Chemistry journal article supplement (doi:10.1039/c7ob01333g), 2017-01-01
Supplement: c7ob01333g1.pdf [file c7ob01333g1.pdf]

## Supporting Information

### Stacked Homodimers of Substituted Contorted Hexabenzocoronenes and Their Complexes with C<sub>60</sub> Fullerene

Diana Sepúlveda,<sup>a</sup> Yanfei Guan,<sup>a</sup> Ulises Rangel,<sup>a</sup> and Steven E. Wheeler<sup>a,b</sup>

<sup>a</sup>Department of Chemistry, Texas A&M University, College Station, TX, 77843 (USA)

<sup>b</sup>Center for Computational Quantum Chemistry, Department of Chemistry, University of Georgia, Athens, GA 30602 (USA)

#### Contents

|                                                                                                                                                                                                                                                                                        | page |
|----------------------------------------------------------------------------------------------------------------------------------------------------------------------------------------------------------------------------------------------------------------------------------------|------|
| <b>Table S1.</b> B97-D/TZV(2d,2p) electronic energies (in Hartrees) and interaction energies (in kcal mol <sup>-1</sup> ) for model stacked dimers of C <sub>6</sub> H <sub>5</sub> X with benzene and a hexagonal face of C <sub>60</sub> , along with relative interaction energies. | S2   |
| <b>Table S2.</b> B97-D3M(BJ)/TZVPP <sup>a</sup> electronic energies (in Hartrees) for complexes of C <sub>60</sub> with c-HBC as function of rotations of C <sub>60</sub> about the X, Y, and Z-axes.                                                                                  | S3   |
| <b>Table S3.</b> B97-D3M(BJ)/TZVPP electronic energies for c-HBC monomer, c-HBC...c-HBC homodimer, and c-HBC...C <sub>60</sub> heterodimer as a function of bowl depth of c-HBC.                                                                                                       | S4   |
| <b>Table S4.</b> B97-D3M(BJ)/TZVPP electronic energies (Hartree) for optimized substituted c-HBCs as well as homodimers c-HBC...c-HBC and heterodimers c-HBC...C <sub>60</sub> .                                                                                                       | S5   |
| <b>Optimized Cartesian Coordinates</b>                                                                                                                                                                                                                                                 | S6   |

**Table S1.** B97-D/TZV(2d,2p) electronic energies (in Hartrees) and interaction energies (in kcal mol<sup>-1</sup>) for model stacked dimers of C<sub>6</sub>H<sub>5</sub>X with benzene and a hexagonal face of C<sub>60</sub>, along with relative interaction energies.

| X      | C <sub>6</sub> H <sub>5</sub> X monomer | C <sub>6</sub> H <sub>5</sub> X··C <sub>60</sub> |                  | C <sub>6</sub> H <sub>5</sub> X··C <sub>6</sub> H <sub>6</sub> <sup>a</sup> |                  |                               |
|--------|-----------------------------------------|--------------------------------------------------|------------------|-----------------------------------------------------------------------------|------------------|-------------------------------|
|        |                                         | Dimer                                            | E <sub>int</sub> | E <sub>rel</sub> <sup>b</sup>                                               | E <sub>int</sub> | E <sub>rel</sub> <sup>b</sup> |
| H      | -232.1495                               | -2517.2249                                       | -4.7             | 0.0                                                                         | -1.8             | 0.0                           |
| BF2    | -456.2017                               | -2741.2783                                       | -5.4             | -0.7                                                                        | -2.8             | -1.0                          |
| CCH    | -308.2631                               | -2593.3396                                       | -5.4             | -0.7                                                                        | -2.6             | -0.8                          |
| CF3    | -569.1658                               | -2854.2425                                       | -5.5             | -0.8                                                                        | -3.3             | -1.5                          |
| CH2OH  | -346.6513                               | -2631.7288                                       | -6.0             | -1.3                                                                        | -2.5             | -0.7                          |
| CH3    | -271.4524                               | -2556.5294                                       | -5.7             | -1.0                                                                        | -2.4             | -0.6                          |
| CHO    | -345.4480                               | -2630.5245                                       | -5.4             | -0.7                                                                        | -2.9             | -1.1                          |
| CN     | -324.3587                               | -2609.4348                                       | -5.2             | -0.5                                                                        | -3.1             | -1.3                          |
| COCH3  | -384.7552                               | -2669.8327                                       | -6.0             | -1.3                                                                        | -3.0             | -1.2                          |
| COOCH3 | -459.9754                               | -2745.0528                                       | -6.0             | -1.3                                                                        | -2.9             | -1.1                          |
| COOH   | -420.6913                               | -2705.7681                                       | -5.6             | -0.9                                                                        | -2.9             | -1.1                          |
| F      | -331.3828                               | -2616.4586                                       | -5.0             | -0.3                                                                        | -2.4             | -0.6                          |
| NH2    | -287.4955                               | -2572.5726                                       | -5.8             | -1.1                                                                        | -2.1             | -0.3                          |
| NHCH3  | -326.7851                               | -2611.8636                                       | -6.6             | -1.9                                                                        | -2.4             | -0.6                          |
| NHOH   | -362.6473                               | -2647.7246                                       | -5.9             | -1.2                                                                        | -2.5             | -0.7                          |
| NO     | -361.4164                               | -2646.4927                                       | -5.3             | -0.6                                                                        | -3.1             | -1.3                          |
| NO2    | -436.6239                               | -2721.7005                                       | -5.4             | -0.7                                                                        | -3.4             | -1.6                          |
| OCF3   | -644.3709                               | -2929.4485                                       | -6.1             | -1.4                                                                        | -3.1             | -1.3                          |
| OH     | -307.3632                               | -2592.4397                                       | -5.4             | -0.7                                                                        | -2.1             | -0.3                          |
| OMe    | -346.6473                               | -2631.7247                                       | -5.9             | -1.2                                                                        | -2.4             | -0.6                          |
| SCH3   | -669.6594                               | -2954.7376                                       | -6.4             | -1.8                                                                        | -2.7             | -0.9                          |
| SH     | -630.3612                               | -2915.4380                                       | -5.6             | -0.9                                                                        | -2.5             | -0.7                          |
| SiF3   | -820.7608                               | -3105.8388                                       | -6.3             | -1.6                                                                        | -3.5             | -1.7                          |
| SiH3   | -522.8380                               | -2807.9149                                       | -5.7             | -1.0                                                                        | -2.6             | -0.8                          |

a. Data from S. E. Wheeler, *J. Am. Chem. Soc.*, 2011, **133**, 10262-10274.

b. Energies relative to X = H.

**Table S2.** B97-D3M(BJ)/TZVPP<sup>a</sup> electronic energies (in Hartrees) for complexes of C<sub>60</sub> with c-HBC as function of rotations of C<sub>60</sub> about the X, Y, and Z-axes.

| Degree(°) | X          | Y          | Z          |
|-----------|------------|------------|------------|
| 0         | -4129.1395 | -4129.1395 | -4129.1395 |
| 10        | -4129.1384 | -4129.1385 | -4129.1393 |
| 20        | -4129.1396 | -4129.1391 | -4129.1383 |
| 30        | -4129.1390 | -4129.1399 | -4129.1373 |
| 40        | -4129.1388 | -4129.1401 | -4129.1372 |
| 50        | -4129.1385 | -4129.1399 | -4129.1384 |
| 60        | -4129.1399 | -4129.1391 | -4129.1387 |
| 70        | -4129.1400 | -4129.1390 | -4129.1380 |
| 80        | -4129.1385 | -4129.1394 | -4129.1376 |
| 90        | -4129.1397 | -4129.1397 | -4129.1377 |
| 100       | -4129.1387 | -4129.1393 | -4129.1381 |
| 110       | -4129.1398 | -4129.1388 | -4129.1388 |
| 120       | -4129.1373 | -4129.1394 | -4129.1396 |
| 130       | -4129.1377 | -4129.1393 | -4129.1392 |
| 140       | -4129.1388 | -4129.1389 | -4129.1381 |
| 150       | -4129.1381 | -4129.1392 | -4129.1373 |
| 160       | -4129.1392 | -4129.1395 | -4129.1375 |
| 170       | -4129.1383 | -4129.1385 | -4129.1385 |
| 180       | -4129.1395 | -4129.1389 | -4129.1389 |
| 190       | -4129.1384 | -4129.1386 | -4129.1386 |
| 200       | -4129.1396 | -4129.1396 | -4129.1376 |
| 210       | -4129.1390 | -4129.1392 | -4129.1373 |
| 220       | -4129.1388 | -4129.1389 | -4129.1380 |
| 230       | -4129.1385 | -4129.1393 | -4129.1390 |
| 240       | -4129.1399 | -4129.1394 | -4129.1394 |
| 250       | -4129.1400 | -4129.1388 | -4129.1387 |
| 260       | -4129.1385 | -4129.1393 | -4129.1383 |
| 270       | -4129.1397 | -4129.1397 | -4129.1377 |
| 280       | -4129.1387 | -4129.1394 | -4129.1374 |
| 290       | -4129.1399 | -4129.1390 | -4129.1382 |
| 300       | -4129.1373 | -4129.1391 | -4129.1389 |
| 310       | -4129.1377 | -4129.1399 | -4129.1385 |
| 320       | -4129.1388 | -4129.1402 | -4129.1373 |
| 330       | -4129.1381 | -4129.1399 | -4129.1373 |
| 340       | -4129.1392 | -4129.1391 | -4129.1382 |
| 350       | -4129.1383 | -4129.1384 | -4129.1392 |

a: three-body interaction included in the D3 dispersion correction with D3M(BJ), i.e., Becke-Johnson damping with the refitted parameters by Sherrill and coworkers.

**Table S3.** B97-D3M(BJ)/TZVPP electronic energies for c-HBC monomer, c-HBC...c-HBC homodimer, and c-HBC...C<sub>60</sub> heterodimer as a function of bowl depth of c-HBC.

| Bowl Depth(Å) | Monomer E(Hartree) | c-HBC...c-HBC separation(Å) | c-HBC Homodimer E(Hartree) | c-HBC...C <sub>60</sub> seperation(Å) | Heterodimer E(Hartree) |
|---------------|--------------------|-----------------------------|----------------------------|---------------------------------------|------------------------|
| 0.00          | -1843.1202         | 3.62                        | -3686.2879                 | 3.17                                  | -4128.8872             |
| 0.10          | -1843.1274         | 3.62                        | -3686.3027                 | 3.17                                  | -4128.8944             |
| 0.19          | -1843.1476         | 3.62                        | -3686.3443                 | 3.17                                  | -4128.9148             |
| 0.29          | -1843.1791         | 3.62                        | -3686.4092                 | 3.16                                  | -4128.9466             |
| 0.39          | -1843.2185         | 3.61                        | -3686.4907                 | 3.15                                  | -4128.9865             |
| 0.49          | -1843.2609         | 3.60                        | -3686.5787                 | 3.15                                  | -4129.0297             |
| 0.58          | -1843.3004         | 3.60                        | -3686.6608                 | 3.15                                  | -4129.0701             |
| 0.68          | -1843.3322         | 3.65                        | -3686.7252                 | 3.14                                  | -4129.1028             |
| 0.78          | -1843.3536         | 3.78                        | -3686.7661                 | 3.13                                  | -4129.1251             |
| 0.88          | -1843.3644         | 3.95                        | -3686.7819                 | 3.13                                  | -4129.1369             |
| 0.97          | -1843.3662         | 4.23                        | -3686.7780                 | 3.12                                  | -4129.1398             |
| 1.07          | -1843.3602         | 4.47                        | -3686.7591                 | 3.12                                  | -4129.1349             |
| 1.17          | -1843.3482         | 4.75                        | -3686.7304                 | 3.12                                  | -4129.1242             |
| 1.26          | -1843.3315         | 5.02                        | -3686.6926                 | 3.13                                  | -4129.1085             |
| 1.36          | -1843.3108         | 5.31                        | -3686.6482                 | 3.15                                  | -4129.0887             |
| 1.46          | -1843.2864         | 5.60                        | -3686.5967                 | 3.19                                  | -4129.0646             |
| 1.56          | -1843.2581         | 5.91                        | -3686.5371                 | 3.25                                  | -4129.0359             |
| 1.65          | -1843.2256         | 6.28                        | -3686.4693                 | 3.42                                  | -4129.0023             |
| 1.75          | -1843.1885         | 6.73                        | -3686.3927                 | 3.60                                  | -4128.9634             |
| 1.85          | -1843.1460         | 7.20                        | -3686.3061                 | 3.74                                  | -4128.9179             |

**Table S4.** B97-D3M(BJ)/TZVPP electronic energies (Hartree) for optimized substituted c-HBCs as well as homodimers c-HBC<sup>••</sup>c-HBC and heterodimers c-HBC<sup>••</sup>C<sub>60</sub>.

| Substituent      | Monomers   | c-HBC <sup>••</sup> c-HBC<br>Homodimers | c-HBC <sup>••</sup> C <sub>60</sub><br>Heterodimers |
|------------------|------------|-----------------------------------------|-----------------------------------------------------|
| SCH <sub>3</sub> | -7093.8601 | -14187.8304                             | -9379.6686                                          |
| NH <sub>2</sub>  | -2507.5979 | -5015.2966                              | -4793.3850                                          |
| OCH <sub>3</sub> | -3217.4567 | -6434.9944                              | -5503.2418                                          |
| CH <sub>3</sub>  | -2315.1206 | -4630.3207                              | -4600.9033                                          |
| CN               | -2949.9593 | -5899.9771                              | -5235.7414                                          |
| SH               | -6622.1562 | -13244.4332                             | -8907.9385                                          |
| C≡CH             | -2756.9017 | -5513.8981                              | -5042.6813                                          |
| OH               | -2745.9977 | -5492.0820                              | -5031.7785                                          |
| F                | -3034.1408 | -8449.6042                              | -5319.9179                                          |
| H                | -1843.3662 | -3686.7858                              | -4129.1434                                          |
| F <sub>24</sub>  | -4224.7909 | -6068.3431                              | -6510.5729                                          |
| C <sub>60</sub>  | -2285.7448 |                                         |                                                     |

## Optimized Cartesian Coordinates

### Optimized substituted c-HBC monomers, homodimers and c-HBC...C60 heterodimers

96

CCH substituted monomer

|   |           |           |           |
|---|-----------|-----------|-----------|
| C | 0.717050  | 3.654808  | -0.421706 |
| C | -0.717060 | 3.654808  | -0.421679 |
| C | -1.424208 | 2.466894  | 0.000136  |
| C | -2.806705 | 2.448233  | 0.421717  |
| C | -3.523684 | 1.206234  | 0.421916  |
| C | -2.848411 | -0.000001 | 0.000031  |
| C | -3.523689 | -1.206229 | -0.421862 |
| C | -2.806709 | -2.448229 | -0.421692 |
| C | -1.424210 | -2.466896 | -0.000106 |
| C | -0.717050 | -3.654808 | 0.421706  |
| C | 0.717060  | -3.654808 | 0.421679  |
| C | 1.424208  | -2.466894 | -0.000136 |
| C | 2.806705  | -2.448233 | -0.421717 |
| C | 3.523684  | -1.206234 | -0.421916 |
| C | 2.848411  | 0.000001  | -0.000031 |
| C | 3.523689  | 1.206229  | 0.421862  |
| C | 2.806709  | 2.448229  | 0.421692  |
| C | 1.424210  | 2.466896  | 0.000106  |
| C | 0.719012  | 1.245374  | 0.000343  |
| C | -0.719010 | 1.245372  | 0.000359  |
| C | -1.437966 | 0.000000  | 0.000017  |
| C | -0.719012 | -1.245374 | -0.000343 |
| C | 0.719010  | -1.245372 | -0.000359 |
| C | 1.437966  | 0.000000  | -0.000017 |
| C | 3.437286  | 3.588191  | 0.964027  |
| C | 4.736170  | 3.561668  | 1.467515  |
| C | 5.452984  | 2.319603  | 1.467947  |
| C | 4.826249  | 1.181771  | 0.964222  |
| C | -1.389156 | 4.770773  | -0.964000 |
| C | -0.717042 | 5.882284  | -1.468005 |
| C | 0.716975  | 5.882276  | -1.468054 |
| C | 1.389115  | 4.770765  | -0.964083 |
| C | -4.826245 | 1.181793  | 0.964274  |
| C | -5.452981 | 2.319641  | 1.467961  |
| C | -4.736173 | 3.561711  | 1.467478  |
| C | -3.437288 | 3.588218  | 0.963992  |
| C | -3.437286 | -3.588191 | -0.964027 |
| C | -4.736170 | -3.561668 | -1.467515 |
| C | -5.452984 | -2.319603 | -1.467947 |

|   |           |           |           |
|---|-----------|-----------|-----------|
| C | -4.826249 | -1.181771 | -0.964222 |
| C | 1.389156  | -4.770773 | 0.964000  |
| C | 0.717042  | -5.882284 | 1.468005  |
| C | -0.716975 | -5.882276 | 1.468054  |
| C | -1.389115 | -4.770765 | 0.964083  |
| C | 4.826245  | -1.181793 | -0.964274 |
| C | 5.452981  | -2.319641 | -1.467961 |
| C | 4.736173  | -3.561711 | -1.467478 |
| C | 3.437288  | -3.588218 | -0.963992 |
| H | 2.882259  | 4.513663  | 1.050316  |
| H | 5.349868  | 0.238200  | 1.049992  |
| H | -2.468146 | 4.752562  | -1.049827 |
| H | 2.468098  | 4.752550  | -1.049988 |
| H | -5.349867 | 0.238225  | 1.050069  |
| H | -2.882266 | 4.513699  | 1.050225  |
| H | -2.882259 | -4.513663 | -1.050316 |
| H | -5.349868 | -0.238200 | -1.049992 |
| H | 2.468146  | -4.752562 | 1.049827  |
| H | -2.468098 | -4.752550 | 1.049988  |
| H | 5.349867  | -0.238225 | -1.050069 |
| H | 2.882266  | -4.513699 | -1.050225 |
| C | -1.456551 | 6.969255  | -2.012283 |
| C | 1.456457  | 6.969241  | -2.012384 |
| C | 5.308335  | 4.745614  | 2.011165  |
| C | 6.763913  | 2.222357  | 2.012635  |
| C | 6.763913  | -2.222415 | -2.012645 |
| C | 5.308348  | -4.745679 | -2.011070 |
| C | 1.456551  | -6.969255 | 2.012283  |
| C | -1.456457 | -6.969241 | 2.012384  |
| C | -5.308335 | -4.745614 | -2.011165 |
| C | -6.763913 | -2.222357 | -2.012635 |
| C | -6.763913 | 2.222415  | 2.012645  |
| C | -5.308348 | 4.745679  | 2.011070  |
| C | 5.786544  | 5.761140  | 2.466747  |
| C | 7.882056  | 2.127458  | 2.468995  |
| C | 7.882058  | -2.127533 | -2.469003 |
| C | 5.786565  | -5.761224 | -2.466601 |
| C | 2.097519  | -7.890435 | 2.468397  |
| C | -2.097399 | -7.890416 | 2.468544  |
| C | -5.786544 | -5.761140 | -2.466747 |
| C | -7.882056 | -2.127458 | -2.468995 |
| C | -7.882058 | 2.127533  | 2.469003  |
| C | -5.786565 | 5.761224  | 2.466601  |
| C | -2.097519 | 7.890435  | -2.468397 |
| C | 2.097399  | 7.890416  | -2.468544 |

|                         |           |           |           |   |           |           |           |
|-------------------------|-----------|-----------|-----------|---|-----------|-----------|-----------|
| H                       | -2.656462 | 8.704788  | -2.871330 | C | -2.467466 | 1.424592  | 0.000338  |
| H                       | 2.656289  | 8.704781  | -2.871526 | C | -4.783623 | 1.380821  | -0.957255 |
| H                       | 6.212433  | 6.652425  | 2.869469  | C | -5.887064 | -0.709957 | -1.460719 |
| H                       | 8.866313  | 2.049835  | 2.872935  | H | -4.759873 | -2.461435 | -1.042115 |
| H                       | 8.866319  | -2.049929 | -2.872939 | C | 1.246116  | 0.719452  | 0.000014  |
| H                       | 6.212458  | -6.652527 | -2.869278 | C | 2.467466  | -1.424592 | -0.000338 |
| H                       | 2.656462  | -8.704788 | 2.871330  | C | 3.587205  | -3.452345 | -0.958562 |
| H                       | -2.656289 | -8.704781 | 2.871526  | C | 2.328140  | -5.453617 | -1.460141 |
| H                       | -6.212433 | -6.652425 | -2.869469 | H | 0.248216  | -5.353619 | -1.040187 |
| H                       | -8.866313 | -2.049835 | -2.872935 | C | 0.000000  | 2.849185  | -0.000338 |
| H                       | -8.866319 | 2.049929  | 2.872939  | C | -2.447853 | 2.809476  | 0.416120  |
| H                       | -6.212458 | 6.652527  | 2.869278  | C | -5.887041 | 0.710580  | -1.460141 |
|                         |           |           |           | H | -4.760478 | 2.461848  | -1.040187 |
|                         |           |           |           | C | -7.046152 | -1.477022 | -2.048114 |
|                         |           |           |           | C | 2.467466  | 1.424592  | 0.000338  |
|                         |           |           |           | C | 3.657070  | -0.715171 | 0.415434  |
|                         |           |           |           | C | 3.558373  | -4.743369 | -1.460719 |
|                         |           |           |           | H | 4.511602  | -2.891453 | -1.042115 |
|                         |           |           |           | C | 2.242296  | -6.841417 | -2.046691 |
|                         |           |           |           | C | -1.209179 | 3.524701  | 0.415434  |
|                         |           |           |           | C | 1.209151  | 3.524640  | -0.416120 |
|                         |           |           |           | C | -3.587205 | 3.452345  | 0.958562  |
|                         |           |           |           | C | -7.045989 | 1.478824  | -2.046691 |
|                         |           |           |           | H | -6.873664 | -2.556500 | -1.986622 |
|                         |           |           |           | H | -7.206076 | -1.211765 | -3.102280 |
|                         |           |           |           | H | -7.982134 | -1.245835 | -1.521011 |
|                         |           |           |           | C | 3.657004  | 0.715165  | 0.416120  |
|                         |           |           |           | C | 2.447891  | 2.809530  | -0.415434 |
|                         |           |           |           | C | 4.783623  | -1.380821 | 0.957255  |
|                         |           |           |           | C | 4.802215  | -5.363635 | -2.048114 |
|                         |           |           |           | H | 1.219283  | -7.227803 | -1.991684 |
|                         |           |           |           | H | 2.904061  | -7.538473 | -1.514007 |
|                         |           |           |           | H | 2.559558  | -6.849833 | -3.098555 |
|                         |           |           |           | C | -1.195986 | 4.833149  | 0.957255  |
|                         |           |           |           | C | 1.196216  | 4.832784  | -0.958562 |
|                         |           |           |           | C | -3.558373 | 4.743369  | 1.460719  |
|                         |           |           |           | H | -4.511602 | 2.891453  | 1.042115  |
|                         |           |           |           | H | -6.869102 | 2.557971  | -1.991684 |
|                         |           |           |           | H | -7.980540 | 1.254246  | -1.514007 |
|                         |           |           |           | H | -7.211909 | 1.208275  | -3.098555 |
|                         |           |           |           | C | 4.783421  | 1.380439  | 0.958562  |
|                         |           |           |           | C | 3.587637  | 3.452329  | -0.957255 |
|                         |           |           |           | C | 5.887041  | -0.710580 | 1.460141  |
|                         |           |           |           | H | 4.760478  | -2.461848 | 1.040187  |
|                         |           |           |           | H | 5.650826  | -4.674518 | -1.986622 |
| 108                     |           |           |           |   |           |           |           |
| CH3 substituted monomer |           |           |           |   |           |           |           |
| C                       | -4.803694 | -5.362594 | 2.046691  |   |           |           |           |
| C                       | -3.558901 | -4.743037 | 1.460141  |   |           |           |           |
| H                       | -5.649819 | -4.669831 | 1.991684  |   |           |           |           |
| H                       | -4.652351 | -5.641559 | 3.098555  |   |           |           |           |
| H                       | -5.076478 | -6.284228 | 1.514007  |   |           |           |           |
| C                       | -2.328691 | -5.453325 | 1.460719  |   |           |           |           |
| C                       | -3.587637 | -3.452329 | 0.957255  |   |           |           |           |
| C                       | -2.243937 | -6.840658 | 2.048114  |   |           |           |           |
| C                       | -1.196216 | -4.832784 | 0.958562  |   |           |           |           |
| C                       | -2.447891 | -2.809530 | 0.415434  |   |           |           |           |
| H                       | -4.512262 | -2.891771 | 1.040187  |   |           |           |           |
| H                       | -1.222838 | -7.231018 | 1.986622  |   |           |           |           |
| H                       | -2.912142 | -7.535649 | 1.521011  |   |           |           |           |
| H                       | -2.553619 | -6.846527 | 3.102280  |   |           |           |           |
| C                       | -1.209151 | -3.524640 | 0.416120  |   |           |           |           |
| H                       | -0.248271 | -5.352889 | 1.042115  |   |           |           |           |
| C                       | -2.467466 | -1.424592 | -0.000338 |   |           |           |           |
| C                       | 0.000000  | -2.849185 | 0.000338  |   |           |           |           |
| C                       | -1.246116 | -0.719452 | -0.000014 |   |           |           |           |
| C                       | -3.657004 | -0.715165 | -0.416120 |   |           |           |           |
| C                       | 0.000005  | -1.438894 | 0.000014  |   |           |           |           |
| C                       | 1.209179  | -3.524701 | -0.415434 |   |           |           |           |
| C                       | -1.246122 | 0.719443  | 0.000014  |   |           |           |           |
| C                       | -3.657070 | 0.715171  | -0.415434 |   |           |           |           |
| C                       | -4.783421 | -1.380439 | -0.958562 |   |           |           |           |
| C                       | 1.246122  | -0.719443 | -0.000014 |   |           |           |           |
| C                       | 2.447853  | -2.809476 | -0.416120 |   |           |           |           |
| C                       | 1.195986  | -4.833149 | -0.957255 |   |           |           |           |
| C                       | -0.000005 | 1.438894  | -0.000014 |   |           |           |           |

|                        |           |           |           |   |           |           |           |
|------------------------|-----------|-----------|-----------|---|-----------|-----------|-----------|
| H                      | 4.652457  | -5.634763 | -3.102280 | C | 1.423573  | -2.465780 | -0.000078 |
| H                      | 5.069992  | -6.289813 | -1.521011 | C | -2.804939 | -2.447017 | -0.424535 |
| C                      | -2.328140 | 5.453617  | 1.460141  | C | -0.716870 | -3.652693 | 0.424615  |
| H                      | -0.248216 | 5.353619  | 1.040187  | C | 0.718846  | 1.245057  | 0.000275  |
| C                      | 2.328691  | 5.453325  | -1.460719 | C | -1.423573 | 2.465780  | 0.000078  |
| H                      | 0.248271  | 5.352889  | -1.042115 | C | -3.521815 | -1.205354 | -0.424739 |
| C                      | -4.802215 | 5.363635  | 2.048114  | C | -3.521808 | 1.205360  | 0.424844  |
| C                      | 5.887064  | 0.709957  | 1.460719  | C | 2.847202  | 0.000002  | -0.000061 |
| H                      | 4.759873  | 2.461435  | 1.042115  | C | 0.716886  | -3.652691 | 0.424568  |
| C                      | 3.558901  | 4.743037  | -1.460141 | C | 2.804934  | -2.447025 | -0.424579 |
| H                      | 4.512262  | 2.891771  | -1.040187 | C | -3.428283 | -3.588268 | -0.974386 |
| C                      | 7.045989  | -1.478824 | 2.046691  | C | -1.393550 | -4.763173 | 0.974361  |
| C                      | -2.242296 | 6.841417  | 2.046691  | C | 1.423576  | 2.465785  | 0.000025  |
| C                      | 2.243937  | 6.840658  | -2.048114 | C | -2.804934 | 2.447025  | 0.424579  |
| H                      | -5.650826 | 4.674518  | 1.986622  | C | -0.716886 | 3.652691  | -0.424568 |
| H                      | -5.069992 | 6.289813  | 1.521011  | C | -4.821892 | -1.174225 | -0.974622 |
| H                      | -4.652457 | 5.634763  | 3.102280  | C | -4.821890 | 1.174264  | 0.974719  |
| C                      | 7.046152  | 1.477022  | 2.048114  | C | 3.521808  | -1.205360 | -0.424844 |
| C                      | 4.803694  | 5.362594  | -2.046691 | C | 3.521815  | 1.205354  | 0.424739  |
| H                      | 6.869102  | -2.557971 | 1.991684  | C | 1.393622  | -4.763176 | 0.974225  |
| H                      | 7.211909  | -1.208275 | 3.098555  | C | 3.428295  | -3.588320 | -0.974309 |
| H                      | 7.980540  | -1.254246 | 1.514007  | C | -4.720035 | -3.548539 | -1.486721 |
| H                      | -1.219283 | 7.227803  | 1.991684  | H | -2.874778 | -4.514492 | -1.062200 |
| H                      | -2.559558 | 6.849833  | 3.098555  | C | -0.713464 | -5.861943 | 1.486994  |
| H                      | -2.904061 | 7.538473  | 1.514007  | H | -2.472417 | -4.746727 | 1.061825  |
| H                      | 1.222838  | 7.231018  | -1.986622 | C | 0.716870  | 3.652693  | -0.424615 |
| H                      | 2.553619  | 6.846527  | -3.102280 | C | 2.804939  | 2.447017  | 0.424535  |
| H                      | 2.912142  | 7.535649  | -1.521011 | C | -3.428295 | 3.588320  | 0.974309  |
| H                      | 6.873664  | 2.556500  | 1.986622  | C | -1.393622 | 4.763176  | -0.974225 |
| H                      | 7.982134  | 1.245835  | 1.521011  | C | -5.433508 | -2.312615 | -1.487061 |
| H                      | 7.206076  | 1.211765  | 3.102280  | H | -5.346983 | -0.231649 | -1.062039 |
| H                      | 5.649819  | 4.669831  | -1.991684 | C | -5.433510 | 2.312687  | 1.487083  |
| H                      | 5.076478  | 6.284228  | -1.514007 | H | -5.346985 | 0.231696  | 1.062185  |
| H                      | 4.652351  | 5.641559  | -3.098555 | C | 4.821890  | -1.174264 | -0.974719 |
|                        |           |           |           | C | 4.821892  | 1.174225  | 0.974622  |
|                        |           |           |           | C | 0.713586  | -5.861950 | 1.486915  |
|                        |           |           |           | H | 2.472501  | -4.746726 | 1.061560  |
|                        |           |           |           | C | 4.720050  | -3.548620 | -1.486641 |
|                        |           |           |           | H | 2.874805  | -4.514565 | -1.062013 |
|                        |           |           |           | C | -5.286907 | -4.732984 | -2.051886 |
|                        |           |           |           | C | -1.455902 | -6.944744 | 2.052613  |
|                        |           |           |           | C | 1.393550  | 4.763173  | -0.974361 |
|                        |           |           |           | C | 3.428283  | 3.588268  | 0.974386  |
|                        |           |           |           | C | -4.720050 | 3.548620  | 1.486641  |
|                        |           |           |           | H | -2.874805 | 4.514565  | 1.062013  |
| 84                     |           |           |           |   |           |           |           |
| CN substituted monomer |           |           |           |   |           |           |           |
| C                      | -0.718846 | -1.245057 | -0.000275 |   |           |           |           |
| C                      | -1.437654 | -0.000001 | 0.000029  |   |           |           |           |
| C                      | 0.718843  | -1.245053 | -0.000303 |   |           |           |           |
| C                      | -1.423576 | -2.465785 | -0.000025 |   |           |           |           |
| C                      | -0.718843 | 1.245053  | 0.000303  |   |           |           |           |
| C                      | -2.847202 | -0.000002 | 0.000061  |   |           |           |           |
| C                      | 1.437654  | 0.000001  | -0.000029 |   |           |           |           |



|                       |           |           |           |   |           |           |           |
|-----------------------|-----------|-----------|-----------|---|-----------|-----------|-----------|
| C                     | -0.713586 | 5.861950  | -1.486915 | C | -1.700325 | 3.315629  | -0.416398 |
| H                     | -2.472501 | 4.746726  | -1.061560 | C | 1.035821  | -0.998154 | -0.000111 |
| C                     | -6.742362 | -2.210965 | -2.052951 | C | -0.686111 | -2.764355 | -0.000441 |
| C                     | -6.742370 | 2.211073  | 2.052964  | C | -3.721630 | 0.185319  | 0.416590  |
| C                     | 5.433510  | -2.312687 | -1.487083 | C | -3.053491 | -2.135725 | -0.416195 |
| H                     | 5.346985  | -0.231696 | -1.062185 | C | 2.736883  | 0.787899  | -0.000240 |
| C                     | 5.433508  | 2.312615  | 1.487061  | C | -0.322956 | 3.712281  | -0.415918 |
| H                     | 5.346983  | 0.231649  | 1.062039  | C | 2.021413  | 3.130432  | 0.416642  |
| C                     | 1.456073  | -6.944757 | 2.052458  | C | -4.300681 | 2.506144  | 0.953693  |
| C                     | 5.286949  | -4.733108 | -2.051689 | C | -2.663307 | 4.204361  | -0.954863 |
| N                     | -5.727322 | -5.708301 | -2.504987 | C | 2.050907  | -1.976307 | -0.000039 |
| N                     | -2.080467 | -7.813413 | 2.506325  | C | -2.021413 | -3.130432 | -0.416643 |
| C                     | 0.713464  | 5.861943  | -1.486994 | C | 0.322956  | -3.712281 | 0.415918  |
| H                     | 2.472417  | 4.746727  | -1.061825 | C | -4.972990 | -0.204190 | 0.954629  |
| C                     | 4.720035  | 3.548539  | 1.486721  | C | -4.320608 | -2.470958 | -0.953916 |
| H                     | 2.874778  | 4.514492  | 1.062200  | C | 3.053491  | 2.135725  | 0.416195  |
| C                     | -5.286949 | 4.733108  | 2.051689  | C | 3.721630  | -0.185319 | -0.416589 |
| C                     | -1.456073 | 6.944757  | -2.052458 | C | 0.019811  | 4.977501  | -0.953426 |
| N                     | -7.806814 | -2.104272 | -2.506892 | C | 2.310166  | 4.408861  | 0.954575  |
| N                     | -7.806815 | 2.104398  | 2.506926  | C | -5.518488 | 2.094462  | 1.445272  |
| C                     | 6.742370  | -2.211073 | -2.052964 | H | -4.044249 | 3.553535  | 1.051653  |
| C                     | 6.742362  | 2.210965  | 2.052951  | C | -2.297167 | 5.436790  | -1.446025 |
| N                     | 2.080674  | -7.813442 | 2.506091  | H | -3.700245 | 3.908742  | -1.053545 |
| N                     | 5.727379  | -5.708456 | -2.504706 | C | 1.700324  | -3.315629 | 0.416398  |
| C                     | 1.455902  | 6.944744  | -2.052613 | C | 3.376452  | -1.576538 | -0.416282 |
| C                     | 5.286907  | 4.732984  | 2.051886  | C | -2.310165 | -4.408861 | -0.954577 |
| N                     | -5.727379 | 5.708456  | 2.504706  | C | -0.019812 | -4.977501 | 0.953426  |
| N                     | -2.080674 | 7.813442  | -2.506091 | C | -5.857122 | 0.729188  | 1.445817  |
| N                     | 7.806815  | -2.104398 | -2.506926 | H | -5.235847 | -1.249902 | 1.053366  |
| N                     | 7.806814  | 2.104272  | 2.506892  | C | -4.573364 | -3.731345 | -1.445493 |
| N                     | 2.080467  | 7.813413  | -2.506325 | H | -5.099153 | -1.724893 | -1.051980 |
| N                     | 5.727322  | 5.708301  | 2.504987  | C | 4.320609  | 2.470958  | 0.953915  |
|                       |           |           |           | C | 4.972990  | 0.204191  | -0.954628 |
|                       |           |           |           | C | -0.945541 | 5.826227  | -1.445249 |
|                       |           |           |           | H | 1.054992  | 5.279215  | -1.051676 |
|                       |           |           |           | C | 3.560617  | 4.707530  | 1.445837  |
|                       |           |           |           | H | 1.536268  | 5.159738  | 1.052905  |
|                       |           |           |           | F | -6.374116 | 2.987533  | 1.980859  |
|                       |           |           |           | F | -3.221240 | 6.258381  | -1.982316 |
|                       |           |           |           | C | 2.663307  | -4.204362 | 0.954864  |
|                       |           |           |           | C | 4.300682  | -2.506144 | -0.953692 |
|                       |           |           |           | C | -3.560617 | -4.707529 | -1.445838 |
|                       |           |           |           | H | -1.536268 | -5.159737 | -1.052907 |
|                       |           |           |           | C | 0.945540  | -5.826227 | 1.445249  |
|                       |           |           |           | H | -1.054992 | -5.279215 | 1.051676  |
| 72                    |           |           |           |   |           |           |           |
| F substituted monomer |           |           |           |   |           |           |           |
| C                     | -1.035821 | 0.998154  | 0.000111  |   |           |           |           |
| C                     | -1.382282 | -0.397930 | -0.000057 |   |           |           |           |
| C                     | 0.346533  | 1.396195  | 0.000254  |   |           |           |           |
| C                     | -2.050907 | 1.976307  | 0.000039  |   |           |           |           |
| C                     | -0.346533 | -1.396195 | -0.000255 |   |           |           |           |
| C                     | -2.736883 | -0.787899 | 0.000240  |   |           |           |           |
| C                     | 1.382282  | 0.397930  | 0.000057  |   |           |           |           |
| C                     | 0.686111  | 2.764355  | 0.000441  |   |           |           |           |
| C                     | -3.376452 | 1.576538  | 0.416282  |   |           |           |           |

|   |           |           |           |
|---|-----------|-----------|-----------|
| F | -7.030797 | 0.339896  | 1.981977  |
| F | -5.774693 | -4.025514 | -1.981039 |
| C | 4.573364  | 3.731345  | 1.445491  |
| H | 5.099153  | 1.724894  | 1.051979  |
| C | 5.857123  | -0.729188 | -1.445816 |
| H | 5.235847  | 1.249902  | -1.053365 |
| F | -0.599805 | 7.013767  | -1.980748 |
| F | 3.810610  | 5.918725  | 1.981598  |
| C | 2.297166  | -5.436790 | 1.446025  |
| H | 3.700244  | -3.908742 | 1.053545  |
| C | 5.518488  | -2.094463 | -1.445271 |
| H | 4.044249  | -3.553536 | -1.051652 |
| F | -3.810610 | -5.918724 | -1.981600 |
| F | 0.599804  | -7.013767 | 1.980748  |
| F | 5.774694  | 4.025515  | 1.981037  |
| F | 7.030798  | -0.339897 | -1.981975 |
| F | 3.221239  | -6.258381 | 1.982317  |
| F | 6.374117  | -2.987534 | -1.980857 |

72

F24 substituted monomer

|   |           |           |           |
|---|-----------|-----------|-----------|
| C | -0.716492 | -1.241104 | 0.000429  |
| C | -1.432903 | 0.000000  | 0.000005  |
| C | 0.716492  | -1.241103 | 0.000424  |
| C | -1.419970 | -2.459525 | 0.001338  |
| C | -0.716492 | 1.241103  | -0.000424 |
| C | -2.839720 | -0.000001 | 0.000009  |
| C | 1.432903  | 0.000000  | -0.000005 |
| C | 1.419970  | -2.459524 | 0.001329  |
| C | -2.773322 | -2.433287 | -0.507713 |
| C | -0.720499 | -3.618097 | 0.510683  |
| C | 0.716492  | 1.241104  | -0.000429 |
| C | -1.419970 | 2.459524  | -0.001329 |
| C | -3.493625 | -1.185111 | -0.508996 |
| C | -3.493625 | 1.185111  | 0.509009  |
| C | 2.839720  | 0.000001  | -0.000009 |
| C | 0.720503  | -3.618099 | 0.510672  |
| C | 2.773323  | -2.433288 | -0.507716 |
| C | -3.351226 | -3.538277 | -1.170658 |
| C | -1.388568 | -4.671738 | 1.172623  |
| C | 1.419970  | 2.459525  | -0.001338 |
| C | -2.773323 | 2.433288  | 0.507716  |
| C | -0.720503 | 3.618099  | -0.510672 |
| C | -4.738904 | -1.132784 | -1.172846 |

|   |           |           |           |
|---|-----------|-----------|-----------|
| C | -4.738905 | 1.132793  | 1.172859  |
| C | 3.493625  | -1.185111 | -0.509009 |
| C | 3.493625  | 1.185111  | 0.508996  |
| C | 1.388585  | -4.671748 | 1.172583  |
| C | 3.351232  | -3.538290 | -1.170632 |
| C | -4.603881 | -3.468350 | -1.760049 |
| F | -2.660560 | -4.681113 | -1.348926 |
| C | -0.701687 | -5.722838 | 1.759587  |
| F | -2.723685 | -4.644640 | 1.351427  |
| C | 0.720499  | 3.618097  | -0.510683 |
| C | 2.773322  | 2.433287  | 0.507713  |
| C | -3.351232 | 3.538290  | 1.170632  |
| C | -1.388585 | 4.671748  | -1.172583 |
| C | -5.305056 | -2.252722 | -1.761507 |
| F | -5.382530 | 0.037127  | -1.352199 |
| C | -5.305060 | 2.252740  | 1.761501  |
| F | -5.382533 | -0.037115 | 1.352223  |
| C | 4.738905  | -1.132793 | -1.172859 |
| C | 4.738904  | 1.132784  | 1.172846  |
| C | 0.701714  | -5.722845 | 1.759564  |
| F | 2.723709  | -4.644664 | 1.351336  |
| C | 4.603889  | -3.468371 | -1.760021 |
| F | 2.660574  | -4.681137 | -1.348856 |
| F | -5.120600 | -4.526634 | -2.395794 |
| F | -1.359434 | -6.700183 | 2.394520  |
| C | 1.388568  | 4.671738  | -1.172623 |
| C | 3.351226  | 3.538277  | 1.170658  |
| C | -4.603889 | 3.468371  | 1.760021  |
| F | -2.660574 | 4.681137  | 1.348856  |
| C | -0.701714 | 5.722845  | -1.759564 |
| F | -2.723709 | 4.644664  | -1.351336 |
| F | -6.478994 | -2.170909 | -2.398811 |
| F | -6.479001 | 2.170936  | 2.398800  |
| C | 5.305060  | -2.252740 | -1.761501 |
| F | 5.382533  | 0.037115  | -1.352223 |
| C | 5.305056  | 2.252722  | 1.761507  |
| F | 5.382530  | -0.037127 | 1.352199  |
| F | 1.359473  | -6.700197 | 2.394474  |
| F | 5.120617  | -4.526667 | -2.395738 |
| C | 0.701687  | 5.722838  | -1.759587 |
| F | 2.723685  | 4.644640  | -1.351427 |
| C | 4.603881  | 3.468350  | 1.760049  |
| F | 2.660560  | 4.681113  | 1.348926  |
| F | -5.120617 | 4.526667  | 2.395738  |
| F | -1.359473 | 6.700197  | -2.394474 |

|                         |           |           |           |   |           |           |           |
|-------------------------|-----------|-----------|-----------|---|-----------|-----------|-----------|
| F                       | 6.479001  | -2.170936 | -2.398800 | C | 0.677183  | -3.669825 | -0.404339 |
| F                       | 6.478994  | 2.170909  | 2.398811  | C | -3.129830 | -5.062656 | 1.421486  |
| F                       | 1.359434  | 6.700183  | -2.394520 | H | -1.053710 | -5.271869 | 1.027533  |
| F                       | 5.120600  | 4.526634  | 2.395794  | N | -5.481993 | -4.593958 | 1.958679  |
|                         |           |           |           | C | 2.651185  | 1.044989  | 0.007458  |
|                         |           |           |           | C | 1.719643  | 3.310588  | -0.413701 |
|                         |           |           |           | C | -1.511510 | 5.758036  | 1.412710  |
|                         |           |           |           | H | 0.533902  | 5.351849  | 1.013984  |
| 96                      |           |           |           | N | -3.897129 | 5.997716  | 1.952948  |
| NH2 substituted monomer |           |           |           | C | 2.008943  | -3.142992 | -0.394291 |
| N                       | -7.145475 | -0.370727 | -1.966755 | C | 3.513586  | -1.248168 | 0.426056  |
| C                       | -5.934947 | 0.162700  | -1.451480 | C | 0.476566  | -4.964667 | -0.934218 |
| H                       | -7.103951 | -1.382518 | -2.022021 | N | -3.272993 | -6.390784 | 1.850610  |
| H                       | -7.361211 | -0.015051 | -2.894438 | H | -6.138206 | -3.822956 | 2.017325  |
| C                       | -5.742030 | 1.572907  | -1.426858 | H | -5.397590 | -5.003939 | 2.885133  |
| C                       | -4.934461 | -0.659990 | -0.959403 | C | 2.839101  | 2.417626  | -0.401568 |
| N                       | -6.752678 | 2.449217  | -1.850985 | C | 3.724160  | 0.168122  | 0.416339  |
| C                       | -4.535909 | 2.071008  | -0.950746 | C | 1.907144  | 4.606785  | -0.944962 |
| C                       | -3.724199 | -0.168179 | -0.416295 | N | -1.259699 | 7.070815  | 1.839680  |
| H                       | -5.063592 | -1.732680 | -1.066520 | H | -3.698637 | 6.365621  | 2.879604  |
| H                       | -7.488579 | 2.049215  | -2.412707 | H | -4.751735 | 5.454528  | 2.007961  |
| H                       | -6.416056 | 3.323812  | -2.229067 | C | 3.039676  | -3.941816 | -0.942965 |
| C                       | -3.513645 | 1.248117  | -0.426053 | C | 4.535742  | -2.071098 | 0.950890  |
| H                       | -4.366219 | 3.140080  | -1.025225 | C | 1.511577  | -5.757935 | -1.413099 |
| C                       | -2.651182 | -1.045042 | -0.007509 | H | -0.533842 | -5.351866 | -1.014258 |
| C                       | -2.230516 | 1.774931  | -0.015138 | H | -4.075790 | -6.594834 | 2.425960  |
| C                       | -1.337552 | -0.527399 | -0.004282 | H | -2.426657 | -6.805312 | 2.215439  |
| C                       | -2.839055 | -2.417674 | 0.401575  | C | 4.060300  | 2.880258  | -0.945665 |
| C                       | -1.125976 | 0.895489  | -0.006736 | C | 4.934349  | 0.659904  | 0.959624  |
| C                       | -2.008933 | 3.143013  | 0.394090  | C | 3.129999  | 5.062680  | -1.421239 |
| C                       | -0.212555 | -1.424400 | 0.001573  | H | 1.053865  | 5.271923  | -1.027357 |
| C                       | -1.719583 | -3.310620 | 0.413700  | H | -0.327229 | 7.220572  | 2.199442  |
| C                       | -4.060213 | -2.880298 | 0.945762  | H | -1.964395 | 7.497576  | 2.421462  |
| C                       | 0.212552  | 1.424373  | -0.001708 | C | 2.828741  | -5.218798 | -1.437476 |
| C                       | -0.677160 | 3.669812  | 0.404148  | H | 4.031648  | -3.514943 | -1.053737 |
| C                       | -3.039654 | 3.941951  | 0.942624  | C | 5.741811  | -1.573023 | 1.427158  |
| C                       | 1.125961  | -0.895508 | 0.006605  | H | 4.365988  | -3.140169 | 1.025349  |
| C                       | -0.421173 | -2.821137 | 0.004043  | N | 1.259801  | -7.070663 | -1.840197 |
| C                       | -1.907018 | -4.606774 | 0.945098  | C | 4.232459  | 4.162240  | -1.441957 |
| C                       | -4.232311 | -4.162238 | 1.442175  | H | 4.884647  | 2.181740  | -1.051879 |
| H                       | -4.884579 | -2.181800 | 1.051951  | C | 5.934762  | -0.162825 | 1.451817  |
| C                       | 1.337545  | 0.527368  | 0.004173  | H | 5.063505  | 1.732595  | 1.066750  |
| C                       | 0.421195  | 2.821104  | -0.004155 | N | 3.273216  | 6.390857  | -1.850219 |
| C                       | -0.476520 | 4.964686  | 0.933943  | N | 3.897153  | -5.997427 | -1.953623 |
| C                       | -2.828700 | 5.218975  | 1.437032  | N | 6.752389  | -2.449349 | 1.851432  |
| H                       | -4.031671 | 3.515182  | 1.053323  |   |           |           |           |
| C                       | 2.230493  | -1.774945 | 0.015019  |   |           |           |           |

|      |                     |           |           |   |           |           |           |
|------|---------------------|-----------|-----------|---|-----------|-----------|-----------|
| H    | 1.964627            | -7.497492 | -2.421760 | C | 0.387162  | 1.355475  | 0.000661  |
| H    | 0.327380            | -7.220468 | -2.200049 | C | -0.276088 | 3.674277  | 0.415704  |
| N    | 5.482187            | 4.593963  | -1.958338 | C | -2.615794 | 4.194304  | 0.921528  |
| N    | 7.145239            | 0.370561  | 1.967222  | C | 1.061580  | -1.042333 | -0.001523 |
| H    | 2.426872            | 6.805429  | -2.214991 | C | -0.670444 | -2.799033 | -0.001031 |
| H    | 4.075959            | 6.594893  | -2.425653 | C | -2.316389 | -4.427702 | 0.954906  |
| H    | 4.751758            | -5.454224 | -2.008522 | C | -4.587193 | -3.753363 | 1.452650  |
| H    | 3.698609            | -6.365028 | -2.880393 | H | -5.045909 | -1.709067 | 1.040623  |
| H    | 6.415615            | -3.323986 | 2.229297  | C | 1.416910  | 0.351313  | -0.001344 |
| H    | 7.487986            | -2.049418 | 2.413610  | C | 0.733065  | 2.723991  | 0.006537  |
| H    | 5.397868            | 5.004115  | -2.884722 | C | 0.054270  | 4.938928  | 0.963634  |
| H    | 6.138355            | 3.822930  | -2.017078 | C | -2.271261 | 5.448283  | 1.403203  |
| H    | 7.361043            | 0.014675  | 2.894806  | H | -3.644790 | 3.870792  | 0.984513  |
| H    | 7.103654            | 1.382336  | 2.022729  | C | 2.072594  | -2.027046 | -0.003790 |
|      |                     |           |           | C | 0.335342  | -3.753096 | -0.407570 |
|      |                     |           |           | C | -3.563374 | -4.743562 | 1.452938  |
| 120  |                     |           |           | H | -1.546709 | -5.184930 | 1.041445  |
| OCH3 | substituted monomer |           |           | O | -5.793337 | -4.128816 | 1.979974  |
| C    | -7.456248           | -0.976930 | -1.976005 | C | 2.775027  | 0.735505  | -0.003678 |
| O    | -7.080282           | 0.402294  | -1.967780 | C | 2.072487  | 3.085242  | -0.401727 |
| H    | -7.465971           | -1.386088 | -0.955204 | C | -0.896396 | 5.820788  | 1.434069  |
| H    | -6.769238           | -1.572668 | -2.593595 | H | 1.091977  | 5.228555  | 1.076574  |
| H    | -8.462622           | -1.008518 | -2.400053 | O | -3.161296 | 6.365665  | 1.888181  |
| C    | -5.852079           | 0.713983  | -1.450540 | C | 1.711385  | -3.365935 | -0.413813 |
| C    | -5.492106           | 2.091755  | -1.464302 | C | 3.402153  | -1.630607 | 0.401631  |
| C    | -4.947220           | -0.212214 | -0.953968 | C | -0.000107 | -5.023031 | -0.940062 |
| C    | -4.261203           | 2.473665  | -0.972830 | O | -3.792418 | -6.015878 | 1.929184  |
| O    | -6.348320           | 3.059983  | -1.945430 | C | -6.836266 | -3.152143 | 1.985788  |
| C    | -3.689778           | 0.168868  | -0.419046 | C | 3.094505  | 2.085933  | -0.407990 |
| H    | -5.175765           | -1.266056 | -1.026330 | C | 3.756416  | -0.245891 | 0.403412  |
| C    | -3.335739           | 1.553430  | -0.420218 | C | 2.375370  | 4.372756  | -0.912904 |
| H    | -3.994729           | 3.518571  | -1.076595 | O | -0.487192 | 7.050004  | 1.905604  |
| C    | -6.495356           | 3.060598  | -3.379474 | C | -4.549377 | 6.015558  | 1.849926  |
| C    | -2.711840           | -0.810888 | 0.001075  | C | 2.670137  | -4.269446 | -0.937030 |
| C    | -2.009251           | 1.950681  | -0.005505 | C | 4.334575  | -2.552231 | 0.940131  |
| H    | -7.184933           | 3.877094  | -3.612838 | C | 0.947249  | -5.902472 | -1.422271 |
| H    | -6.910075           | 2.109999  | -3.736036 | H | -1.037792 | -5.321039 | -1.029047 |
| H    | -5.523406           | 3.246369  | -3.859932 | C | -3.893627 | -6.101502 | 3.363967  |
| C    | -1.352951           | -0.428091 | -0.002042 | H | -7.058519 | -2.811443 | 0.963897  |
| C    | -3.032775           | -2.157675 | 0.419643  | H | -6.563851 | -2.282804 | 2.601220  |
| C    | -0.997699           | 0.966393  | -0.002900 | H | -7.710133 | -3.651631 | 2.410754  |
| C    | -1.652450           | 3.289516  | 0.407583  | C | 4.357153  | 2.434827  | -0.949114 |
| C    | -0.322528           | -1.431133 | -0.000908 | C | 5.020712  | 0.133395  | 0.921477  |
| C    | -2.008721           | -3.154925 | 0.412251  | C | 3.635990  | 4.703955  | -1.386507 |
| C    | -4.302000           | -2.489168 | 0.959451  | H | 1.580052  | 5.101267  | -0.979679 |

|   |           |           |           |                        |           |           |           |
|---|-----------|-----------|-----------|------------------------|-----------|-----------|-----------|
| C | -0.601594 | 7.208162  | 3.334010  | H                      | 7.531720  | 1.295294  | 0.838529  |
| H | -4.871243 | 5.797957  | 0.822067  | H                      | 8.583112  | 0.921615  | 2.245731  |
| H | -5.084606 | 6.887062  | 2.233987  | H                      | 6.903257  | 1.498770  | 2.502745  |
| H | -4.753600 | 5.140829  | 2.483638  |                        |           |           |           |
| C | 2.321196  | -5.524168 | -1.413376 |                        |           |           |           |
| H | 3.697634  | -3.944042 | -1.012851 | 84                     |           |           |           |
| C | 5.573182  | -2.171980 | 1.413726  | OH substituted monomer |           |           |           |
| H | 4.069504  | -3.597300 | 1.045184  | C                      | 1.216241  | -0.768542 | -0.000814 |
| O | 0.539131  | -7.134180 | -1.884746 | C                      | 1.271460  | 0.668624  | 0.000139  |
| H | -4.067623 | -7.156963 | 3.592417  | C                      | -0.056474 | -1.438509 | -0.001658 |
| H | -4.727996 | -5.496644 | 3.740107  | C                      | 2.409492  | -1.522294 | -0.002298 |
| H | -2.953765 | -5.770836 | 3.830263  | C                      | 0.056477  | 1.438513  | 0.001562  |
| C | 4.647188  | 3.700817  | -1.413713 | C                      | 2.519900  | 1.325109  | -0.000061 |
| H | 5.128471  | 1.682611  | -1.061375 | C                      | -1.271459 | -0.668622 | -0.000205 |
| C | 5.935919  | -0.794444 | 1.395393  | C                      | -0.112708 | -2.848740 | -0.005701 |
| H | 5.252980  | 1.186105  | 0.993509  | C                      | 3.627849  | -0.861715 | 0.413276  |
| O | 3.986488  | 5.935553  | -1.865300 | C                      | 2.335194  | -2.904415 | -0.416129 |
| H | -0.239895 | 8.216305  | 3.556281  | C                      | -1.216241 | 0.768545  | 0.000735  |
| H | 0.026919  | 6.466268  | 3.848502  | C                      | 0.112710  | 2.848742  | 0.005618  |
| H | -1.642591 | 7.105217  | 3.662814  | C                      | 3.680304  | 0.569766  | 0.413020  |
| O | 3.206238  | -6.438043 | -1.912562 | C                      | 2.555674  | 2.709089  | -0.412909 |
| O | 6.434201  | -3.143865 | 1.877677  | C                      | -2.519898 | -1.325105 | 0.000079  |
| C | 0.626536  | -7.292937 | -3.314276 | C                      | 1.067877  | -3.572920 | -0.422385 |
| O | 5.919118  | 3.964152  | -1.876337 | C                      | -1.347164 | -3.478628 | 0.410546  |
| O | 7.175007  | -0.484036 | 1.882512  | C                      | 4.723393  | -1.579819 | 0.952028  |
| C | 2.989853  | 6.963196  | -1.820304 | C                      | 3.455116  | -3.590697 | -0.947739 |
| C | 4.593659  | -6.083357 | -1.898008 | C                      | -2.409487 | 1.522298  | 0.002276  |
| C | 6.626624  | -3.135685 | 3.306299  | C                      | 1.347195  | 3.478630  | -0.410616 |
| H | 0.266706  | -8.303535 | -3.528129 | C                      | -1.067852 | 3.572923  | 0.422298  |
| H | 1.660176  | -7.183805 | -3.664169 | C                      | 4.829081  | 1.197103  | 0.956443  |
| H | -0.016856 | -6.555794 | -3.817372 | C                      | 3.723640  | 3.299518  | -0.956698 |
| C | 6.008377  | 4.144309  | -3.303707 | C                      | -2.555651 | -2.709075 | 0.412915  |
| C | 7.560834  | 0.894958  | 1.861404  | C                      | -3.680337 | -0.569764 | -0.412958 |
| H | 2.636143  | 7.121599  | -0.792143 | C                      | 0.992583  | -4.881195 | -0.959107 |
| H | 2.132907  | 6.710393  | -2.460639 | C                      | -1.376084 | -4.789186 | 0.946073  |
| H | 3.479413  | 7.866264  | -2.192174 | C                      | 5.845288  | -0.945829 | 1.451062  |
| H | 4.933064  | -5.866918 | -0.875606 | H                      | 4.670728  | -2.656775 | 1.054927  |
| H | 4.783841  | -5.206751 | -2.533476 | C                      | 3.355649  | -4.876226 | -1.438919 |
| H | 5.124691  | -6.952455 | -2.293181 | H                      | 4.407683  | -3.077289 | -1.035512 |
| H | 7.312775  | -3.959483 | 3.523507  | C                      | -2.335182 | 2.904410  | 0.416087  |
| H | 5.668156  | -3.306018 | 3.818537  | C                      | -3.627877 | 0.861706  | -0.413246 |
| H | 7.064358  | -2.188171 | 3.642574  | C                      | 1.376101  | 4.789167  | -0.946183 |
| H | 7.063936  | 4.334334  | -3.518923 | C                      | -0.992563 | 4.881217  | 0.958988  |
| H | 5.401945  | 4.995599  | -3.635264 | C                      | 5.891078  | 0.469182  | 1.453548  |
| H | 5.682590  | 3.230194  | -3.821727 | H                      | 4.851799  | 2.278513  | 1.054689  |

|   |           |           |           |                          |           |           |           |
|---|-----------|-----------|-----------|--------------------------|-----------|-----------|-----------|
| C | 3.724815  | 4.587065  | -1.453561 | H                        | -7.521033 | 1.096632  | -2.356438 |
| H | 4.627247  | 2.705217  | -1.057105 |                          |           |           |           |
| C | -3.723599 | -3.299509 | 0.956744  |                          |           |           |           |
| C | -4.829140 | -1.197110 | -0.956305 |                          |           |           |           |
| C | 2.104257  | -5.539312 | -1.449025 | 120                      |           |           |           |
| H | 0.035268  | -5.378160 | -1.054785 | SCH3 substituted monomer |           |           |           |
| C | -2.533603 | -5.352759 | 1.448213  | C                        | -3.982392 | -6.038519 | -3.833463 |
| H | -0.462002 | -5.362927 | 1.035576  | S                        | -4.139498 | -6.284272 | -2.011899 |
| O | 6.862643  | -1.697342 | 1.980633  | H                        | -2.962151 | -5.732455 | -4.081698 |
| O | 4.412898  | -5.572737 | -1.991518 | H                        | -4.706410 | -5.296149 | -4.179658 |
| C | -3.455084 | 3.590698  | 0.947740  | H                        | -4.200337 | -7.008841 | -4.290846 |
| C | -4.723432 | 1.579813  | -0.951955 | C                        | -3.796277 | -4.621804 | -1.426771 |
| C | 2.533638  | 5.352736  | -1.448305 | C                        | -4.777330 | -3.588824 | -1.474089 |
| H | 0.462040  | 5.362932  | -1.035704 | C                        | -2.535252 | -4.339410 | -0.928141 |
| C | -2.104222 | 5.539340  | 1.448912  | C                        | -4.433047 | -2.321309 | -1.020658 |
| H | -0.035230 | 5.378153  | 1.054645  | S                        | -6.380505 | -3.984130 | -2.143106 |
| O | 7.015379  | 1.037557  | 2.024028  | C                        | -2.175791 | -3.063355 | -0.430974 |
| O | 4.829586  | 5.190802  | -2.025550 | H                        | -1.784571 | -5.118175 | -0.983770 |
| C | -3.724778 | -4.587071 | 1.453550  | C                        | -3.161979 | -2.028870 | -0.474459 |
| H | -4.627163 | -2.705153 | 1.057217  | H                        | -5.136059 | -1.507496 | -1.124085 |
| C | -5.891156 | -0.469188 | -1.453393 | C                        | -7.194214 | -2.344898 | -2.219407 |
| H | -4.851924 | -2.278524 | -1.054505 | C                        | -0.824070 | -2.740924 | -0.036859 |
| O | 1.963814  | -6.795330 | -1.977394 | C                        | -2.797955 | -0.687597 | -0.070712 |
| O | -2.491221 | -6.615840 | 1.977163  | H                        | -6.625624 | -1.653642 | -2.849342 |
| H | 7.520848  | -1.096617 | 2.356772  | H                        | -7.329699 | -1.915584 | -1.221944 |
| H | 5.208648  | -5.029616 | -1.939024 | H                        | -8.173816 | -2.530295 | -2.669142 |
| C | -3.355617 | 4.876236  | 1.438873  | C                        | -0.433892 | -1.385899 | -0.083461 |
| H | -4.407614 | 3.077234  | 1.035593  | C                        | 0.156342  | -3.705963 | 0.401386  |
| C | -5.845357 | 0.945816  | -1.450932 | C                        | -1.429548 | -0.348601 | -0.080406 |
| H | -4.670827 | 2.656775  | -1.054821 | C                        | -3.741620 | 0.318212  | 0.362135  |
| O | 2.491251  | 6.615803  | -1.977292 | C                        | 0.959624  | -1.046177 | -0.119387 |
| O | -1.963783 | 6.795366  | 1.977258  | C                        | 1.545658  | -3.358672 | 0.398302  |
| H | 6.889411  | 1.992438  | 2.080043  | C                        | -0.214888 | -4.938771 | 0.990813  |
| H | 5.549985  | 4.550579  | -2.067775 | C                        | -1.028063 | 1.033809  | -0.065592 |
| O | -4.829532 | -5.190832 | 2.025547  | C                        | -3.343375 | 1.692353  | 0.374975  |
| O | -7.015466 | -1.037577 | -2.023829 | C                        | -5.003354 | -0.031073 | 0.900691  |
| H | 2.826106  | -7.086877 | -2.304312 | C                        | 1.359312  | 0.331905  | -0.154939 |
| H | -3.363860 | -6.826084 | 2.337149  | C                        | 1.945941  | -2.052688 | -0.081203 |
| O | -4.412833 | 5.572746  | 1.991528  | C                        | 2.472058  | -4.262778 | 0.966448  |
| O | -6.862738 | 1.697342  | -1.980441 | C                        | 0.708054  | -5.828062 | 1.515269  |
| H | 3.363916  | 6.826088  | -2.337187 | H                        | -1.265491 | -5.180892 | 1.096931  |
| H | -2.826088 | 7.086940  | 2.304120  | C                        | 0.369458  | 1.371719  | -0.082293 |
| H | -5.549805 | -4.550494 | 2.068185  | C                        | -2.003751 | 2.052759  | -0.030637 |
| H | -6.889735 | -1.992520 | -2.079303 | C                        | -4.244729 | 2.630732  | 0.934588  |
| H | -5.208665 | 5.029772  | 1.938753  | C                        | -5.892670 | 0.912450  | 1.398527  |
|   |           |           |           | H                        | -5.250745 | -1.080641 | 0.964395  |

|   |           |           |           |                        |           |           |           |
|---|-----------|-----------|-----------|------------------------|-----------|-----------|-----------|
| C | 2.727163  | 0.664539  | -0.223216 | H                      | 1.224059  | 5.258580  | -0.918712 |
| C | 3.280672  | -1.716426 | -0.533909 | C                      | 3.795776  | 4.452220  | 1.461923  |
| C | 2.094819  | -5.496948 | 1.482861  | H                      | 1.768447  | 4.993715  | 1.131627  |
| H | 3.503981  | -3.952245 | 1.034248  | S                      | -3.291881 | 6.864866  | -1.813213 |
| S | 0.110688  | -7.361759 | 2.232351  | H                      | -5.258595 | 3.543878  | 4.131315  |
| C | 0.767680  | 2.724475  | -0.022721 | H                      | -6.604306 | 2.348132  | 4.176999  |
| C | -1.594912 | 3.393807  | -0.394427 | H                      | -6.946770 | 4.094508  | 4.365791  |
| C | -5.493989 | 2.280603  | 1.417594  | S                      | 7.443011  | -0.674895 | -2.269655 |
| H | -3.932090 | 3.660609  | 1.052893  | S                      | 6.461684  | 3.556110  | 1.940606  |
| S | -7.496627 | 0.495810  | 2.051224  | C                      | 6.627857  | -3.697293 | -3.714294 |
| C | 3.662638  | -0.341970 | -0.680001 | S                      | -0.138826 | 7.546840  | -1.834608 |
| C | 3.107564  | 1.966110  | 0.267584  | S                      | 4.110937  | 6.041507  | 2.240433  |
| C | 4.168539  | -2.706109 | -1.005240 | C                      | -4.901691 | 6.008915  | -1.638211 |
| S | 3.259134  | -6.675494 | 2.129313  | C                      | 8.008044  | 0.719634  | -1.211233 |
| C | 0.263842  | -6.976717 | 4.030346  | C                      | 6.244166  | 3.593673  | 3.769447  |
| C | -0.205366 | 3.732324  | -0.366556 | H                      | 7.220596  | -2.833629 | -4.027395 |
| C | 2.128142  | 2.999619  | 0.379017  | H                      | 5.629566  | -3.662606 | -4.159491 |
| C | -2.516578 | 4.349931  | -0.879230 | H                      | 7.134617  | -4.617829 | -4.021589 |
| S | -6.558689 | 3.575544  | 2.061434  | C                      | -0.278501 | 7.342965  | -3.663420 |
| C | -7.470248 | -1.335497 | 2.033350  | C                      | 5.210689  | 6.824249  | 0.986924  |
| C | 4.873658  | -0.016103 | -1.370866 | H                      | -5.068733 | 5.696082  | -0.602925 |
| C | 4.396956  | 2.202316  | 0.795445  | H                      | -4.968905 | 5.147500  | -2.310284 |
| C | 5.431081  | -2.400078 | -1.488209 | H                      | -5.653169 | 6.751409  | -1.921439 |
| H | 3.851354  | -3.740178 | -1.029839 | H                      | 7.569827  | 0.623577  | -0.214921 |
| C | 4.865282  | -5.833247 | 1.871086  | H                      | 7.753709  | 1.690674  | -1.641807 |
| H | -0.397881 | -6.146007 | 4.291674  | H                      | 9.095180  | 0.617431  | -1.143418 |
| H | 1.301054  | -6.741051 | 4.282649  | H                      | 5.755485  | 2.674222  | 4.104268  |
| H | -0.048233 | -7.881429 | 4.561715  | H                      | 5.666340  | 4.474205  | 4.059568  |
| C | 0.172287  | 5.012920  | -0.837588 | H                      | 7.253011  | 3.650711  | 4.190915  |
| C | 2.511003  | 4.218070  | 0.988983  | H                      | -1.314265 | 7.138155  | -3.946564 |
| C | -2.133801 | 5.625692  | -1.277801 | H                      | 0.382356  | 6.539688  | -4.001526 |
| H | -3.549546 | 4.051142  | -0.978719 | H                      | 0.040982  | 8.294906  | -4.099368 |
| C | -6.305047 | 3.355487  | 3.875749  | H                      | 4.681818  | 6.917313  | 0.033880  |
| H | -6.650060 | -1.722127 | 2.646193  | H                      | 6.126892  | 6.239156  | 0.873940  |
| H | -7.390893 | -1.725938 | 1.014327  | H                      | 5.448965  | 7.819881  | 1.374884  |
| H | -8.427329 | -1.641938 | 2.464878  |                        |           |           |           |
| C | 5.808875  | -1.035025 | -1.641576 |                        |           |           |           |
| H | 5.013163  | 0.965331  | -1.809907 | 84                     |           |           |           |
| C | 4.763844  | 3.407838  | 1.373924  | SH substituted monomer |           |           |           |
| H | 5.114819  | 1.390321  | 0.784304  | C                      | -0.150053 | 1.430933  | 0.001609  |
| S | 6.491116  | -3.794604 | -1.879117 | C                      | 1.164561  | 0.844947  | 0.004017  |
| H | 4.929517  | -4.911797 | 2.458458  | C                      | -1.313630 | 0.585880  | -0.002441 |
| H | 5.029473  | -5.619406 | 0.810555  | C                      | -0.295444 | 2.833713  | 0.007455  |
| H | 5.620280  | -6.542441 | 2.222245  | C                      | 1.313767  | -0.585605 | 0.002419  |
| C | -0.745783 | 5.952494  | -1.275492 | C                      | 2.305914  | 1.673386  | 0.008525  |

|   |           |           |           |                            |           |           |           |
|---|-----------|-----------|-----------|----------------------------|-----------|-----------|-----------|
| C | -1.164390 | -0.844678 | -0.003934 | H                          | 4.981343  | -1.955310 | 1.056054  |
| C | -2.602080 | 1.160360  | -0.002287 | C                          | 4.037373  | -4.349473 | -1.433925 |
| C | 0.837136  | 3.632438  | -0.401735 | H                          | 4.781457  | -2.394240 | -1.055587 |
| C | -1.569026 | 3.380033  | 0.419753  | S                          | 4.436017  | 6.029621  | -2.062391 |
| C | 0.150219  | -1.430669 | -0.001723 | S                          | 7.111520  | 2.342789  | 2.067606  |
| C | 2.602182  | -1.160055 | 0.002246  | C                          | -5.791776 | -1.320246 | -1.429997 |
| C | 2.143859  | 3.048446  | -0.408348 | H                          | -4.462566 | -2.943702 | -1.050620 |
| C | 3.562045  | 1.091138  | 0.424943  | C                          | -3.053193 | -5.093076 | 1.424017  |
| C | -2.305697 | -1.673133 | -0.008194 | H                          | -4.184826 | -3.328605 | 1.031971  |
| C | -2.728037 | 2.539653  | 0.409158  | S                          | -5.644256 | 4.880432  | 2.019200  |
| C | -3.712953 | 0.332240  | -0.413345 | S                          | -7.412421 | 0.931413  | -2.006957 |
| C | 0.684095  | 4.925745  | -0.950423 | H                          | 2.223193  | 7.286612  | -3.110833 |
| C | -1.688054 | 4.682647  | 0.952686  | H                          | -1.698289 | 7.126579  | 1.973806  |
| C | 0.295651  | -2.833470 | -0.007817 | C                          | 2.891421  | -5.190780 | -1.424819 |
| C | 3.712925  | -0.332143 | 0.413850  | H                          | 0.798185  | -5.293750 | -1.033773 |
| C | 2.728228  | -2.539179 | -0.409551 | C                          | -1.753005 | -5.666315 | 1.434427  |
| C | 3.212457  | 3.798496  | -0.947744 | H                          | 0.313540  | -5.333568 | 1.062083  |
| C | 4.607459  | 1.873358  | 0.963706  | S                          | 7.411446  | -0.932599 | 2.009052  |
| C | -3.561960 | -1.091021 | -0.424045 | S                          | 5.644741  | -4.879375 | -2.019884 |
| C | -2.143622 | -3.048287 | 0.408204  | H                          | 5.314877  | 5.007125  | -2.020569 |
| C | -3.927949 | 3.054168  | 0.950318  | H                          | 6.412784  | 3.495912  | 2.021485  |
| C | -4.899459 | 0.879747  | -0.952169 | S                          | -7.112259 | -2.343917 | -2.063795 |
| C | 1.752995  | 5.666020  | -1.435839 | S                          | -4.436027 | -6.029832 | 2.061147  |
| H | -0.313541 | 5.333064  | -1.063713 | H                          | -5.217802 | 5.553404  | 3.111797  |
| C | -2.890980 | 5.191544  | 1.423777  | H                          | -7.628737 | 0.168621  | -3.102017 |
| H | -0.797794 | 5.294377  | 1.032491  | S                          | 3.018370  | -6.856475 | -2.056661 |
| C | 1.569260  | -3.379597 | -0.420402 | S                          | -1.408625 | -7.319872 | 2.030158  |
| C | -0.836936 | -3.632345 | 0.401198  | H                          | 7.627378  | -0.170408 | 3.104606  |
| C | 4.899036  | -0.880032 | 0.953067  | H                          | 5.218457  | -5.551930 | -3.112806 |
| C | 3.928190  | -3.053449 | -0.950785 | H                          | -6.413373 | -3.496942 | -2.017511 |
| C | 3.053248  | 5.092934  | -1.425018 | H                          | -5.314774 | -5.007217 | 2.019849  |
| H | 4.185107  | 3.328749  | -1.031902 | H                          | 1.698919  | -7.125785 | -1.975386 |
| C | 5.791376  | 1.319571  | 1.432371  | H                          | -2.223161 | -7.287772 | 3.108687  |
| H | 4.462602  | 2.943260  | 1.053630  |                            |           |           |           |
| C | -4.607532 | -1.873657 | -0.961748 |                            |           |           |           |
| C | -3.212282 | -3.798426 | 0.947328  |                            |           |           |           |
| C | -4.036980 | 4.350312  | 1.433187  | 192                        |           |           |           |
| H | -4.781233 | 2.395040  | 1.055321  | CCH substituted homodimers |           |           |           |
| C | -5.937218 | 0.093746  | -1.432686 | C                          | 0.716646  | 3.652579  | -2.373878 |
| H | -4.982011 | 1.954957  | -1.055482 | C                          | -0.716583 | 3.652578  | -2.373880 |
| S | 1.408456  | 7.319217  | -2.032470 | C                          | -1.424656 | 2.471529  | -1.936890 |
| S | -3.017766 | 6.857427  | 2.055166  | C                          | -2.819223 | 2.456667  | -1.559378 |
| C | 1.688418  | -4.682058 | -0.953681 | C                          | -3.534115 | 1.216748  | -1.560168 |
| C | -0.684039 | -4.925958 | 0.949250  | C                          | -2.849058 | 0.003110  | -1.939753 |
| C | 5.936668  | -0.094427 | 1.434428  | C                          | -3.517222 | -1.200142 | -2.378242 |
|   |           |           |           | C                          | -2.801017 | -2.441330 | -2.376893 |



|   |           |           |           |   |           |           |           |
|---|-----------|-----------|-----------|---|-----------|-----------|-----------|
| C | -1.424665 | -2.463781 | -1.938957 | H | -2.939273 | 4.542525  | -1.024464 |
| C | -0.715628 | -3.662456 | -1.555813 | H | -2.864454 | -4.495567 | -3.045687 |
| C | 0.715700  | -3.662458 | -1.555829 | H | -5.325226 | -0.227140 | -3.052725 |
| C | 1.424730  | -2.463781 | -1.938982 | H | 2.463974  | -4.805925 | -1.022260 |
| C | 2.801076  | -2.441326 | -2.376935 | H | -2.463892 | -4.805915 | -1.022201 |
| C | 3.517281  | -1.200138 | -2.378286 | H | 5.325282  | -0.227136 | -3.052775 |
| C | 2.849122  | 0.003111  | -1.939784 | H | 2.864506  | -4.495561 | -3.045735 |
| C | 3.534183  | 1.216746  | -1.560197 | C | -1.456253 | 6.931465  | -4.033995 |
| C | 2.819288  | 2.456663  | -1.559385 | C | 1.456314  | 6.931469  | -4.033986 |
| C | 1.424720  | 2.471529  | -1.936892 | C | 5.297459  | 4.740984  | 0.069984  |
| C | 0.719268  | 1.250282  | -1.893287 | C | 6.753597  | 2.209650  | 0.070892  |
| C | -0.719204 | 1.250282  | -1.893282 | C | 6.727006  | -2.198726 | -4.037518 |
| C | -1.438790 | 0.003270  | -1.895487 | C | 5.274564  | -4.722836 | -4.030448 |
| C | -0.719728 | -1.242130 | -1.896609 | C | 1.460217  | -6.945756 | 0.079889  |
| C | 0.719793  | -1.242130 | -1.896619 | C | -1.460121 | -6.945754 | 0.079913  |
| C | 1.438854  | 0.003270  | -1.895502 | C | -5.274513 | -4.722838 | -4.030405 |
| C | 3.472116  | 3.604365  | -1.065436 | C | -6.726951 | -2.198726 | -4.037468 |
| C | 4.755572  | 3.570911  | -0.527989 | C | -6.753511 | 2.209656  | 0.070951  |
| C | 5.469833  | 2.330042  | -0.527280 | C | -5.297384 | 4.740996  | 0.069996  |
| C | 4.854065  | 1.203917  | -1.065102 | C | 0.715628  | 3.662456  | 1.555813  |
| C | -1.386391 | 4.754855  | -2.946223 | C | -0.715700 | 3.662458  | 1.555829  |
| C | -0.715860 | 5.858325  | -3.465619 | C | -1.424730 | 2.463781  | 1.938982  |
| C | 0.715922  | 5.858326  | -3.465616 | C | -2.801076 | 2.441326  | 2.376935  |
| C | 1.386453  | 4.754858  | -2.946219 | C | -3.517281 | 1.200138  | 2.378286  |
| C | -4.853989 | 1.203920  | -1.065054 | C | -2.849122 | -0.003111 | 1.939784  |
| C | -5.469754 | 2.330048  | -0.527237 | C | -3.534183 | -1.216746 | 1.560197  |
| C | -4.755499 | 3.570920  | -0.527973 | C | -2.819288 | -2.456663 | 1.559385  |
| C | -3.472050 | 3.604373  | -1.065439 | C | -1.424720 | -2.471529 | 1.936892  |
| C | -3.421381 | -3.573449 | -2.946845 | C | -0.716646 | -3.652579 | 2.373878  |
| C | -4.712672 | -3.544607 | -3.465513 | C | 0.716583  | -3.652578 | 2.373880  |
| C | -5.427575 | -2.303795 | -3.468550 | C | 1.424656  | -2.471529 | 1.936890  |
| C | -4.806568 | -1.170920 | -2.951030 | C | 2.819223  | -2.456667 | 1.559378  |
| C | 1.384986  | -4.799404 | -1.059700 | C | 3.534115  | -1.216748 | 1.560168  |
| C | 0.715902  | -5.892578 | -0.517516 | C | 2.849058  | -0.003110 | 1.939753  |
| C | -0.715813 | -5.892576 | -0.517500 | C | 3.517222  | 1.200142  | 2.378242  |
| C | -1.384906 | -4.799400 | -1.059666 | C | 2.801017  | 2.441330  | 2.376893  |
| C | 4.806623  | -1.170916 | -2.951082 | C | 1.424665  | 2.463781  | 1.938957  |
| C | 5.427628  | -2.303791 | -3.468604 | C | 0.719728  | 1.242130  | 1.896609  |
| C | 4.712724  | -3.544602 | -3.465565 | C | -0.719793 | 1.242130  | 1.896619  |
| C | 3.421434  | -3.573444 | -2.946895 | C | -1.438854 | -0.003270 | 1.895502  |
| H | 2.939334  | 4.542513  | -1.024442 | C | -0.719268 | -1.250282 | 1.893287  |
| H | 5.396128  | 0.271159  | -1.024813 | C | 0.719204  | -1.250282 | 1.893282  |
| H | -2.463111 | 4.732773  | -3.047178 | C | 1.438790  | -0.003270 | 1.895487  |
| H | 2.463174  | 4.732778  | -3.047169 | C | 3.421381  | 3.573449  | 2.946845  |
| H | -5.396045 | 0.271160  | -1.024745 | C | 4.712672  | 3.544607  | 3.465513  |

|   |           |           |           |   |           |           |           |
|---|-----------|-----------|-----------|---|-----------|-----------|-----------|
| C | 5.427575  | 2.303795  | 3.468550  | C | -5.274564 | 4.722836  | 4.030448  |
| C | 4.806568  | 1.170920  | 2.951030  | C | -5.743628 | 5.731152  | 4.511255  |
| C | -1.384986 | 4.799404  | 1.059700  | C | -2.109759 | 7.816744  | -0.614668 |
| C | -0.715902 | 5.892578  | 0.517516  | C | 2.109661  | 7.816743  | -0.614693 |
| C | 0.715813  | 5.892576  | 0.517500  | C | 5.728089  | 5.737705  | 0.606226  |
| C | 1.384906  | 4.799400  | 1.059666  | C | 5.743577  | 5.731150  | 4.511222  |
| C | -4.806623 | 1.170916  | 2.951082  | C | 7.833388  | 2.095895  | 4.520340  |
| C | -5.427628 | 2.303791  | 3.468604  | C | 7.832090  | 2.078351  | 0.605815  |
| C | -4.712724 | 3.544602  | 3.465565  | C | 7.831998  | -2.078353 | -0.605882 |
| C | -3.421434 | 3.573444  | 2.946895  | C | 5.728010  | -5.737718 | -0.606240 |
| C | -3.472116 | -3.604365 | 1.065436  | C | 7.833448  | -2.095901 | -4.520383 |
| C | -4.755572 | -3.570911 | 0.527989  | C | 5.743628  | -5.731152 | -4.511255 |
| C | -5.469833 | -2.330042 | 0.527280  | C | 2.109759  | -7.816744 | 0.614668  |
| C | -4.854065 | -1.203917 | 1.065102  | C | -2.109661 | -7.816743 | 0.614693  |
| C | 1.386391  | -4.754855 | 2.946223  | C | -2.097970 | -7.838495 | 4.517168  |
| C | 0.715860  | -5.858325 | 3.465619  | C | 2.097908  | -7.838488 | 4.517182  |
| C | -0.715922 | -5.858326 | 3.465616  | C | -5.743577 | -5.731150 | -4.511222 |
| C | -1.386453 | -4.754858 | 2.946219  | C | -5.728089 | -5.737705 | -0.606226 |
| C | 4.853989  | -1.203920 | 1.065054  | C | -7.833388 | -2.095895 | -4.520340 |
| C | 5.469754  | -2.330048 | 0.527237  | C | -7.832090 | -2.078351 | -0.605815 |
| C | 4.755499  | -3.570920 | 0.527973  | C | -7.831998 | 2.078353  | 0.605882  |
| C | 3.472050  | -3.604373 | 1.065439  | C | -7.833448 | 2.095901  | 4.520383  |
| H | 2.864454  | 4.495567  | 3.045687  | C | -5.728010 | 5.737718  | 0.606240  |
| H | 5.325226  | 0.227140  | 3.052725  | C | -2.097908 | 7.838488  | -4.517182 |
| H | -2.463974 | 4.805925  | 1.022260  | C | 2.097970  | 7.838495  | -4.517168 |
| H | 2.463892  | 4.805915  | 1.022201  | H | -2.655739 | 8.637240  | -4.951412 |
| H | -5.325282 | 0.227136  | 3.052775  | H | 2.655803  | 8.637251  | -4.951387 |
| H | -2.864506 | 4.495561  | 3.045735  | H | -2.668984 | 8.577927  | -1.109406 |
| H | -2.939334 | -4.542513 | 1.024442  | H | 2.668881  | 8.577922  | -1.109442 |
| H | -5.396128 | -0.271159 | 1.024813  | H | 6.159679  | 6.613053  | 4.943457  |
| H | 2.463111  | -4.732773 | 3.047178  | H | 6.107652  | 6.601726  | 1.102445  |
| H | -2.463174 | -4.732778 | 3.047169  | H | 8.803639  | 2.011277  | 4.955304  |
| H | 5.396045  | -0.271160 | 1.024745  | H | 8.770362  | 1.970489  | 1.100658  |
| H | 2.939273  | -4.542525 | 1.024464  | H | 8.770271  | -1.970477 | -1.100720 |
| C | -1.460217 | 6.945756  | -0.079889 | H | 8.803706  | -2.011285 | -4.955332 |
| C | 1.460121  | 6.945754  | -0.079913 | H | 6.159747  | -6.613033 | -4.943519 |
| C | 5.274513  | 4.722838  | 4.030405  | H | 6.107563  | -6.601742 | -1.102462 |
| C | 6.726951  | 2.198726  | 4.037468  | H | 2.655739  | -8.637240 | 4.951412  |
| C | 6.753511  | -2.209656 | -0.070951 | H | -2.655803 | -8.637251 | 4.951387  |
| C | 5.297384  | -4.740996 | -0.069996 | H | 2.668984  | -8.577927 | 1.109406  |
| C | 1.456253  | -6.931465 | 4.033995  | H | -2.668881 | -8.577922 | 1.109442  |
| C | -1.456314 | -6.931469 | 4.033986  | H | -6.107652 | -6.601726 | -1.102445 |
| C | -5.297459 | -4.740984 | -0.069984 | H | -6.159679 | -6.613053 | -4.943457 |
| C | -6.753597 | -2.209650 | -0.070892 | H | -8.803639 | -2.011277 | -4.955304 |
| C | -6.727006 | 2.198726  | 4.037518  | H | -8.770362 | -1.970489 | -1.100658 |

|                            |           |           |           |   |           |           |           |
|----------------------------|-----------|-----------|-----------|---|-----------|-----------|-----------|
| H                          | -8.770271 | 1.970477  | 1.100720  | C | -3.599799 | -4.803431 | -0.582431 |
| H                          | -8.803706 | 2.011285  | 4.955332  | C | -2.371423 | -5.510752 | -0.580529 |
| H                          | -6.107563 | 6.601742  | 1.102462  | C | -1.238001 | -4.877307 | -1.058646 |
| H                          | -6.159747 | 6.613033  | 4.943519  | C | -4.761599 | 1.378000  | -2.903739 |
|                            |           |           |           | C | -5.857892 | 0.710610  | -3.422255 |
|                            |           |           |           | C | -5.857998 | -0.708514 | -3.422412 |
|                            |           |           |           | C | -4.761812 | -1.376178 | -2.904019 |
| 216                        |           |           |           | C | -1.236891 | 4.878414  | -1.059238 |
| CH3 substituted homodimers |           |           |           | C | -2.370062 | 5.512159  | -0.580934 |
| C                          | 3.665651  | 0.713532  | -1.515893 | C | -3.598533 | 4.805004  | -0.582231 |
| C                          | 3.665491  | -0.713602 | -1.515859 | C | -3.619454 | 3.507379  | -1.062490 |
| C                          | 2.457979  | -1.423930 | -1.872681 | H | 4.478671  | 2.862151  | -3.000438 |
| C                          | 2.430574  | -2.798248 | -2.316740 | H | 0.226256  | 5.317424  | -3.007752 |
| C                          | 1.192616  | -3.513001 | -2.318109 | H | 4.823047  | -2.453682 | -1.006470 |
| C                          | -0.011413 | -2.849515 | -1.874502 | H | 4.823549  | 2.453358  | -1.006485 |
| C                          | -1.230772 | -3.540585 | -1.520592 | H | 0.225199  | -5.317062 | -3.006778 |
| C                          | -2.467000 | -2.827927 | -1.521899 | H | 4.477981  | -2.862384 | -3.000347 |
| C                          | -2.478260 | -1.425443 | -1.874314 | H | -4.552914 | -2.963073 | -1.012307 |
| C                          | -3.654412 | -0.714074 | -2.319272 | H | -0.299403 | -5.409150 | -1.004109 |
| C                          | -3.654283 | 0.715602  | -2.319154 | H | -4.730445 | 2.455842  | -3.009579 |
| C                          | -2.477961 | 1.426682  | -1.874194 | H | -4.730816 | -2.454005 | -3.010075 |
| C                          | -2.466350 | 2.829165  | -1.521774 | H | -0.298188 | 5.410122  | -1.005143 |
| C                          | -1.229988 | 3.541583  | -1.520882 | H | -4.552086 | 2.964728  | -1.011519 |
| C                          | -0.010808 | 2.850211  | -1.874838 | C | 2.212128  | 6.799333  | -4.022629 |
| C                          | 1.193349  | 3.513373  | -2.318575 | H | 2.865534  | 7.508930  | -3.495183 |
| C                          | 2.431186  | 2.798400  | -2.316996 | H | 2.537393  | 6.796169  | -5.071980 |
| C                          | 2.458295  | 1.424113  | -1.872783 | H | 1.186817  | 7.181074  | -3.978715 |
| C                          | 1.236289  | 0.720640  | -1.813727 | C | 4.773061  | 5.324102  | -4.012787 |
| C                          | 1.236130  | -0.720192 | -1.813662 | H | 4.617208  | 5.589660  | -5.067393 |
| C                          | -0.010084 | -1.439692 | -1.813624 | H | 5.048773  | 6.253088  | -3.493810 |
| C                          | -1.258131 | -0.719232 | -1.812412 | H | 5.620240  | 4.633289  | -3.951470 |
| C                          | -1.257976 | 0.720215  | -1.812411 | C | 7.103378  | 1.476857  | 0.000856  |
| C                          | -0.009771 | 1.440401  | -1.813749 | H | 7.231385  | 1.240949  | 1.065164  |
| C                          | 3.560505  | 3.427939  | -2.895868 | H | 8.044172  | 1.218739  | -0.504192 |
| C                          | 3.531938  | 4.712252  | -3.411227 | H | 6.945442  | 2.556285  | -0.094805 |
| C                          | 2.302377  | 5.420955  | -3.415451 | C | 7.103094  | -1.477663 | 0.000792  |
| C                          | 1.174907  | 4.804931  | -2.900656 | H | 8.043915  | -1.219776 | -0.504327 |
| C                          | 4.827688  | -1.374607 | -1.055134 | H | 7.231213  | -1.241762 | 1.065083  |
| C                          | 5.940095  | -0.708883 | -0.572140 | H | 6.944910  | -2.557060 | -0.094821 |
| C                          | 5.940243  | 0.708325  | -0.572132 | C | 4.771867  | -5.324482 | -4.012522 |
| C                          | 4.827988  | 1.374284  | -1.055156 | H | 5.047445  | -6.253527 | -3.493582 |
| C                          | 1.173937  | -4.804680 | -2.899910 | H | 4.615890  | -5.589988 | -5.067124 |
| C                          | 2.301257  | -5.420933 | -3.414764 | H | 5.619186  | -4.633836 | -3.951254 |
| C                          | 3.530918  | -4.712395 | -3.410846 | C | 2.210717  | -6.799372 | -4.021767 |
| C                          | 3.559740  | -3.428030 | -2.895636 | H | 2.535531  | -6.796309 | -5.071261 |
| C                          | -3.620372 | -3.505901 | -1.062944 |   |           |           |           |

|   |           |           |           |   |           |           |           |
|---|-----------|-----------|-----------|---|-----------|-----------|-----------|
| H | 2.864324  | -7.508946 | -3.494543 | C | 1.257976  | -0.720215 | 1.812411  |
| H | 1.185410  | -7.181068 | -3.977393 | C | 0.009771  | -1.440401 | 1.813749  |
| C | -2.283547 | -6.901044 | -0.004516 | C | -1.236289 | -0.720640 | 1.813727  |
| H | -2.530986 | -6.888869 | 1.064948  | C | -1.236130 | 0.720192  | 1.813662  |
| H | -2.989847 | -7.585447 | -0.493763 | C | 0.010084  | 1.439692  | 1.813624  |
| H | -1.273607 | -7.309155 | -0.117496 | C | 3.620372  | 3.505901  | 1.062944  |
| C | -4.846977 | -5.426118 | -0.008261 | C | 3.599799  | 4.803431  | 0.582431  |
| H | -5.086531 | -6.377447 | -0.502351 | C | 2.371423  | 5.510752  | 0.580529  |
| H | -4.712530 | -5.640153 | 1.060121  | C | 1.238001  | 4.877307  | 1.058646  |
| H | -5.706303 | -4.756044 | -0.117577 | C | 4.761599  | -1.378000 | 2.903739  |
| C | -7.006211 | -1.476833 | -4.028780 | C | 5.857892  | -0.710610 | 3.422255  |
| H | -7.949706 | -1.255291 | -3.509733 | C | 5.857998  | 0.708514  | 3.422412  |
| H | -7.158370 | -1.205157 | -5.082408 | C | 4.761812  | 1.376178  | 2.904019  |
| H | -6.829249 | -2.555841 | -3.971624 | C | 1.236891  | -4.878414 | 1.059238  |
| C | -7.006017 | 1.479225  | -4.028415 | C | 2.370062  | -5.512159 | 0.580934  |
| H | -7.158249 | 1.207805  | -5.082098 | C | 3.598533  | -4.805004 | 0.582231  |
| H | -7.949524 | 1.257694  | -3.509383 | C | 3.619454  | -3.507379 | 1.062490  |
| H | -6.828905 | 2.558195  | -3.971019 | C | -3.560505 | -3.427939 | 2.895868  |
| C | -4.845432 | 5.427995  | -0.007787 | C | -3.531938 | -4.712252 | 3.411227  |
| H | -4.710566 | 5.642279  | 1.060485  | C | -2.302377 | -5.420955 | 3.415451  |
| H | -5.085070 | 6.379210  | -0.502057 | C | -1.174907 | -4.804931 | 2.900656  |
| H | -5.704870 | 4.757980  | -0.116585 | C | -4.827688 | 1.374607  | 1.055134  |
| C | -2.281700 | 6.902623  | -0.005401 | C | -5.940095 | 0.708883  | 0.572140  |
| H | -2.988754 | 7.586776  | -0.493892 | C | -5.940243 | -0.708325 | 0.572132  |
| H | -2.527691 | 6.890701  | 1.064401  | C | -4.827988 | -1.374284 | 1.055156  |
| H | -1.271974 | 7.310862  | -0.119830 | C | -1.173937 | 4.804680  | 2.899910  |
| C | 3.654412  | 0.714074  | 2.319272  | C | -2.301257 | 5.420933  | 3.414764  |
| C | 3.654283  | -0.715602 | 2.319154  | C | -3.530918 | 4.712395  | 3.410846  |
| C | 2.477961  | -1.426682 | 1.874194  | C | -3.559740 | 3.428030  | 2.895636  |
| C | 2.466350  | -2.829165 | 1.521774  | H | 4.552914  | 2.963073  | 1.012307  |
| C | 1.229988  | -3.541583 | 1.520882  | H | 0.299403  | 5.409150  | 1.004109  |
| C | 0.010808  | -2.850211 | 1.874838  | H | 4.730445  | -2.455842 | 3.009579  |
| C | -1.193349 | -3.513373 | 2.318575  | H | 4.730816  | 2.454005  | 3.010075  |
| C | -2.431186 | -2.798400 | 2.316996  | H | 0.298188  | -5.410122 | 1.005143  |
| C | -2.458295 | -1.424113 | 1.872783  | H | 4.552086  | -2.964728 | 1.011519  |
| C | -3.665651 | -0.713532 | 1.515893  | H | -4.478671 | -2.862151 | 3.000438  |
| C | -3.665491 | 0.713602  | 1.515859  | H | -0.226256 | -5.317424 | 3.007752  |
| C | -2.457979 | 1.423930  | 1.872681  | H | -4.823047 | 2.453682  | 1.006470  |
| C | -2.430574 | 2.798248  | 2.316740  | H | -4.823549 | -2.453358 | 1.006485  |
| C | -1.192616 | 3.513001  | 2.318109  | H | -0.225199 | 5.317062  | 3.006778  |
| C | 0.011413  | 2.849515  | 1.874502  | H | -4.477981 | 2.862384  | 3.000347  |
| C | 1.230772  | 3.540585  | 1.520592  | C | 2.283547  | 6.901044  | 0.004516  |
| C | 2.467000  | 2.827927  | 1.521899  | H | 2.989847  | 7.585447  | 0.493763  |
| C | 2.478260  | 1.425443  | 1.874314  | H | 2.530986  | 6.888869  | -1.064948 |
| C | 1.258131  | 0.719232  | 1.812412  | H | 1.273607  | 7.309155  | 0.117496  |

|   |           |           |           |
|---|-----------|-----------|-----------|
| C | 4.846977  | 5.426118  | 0.008261  |
| H | 4.712530  | 5.640153  | -1.060121 |
| H | 5.086531  | 6.377447  | 0.502351  |
| H | 5.706303  | 4.756044  | 0.117577  |
| C | 7.006211  | 1.476833  | 4.028780  |
| H | 7.158370  | 1.205157  | 5.082408  |
| H | 7.949706  | 1.255291  | 3.509733  |
| H | 6.829249  | 2.555841  | 3.971624  |
| C | 7.006017  | -1.479225 | 4.028415  |
| H | 7.949524  | -1.257694 | 3.509383  |
| H | 7.158249  | -1.207805 | 5.082098  |
| H | 6.828905  | -2.558195 | 3.971019  |
| C | 4.845432  | -5.427995 | 0.007787  |
| H | 5.085070  | -6.379210 | 0.502057  |
| H | 4.710566  | -5.642279 | -1.060485 |
| H | 5.704870  | -4.757980 | 0.116585  |
| C | 2.281700  | -6.902623 | 0.005401  |
| H | 2.527691  | -6.890701 | -1.064401 |
| H | 2.988754  | -7.586776 | 0.493892  |
| H | 1.271974  | -7.310862 | 0.119830  |
| C | -2.212128 | -6.799333 | 4.022629  |
| H | -2.537393 | -6.796169 | 5.071980  |
| H | -2.865534 | -7.508930 | 3.495183  |
| H | -1.186817 | -7.181074 | 3.978715  |
| C | -4.773061 | -5.324102 | 4.012787  |
| H | -5.048773 | -6.253088 | 3.493810  |
| H | -4.617208 | -5.589660 | 5.067393  |
| H | -5.620240 | -4.633289 | 3.951470  |
| C | -7.103378 | -1.476857 | -0.000856 |
| H | -8.044172 | -1.218739 | 0.504192  |
| H | -7.231385 | -1.240949 | -1.065164 |
| H | -6.945442 | -2.556285 | 0.094805  |
| C | -7.103094 | 1.477663  | -0.000792 |
| H | -7.231213 | 1.241762  | -1.065083 |
| H | -8.043915 | 1.219776  | 0.504327  |
| H | -6.944910 | 2.557060  | 0.094821  |
| C | -4.771867 | 5.324482  | 4.012522  |
| H | -4.615890 | 5.589988  | 5.067124  |
| H | -5.047445 | 6.253527  | 3.493582  |
| H | -5.619186 | 4.633836  | 3.951254  |
| C | -2.210717 | 6.799372  | 4.021767  |
| H | -2.864324 | 7.508946  | 3.494543  |
| H | -2.535531 | 6.796309  | 5.071261  |
| H | -1.185410 | 7.181068  | 3.977393  |

168

CN substituted homodimers

|   |           |           |           |
|---|-----------|-----------|-----------|
| C | 0.716625  | 3.651886  | -2.436181 |
| C | -0.716528 | 3.651882  | -2.436175 |
| C | -1.422078 | 2.470439  | -1.995301 |
| C | -2.813079 | 2.453016  | -1.607465 |
| C | -3.528474 | 1.212885  | -1.607030 |
| C | -2.847923 | 0.000359  | -1.995958 |
| C | -3.517908 | -1.201181 | -2.437625 |
| C | -2.801323 | -2.442155 | -2.437133 |
| C | -1.425643 | -2.462507 | -1.995844 |
| C | -0.715807 | -3.657111 | -1.603724 |
| C | 0.715947  | -3.657098 | -1.603716 |
| C | 1.425776  | -2.462490 | -1.995788 |
| C | 2.801453  | -2.442175 | -2.437037 |
| C | 3.518020  | -1.201188 | -2.437757 |
| C | 2.848071  | 0.000383  | -1.996055 |
| C | 3.528612  | 1.212918  | -1.607077 |
| C | 2.813181  | 2.453035  | -1.607487 |
| C | 1.422187  | 2.470444  | -1.995326 |
| C | 0.719111  | 1.248877  | -1.952651 |
| C | -0.718987 | 1.248874  | -1.952636 |
| C | -1.438447 | 0.002471  | -1.953942 |
| C | -0.719436 | -1.242645 | -1.954755 |
| C | 0.719573  | -1.242634 | -1.954753 |
| C | 1.438587  | 0.002482  | -1.953970 |
| C | 3.452357  | 3.598881  | -1.090304 |
| C | 4.718133  | 3.547036  | -0.520938 |
| C | 5.429691  | 2.312281  | -0.519517 |
| C | 4.840068  | 1.191097  | -1.088599 |
| C | -1.391845 | 4.746182  | -3.018765 |
| C | -0.712851 | 5.830552  | -3.562035 |
| C | 0.712925  | 5.830560  | -3.562033 |
| C | 1.391931  | 4.746197  | -3.018764 |
| C | -4.839939 | 1.191004  | -1.088610 |
| C | -5.429604 | 2.312161  | -0.519517 |
| C | -4.718073 | 3.546933  | -0.520901 |
| C | -3.452304 | 3.598837  | -1.090283 |
| C | -3.411223 | -3.574498 | -3.019093 |
| C | -4.689399 | -3.528266 | -3.563541 |
| C | -5.402326 | -2.293366 | -3.564288 |
| C | -4.803338 | -1.163259 | -3.020102 |
| C | 1.389796  | -4.781964 | -1.084830 |
| C | 0.712663  | -5.850240 | -0.511233 |

|   |           |           |           |   |           |           |          |
|---|-----------|-----------|-----------|---|-----------|-----------|----------|
| C | -0.712437 | -5.850241 | -0.511190 | C | -2.801453 | 2.442175  | 2.437037 |
| C | -1.389610 | -4.781979 | -1.084765 | C | -3.518020 | 1.201188  | 2.437757 |
| C | 4.803344  | -1.163349 | -3.020489 | C | -2.848071 | -0.000383 | 1.996055 |
| C | 5.402295  | -2.293555 | -3.564514 | C | -3.528612 | -1.212918 | 1.607077 |
| C | 4.689459  | -3.528505 | -3.563316 | C | -2.813181 | -2.453035 | 1.607487 |
| C | 3.411344  | -3.574653 | -3.018729 | C | -1.422187 | -2.470444 | 1.995326 |
| H | 2.922533  | 4.539390  | -1.056865 | C | -0.716625 | -3.651886 | 2.436181 |
| H | 5.386369  | 0.260166  | -1.054696 | C | 0.716528  | -3.651882 | 2.436175 |
| H | -2.469036 | 4.726828  | -3.119205 | C | 1.422078  | -2.470439 | 1.995301 |
| H | 2.469122  | 4.726854  | -3.119203 | C | 2.813079  | -2.453016 | 1.607465 |
| H | -5.386176 | 0.260034  | -1.054726 | C | 3.528474  | -1.212885 | 1.607030 |
| H | -2.922538 | 4.539377  | -1.056859 | C | 2.847923  | -0.000359 | 1.995958 |
| H | -2.856099 | -4.498080 | -3.118194 | C | 3.517908  | 1.201181  | 2.437625 |
| H | -5.325420 | -0.220707 | -3.119373 | C | 2.801323  | 2.442155  | 2.437133 |
| H | 2.469383  | -4.792731 | -1.053726 | C | 1.425643  | 2.462507  | 1.995844 |
| H | -2.469193 | -4.792792 | -1.053645 | C | 0.719436  | 1.242645  | 1.954755 |
| H | 5.325372  | -0.220809 | -3.120105 | C | -0.719573 | 1.242634  | 1.954753 |
| H | 2.856246  | -4.498292 | -3.117486 | C | -1.438587 | -0.002482 | 1.953970 |
| C | -1.454555 | 6.884570  | -4.179172 | C | -0.719111 | -1.248877 | 1.952651 |
| C | 1.454619  | 6.884583  | -4.179175 | C | 0.718987  | -1.248874 | 1.952636 |
| C | 5.228395  | 4.706519  | 0.137933  | C | 1.438447  | -0.002471 | 1.953942 |
| C | 6.688079  | 2.172911  | 0.140836  | C | 3.411223  | 3.574498  | 3.019093 |
| C | 6.685387  | -2.178127 | -4.182891 | C | 4.689399  | 3.528266  | 3.563541 |
| C | 5.231459  | -4.697818 | -4.180544 | C | 5.402326  | 2.293366  | 3.564288 |
| C | 1.461910  | -6.870553 | 0.149333  | C | 4.803338  | 1.163259  | 3.020102 |
| C | -1.461645 | -6.870563 | 0.149408  | C | -1.389796 | 4.781964  | 1.084830 |
| C | -5.231401 | -4.697438 | -4.181032 | C | -0.712663 | 5.850240  | 0.511233 |
| C | -6.685515 | -2.177856 | -4.182450 | C | 0.712437  | 5.850241  | 0.511190 |
| C | -6.687985 | 2.172734  | 0.140832  | C | 1.389610  | 4.781979  | 1.084765 |
| C | -5.228345 | 4.706373  | 0.138038  | C | -4.803344 | 1.163349  | 3.020489 |
| N | 2.077161  | 7.719782  | -4.693476 | C | -5.402295 | 2.293555  | 3.564514 |
| N | -2.077108 | 7.719765  | -4.693467 | C | -4.689459 | 3.528505  | 3.563316 |
| N | -5.584284 | 5.650554  | 0.715059  | C | -3.411344 | 3.574653  | 3.018729 |
| N | -7.682920 | 2.007741  | 0.718785  | C | -3.452357 | -3.598881 | 1.090304 |
| N | -7.719736 | -2.055815 | -4.697345 | C | -4.718133 | -3.547036 | 0.520938 |
| N | -5.643503 | -5.654102 | -4.695426 | C | -5.429691 | -2.312281 | 0.519517 |
| N | -2.100979 | -7.650430 | 0.727507  | C | -4.840068 | -1.191097 | 1.088599 |
| N | 2.101271  | -7.650416 | 0.727410  | C | 1.391845  | -4.746182 | 3.018765 |
| N | 5.643557  | -5.654600 | -4.694724 | C | 0.712851  | -5.830552 | 3.562035 |
| N | 7.719526  | -2.056155 | -4.697968 | C | -0.712925 | -5.830560 | 3.562033 |
| N | 7.683018  | 2.007981  | 0.718799  | C | -1.391931 | -4.746197 | 3.018764 |
| N | 5.584357  | 5.650746  | 0.714863  | C | 4.839939  | -1.191004 | 1.088610 |
| C | 0.715807  | 3.657111  | 1.603724  | C | 5.429604  | -2.312161 | 0.519517 |
| C | -0.715947 | 3.657098  | 1.603716  | C | 4.718073  | -3.546933 | 0.520901 |
| C | -1.425776 | 2.462490  | 1.995788  | C | 3.452304  | -3.598837 | 1.090283 |

|                          |           |           |           |   |           |           |          |
|--------------------------|-----------|-----------|-----------|---|-----------|-----------|----------|
| H                        | 2.856099  | 4.498080  | 3.118194  | C | -2.839552 | 0.002765  | 2.682476 |
| H                        | 5.325420  | 0.220707  | 3.119373  | C | -3.500116 | -1.185796 | 2.190802 |
| H                        | -2.469383 | 4.792731  | 1.053726  | C | -2.779963 | -2.433092 | 2.190516 |
| H                        | 2.469193  | 4.792792  | 1.053645  | C | -1.420150 | -2.455972 | 2.681594 |
| H                        | -5.325372 | 0.220809  | 3.120105  | C | -0.720663 | -3.606785 | 3.207944 |
| H                        | -2.856246 | 4.498292  | 3.117486  | C | 0.720640  | -3.606787 | 3.207932 |
| H                        | -2.922533 | -4.539390 | 1.056865  | C | 1.420126  | -2.455975 | 2.681586 |
| H                        | -5.386369 | -0.260166 | 1.054696  | C | 2.779941  | -2.433095 | 2.190515 |
| H                        | 2.469036  | -4.726828 | 3.119205  | C | 3.500094  | -1.185801 | 2.190798 |
| H                        | -2.469122 | -4.726854 | 3.119203  | C | 2.839532  | 0.002762  | 2.682471 |
| H                        | 5.386176  | -0.260034 | 1.054726  | C | 3.485744  | 1.183755  | 3.210351 |
| H                        | 2.922538  | -4.539377 | 1.056859  | C | 2.765506  | 2.432301  | 3.208659 |
| C                        | -1.461910 | 6.870553  | -0.149333 | C | 1.419672  | 2.463121  | 2.680236 |
| C                        | 1.461645  | 6.870563  | -0.149408 | C | 0.716591  | 1.244385  | 2.659086 |
| C                        | 5.231401  | 4.697438  | 4.181032  | C | -0.716610 | 1.244386  | 2.659089 |
| C                        | 6.685515  | 2.177856  | 4.182450  | C | -1.432842 | 0.003503  | 2.659488 |
| C                        | 6.687985  | -2.172734 | -0.140832 | C | -0.716260 | -1.237841 | 2.658966 |
| C                        | 5.228345  | -4.706373 | -0.138038 | C | 0.716239  | -1.237842 | 2.658964 |
| C                        | 1.454555  | -6.884570 | 4.179172  | C | 1.432822  | 0.003502  | 2.659485 |
| C                        | -1.454619 | -6.884583 | 4.179175  | C | 3.329607  | 3.528679  | 3.898355 |
| C                        | -5.228395 | -4.706519 | -0.137933 | C | 4.574074  | 3.454279  | 4.503983 |
| C                        | -6.688079 | -2.172911 | -0.140836 | C | 5.274734  | 2.238328  | 4.506313 |
| C                        | -6.685387 | 2.178127  | 4.182891  | C | 4.715999  | 1.123294  | 3.901872 |
| C                        | -5.231459 | 4.697818  | 4.180544  | C | -1.388221 | 4.702305  | 1.560779 |
| N                        | 2.100979  | 7.650430  | -0.727507 | C | -0.701828 | 5.761176  | 0.987691 |
| N                        | -2.101271 | 7.650416  | -0.727410 | C | 0.701813  | 5.761174  | 0.987691 |
| N                        | -5.643557 | 5.654600  | 4.694724  | C | 1.388205  | 4.702303  | 1.560779 |
| N                        | -7.719526 | 2.056155  | 4.697968  | C | -4.716022 | 1.123290  | 3.901870 |
| N                        | -7.683018 | -2.007981 | -0.718799 | C | -5.274754 | 2.238315  | 4.506328 |
| N                        | -5.584357 | -5.650746 | -0.714863 | C | -4.574081 | 3.454260  | 4.504034 |
| N                        | -2.077161 | -7.719782 | 4.693476  | C | -3.329610 | 3.528663  | 3.898415 |
| N                        | 2.077108  | -7.719765 | 4.693467  | C | -3.374765 | -3.547284 | 1.560661 |
| N                        | 5.584284  | -5.650554 | -0.715059 | C | -4.634495 | -3.481652 | 0.986305 |
| N                        | 7.682920  | -2.007741 | -0.718785 | C | -5.336441 | -2.266225 | 0.987071 |
| N                        | 7.719736  | 2.055815  | 4.697345  | C | -4.763034 | -1.143114 | 1.562186 |
| N                        | 5.643503  | 5.654102  | 4.695426  | C | 1.388185  | -4.645593 | 3.894554 |
|                          |           |           |           | C | 0.701712  | -5.689330 | 4.494562 |
|                          |           |           |           | C | -0.701716 | -5.689322 | 4.494583 |
|                          |           |           |           | C | -1.388198 | -4.645581 | 3.894592 |
|                          |           |           |           | C | 4.763010  | -1.143122 | 1.562177 |
|                          |           |           |           | C | 5.336418  | -2.266236 | 0.987069 |
|                          |           |           |           | C | 4.634475  | -3.481664 | 0.986316 |
|                          |           |           |           | C | 3.374743  | -3.547291 | 1.560668 |
|                          |           |           |           | F | 2.630741  | 4.663870  | 4.091229 |
|                          |           |           |           | F | 5.078449  | 4.504968  | 5.160693 |
| 144                      |           |           |           |   |           |           |          |
| F substituted homodimers |           |           |           |   |           |           |          |
| C                        | 0.720076  | 3.629207  | 2.188663  |   |           |           |          |
| C                        | -0.720095 | 3.629210  | 2.188668  |   |           |           |          |
| C                        | -1.419690 | 2.463123  | 2.680247  |   |           |           |          |
| C                        | -2.765517 | 2.432300  | 3.208688  |   |           |           |          |
| C                        | -3.485759 | 1.183757  | 3.210361  |   |           |           |          |

|   |           |           |           |   |           |           |           |
|---|-----------|-----------|-----------|---|-----------|-----------|-----------|
| F | 6.435440  | 2.149314  | 5.165307  | C | 1.432842  | -0.003503 | -2.659488 |
| F | 5.347671  | -0.050373 | 4.096821  | C | 3.374765  | 3.547284  | -1.560661 |
| F | -2.726475 | 4.692469  | 1.416789  | C | 4.634495  | 3.481652  | -0.986305 |
| F | -1.357516 | 6.757138  | 0.383510  | C | 5.336441  | 2.266225  | -0.987071 |
| F | 1.357502  | 6.757136  | 0.383509  | C | 4.763034  | 1.143114  | -1.562186 |
| F | 2.726458  | 4.692463  | 1.416788  | C | -1.388185 | 4.645593  | -3.894554 |
| F | -5.347708 | -0.050377 | 4.096779  | C | -0.701712 | 5.689330  | -4.494562 |
| F | -6.435468 | 2.149298  | 5.165308  | C | 0.701716  | 5.689322  | -4.494583 |
| F | -5.078451 | 4.504937  | 5.160766  | C | 1.388198  | 4.645581  | -3.894592 |
| F | -2.630734 | 4.663842  | 4.091327  | C | -4.763010 | 1.143122  | -1.562177 |
| F | -2.696527 | -4.700505 | 1.413316  | C | -5.336418 | 2.266236  | -0.987069 |
| F | -5.167814 | -4.546730 | 0.379553  | C | -4.634475 | 3.481664  | -0.986316 |
| F | -6.526329 | -2.195225 | 0.382209  | C | -3.374743 | 3.547291  | -1.560668 |
| F | -5.423834 | 0.020647  | 1.418420  | C | -3.329607 | -3.528679 | -3.898355 |
| F | 2.720749  | -4.607660 | 4.088100  | C | -4.574074 | -3.454279 | -4.503983 |
| F | 1.359119  | -6.653969 | 5.147788  | C | -5.274734 | -2.238328 | -4.506313 |
| F | -1.359114 | -6.653954 | 5.147832  | C | -4.715999 | -1.123294 | -3.901872 |
| F | -2.720754 | -4.607634 | 4.088187  | C | 1.388221  | -4.702305 | -1.560779 |
| F | 5.423808  | 0.020640  | 1.418403  | C | 0.701828  | -5.761176 | -0.987691 |
| F | 6.526306  | -2.195238 | 0.382207  | C | -0.701813 | -5.761174 | -0.987691 |
| F | 5.167796  | -4.546749 | 0.379578  | C | -1.388205 | -4.702303 | -1.560779 |
| F | 2.696503  | -4.700511 | 1.413327  | C | 4.716022  | -1.123290 | -3.901870 |
| C | 0.720663  | 3.606785  | -3.207944 | C | 5.274754  | -2.238315 | -4.506328 |
| C | -0.720640 | 3.606787  | -3.207932 | C | 4.574081  | -3.454260 | -4.504034 |
| C | -1.420126 | 2.455975  | -2.681586 | C | 3.329610  | -3.528663 | -3.898415 |
| C | -2.779941 | 2.433095  | -2.190515 | F | 2.696527  | 4.700505  | -1.413316 |
| C | -3.500094 | 1.185801  | -2.190798 | F | 5.167814  | 4.546730  | -0.379553 |
| C | -2.839532 | -0.002762 | -2.682471 | F | 6.526329  | 2.195225  | -0.382209 |
| C | -3.485744 | -1.183755 | -3.210351 | F | 5.423834  | -0.020647 | -1.418420 |
| C | -2.765506 | -2.432301 | -3.208659 | F | -2.720749 | 4.607660  | -4.088100 |
| C | -1.419672 | -2.463121 | -2.680236 | F | -1.359119 | 6.653969  | -5.147788 |
| C | -0.720076 | -3.629207 | -2.188663 | F | 1.359114  | 6.653954  | -5.147832 |
| C | 0.720095  | -3.629210 | -2.188668 | F | 2.720754  | 4.607634  | -4.088187 |
| C | 1.419690  | -2.463123 | -2.680247 | F | -5.423808 | -0.020640 | -1.418403 |
| C | 2.765517  | -2.432300 | -3.208688 | F | -6.526306 | 2.195238  | -0.382207 |
| C | 3.485759  | -1.183757 | -3.210361 | F | -5.167796 | 4.546749  | -0.379578 |
| C | 2.839552  | -0.002765 | -2.682476 | F | -2.696503 | 4.700511  | -1.413327 |
| C | 3.500116  | 1.185796  | -2.190802 | F | -2.630741 | -4.663870 | -4.091229 |
| C | 2.779963  | 2.433092  | -2.190516 | F | -5.078449 | -4.504968 | -5.160693 |
| C | 1.420150  | 2.455972  | -2.681594 | F | -6.435440 | -2.149314 | -5.165307 |
| C | 0.716260  | 1.237841  | -2.658966 | F | -5.347671 | 0.050373  | -4.096821 |
| C | -0.716239 | 1.237842  | -2.658964 | F | 2.726475  | -4.692469 | -1.416789 |
| C | -1.432822 | -0.003502 | -2.659485 | F | 1.357516  | -6.757138 | -0.383510 |
| C | -0.716591 | -1.244385 | -2.659086 | F | -1.357502 | -6.757136 | -0.383509 |
| C | 0.716610  | -1.244386 | -2.659089 | F | -2.726458 | -4.692463 | -1.416788 |



|   |          |           |           |   |           |           |           |
|---|----------|-----------|-----------|---|-----------|-----------|-----------|
| F | 5.347708 | 0.050377  | -4.096779 | C | -4.689798 | -3.533603 | -3.404547 |
| F | 6.435468 | -2.149298 | -5.165308 | C | -5.392584 | -2.316136 | -3.407977 |
| F | 5.078451 | -4.504937 | -5.160766 | C | -4.806246 | -1.179928 | -2.901810 |
| F | 2.630734 | -4.663842 | -4.091327 | C | 1.388647  | -4.845778 | -1.060218 |
|   |          |           |           | C | 0.701619  | -5.941717 | -0.594354 |
|   |          |           |           | C | -0.701501 | -5.941706 | -0.594309 |
|   |          |           |           | C | -1.388540 | -4.845757 | -1.060129 |
|   |          |           |           | C | 4.806358  | -1.179933 | -2.901800 |
|   |          |           |           | C | 5.392704  | -2.316138 | -3.407964 |
|   |          |           |           | C | 4.689906  | -3.533599 | -3.404580 |
|   |          |           |           | C | 3.413693  | -3.591934 | -2.895784 |
|   |          |           |           | H | 2.985399  | 4.553684  | -0.997684 |
|   |          |           |           | H | 5.446778  | 0.280369  | -1.019075 |
|   |          |           |           | H | -2.466396 | 4.739004  | -3.002480 |
|   |          |           |           | H | 2.466388  | 4.738968  | -3.002799 |
|   |          |           |           | H | -5.446663 | 0.280411  | -1.018824 |
|   |          |           |           | H | -2.985249 | 4.553704  | -0.997679 |
|   |          |           |           | H | -2.871917 | -4.520215 | -3.020235 |
|   |          |           |           | H | -5.339280 | -0.247304 | -3.030878 |
|   |          |           |           | H | 2.466264  | -4.875772 | -1.011120 |
|   |          |           |           | H | -2.466155 | -4.875725 | -1.010964 |
|   |          |           |           | H | 5.339410  | -0.247310 | -3.030808 |
|   |          |           |           | H | 2.872013  | -4.520213 | -3.020315 |
|   |          |           |           | C | 0.715137  | 3.686475  | 1.512523  |
|   |          |           |           | C | -0.715232 | 3.686481  | 1.512561  |
|   |          |           |           | C | -1.424368 | 2.478313  | 1.870255  |
|   |          |           |           | C | -2.797805 | 2.454055  | 2.316961  |
|   |          |           |           | C | -3.514219 | 1.213303  | 2.319798  |
|   |          |           |           | C | -2.849552 | 0.010879  | 1.873373  |
|   |          |           |           | C | -3.542956 | -1.206735 | 1.517585  |
|   |          |           |           | C | -2.828230 | -2.445482 | 1.510475  |
|   |          |           |           | C | -1.425175 | -2.457376 | -2.445482 |
|   |          |           |           | C | 0.719779  | 1.236914  | -1.861143 |
|   |          |           |           | C | -0.719684 | 1.236913  | -1.803694 |
|   |          |           |           | C | -1.440007 | -0.011092 | -1.803666 |
|   |          |           |           | C | -1.440007 | -0.011092 | -1.809076 |
|   |          |           |           | C | -0.720284 | -1.257115 | -1.809709 |
|   |          |           |           | C | -0.720375 | -1.257117 | -1.809733 |
|   |          |           |           | C | 1.440097  | -0.011094 | -1.809733 |
|   |          |           |           | C | 1.440097  | -0.011094 | -1.809123 |
|   |          |           |           | C | 3.498143  | 3.606074  | -1.056108 |
|   |          |           |           | C | 4.793776  | 3.557489  | -1.056108 |
|   |          |           |           | C | 5.494892  | 2.342062  | -0.598801 |
|   |          |           |           | C | 4.885499  | 1.200542  | -0.605939 |
|   |          |           |           | C | -1.392222 | 4.743352  | -1.070202 |
|   |          |           |           | C | -0.702812 | 5.822856  | -2.873944 |
|   |          |           |           | C | 0.702775  | 5.822840  | -3.374077 |
|   |          |           |           | C | 1.392234  | 4.743331  | -3.374173 |
|   |          |           |           | C | -4.885376 | 1.200572  | -2.874114 |
|   |          |           |           | C | -5.494740 | 2.342111  | -1.070008 |
|   |          |           |           | C | -4.793624 | 3.557537  | -0.605750 |
|   |          |           |           | C | -3.498011 | 3.606100  | -0.598695 |
|   |          |           |           | C | -3.413599 | -3.591935 | -1.056058 |
|   |          |           |           | C |           |           | -2.895721 |
|   |          |           |           | C | -4.689798 | -3.533603 | -3.404547 |
|   |          |           |           | C | -5.392584 | -2.316136 | -3.407977 |
|   |          |           |           | C | -4.806246 | -1.179928 | -2.901810 |
|   |          |           |           | C | 1.388647  | -4.845778 | -1.060218 |
|   |          |           |           | C | 0.701619  | -5.941717 | -0.594354 |
|   |          |           |           | C | -0.701501 | -5.941706 | -0.594309 |
|   |          |           |           | C | -1.388540 | -4.845757 | -1.060129 |
|   |          |           |           | C | 4.806358  | -1.179933 | -2.901800 |
|   |          |           |           | C | 5.392704  | -2.316138 | -3.407964 |
|   |          |           |           | C | 4.689906  | -3.533599 | -3.404580 |
|   |          |           |           | C | 3.413693  | -3.591934 | -2.895784 |
|   |          |           |           | H | 2.985399  | 4.553684  | -0.997684 |
|   |          |           |           | H | 5.446778  | 0.280369  | -1.019075 |
|   |          |           |           | H | -2.466396 | 4.739004  | -3.002480 |
|   |          |           |           | H | 2.466388  | 4.738968  | -3.002799 |
|   |          |           |           | H | -5.446663 | 0.280411  | -1.018824 |
|   |          |           |           | H | -2.985249 | 4.553704  | -0.997679 |
|   |          |           |           | H | -2.871917 | -4.520215 | -3.020235 |
|   |          |           |           | H | -5.339280 | -0.247304 | -3.030878 |
|   |          |           |           | H | 2.466264  | -4.875772 | -1.011120 |
|   |          |           |           | H | -2.466155 | -4.875725 | -1.010964 |
|   |          |           |           | H | 5.339410  | -0.247310 | -3.030808 |
|   |          |           |           | H | 2.872013  | -4.520213 | -3.020315 |
|   |          |           |           | C | 0.715137  | 3.686475  | 1.512523  |
|   |          |           |           | C | -0.715232 | 3.686481  | 1.512561  |
|   |          |           |           | C | -1.424368 | 2.478313  | 1.870255  |
|   |          |           |           | C | -2.797805 | 2.454055  | 2.316961  |
|   |          |           |           | C | -3.514219 | 1.213303  | 2.319798  |
|   |          |           |           | C | -2.849552 | 0.010879  | 1.873373  |
|   |          |           |           | C | -3.542956 | -1.206735 | 1.517585  |
|   |          |           |           | C | -2.828230 | -2.445482 | 1.510475  |
|   |          |           |           | C | -1.425175 | -2.457376 | -2.445482 |
|   |          |           |           | C | -0.716508 | -3.637561 | -1.861143 |
|   |          |           |           | C | 0.716437  | -3.637564 | 2.299567  |
|   |          |           |           | C | 1.425078  | -2.457373 | 2.299509  |
|   |          |           |           | C | 2.828122  | -2.445485 | 1.861078  |
|   |          |           |           | C | 3.542856  | -1.206742 | 1.510393  |
|   |          |           |           | C | 2.849466  | -1.206742 | 1.517467  |
|   |          |           |           | C | 3.514132  | 0.010876  | 1.873294  |
|   |          |           |           | C | 2.797721  | 1.213297  | 1.873294  |
|   |          |           |           | C | 1.424281  | 2.454051  | 2.319746  |
|   |          |           |           | C | 0.720284  | 2.454051  | 2.316897  |
|   |          |           |           | C | -0.720375 | 2.478307  | 2.454051  |
|   |          |           |           | C | -1.440097 | 1.257115  | 2.478307  |
|   |          |           |           | C | -0.719779 | 1.257117  | 1.257115  |
|   |          |           |           | C |           | 0.011094  | 1.809709  |
|   |          |           |           | C |           |           | 1.809733  |
|   |          |           |           | C |           |           | 1.809123  |
|   |          |           |           | C |           |           | 1.803694  |

|   |           |           |           |                          |           |           |           |
|---|-----------|-----------|-----------|--------------------------|-----------|-----------|-----------|
| C | 0.719684  | -1.236913 | 1.803666  | F                        | -6.749268 | 2.290491  | -0.114193 |
| C | 1.440007  | 0.011092  | 1.809076  | F                        | -1.364875 | 6.854567  | -3.930748 |
| C | 3.413599  | 3.591935  | 2.895721  | F                        | 1.364784  | 6.854537  | -3.930935 |
| C | 4.689798  | 3.533603  | 3.404547  | F                        | 1.370377  | 7.003043  | 0.100310  |
| C | 5.392584  | 2.316136  | 3.407977  | F                        | -1.370510 | 7.003065  | 0.100398  |
| C | 4.806246  | 1.179928  | 2.901810  | F                        | 6.749444  | 2.290423  | -0.114446 |
| C | -1.388647 | 4.845778  | 1.060218  | F                        | 5.380908  | 4.665088  | -0.102154 |
| C | -0.701619 | 5.941717  | 0.594354  | F                        | 6.613392  | 2.257919  | 3.972745  |
| C | 0.701501  | 5.941706  | 0.594309  | F                        | 5.248874  | 4.622214  | 3.965949  |
| C | 1.388540  | 4.845757  | 1.060129  | F                        | 6.613536  | -2.257924 | -3.972682 |
| C | -4.806358 | 1.179933  | 2.901800  | F                        | 5.248994  | -4.622207 | -3.965975 |
| C | -5.392704 | 2.316138  | 3.407964  | F                        | 6.749268  | -2.290491 | 0.114193  |
| C | -4.689906 | 3.533599  | 3.404580  | F                        | 5.380726  | -4.665156 | 0.102055  |
| C | -3.413693 | 3.591934  | 2.895784  | F                        | 1.364875  | -6.854567 | 3.930748  |
| C | -3.498143 | -3.606074 | 1.056108  | F                        | 1.370510  | -7.003065 | -0.100398 |
| C | -4.793776 | -3.557489 | 0.598801  | F                        | -1.364784 | -6.854537 | 3.930935  |
| C | -5.494892 | -2.342062 | 0.605939  | F                        | -1.370377 | -7.003043 | -0.100310 |
| C | -4.885499 | -1.200542 | 1.070202  |                          |           |           |           |
| C | 1.392222  | -4.743352 | 2.873944  |                          |           |           |           |
| C | 0.702812  | -5.822856 | 3.374077  |                          |           |           |           |
| C | -0.702775 | -5.822840 | 3.374173  | 144                      |           |           |           |
| C | -1.392234 | -4.743331 | 2.874114  | H substituted homodimers |           |           |           |
| C | 4.885376  | -1.200572 | 1.070008  | C                        | 0.716629  | 3.634579  | -2.337889 |
| C | 5.494740  | -2.342111 | 0.605750  | C                        | -0.716576 | 3.634584  | -2.337809 |
| C | 4.793624  | -3.557537 | 0.598695  | C                        | -1.424842 | 2.465019  | -1.868112 |
| C | 3.498011  | -3.606100 | 1.056058  | C                        | -2.829766 | 2.458082  | -1.522260 |
| H | 2.871917  | 4.520215  | 3.020235  | C                        | -3.544780 | 1.219070  | -1.523586 |
| H | 5.339280  | 0.247304  | 3.030878  | C                        | -2.848083 | -0.000046 | -1.871418 |
| H | -2.466264 | 4.875772  | 1.011120  | C                        | -3.506071 | -1.197924 | -2.342824 |
| H | 2.466155  | 4.875725  | 1.010964  | C                        | -2.789476 | -2.438947 | -2.341642 |
| H | -5.339410 | 0.247310  | 3.030808  | C                        | -1.423136 | -2.467838 | -1.870217 |
| H | -2.872013 | 4.520213  | 3.020315  | C                        | -0.715369 | -3.680213 | -1.520924 |
| H | -2.985399 | -4.553684 | 0.997684  | C                        | 0.715447  | -3.680218 | -1.520947 |
| H | -5.446778 | -0.280369 | 1.019075  | C                        | 1.423210  | -2.467844 | -1.870258 |
| H | 2.466396  | -4.739004 | 3.002480  | C                        | 2.789544  | -2.438951 | -2.341700 |
| H | -2.466388 | -4.738968 | 3.002799  | C                        | 3.506143  | -1.197930 | -2.342873 |
| H | 5.446663  | -0.280411 | 1.018824  | C                        | 2.848159  | -0.000049 | -1.871484 |
| H | 2.985249  | -4.553704 | 0.997679  | C                        | 3.544867  | 1.219061  | -1.523672 |
| F | -5.380908 | -4.665088 | 0.102154  | C                        | 2.829862  | 2.458081  | -1.522322 |
| F | -5.248874 | -4.622214 | -3.965949 | C                        | 1.424931  | 2.465025  | -1.868186 |
| F | -6.613392 | -2.257919 | -3.972745 | C                        | 0.719639  | 1.246434  | -1.793904 |
| F | -6.749444 | -2.290423 | 0.114446  | C                        | 0.719639  | 1.246434  | -1.793904 |
| F | -5.248994 | 4.622207  | 3.965975  | C                        | -0.719551 | 1.246431  | -1.793878 |
| F | -6.613536 | 2.257924  | 3.972682  | C                        | -1.440076 | -0.001556 | -1.795896 |
| F | -5.380726 | 4.665156  | -0.102055 | C                        | -0.720453 | -1.247545 | -1.796236 |
|   |           |           |           | C                        | 0.720532  | -1.247547 | -1.796255 |
|   |           |           |           | C                        | 1.440155  | -0.001558 | -1.795936 |

|   |           |           |           |   |           |           |          |
|---|-----------|-----------|-----------|---|-----------|-----------|----------|
| C | 3.506575  | 3.622677  | -1.085026 | C | -0.716629 | -3.634579 | 2.337889 |
| C | 4.820239  | 3.589833  | -0.656139 | C | 0.716576  | -3.634584 | 2.337809 |
| C | 5.522035  | 2.373612  | -0.657135 | C | 1.424842  | -2.465019 | 1.868112 |
| C | 4.892195  | 1.220712  | -1.087117 | C | 2.829766  | -2.458082 | 1.522260 |
| C | -1.388850 | 4.720144  | -2.956741 | C | 3.544780  | -1.219070 | 1.523586 |
| C | -0.702887 | 5.784440  | -3.511052 | C | 2.848083  | 0.000046  | 1.871418 |
| C | 0.702770  | 5.784412  | -3.511192 | C | 3.506071  | 1.197924  | 2.342824 |
| C | 1.388809  | 4.720107  | -2.956988 | C | 2.789476  | 2.438947  | 2.341642 |
| C | -4.892094 | 1.220748  | -1.086990 | C | 1.423136  | 2.467838  | 1.870217 |
| C | -5.521912 | 2.373669  | -0.657029 | C | 0.720453  | 1.247545  | 1.796236 |
| C | -4.820113 | 3.589890  | -0.656112 | C | -0.720532 | 1.247547  | 1.796255 |
| C | -3.506459 | 3.622708  | -1.085029 | C | -1.440155 | 0.001558  | 1.795936 |
| C | -3.392648 | -3.564255 | -2.960720 | C | -0.719639 | -1.246434 | 1.793904 |
| C | -4.655913 | -3.501621 | -3.518412 | C | 0.719551  | -1.246431 | 1.793878 |
| C | -5.358372 | -2.283920 | -3.520746 | C | 1.440076  | 0.001556  | 1.795896 |
| C | -4.781249 | -1.157964 | -2.964019 | C | 3.392648  | 3.564255  | 2.960720 |
| C | 1.386475  | -4.847750 | -1.083093 | C | 4.655913  | 3.501621  | 3.518412 |
| C | 0.702056  | -5.967943 | -0.650097 | C | 5.358372  | 2.283920  | 3.520746 |
| C | -0.701978 | -5.967935 | -0.650076 | C | 4.781249  | 1.157964  | 2.964019 |
| C | -1.386397 | -4.847734 | -1.083050 | C | -1.386475 | 4.847750  | 1.083093 |
| C | 4.781338  | -1.157971 | -2.964028 | C | -0.702056 | 5.967943  | 0.650097 |
| C | 5.358464  | -2.283924 | -3.520756 | C | 0.701978  | 5.967935  | 0.650076 |
| C | 4.655991  | -3.501617 | -3.518460 | C | 1.386397  | 4.847734  | 1.083050 |
| C | 3.392716  | -3.564251 | -2.960791 | C | -4.781338 | 1.157971  | 2.964028 |
| H | 2.958136  | 4.551715  | -1.029567 | C | -5.358464 | 2.283924  | 3.520756 |
| H | 5.420257  | 0.279978  | -1.030891 | C | -4.655991 | 3.501617  | 3.518460 |
| H | -2.465781 | 4.681637  | -3.061931 | C | -3.392716 | 3.564251  | 2.960791 |
| H | 2.465714  | 4.681575  | -3.062406 | C | -3.506575 | -3.622677 | 1.085026 |
| H | -5.420169 | 0.280026  | -1.030723 | C | -4.820239 | -3.589833 | 0.656139 |
| H | -2.957998 | 4.551739  | -1.029620 | C | -5.522035 | -2.373612 | 0.657135 |
| H | -2.821420 | -4.478408 | -3.063411 | C | -4.892195 | -1.220712 | 1.087117 |
| H | -5.286436 | -0.206023 | -3.068896 | C | 1.388850  | -4.720144 | 2.956741 |
| H | 2.465479  | -4.837203 | -1.031003 | C | 0.702887  | -5.784440 | 3.511052 |
| H | -2.465399 | -4.837166 | -1.030928 | C | -0.702770 | -5.784412 | 3.511192 |
| H | 5.286539  | -0.206031 | -3.068868 | C | -1.388809 | -4.720107 | 2.956988 |
| H | 2.821485  | -4.478399 | -3.063507 | C | 4.892094  | -1.220748 | 1.086990 |
| C | 0.715369  | 3.680213  | 1.520924  | C | 5.521912  | -2.373669 | 0.657029 |
| C | -0.715447 | 3.680218  | 1.520947  | C | 4.820113  | -3.589890 | 0.656112 |
| C | -1.423210 | 2.467844  | 1.870258  | C | 3.506459  | -3.622708 | 1.085029 |
| C | -2.789544 | 2.438951  | 2.341700  | H | 2.821420  | 4.478408  | 3.063411 |
| C | -3.506143 | 1.197930  | 2.342873  | H | 5.286436  | 0.206023  | 3.068896 |
| C | -2.848159 | 0.000049  | 1.871484  | H | -2.465479 | 4.837203  | 1.031003 |
| C | -3.544867 | -1.219061 | 1.523672  | H | 2.465399  | 4.837166  | 1.030928 |
| C | -2.829862 | -2.458081 | 1.522322  | H | -5.286539 | 0.206031  | 3.068868 |
| C | -1.424931 | -2.465025 | 1.868186  | H | -2.821485 | 4.478399  | 3.063507 |

|                            |           |           |           |   |           |           |           |
|----------------------------|-----------|-----------|-----------|---|-----------|-----------|-----------|
| H                          | -2.958136 | -4.551715 | 1.029567  | C | 2.326103  | -1.648492 | -1.963919 |
| H                          | -5.420257 | -0.279978 | 1.030891  | C | 3.584770  | -1.044835 | -2.337256 |
| H                          | 2.465781  | -4.681637 | 3.061931  | C | 3.715407  | 0.380013  | -2.310265 |
| H                          | -2.465714 | -4.681575 | 3.062406  | C | 2.591776  | 1.195503  | -1.919845 |
| H                          | 5.420169  | -0.280026 | 1.030723  | C | 2.710985  | 2.583376  | -1.535011 |
| H                          | 2.957998  | -4.551739 | 1.029620  | C | 1.560370  | 3.428703  | -1.595528 |
| H                          | 5.076075  | 4.378713  | 4.003987  | C | 0.275453  | 2.858256  | -1.947326 |
| H                          | 6.326955  | 2.209655  | 4.008488  | C | 0.135595  | 1.449061  | -1.912227 |
| H                          | 6.542755  | -2.328184 | 0.287268  | C | -1.172688 | 0.845300  | -1.901007 |
| H                          | 5.291954  | -4.496102 | 0.285859  | C | -1.307506 | -0.589222 | -1.937787 |
| H                          | 5.076153  | -4.378704 | -4.004042 | C | -0.134071 | -1.424190 | -1.932334 |
| H                          | 6.327060  | -2.209661 | -4.008468 | C | 1.176523  | -0.824247 | -1.930270 |
| H                          | 1.251427  | -6.828797 | -0.278585 | C | 1.307934  | 0.609973  | -1.918632 |
| H                          | -1.251347 | -6.828782 | -0.278544 | C | 1.719815  | 4.759954  | -1.143124 |
| H                          | -5.076075 | -4.378713 | -4.003987 | C | 2.891019  | 5.256436  | -0.595144 |
| H                          | -6.326955 | -2.209655 | -4.008488 | C | 4.024400  | 4.406327  | -0.512807 |
| H                          | -5.292094 | -4.496025 | 0.285856  | C | 3.901179  | 3.111996  | -0.991647 |
| H                          | -6.542887 | -2.328104 | 0.287402  | C | -3.290565 | 3.816594  | -2.681446 |
| H                          | 1.252085  | -6.587635 | 3.995643  | C | -3.188389 | 5.144715  | -3.056249 |
| H                          | -1.251899 | -6.587583 | 3.995896  | C | -1.905286 | 5.746066  | -3.079023 |
| H                          | -1.251427 | 6.828797  | 0.278585  | C | -0.797274 | 4.967306  | -2.784885 |
| H                          | 1.251347  | 6.828782  | 0.278544  | C | -4.944519 | -0.935463 | -1.173260 |
| H                          | -1.252085 | 6.587635  | -3.995643 | C | -5.960943 | -0.219671 | -0.563140 |
| H                          | 1.251899  | 6.587583  | -3.995896 | C | -5.812243 | 1.188726  | -0.434730 |
| H                          | -5.291954 | 4.496102  | -0.285859 | C | -4.650168 | 1.773503  | -0.919859 |
| H                          | -6.542755 | 2.328184  | -0.287268 | C | -1.648009 | -4.719125 | -2.828292 |
| H                          | -6.327060 | 2.209661  | 4.008468  | C | -2.846900 | -5.275310 | -3.240719 |
| H                          | -5.076153 | 4.378704  | 4.004042  | C | -4.003187 | -4.454278 | -3.270991 |
| H                          | 6.542887  | 2.328104  | -0.287402 | C | -3.879617 | -3.116693 | -2.928079 |
| H                          | 5.292094  | 4.496025  | -0.285856 | C | 3.250694  | -3.816429 | -1.102863 |
|                            |           |           |           | C | 3.101358  | -5.065128 | -0.537603 |
|                            |           |           |           | C | 1.806183  | -5.637505 | -0.466235 |
|                            |           |           |           | C | 0.738625  | -4.918339 | -0.989050 |
| 192                        |           |           |           | C | 4.919970  | 0.943771  | -2.793786 |
| NH2 substituted homodimers |           |           |           | C | 6.021155  | 0.186222  | -3.151957 |
| C                          | -0.887741 | 3.642402  | -2.299994 | C | 5.912814  | -1.227059 | -3.118096 |
| C                          | -2.189331 | 3.047529  | -2.237116 | C | 4.689045  | -1.795045 | -2.802940 |
| C                          | -2.327640 | 1.659085  | -1.871164 | H | 0.854394  | 5.403624  | -1.094958 |
| C                          | -3.586128 | 1.048586  | -1.500985 | H | 4.756711  | 2.461274  | -0.884915 |
| C                          | -3.731531 | -0.367587 | -1.616799 | H | -4.261481 | 3.341919  | -2.773409 |
| C                          | -2.594141 | -1.173715 | -2.000928 | H | 0.178811  | 5.407386  | -2.951372 |
| C                          | -2.692037 | -2.558272 | -2.403270 | H | -5.053345 | -2.007452 | -1.166391 |
| C                          | -1.531622 | -3.393474 | -2.347577 | H | -4.531644 | 2.837094  | -0.769330 |
| C                          | -0.268147 | -2.830370 | -1.940945 | H | -0.754909 | -5.328997 | -2.914953 |
| C                          | 0.873761  | -3.625527 | -1.542591 | H | -4.740168 | -2.477345 | -3.088206 |
| C                          | 2.175859  | -3.038336 | -1.589044 |   |           |           |           |

|   |           |           |           |   |           |           |          |
|---|-----------|-----------|-----------|---|-----------|-----------|----------|
| H | 4.238686  | -3.391619 | -1.059804 | C | -2.693549 | -0.937439 | 1.952430 |
| H | -0.253172 | -5.334746 | -0.881190 | C | -2.943491 | -2.311945 | 1.575285 |
| H | 4.986537  | 2.019366  | -2.918550 | C | -1.859230 | -3.241358 | 1.515895 |
| H | 4.591836  | -2.866415 | -2.931253 | C | -0.537465 | -2.801808 | 1.910135 |
| N | -1.752511 | 7.133059  | -3.325842 | C | 0.515686  | -3.698718 | 2.318136 |
| H | -0.841191 | 7.362941  | -3.704370 | C | 1.863234  | -3.221676 | 2.382505 |
| H | -2.479024 | 7.552838  | -3.890527 | C | 2.159312  | -1.864083 | 1.984465 |
| N | -4.343040 | 5.914395  | -3.365332 | C | 3.479349  | -1.409481 | 1.609614 |
| H | -4.253295 | 6.428928  | -4.237204 | C | 3.738923  | -0.009664 | 1.497605 |
| H | -5.162946 | 5.321374  | -3.440658 | C | 2.700063  | 0.929361  | 1.862084 |
| N | -6.816314 | 1.975905  | 0.151063  | C | 2.955307  | 2.301126  | 2.228971 |
| H | -7.388523 | 1.491741  | 0.830247  | C | 1.874274  | 3.239781  | 2.280654 |
| H | -6.444923 | 2.809569  | 0.589015  | C | 0.538132  | 2.812326  | 1.926942 |
| N | -7.097176 | -0.887020 | -0.067135 | C | 0.276927  | 1.420439  | 1.895395 |
| H | -6.954584 | -1.894073 | -0.033294 | C | -1.083458 | 0.943698  | 1.905251 |
| H | -7.400586 | -0.559743 | 0.845621  | C | -1.359577 | -0.469890 | 1.911046 |
| N | -5.275322 | -4.994263 | -3.575017 | C | -0.271008 | -1.414428 | 1.906630 |
| H | -5.926565 | -4.292418 | -3.906247 | C | 1.089122  | -0.941764 | 1.919180 |
| H | -5.271928 | -5.788380 | -4.201327 | C | 1.363065  | 0.473259  | 1.885858 |
| N | -2.939212 | -6.651757 | -3.579910 | C | 2.158085  | 4.538072  | 2.761891 |
| H | -3.436052 | -6.816288 | -4.450723 | C | 3.437873  | 4.970936  | 3.071574 |
| H | -2.017428 | -7.066861 | -3.665343 | C | 4.496818  | 4.029018  | 3.068027 |
| N | 1.625319  | -6.903279 | 0.109810  | C | 4.223792  | 2.726324  | 2.689435 |
| H | 2.278083  | -7.090424 | 0.862358  | C | -2.881979 | 4.077291  | 1.012104 |
| H | 0.683994  | -7.043010 | 0.454753  | C | -2.640419 | 5.352144  | 0.525622 |
| N | 4.261043  | -5.692362 | 0.061187  | C | -1.311041 | 5.846141  | 0.584488 |
| H | 4.120527  | -5.779175 | 1.069109  | C | -0.319694 | 5.039034  | 1.117691 |
| H | 4.358532  | -6.645436 | -0.284323 | C | -4.990535 | -0.423873 | 2.824699 |
| N | 7.045928  | -2.049620 | -3.324919 | C | -6.002346 | 0.461260  | 3.160617 |
| H | 6.800723  | -2.981147 | -3.638784 | C | -5.710598 | 1.848404  | 3.198606 |
| H | 7.763340  | -1.657512 | -3.920296 | C | -4.446823 | 2.270513  | 2.824236 |
| N | 7.257054  | 0.798357  | -3.490898 | C | -2.099756 | -4.517338 | 0.961014 |
| H | 7.662488  | 0.430328  | -4.346782 | C | -3.331053 | -4.904174 | 0.445180 |
| H | 7.148542  | 1.800848  | -3.602456 | C | -4.411167 | -3.989371 | 0.525048 |
| N | 5.242883  | 4.855925  | 0.017771  | C | -4.197295 | -2.751466 | 1.094236 |
| H | 5.170529  | 5.672815  | 0.607876  | C | 2.843362  | -4.087619 | 2.919046 |
| H | 5.737263  | 4.131728  | 0.522600  | C | 2.584919  | -5.404161 | 3.268303 |
| N | 2.977607  | 6.582747  | -0.105530 | C | 1.245849  | -5.870825 | 3.223367 |
| H | 2.086548  | 7.059220  | -0.168493 | C | 0.253739  | -5.003749 | 2.797775 |
| H | 3.304905  | 6.629947  | 0.858603  | C | 4.970225  | 0.386122  | 0.930020 |
| C | -0.537490 | 3.719946  | 1.579899  | C | 5.926338  | -0.501730 | 0.454046 |
| C | -1.880745 | 3.233025  | 1.538540  | C | 5.668595  | -1.895139 | 0.573682 |
| C | -2.151500 | 1.865811  | 1.920377  | C | 4.486671  | -2.295390 | 1.173754 |
| C | -3.454954 | 1.396087  | 2.321530  | H | 1.345672  | 5.238386  | 2.914949 |
| C | -3.728319 | -0.008060 | 2.342710  | H | 5.019317  | 1.995982  | 2.791908 |

|   |           |           |           |                             |           |           |           |
|---|-----------|-----------|-----------|-----------------------------|-----------|-----------|-----------|
| H | -3.888510 | 3.695722  | 0.919952  | H                           | 4.505026  | 6.546309  | 3.865188  |
| H | 0.691682  | 5.410787  | 1.051394  |                             |           |           |           |
| H | -5.193053 | -1.480875 | 2.948582  |                             |           |           |           |
| H | -4.207559 | 3.320728  | 2.952934  | 240                         |           |           |           |
| H | -1.269651 | -5.200705 | 0.851801  | OCH3 substituted homodimers |           |           |           |
| H | -5.025195 | -2.064247 | 1.059840  | C                           | -2.744846 | 2.712162  | -1.372299 |
| H | 3.846591  | -3.713187 | 3.088032  | C                           | -1.627606 | 3.596324  | -1.335456 |
| H | -0.774390 | -5.340748 | 2.876540  | C                           | -0.323415 | 3.096193  | -1.699301 |
| H | 5.160119  | 1.440061  | 0.784993  | C                           | 0.760546  | 3.930131  | -2.156554 |
| H | 4.286580  | -3.353976 | 1.164339  | C                           | 2.090624  | 3.410345  | -2.183865 |
| N | -1.024346 | 7.141412  | 0.089651  | C                           | 2.327290  | 2.055784  | -1.740384 |
| H | -0.031401 | 7.336897  | 0.121256  | C                           | 3.629639  | 1.534502  | -1.395340 |
| H | -1.353193 | 7.286896  | -0.863683 | C                           | 3.833248  | 0.124569  | -1.352421 |
| N | -3.689124 | 6.128993  | 0.011298  | C                           | 2.750543  | -0.757668 | -1.728623 |
| H | -3.402383 | 6.870169  | -0.612828 | C                           | 2.941787  | -2.101716 | -2.219752 |
| H | -4.396240 | 5.570977  | -0.449405 | C                           | 1.824533  | -2.989449 | -2.292787 |
| N | -6.720918 | 2.779597  | 3.556652  | C                           | 0.518512  | -2.535658 | -1.868139 |
| H | -7.206493 | 2.532657  | 4.414265  | C                           | -0.605178 | -3.416010 | -1.638010 |
| H | -6.334158 | 3.710118  | 3.673405  | C                           | -1.932038 | -2.889948 | -1.672720 |
| N | -7.317420 | -0.012708 | 3.382501  | C                           | -2.129966 | -1.482021 | -1.927165 |
| H | -7.338106 | -0.980090 | 3.682696  | C                           | -3.373177 | -0.916203 | -2.399926 |
| H | -7.885071 | 0.555655  | 3.997145  | C                           | -3.596092 | 0.491509  | -2.301343 |
| N | -5.705997 | -4.261006 | -0.064478 | C                           | -2.551673 | 1.336015  | -1.768106 |
| H | -5.597607 | -4.456484 | -1.061071 | C                           | -1.242708 | 0.807904  | -1.708434 |
| H | -6.102905 | -5.107645 | 0.339378  | C                           | -0.115711 | 1.701148  | -1.668833 |
| N | -3.514345 | -6.169440 | -0.131399 | C                           | 1.222395  | 1.177394  | -1.677474 |
| H | -4.205716 | -6.170436 | -0.872480 | C                           | 1.435597  | -0.246814 | -1.693217 |
| H | -2.652612 | -6.558261 | -0.493051 | C                           | 0.310548  | -1.142485 | -1.750425 |
| N | 0.947765  | -7.218048 | 3.560354  | C                           | -1.028921 | -0.612471 | -1.770036 |
| H | 1.370199  | -7.514769 | 4.435304  | C                           | -4.771269 | 1.032921  | -2.883736 |
| H | -0.053877 | -7.361336 | 3.634110  | C                           | -5.717995 | 0.245984  | -3.518418 |
| N | 3.651952  | -6.274174 | 3.594763  | C                           | -5.462049 | -1.143233 | -3.671784 |
| H | 4.467227  | -5.778745 | 3.935864  | C                           | -4.315672 | -1.682233 | -3.130497 |
| H | 3.418035  | -7.031447 | 4.222937  | C                           | -1.821520 | 4.918528  | -0.868245 |
| N | 6.572630  | -2.854567 | 0.078268  | C                           | -3.060224 | 5.395941  | -0.470597 |
| H | 6.150126  | -3.779527 | 0.039447  | C                           | -4.183505 | 4.523262  | -0.536286 |
| H | 6.953224  | -2.622801 | -0.835404 | C                           | -3.994975 | 3.221399  | -0.950343 |
| N | 7.117128  | -0.024907 | -0.114235 | C                           | 3.111549  | 4.196385  | -2.777021 |
| H | 7.569096  | -0.664751 | -0.753617 | C                           | 2.873961  | 5.463796  | -3.284730 |
| H | 6.993418  | 0.862531  | -0.584641 | C                           | 1.543014  | 5.964081  | -3.285778 |
| N | 5.817077  | 4.439362  | 3.400343  | C                           | 0.532000  | 5.195772  | -2.750656 |
| H | 5.861333  | 4.951661  | 4.277119  | C                           | 5.072407  | -0.362433 | -0.871281 |
| H | 6.435202  | 3.638575  | 3.479723  | C                           | 6.108692  | 0.473271  | -0.486397 |
| N | 3.681460  | 6.345448  | 3.313954  | C                           | 5.915955  | 1.879863  | -0.552285 |
| H | 2.876053  | 6.823288  | 3.700488  | C                           | 4.698439  | 2.364882  | -0.983277 |

|   |           |           |           |   |           |           |           |
|---|-----------|-----------|-----------|---|-----------|-----------|-----------|
| C | 2.017707  | -4.231901 | -2.948316 | H | -6.744912 | -0.772416 | -5.998806 |
| C | 3.233989  | -4.631582 | -3.458112 | H | -5.421653 | -1.971759 | -6.200685 |
| C | 4.348760  | -3.755345 | -3.370494 | H | -7.128593 | -2.519033 | -6.124762 |
| C | 4.176747  | -2.511498 | -2.787719 | C | -7.171626 | 2.107533  | -3.879479 |
| C | -3.012083 | -3.763841 | -1.399132 | H | -6.434683 | 2.732073  | -4.403793 |
| C | -2.836108 | -5.112473 | -1.136697 | H | -8.164059 | 2.263535  | -4.308965 |
| C | -1.512730 | -5.635110 | -1.085682 | H | -7.174653 | 2.375587  | -2.814243 |
| C | -0.451028 | -4.784691 | -1.317358 | C | -5.772899 | 5.253889  | 1.098714  |
| H | -4.899331 | 2.104406  | -2.895873 | H | -5.918990 | 4.323061  | 1.656487  |
| H | -4.123756 | -2.727119 | -3.338229 | H | -4.980241 | 5.840438  | 1.572715  |
| H | -0.957828 | 5.558392  | -0.776795 | H | -6.702796 | 5.830067  | 1.084414  |
| H | -4.855091 | 2.570577  | -0.916250 | C | -2.172948 | 7.560659  | 0.015198  |
| H | 4.095664  | 3.767571  | -2.891759 | H | -2.565448 | 8.507905  | 0.392547  |
| H | -0.475639 | 5.581858  | -2.841278 | H | -1.374727 | 7.195190  | 0.674663  |
| H | 5.194981  | -1.428708 | -0.771942 | H | -1.764072 | 7.700563  | -0.995310 |
| H | 4.553422  | 3.433478  | -0.931279 | C | 1.317134  | 7.343217  | -5.202942 |
| H | 1.179276  | -4.890516 | -3.131074 | H | 2.330237  | 7.129120  | -5.563606 |
| H | 4.987329  | -1.798588 | -2.824817 | H | 0.599186  | 6.660762  | -5.681033 |
| H | -4.007658 | -3.353075 | -1.354708 | H | 1.051805  | 8.379206  | -5.433256 |
| H | 0.535650  | -5.206873 | -1.208813 | C | 5.184139  | 5.802782  | -3.791871 |
| O | 3.339040  | -5.876336 | -4.044051 | H | 5.299421  | 4.899263  | -4.407213 |
| O | 5.525603  | -4.206466 | -3.911613 | H | 5.792431  | 6.612325  | -4.202106 |
| O | 7.327196  | 0.042784  | -0.034613 | H | 5.497843  | 5.578181  | -2.762829 |
| O | 6.908099  | 2.786442  | -0.245810 | C | 7.373605  | 2.781794  | 1.125239  |
| O | 3.834127  | 6.278159  | -3.822061 | H | 6.536474  | 2.937509  | 1.812536  |
| O | 1.237840  | 7.220252  | -3.769039 | H | 7.874819  | 1.844453  | 1.378038  |
| O | -3.289471 | 6.661893  | -0.008722 | H | 8.076369  | 3.616982  | 1.197217  |
| O | -5.464351 | 4.958776  | -0.282197 | C | 7.493413  | -1.361001 | 0.147182  |
| O | -6.887314 | 0.715636  | -4.053785 | H | 8.491364  | -1.494294 | 0.571367  |
| O | -6.346349 | -1.979462 | -4.324145 | H | 6.735374  | -1.751223 | 0.837744  |
| O | -3.857484 | -5.996080 | -0.922169 | H | 7.417692  | -1.893836 | -0.811873 |
| O | -1.253959 | -6.973319 | -0.910323 | C | 6.617584  | -3.286554 | -3.953841 |
| C | 3.449166  | -5.846634 | -5.479917 | H | 7.442952  | -3.824033 | -4.426832 |
| H | 2.554022  | -5.381974 | -5.918784 | H | 6.360833  | -2.394170 | -4.542141 |
| H | 4.345527  | -5.299489 | -5.797116 | H | 6.909963  | -2.971486 | -2.941550 |
| H | 3.518443  | -6.890293 | -5.800311 | C | -2.901316 | 2.105102  | 2.320036  |
| C | -1.602217 | -7.540954 | 0.372372  | C | -1.758896 | 2.955586  | 2.410531  |
| H | -0.864903 | -7.246254 | 1.126856  | C | -0.478782 | 2.473811  | 1.935818  |
| H | -2.598514 | -7.227625 | 0.697314  | C | 0.655219  | 3.328596  | 1.685883  |
| H | -1.577621 | -8.625747 | 0.236629  | C | 1.973609  | 2.779269  | 1.664468  |
| C | -5.189799 | -5.546578 | -1.201259 | C | 2.148523  | 1.354300  | 1.868066  |
| H | -5.824543 | -6.430927 | -1.105066 | C | 3.396833  | 0.738571  | 2.265882  |
| H | -5.519307 | -4.777953 | -0.491911 | C | 3.563112  | -0.677581 | 2.147557  |
| H | -5.256208 | -5.143771 | -2.221352 | C | 2.465512  | -1.489258 | 1.675165  |
| C | -6.407848 | -1.785883 | -5.750807 | C | 2.591712  | -2.886631 | 1.313215  |

|   |           |           |          |   |           |           |           |
|---|-----------|-----------|----------|---|-----------|-----------|-----------|
| C | 1.451409  | -3.735983 | 1.424762 | H | 4.272696  | 2.505717  | 3.181158  |
| C | 0.174125  | -3.168812 | 1.780943 | H | 0.746295  | -5.757416 | 1.060237  |
| C | -0.951971 | -3.946374 | 2.239362 | H | 4.626673  | -2.772494 | 0.630774  |
| C | -2.267425 | -3.394553 | 2.167146 | H | -4.326177 | -3.698001 | 2.731584  |
| C | -2.438540 | -2.038637 | 1.701363 | H | 0.201234  | -5.588505 | 3.076098  |
| C | -3.709049 | -1.460240 | 1.331820 | O | 2.844615  | -6.967725 | 0.304507  |
| C | -3.870786 | -0.045044 | 1.361750 | O | 5.027961  | -5.342194 | -0.097643 |
| C | -2.759098 | 0.779349  | 1.772351 | O | 6.913661  | -1.051617 | 3.764758  |
| C | -1.463791 | 0.225340  | 1.711107 | O | 6.513010  | 1.664721  | 4.038378  |
| C | -0.310593 | 1.081654  | 1.776299 | O | 3.896442  | 5.910832  | 0.975791  |
| C | 1.015349  | 0.515150  | 1.743748 | O | 1.307466  | 6.900641  | 1.032803  |
| C | 1.175177  | -0.915819 | 1.675408 | O | -3.278122 | 5.809744  | 4.280016  |
| C | 0.015822  | -1.769982 | 1.685854 | O | -5.428418 | 4.080465  | 4.157719  |
| C | -1.301661 | -1.201351 | 1.673579 | O | -7.358360 | 0.218257  | 0.063166  |
| C | -5.096298 | 0.510482  | 0.922403 | O | -7.015244 | -2.536070 | 0.091714  |
| C | -6.152083 | -0.271246 | 0.480549 | O | -4.183841 | -6.183186 | 3.743677  |
| C | -5.991446 | -1.685793 | 0.448795 | O | -1.605963 | -7.157252 | 3.944448  |
| C | -4.793406 | -2.233134 | 0.857853 | C | 2.877448  | -7.289522 | -1.105234 |
| C | -1.891351 | 4.187379  | 3.101661 | H | 1.946103  | -6.968006 | -1.587863 |
| C | -3.090782 | 4.606696  | 3.653151 | H | 3.731527  | -6.821392 | -1.602312 |
| C | -4.211553 | 3.733922  | 3.605077 | H | 2.961957  | -8.378474 | -1.159669 |
| C | -4.096100 | 2.523768  | 2.957232 | C | -1.814204 | -7.225814 | 5.368358  |
| C | 3.052371  | 3.659637  | 1.393417 | H | -1.140287 | -6.525549 | 5.883626  |
| C | 2.879751  | 5.019710  | 1.180631 | H | -2.854896 | -6.999528 | 5.629458  |
| C | 1.561675  | 5.552892  | 1.168065 | H | -1.572658 | -8.252162 | 5.659772  |
| C | 0.502542  | 4.703548  | 1.394565 | C | -5.519842 | -5.699094 | 3.569815  |
| C | 4.743257  | -1.269449 | 2.670072 | H | -6.172917 | -6.490581 | 3.944968  |
| C | 5.748649  | -0.527376 | 3.265147 | H | -5.685070 | -4.775209 | 4.141958  |
| C | 5.565192  | 0.872144  | 3.419724 | H | -5.730374 | -5.505857 | 2.508761  |
| C | 4.412704  | 1.459332  | 2.943762 | C | -7.388965 | -2.505952 | -1.304309 |
| C | 1.598939  | -5.094777 | 1.056953 | H | -7.619078 | -1.490061 | -1.638244 |
| C | 2.780134  | -5.623933 | 0.585397 | H | -6.580214 | -2.913522 | -1.920298 |
| C | 3.903404  | -4.766724 | 0.426327 | H | -8.278215 | -3.137218 | -1.389361 |
| C | 3.789458  | -3.433324 | 0.789877 | C | -7.583111 | 1.624176  | 0.211152  |
| C | -3.344895 | -4.146274 | 2.701458 | H | -6.905902 | 2.209728  | -0.423566 |
| C | -3.169352 | -5.401103 | 3.262102 | H | -8.616987 | 1.792679  | -0.099428 |
| C | -1.851178 | -5.920222 | 3.387531 | H | -7.448051 | 1.934148  | 1.256795  |
| C | -0.789426 | -5.188825 | 2.899430 | C | -5.443754 | 4.099745  | 5.598639  |
| H | -5.189942 | 1.584988  | 0.900916 | H | -5.202933 | 3.101514  | 5.992420  |
| H | -4.683568 | -3.302647 | 0.761178 | H | -4.733417 | 4.836398  | 5.992392  |
| H | -1.011704 | 4.792817  | 3.258233 | H | -6.462622 | 4.375025  | 5.886536  |
| H | -4.950507 | 1.859969  | 3.001277 | C | -2.178919 | 6.726827  | 4.270799  |
| H | 4.044748  | 3.250703  | 1.302546 | H | -2.551783 | 7.640944  | 4.738909  |
| H | -0.487165 | 5.125559  | 1.315899 | H | -1.328317 | 6.333315  | 4.844917  |
| H | 4.822351  | -2.346328 | 2.667649 | H | -1.852173 | 6.933798  | 3.242486  |



|   |          |           |           |   |           |           |           |
|---|----------|-----------|-----------|---|-----------|-----------|-----------|
| C | 1.617877 | 7.484827  | -0.251900 | C | -2.550203 | -0.011226 | 1.397629  |
| H | 2.607746 | 7.181687  | -0.605284 | C | -1.861076 | -1.255114 | 1.568094  |
| H | 0.864725 | 7.188387  | -0.989527 | C | -0.428585 | -1.263517 | 1.706385  |
| H | 1.591185 | 8.568448  | -0.104739 | C | 3.509120  | -1.322679 | 3.246312  |
| C | 5.233344 | 5.456572  | 1.220363  | C | 4.063053  | -2.503525 | 3.701763  |
| H | 5.554545 | 4.722169  | 0.474375  | C | 3.369772  | -3.710675 | 3.472539  |
| H | 5.863734 | 6.347204  | 1.156650  | C | 2.156931  | -3.705131 | 2.823995  |
| H | 5.311368 | 5.011359  | 2.221775  | C | 2.432647  | 3.646554  | 1.881614  |
| C | 6.589718 | 1.486634  | 5.466334  | C | 3.799009  | 3.651493  | 1.700140  |
| H | 5.625938 | 1.739262  | 5.932082  | C | 4.498231  | 2.426506  | 1.605838  |
| H | 6.867041 | 0.456723  | 5.721301  | C | 3.800129  | 1.243782  | 1.745643  |
| H | 7.362588 | 2.176822  | 5.817414  | C | -2.701650 | 4.790945  | 2.095256  |
| C | 7.033349 | -2.476219 | 3.781341  | C | -2.201987 | 5.855294  | 2.822677  |
| H | 8.002939 | -2.688514 | 4.238142  | C | -0.889157 | 5.797961  | 3.350574  |
| H | 6.227958 | -2.933192 | 4.373185  | C | -0.113667 | 4.682948  | 3.091987  |
| H | 7.003948 | -2.889615 | 2.763120  | C | -5.763869 | 1.111644  | -0.084249 |
| C | 6.142739 | -4.489149 | -0.338382 | C | -6.243637 | 2.187379  | -0.808392 |
| H | 6.906026 | -5.115648 | -0.805899 | C | -5.485693 | 3.381650  | -0.858076 |
| H | 5.864148 | -3.670570 | -1.014256 | C | -4.293317 | 3.473595  | -0.167592 |
| H | 6.525710 | -4.067615 | 0.602797  | C | -4.724241 | -3.447722 | 2.495515  |

168

OH substituted homodimers

|   |           |           |          |   |           |           |           |
|---|-----------|-----------|----------|---|-----------|-----------|-----------|
| C | 2.407756  | 1.210594  | 1.984525 | C | 0.227133  | -4.787238 | 0.782697  |
| C | 1.689784  | 2.450069  | 2.015533 | C | -0.449248 | -5.892692 | 0.307695  |
| C | 0.245145  | 2.438077  | 2.037830 | C | -1.855223 | -5.938853 | 0.405936  |
| C | -0.571445 | 3.605803  | 2.297544 | C | -2.541416 | -4.865628 | 0.935453  |
| C | -1.924856 | 3.635016  | 1.823795 | H | 4.019244  | -0.407501 | 3.515456  |
| C | -2.504583 | 2.443611  | 1.255942 | H | 1.610537  | -4.639587 | 2.751991  |
| C | -3.788538 | 2.393261  | 0.592137 | H | 1.920254  | 4.594933  | 1.812838  |
| C | -4.539861 | 1.175814  | 0.620538 | H | 4.346202  | 0.325548  | 1.591848  |
| C | -3.950239 | 0.003979  | 1.228726 | H | -3.749374 | 4.812626  | 1.812174  |
| C | -4.696220 | -1.145628 | 1.680677 | H | 0.852657  | 4.628672  | 3.577312  |
| C | -4.004821 | -2.379977 | 1.906211 | H | -6.299715 | 0.173934  | -0.161573 |
| C | -2.589719 | -2.462603 | 1.631476 | H | -3.699204 | 4.373334  | -0.284985 |
| C | -1.879405 | -3.693807 | 1.367488 | H | -4.202962 | -4.357386 | 2.777570  |
| C | -0.449635 | -3.677587 | 1.334688 | H | -6.591200 | -0.115477 | 1.942476  |
| C | 0.256320  | -2.490864 | 1.763289 | H | 1.297584  | -4.733801 | 0.626583  |
| C | 1.584921  | -2.512129 | 2.318089 | H | -3.618441 | -4.879852 | 0.847626  |
| C | 2.294665  | -1.282761 | 2.518300 | O | -6.798059 | -4.345782 | 3.405492  |
| C | 1.682053  | -0.035660 | 2.102299 | O | -8.072699 | -1.972801 | 2.910405  |
| C | 0.292697  | -0.025776 | 1.848233 | O | -2.576335 | -6.966750 | -0.171195 |
| C | -0.420611 | 1.223386  | 1.769789 | O | 0.166619  | -6.955378 | -0.329194 |
| C | -1.822263 | 1.225640  | 1.450654 | O | 3.979400  | -4.878882 | 3.936487  |
|   |           |           |          | O | 5.246408  | -2.468697 | 4.393542  |

|   |           |           |           |   |           |           |           |
|---|-----------|-----------|-----------|---|-----------|-----------|-----------|
| O | 5.837448  | 2.384364  | 1.331236  | C | 4.293138  | -3.473744 | 0.167184  |
| O | 4.542052  | 4.796858  | 1.513400  | C | 4.724463  | 3.447973  | -2.494801 |
| O | -0.385036 | 6.800371  | 4.137777  | C | 6.064451  | 3.339146  | -2.806890 |
| O | -2.937873 | 6.982895  | 3.143184  | C | 6.754046  | 2.125414  | -2.570456 |
| O | -5.995149 | 4.392670  | -1.655303 | C | 6.063528  | 1.056665  | -2.033668 |
| O | -7.402497 | 2.055132  | -1.518091 | C | -0.227323 | 4.787362  | -0.783422 |
| H | -1.941916 | -7.557427 | -0.605683 | C | 0.448914  | 5.892888  | -0.308363 |
| H | -6.228941 | -5.113968 | 3.535190  | C | 1.854908  | 5.939057  | -0.406267 |
| H | -8.381096 | -2.795588 | 3.314327  | C | 2.541167  | 4.865757  | -0.935545 |
| H | -7.485463 | 2.832120  | -2.090565 | C | -3.509369 | 1.322363  | -3.246067 |
| H | -5.268469 | 4.850710  | -2.100557 | C | -4.063669 | 2.503208  | -3.701094 |
| H | -3.853296 | 6.849199  | 2.868092  | C | -3.370387 | 3.710400  | -3.472087 |
| H | -1.085856 | 7.448307  | 4.295248  | C | -2.157073 | 3.704852  | -2.824420 |
| H | 3.948177  | 5.545514  | 1.349345  | C | -2.432447 | -3.646724 | -1.882033 |
| H | 6.138255  | 3.285421  | 1.147120  | C | -3.798809 | -3.651649 | -1.700435 |
| H | 5.437310  | -3.359708 | 4.716775  | C | -4.497955 | -2.426660 | -1.605500 |
| H | 3.313370  | -5.576643 | 3.979667  | C | -3.799865 | -1.243932 | -1.745364 |
| H | 0.909007  | -6.612179 | -0.850516 | C | 2.702207  | -4.790585 | -2.096289 |
| C | 4.696335  | 1.145826  | -1.680117 | C | 2.202585  | -5.854922 | -2.823732 |
| C | 4.004931  | 2.380153  | -1.905771 | C | 0.889571  | -5.797881 | -3.351167 |
| C | 2.589750  | 2.462711  | -1.631407 | C | 0.113868  | -4.683081 | -3.092229 |
| C | 1.879311  | 3.693869  | -1.367644 | H | 6.299493  | -0.174043 | 0.162315  |
| C | 0.449530  | 3.677644  | -1.335179 | H | 3.699085  | -4.373579 | 0.284133  |
| C | -0.256285 | 2.490818  | -1.763811 | H | 4.203244  | 4.357655  | -2.776909 |
| C | -1.584890 | 2.511953  | -2.318556 | H | 6.591484  | 0.115832  | -1.941428 |
| C | -2.294689 | 1.282532  | -2.518470 | H | -1.297809 | 4.734016  | -0.627544 |
| C | -1.681929 | 0.035539  | -2.102463 | H | 3.618143  | 4.879898  | -0.847200 |
| C | -2.407561 | -1.210760 | -1.984537 | H | -4.019477 | 0.407139  | -3.515097 |
| C | -1.689566 | -2.450228 | -2.015732 | H | -1.610660 | 4.639330  | -2.752882 |
| C | -0.244948 | -2.438170 | -2.038100 | H | -1.920219 | -4.595201 | -1.813215 |
| C | 0.571669  | -3.605840 | -2.297933 | H | -4.345832 | -0.325638 | -1.591592 |
| C | 1.925180  | -3.634899 | -1.824468 | H | 3.750050  | -4.811873 | -1.813608 |
| C | 2.504760  | -2.443530 | -1.256420 | H | -0.852664 | -4.629078 | -3.577176 |
| C | 3.788611  | -2.393261 | -0.592442 | O | -4.541993 | -4.796955 | -1.514160 |
| C | 4.539903  | -1.175813 | -0.620396 | O | -5.837008 | -2.384502 | -1.330239 |
| C | 3.950309  | -0.003876 | -1.228460 | O | 0.385391  | -6.800359 | -4.138258 |
| C | 2.550312  | 0.011301  | -1.397670 | O | 2.938751  | -6.982224 | -3.144844 |
| C | 1.861159  | 1.255165  | -1.568197 | O | 5.994348  | -4.392982 | 1.655410  |
| C | 0.428691  | 1.263506  | -1.706723 | O | 7.402104  | -2.055668 | 1.518593  |
| C | -0.292567 | 0.025727  | -1.848522 | O | 8.073120  | 1.973260  | -2.908842 |
| C | 0.420763  | -1.223421 | -1.770093 | O | 6.798479  | 4.346215  | -3.404153 |
| C | 1.822388  | -1.225592 | -1.450952 | O | 2.576016  | 6.966875  | 0.170916  |
| C | 5.763787  | -1.111796 | 0.084625  | O | -0.167217 | 6.955601  | 0.328256  |
| C | 6.243389  | -2.187696 | 0.808668  | O | -3.980478 | 4.878558  | -3.935386 |
| C | 5.485300  | -3.381891 | 0.858027  | O | -5.247388 | 2.468306  | -4.392239 |

|   |           |           |           |   |           |           |           |
|---|-----------|-----------|-----------|---|-----------|-----------|-----------|
| H | 1.086227  | -7.448239 | -4.295870 | C | -0.951280 | 4.897109  | -2.809455 |
| H | -3.948459 | -5.545940 | -1.350402 | C | -5.550704 | -0.513186 | -0.874619 |
| H | -6.138004 | -3.285768 | -1.147475 | C | -6.559520 | 0.341361  | -0.446451 |
| H | -5.438546 | 3.359284  | -3.715400 | C | -6.250154 | 1.712438  | -0.229244 |
| H | -3.314883 | 5.576779  | -4.977845 | C | -4.964276 | 2.151505  | -0.528801 |
| H | -0.909372 | 6.612332  | 0.849893  | C | -2.561544 | -4.427668 | -2.960633 |
| H | 1.941643  | 7.557930  | 0.604935  | C | -3.771535 | -4.759845 | -3.548938 |
| H | 6.229356  | 5.114383  | -3.533934 | C | -4.853965 | -3.835234 | -3.487793 |
| H | 8.381587  | 2.796075  | -3.312652 | C | -4.647222 | -2.612632 | -2.864286 |
| H | 7.484854  | -2.832657 | 2.091103  | C | 2.416686  | -4.111154 | -1.118377 |
| H | 5.267320  | -4.851238 | 2.099820  | C | 2.182558  | -5.452925 | -0.833225 |
| H | 3.853815  | -6.848997 | -2.868328 | C | 0.839083  | -5.928168 | -0.832416 |

240

SCH3 substituted homodimers

|   |           |           |           |   |           |           |           |
|---|-----------|-----------|-----------|---|-----------|-----------|-----------|
| C | 3.775503  | -2.266072 | -3.078421 | C | 2.981356  | 5.028265  | -1.146023 |
| C | 2.884852  | -1.369600 | -2.451499 | C | 4.029894  | 4.063481  | -1.126164 |
| C | 3.098278  | 0.037620  | -2.644912 | C | 3.712048  | 2.737839  | -1.395435 |
| C | 4.139084  | 0.474104  | -3.530066 | S | 3.201504  | 6.791919  | -0.902951 |
| C | 5.083657  | -0.452623 | -4.013783 | S | 5.769153  | 4.391258  | -0.900201 |
| C | 4.863710  | -1.843442 | -3.821887 | S | -4.680195 | 6.344016  | -3.419803 |
| C | 2.129086  | 0.942886  | -2.059105 | S | -1.641711 | 7.237867  | -4.056039 |
| C | 0.820588  | 0.473211  | -1.830838 | S | -8.225487 | -0.326100 | -0.315630 |
| C | 0.566399  | -0.938516 | -1.782107 | S | -7.387817 | 2.990882  | 0.279805  |
| C | 1.644470  | -1.843496 | -1.869176 | S | -3.918298 | -6.348957 | -4.368881 |
| C | -0.786060 | -1.416894 | -1.715356 | S | -6.409738 | -4.292621 | -4.221128 |
| C | -1.040021 | -2.800615 | -1.816298 | S | 3.495967  | -6.598331 | -0.485846 |
| C | 0.044355  | -3.705491 | -1.528090 | S | 0.400552  | -7.638487 | -0.527897 |
| C | 1.390617  | -3.223758 | -1.510507 | S | 6.453113  | 0.173060  | -5.010685 |
| C | -1.877583 | -0.488688 | -1.632285 | S | 5.813779  | -3.138265 | -4.638799 |
| C | -3.208546 | -0.955929 | -1.679220 | C | 4.907174  | -2.382996 | 0.772429  |
| C | -3.430973 | -2.274315 | -2.229253 | C | 3.904298  | -1.457407 | 1.140132  |
| C | -2.348020 | -3.207078 | -2.275131 | C | 4.212286  | -0.068206 | 1.019993  |
| C | -1.614450 | 0.926403  | -1.586927 | C | 5.471973  | 0.308217  | 0.496355  |
| C | -2.688341 | 1.835982  | -1.514791 | C | 6.469745  | -0.619516 | 0.216779  |
| C | -3.979766 | 1.328009  | -1.110696 | C | 6.179005  | -2.003193 | 0.377902  |
| C | -4.259329 | -0.066412 | -1.241629 | C | 3.222076  | 0.901106  | 1.434851  |
| C | -0.266509 | 1.409661  | -1.709284 | C | 1.871585  | 0.493940  | 1.473783  |
| C | -0.018947 | 2.798177  | -1.807992 | C | 1.551909  | -0.908490 | 1.525894  |
| C | -1.127774 | 3.660196  | -2.142376 | C | 2.592603  | -1.862342 | 1.586052  |
| C | -2.466721 | 3.190457  | -1.967807 | C | 0.182968  | -1.325149 | 1.635012  |
| C | -3.534640 | 4.013562  | -2.398785 | C | -0.118717 | -2.688791 | 1.834207  |
| C | -3.340315 | 5.268472  | -2.958650 | C | 0.931117  | -3.546077 | 2.325337  |
| C | -2.006118 | 5.700316  | -3.205390 | C | 2.296036  | -3.145637 | 2.185033  |

|   |           |           |           |   |           |           |           |
|---|-----------|-----------|-----------|---|-----------|-----------|-----------|
| C | -0.875130 | -0.347918 | 1.644859  | S | 7.434618  | -3.275397 | 0.221476  |
| C | -2.215302 | -0.768785 | 1.779770  | H | 2.005095  | 4.994681  | 3.200613  |
| C | -2.520904 | -2.161515 | 1.542283  | H | 5.586721  | 1.722423  | 2.413789  |
| C | -1.473332 | -3.126579 | 1.605407  | H | -3.251729 | 3.988566  | 0.995969  |
| C | -0.552387 | 1.054663  | 1.634948  | H | 1.400755  | 5.533376  | 1.301061  |
| C | -1.579770 | 2.014744  | 1.755764  | H | -4.512293 | -1.301391 | 3.062792  |
| C | -2.862537 | 1.578000  | 2.258794  | H | -3.485674 | 3.504296  | 3.025780  |
| C | -3.179002 | 0.184272  | 2.279027  | H | -1.017781 | -5.219213 | 1.402240  |
| C | 0.824590  | 1.473438  | 1.588292  | H | -4.576308 | -1.864632 | 1.006923  |
| C | 1.149242  | 2.839379  | 1.753970  | H | 4.315568  | -3.602233 | 2.758961  |
| C | 0.107311  | 3.820219  | 1.564362  | H | -0.371996 | -4.918201 | 3.371719  |
| C | -1.255778 | 3.399509  | 1.491804  | H | 5.660838  | 1.361329  | 0.337089  |
| C | -2.244693 | 4.345420  | 1.143917  | H | 4.675600  | -3.438408 | 0.788801  |
| C | -1.968326 | 5.698736  | 0.988732  | C | 7.641534  | -3.418426 | -1.601574 |
| C | -0.612846 | 6.127081  | 1.087103  | C | 5.808032  | -5.428441 | 3.478792  |
| C | 0.376466  | 5.191054  | 1.337522  | C | 1.539633  | -6.255511 | 6.371001  |
| C | -4.339186 | -0.240377 | 2.972446  | C | -4.505619 | -7.037831 | 2.333540  |
| C | -5.188572 | 0.640343  | 3.624336  | C | -5.873938 | -5.539763 | -0.695693 |
| C | -4.879646 | 2.029549  | 3.597679  | C | -6.487957 | -1.716475 | 4.467951  |
| C | -3.743213 | 2.457493  | 2.936289  | C | -5.247541 | 3.052868  | 6.172235  |
| C | -1.805363 | -4.480161 | 1.390498  | C | -4.732779 | 5.934067  | 0.510828  |
| C | -3.097459 | -4.921639 | 1.137902  | C | -0.349436 | 8.178906  | -0.843393 |
| C | -4.126721 | -3.948588 | 0.984037  | C | 4.363154  | 5.434666  | 6.086050  |
| C | -3.809489 | -2.607199 | 1.181090  | C | 7.706630  | 2.547966  | 3.336634  |
| C | 3.295403  | -3.950535 | 2.780775  | C | 7.905094  | 1.561278  | -0.836548 |
| C | 3.009810  | -5.126836 | 3.462741  | H | 0.888358  | 5.322885  | -1.239059 |
| C | 1.645846  | -5.468493 | 3.683215  | H | 4.494002  | 1.989296  | -1.374579 |
| C | 0.655114  | -4.681422 | 3.124349  | H | -4.536783 | 3.619589  | -2.336158 |
| C | 2.498252  | 3.158701  | 2.166314  | H | 0.044010  | 5.208873  | -3.097817 |
| C | 3.543950  | 2.203090  | 1.971422  | H | -5.774596 | -1.572226 | -0.913596 |
| C | 2.800494  | 4.312992  | 2.928551  | H | -4.708635 | 3.173014  | -0.287112 |
| C | 4.063841  | 4.577676  | 3.432002  | H | -1.734622 | -5.111966 | -3.100869 |
| C | 5.115888  | 3.647841  | 3.194711  | H | -5.421407 | -1.862668 | -2.910826 |
| C | 4.826914  | 2.483244  | 2.499580  | H | 3.419048  | -3.718481 | -1.028798 |
| S | 4.317122  | 6.090908  | 4.362293  | H | -1.197459 | -5.410986 | -1.087036 |
| S | 6.737700  | 4.021254  | 3.830218  | H | 4.144634  | 1.469489  | -3.961386 |
| S | -3.213407 | 6.930071  | 0.702172  | H | 3.551132  | -3.323279 | -3.078464 |
| S | -0.136588 | 7.850692  | 0.957790  | C | 5.230819  | -2.935461 | -6.373561 |
| S | -6.603018 | 0.108290  | 4.573226  | C | 4.954717  | -5.751288 | -1.197175 |
| S | -5.886049 | 3.246929  | 4.452788  | C | 0.695717  | -7.819237 | 1.281074  |
| S | -3.303407 | -6.697107 | 0.983460  | C | -3.845623 | -5.832573 | -6.138939 |
| S | -5.848177 | -4.264639 | 0.626617  | C | -7.461275 | -2.834123 | -3.867679 |
| S | 4.271227  | -6.202957 | 4.103624  | C | -8.147780 | -1.184549 | 1.307906  |
| S | 1.158373  | -6.879539 | 4.677168  | C | -8.241618 | 2.328179  | 1.766121  |
| S | 8.119232  | -0.167955 | -0.284648 | C | -6.156892 | 5.322181  | -3.058885 |

|   |           |           |           |                           |           |           |           |
|---|-----------|-----------|-----------|---------------------------|-----------|-----------|-----------|
| C | -2.068699 | 6.773223  | -5.789520 | H                         | -7.952983 | -0.468919 | 2.110357  |
| C | 4.238721  | 7.218643  | -2.362105 | H                         | -7.334059 | -2.092312 | 5.050347  |
| C | 5.900956  | 5.589589  | 0.486742  | H                         | -6.576991 | -2.059277 | 3.433597  |
| C | 7.931272  | -0.503840 | -4.151096 | H                         | -5.551326 | -2.074550 | 4.906276  |
| H | 8.878951  | 1.862809  | -1.233386 | H                         | -8.600732 | 3.206543  | 2.310617  |
| H | 7.152310  | 1.623535  | -1.626721 | H                         | -9.075173 | 1.683982  | 1.480868  |
| H | 7.626154  | 2.225426  | -0.015152 | H                         | -7.532715 | 1.789348  | 2.396504  |
| H | 8.474702  | -4.110653 | -1.758944 | H                         | -6.784454 | -5.347279 | -1.270030 |
| H | 6.734666  | -3.824437 | -2.052478 | H                         | -5.007819 | -5.410229 | -1.342624 |
| H | 7.884265  | -2.446386 | -2.032019 | H                         | -5.884325 | -6.547520 | -0.277227 |
| H | 5.739492  | -3.709138 | -6.957701 | H                         | -4.630700 | -8.125169 | 2.347432  |
| H | 4.148493  | -3.085531 | -6.421941 | H                         | -4.096197 | -6.702608 | 3.290802  |
| H | 5.506894  | -1.945383 | -6.744875 | H                         | -5.466287 | -6.552115 | 2.140318  |
| H | 8.770558  | 0.102211  | -4.508316 | H                         | 1.289162  | -7.070551 | 7.057460  |
| H | 7.824702  | -0.376111 | -3.071048 | H                         | 2.601951  | -6.013448 | 6.459594  |
| H | 8.086587  | -1.555416 | -4.398523 | H                         | 0.922850  | -5.380057 | 6.592989  |
| H | -1.892203 | 7.667416  | -6.395763 | H                         | 6.613238  | -6.108444 | 3.771187  |
| H | -1.419299 | 5.960867  | -6.127956 | H                         | 5.780745  | -5.337552 | 2.388980  |
| H | -3.120548 | 6.483148  | -5.856882 | H                         | 5.978025  | -4.447838 | 3.934631  |
| H | -7.011818 | 5.944229  | -3.338824 | H                         | 0.611085  | -8.890195 | 1.488982  |
| H | -6.158859 | 4.407275  | -3.659491 | H                         | 1.694827  | -7.475363 | 1.555328  |
| H | -6.221625 | 5.074839  | -1.995486 | H                         | -0.068576 | -7.277465 | 1.842901  |
| H | 0.415198  | 7.643207  | -1.410319 | H                         | 5.751556  | -6.501013 | -1.198749 |
| H | -1.355171 | 7.905781  | -1.168259 | H                         | 4.742275  | -5.438170 | -2.223504 |
| H | -0.207591 | 9.257271  | -0.966161 | H                         | 5.279741  | -4.899863 | -0.596295 |
| H | 4.360562  | 8.305967  | -2.329099 | H                         | -3.956928 | -6.749656 | -6.726177 |
| H | 5.215437  | 6.729647  | -2.307928 | H                         | -4.662313 | -5.144276 | -6.371988 |
| H | 3.721852  | 6.933561  | -3.282853 | H                         | -2.876913 | -5.371708 | -6.351888 |
| H | 6.853475  | 5.366986  | 0.976261  | H                         | -8.450166 | -3.093437 | -4.256526 |
| H | 5.880411  | 6.619784  | 0.128006  | H                         | -7.528302 | -2.643665 | -2.791962 |
| H | 5.088645  | 5.421532  | 1.191615  | H                         | -7.089867 | -1.943291 | -4.384009 |
| H | 8.724689  | 2.741006  | 3.686484  |                           |           |           |           |
| H | 7.322497  | 1.640658  | 3.813085  |                           |           |           |           |
| H | 7.711541  | 2.423883  | 2.249537  |                           |           |           |           |
| H | 4.535176  | 6.299420  | 6.734772  | 168                       |           |           |           |
| H | 3.403473  | 4.971697  | 6.332517  | SH substituted_homodimers |           |           |           |
| H | 5.180852  | 4.718517  | 6.201159  | C                         | -1.119020 | -3.626959 | -1.447767 |
| H | -5.535647 | 6.658336  | 0.349376  | C                         | -2.412594 | -3.021499 | -1.450382 |
| H | -4.647219 | 5.288974  | -3.366103 | C                         | -2.542688 | -1.630847 | -1.819277 |
| H | -4.949848 | 5.344740  | 1.406055  | C                         | -3.778045 | -1.023204 | -2.252957 |
| H | -5.825464 | 3.743397  | 6.794639  | C                         | -3.897176 | 0.402600  | -2.260579 |
| H | -5.401958 | 2.026658  | 6.516137  | C                         | -2.779666 | 1.206889  | -1.825267 |
| H | -4.187427 | 3.319135  | 6.207772  | C                         | -2.882027 | 2.597389  | -1.455453 |
| H | -9.128259 | -1.649593 | 1.454787  | C                         | -1.712080 | 3.416126  | -1.440804 |
| H | -7.380885 | -1.962189 | 1.281162  | C                         | -0.445106 | 2.836459  | -1.831016 |
|   |           |           |           | C                         | 0.681834  | 3.603974  | -2.303815 |

|   |           |           |           |   |           |           |           |
|---|-----------|-----------|-----------|---|-----------|-----------|-----------|
| C | 1.974278  | 2.992654  | -2.368760 | H | -4.954632 | 2.519125  | -0.899599 |
| C | 2.132354  | 1.623189  | -1.933676 | H | 3.972311  | 3.207849  | -3.145898 |
| C | 3.407182  | 1.015406  | -1.633316 | H | -0.467195 | 5.311089  | -2.961489 |
| C | 3.527586  | -0.407363 | -1.631889 | H | 4.841175  | -2.049370 | -1.191872 |
| C | 2.370812  | -1.216797 | -1.940096 | H | 4.418109  | 2.844139  | -1.136936 |
| C | 2.441518  | -2.592732 | -2.375886 | H | 7.330852  | 1.680053  | 0.880814  |
| C | 1.272556  | -3.414770 | -2.303380 | H | 5.127531  | 4.899431  | -4.068156 |
| C | 0.032232  | -2.844562 | -1.832642 | H | 1.949510  | 7.165967  | -5.185771 |
| C | -0.082338 | -1.438692 | -1.795946 | H | -4.281312 | 7.065516  | 0.356797  |
| C | -1.384488 | -0.826038 | -1.778075 | H | -5.392947 | 5.212571  | 1.452957  |
| C | -1.505015 | 0.606200  | -1.778192 | H | -7.158307 | 2.244538  | -3.816490 |
| C | -0.324785 | 1.431200  | -1.792240 | H | -7.687583 | -1.570708 | -4.946283 |
| C | 0.976937  | 0.819301  | -1.833634 | H | -5.669331 | -4.967229 | -0.077350 |
| C | 1.097897  | -0.617295 | -1.836816 | H | -2.530029 | -7.267268 | 1.220882  |
| C | 1.335780  | -4.710736 | -2.866060 | H | 3.015684  | -6.708418 | -5.205798 |
| C | 2.494193  | -5.234004 | -3.417680 | H | 5.840262  | -3.924211 | -4.155109 |
| C | 3.652040  | -4.418346 | -3.485238 | H | 6.913359  | -2.255836 | -0.418989 |
| C | 3.590961  | -3.117331 | -3.009020 | C | -0.682468 | -3.603881 | 2.303283  |
| C | -3.507991 | -3.782330 | -0.992149 | C | -1.974685 | -2.992170 | 2.369083  |
| C | -3.380417 | -5.081831 | -0.522296 | C | -2.132686 | -1.622674 | 1.934044  |
| C | -2.089626 | -5.671674 | -0.485833 | C | -3.407521 | -1.014758 | 1.634035  |
| C | -1.006154 | -4.943325 | -0.951780 | C | -3.527682 | 0.408047  | 1.632031  |
| C | -5.056415 | 0.976374  | -2.826880 | C | -2.370679 | 1.217389  | 1.939610  |
| C | -6.114278 | 0.215950  | -3.305463 | C | -2.441077 | 2.593552  | 2.374755  |
| C | -5.987578 | -1.197779 | -3.315399 | C | -1.271996 | 3.415389  | 2.301727  |
| C | -4.823833 | -1.776664 | -2.831076 | C | -0.031722 | 2.844657  | 1.831477  |
| C | -1.826390 | 4.736520  | -0.960425 | C | 1.119926  | 3.626617  | 1.446868  |
| C | -3.017342 | 5.270127  | -0.478916 | C | 2.413457  | 3.021083  | 1.451120  |
| C | -4.170661 | 4.439035  | -0.457374 | C | 2.542945  | 1.630411  | 1.820209  |
| C | -4.081552 | 3.152340  | -0.962933 | C | 3.777886  | 1.022335  | 2.254483  |
| C | 3.021010  | 3.702533  | -2.997596 | C | 3.896853  | -0.403482 | 2.261253  |
| C | 2.863543  | 4.990006  | -3.492337 | C | 2.779335  | -1.207350 | 1.825207  |
| C | 1.578102  | 5.589323  | -3.440881 | C | 2.881457  | -2.597715 | 1.454861  |
| C | 0.523991  | 4.883329  | -2.882925 | C | 1.711376  | -3.416232 | 1.439855  |
| C | 4.756431  | -0.974123 | -1.234115 | C | 0.444499  | -2.836489 | 1.830323  |
| C | 5.844976  | -0.214875 | -0.829309 | C | 0.324435  | -1.431186 | 1.791870  |
| C | 5.713813  | 1.198143  | -0.802669 | C | -0.977162 | -0.819018 | 1.833525  |
| C | 4.521987  | 1.772334  | -1.212782 | C | -1.097869 | 0.617604  | 1.836430  |
| H | 0.433412  | -5.304511 | -2.931927 | C | 0.082545  | 1.438758  | 1.795425  |
| H | 4.441272  | -2.467285 | -3.171083 | C | 1.384587  | 0.825849  | 1.778176  |
| H | -4.484161 | -3.320109 | -0.951152 | C | 1.504810  | -0.606410 | 1.778072  |
| H | -0.024852 | -5.388272 | -0.875922 | C | 1.825488  | -4.736476 | 0.959003  |
| H | -5.108228 | 2.052624  | -2.931751 | C | 3.016339  | -5.270062 | 0.477233  |
| H | -4.695736 | -2.843584 | -2.962677 | C | 4.169830  | -4.439161 | 0.456077  |
| H | -0.940689 | 5.355768  | -0.930412 | C | 4.080927  | -3.152680 | 0.962209  |

|   |           |           |           |                              |           |           |           |
|---|-----------|-----------|-----------|------------------------------|-----------|-----------|-----------|
| C | -3.021226 | -3.701694 | 2.998606  | S                            | -7.268876 | -2.307319 | -3.892787 |
| C | -2.863955 | -4.989301 | 3.493054  | S                            | -7.037728 | -2.295461 | 0.290110  |
| C | -1.578830 | -5.589190 | 3.440400  | S                            | -7.366828 | 0.985030  | 0.311937  |
| C | -0.524794 | -4.883476 | 2.881924  | S                            | -4.796177 | -5.990432 | 0.064968  |
| C | -4.756591 | 0.974790  | 1.234402  | S                            | -4.217564 | -5.878495 | 4.241164  |
| C | -5.845387 | 0.215552  | 0.830230  | S                            | -1.239610 | -7.243593 | 4.036666  |
| C | -5.714491 | -1.197504 | 0.804212  | S                            | -1.779913 | -7.334943 | 0.098038  |
| C | -4.522647 | -1.771646 | 1.214294  | S                            | 2.957317  | -6.944553 | -0.115513 |
| C | -1.335033 | 4.711689  | 2.863675  | S                            | 2.463506  | -6.930926 | -3.990717 |
| C | -2.493314 | 5.235397  | 3.415156  | S                            | 5.146101  | -5.080471 | -4.215827 |
| C | -3.651214 | 4.419875  | 3.483347  | S                            | 5.771774  | -4.956813 | -0.177609 |
| C | -3.590363 | 3.118615  | 3.007792  | S                            | 7.366376  | -0.984339 | -0.310846 |
| C | 3.509423  | 3.781846  | 0.994019  | S                            | 7.595506  | -0.978170 | 3.947362  |
| C | 3.382270  | 5.081053  | 0.523230  | S                            | 7.036808  | 2.295909  | -0.287467 |
| C | 2.091489  | 5.670811  | 0.484826  | S                            | 7.267835  | 2.305041  | 3.897295  |
| C | 1.007535  | 4.942673  | 0.949961  | S                            | 4.217353  | 5.879836  | -4.239334 |
| C | 5.055852  | -0.977739 | 2.827565  | S                            | 4.798657  | 5.989533  | -0.062724 |
| C | 6.113543  | -0.217714 | 3.307167  | S                            | 1.238720  | 7.243419  | -4.037890 |
| C | 5.986841  | 1.196009  | 3.318258  | S                            | 1.782423  | 7.333802  | -0.100097 |
| C | 4.823347  | 1.775305  | 2.833814  | S                            | -2.958559 | 6.944893  | 0.113073  |
| H | 0.939689  | -5.355567 | 0.928780  | S                            | -2.462402 | 6.932597  | 3.987356  |
| H | 4.954084  | -2.519547 | 0.899127  | S                            | -5.772647 | 4.956695  | 0.176231  |
| H | -3.972218 | -3.206626 | 3.147623  | S                            | -5.145096 | 5.082537  | 4.213873  |
| H | 0.466257  | -5.311663 | 2.959788  |                              |           |           |           |
| H | -4.841247 | 2.050029  | 1.191783  |                              |           |           |           |
| H | -4.419082 | -2.843501 | 1.138924  |                              |           |           |           |
| H | -0.432613 | 5.305421  | 2.929149  |                              |           |           |           |
| H | -4.440720 | 2.468750  | 3.170333  |                              |           |           |           |
| H | 4.485861  | 3.320013  | 0.954838  |                              |           |           |           |
| H | 0.026282  | 5.387513  | 0.872862  |                              |           |           |           |
| H | 5.107581  | -2.054067 | 2.931671  |                              |           |           |           |
| H | 4.695122  | 2.842102  | 2.966307  |                              |           |           |           |
| H | 7.685996  | 1.567484  | 4.950343  |                              |           |           |           |
| H | 5.671612  | 4.966286  | 0.080577  |                              |           |           |           |
| H | 2.533827  | 7.265673  | -1.222046 |                              |           |           |           |
| H | -3.013936 | 6.710603  | 5.202823  |                              |           |           |           |
| H | -5.839522 | 3.926416  | 4.153522  |                              |           |           |           |
| H | -6.913527 | 2.256506  | 0.419197  |                              |           |           |           |
| H | -7.332313 | -1.680111 | -0.878293 |                              |           |           |           |
| H | -5.127092 | -4.897152 | 4.071954  |                              |           |           |           |
| H | -1.950057 | -7.166492 | 5.184780  |                              |           |           |           |
| H | 4.280091  | -7.065304 | -0.359079 |                              |           |           |           |
| H | 5.392261  | -5.211670 | -1.454588 |                              |           |           |           |
| H | 7.157354  | -2.246736 | 3.816926  |                              |           |           |           |
| S | -7.596493 | 0.975859  | -3.945704 |                              |           |           |           |
|   |           |           |           | 156                          |           |           |           |
|   |           |           |           | CCH substituted heterodimers |           |           |           |
|   |           |           |           | C                            | 0.154546  | 0.397562  | 0.636644  |
|   |           |           |           | C                            | -0.463644 | 0.862893  | 1.856987  |
|   |           |           |           | C                            | -1.137274 | 2.085131  | 1.870457  |
|   |           |           |           | C                            | -0.593612 | 2.438456  | -0.513733 |
|   |           |           |           | C                            | 0.098149  | 1.167131  | -0.523274 |
|   |           |           |           | C                            | -1.015462 | -0.289909 | 2.542547  |
|   |           |           |           | C                            | -2.407106 | 2.197710  | 2.561874  |
|   |           |           |           | C                            | -1.268308 | 2.582107  | -1.791101 |
|   |           |           |           | C                            | -0.132285 | 0.530480  | -1.802141 |
|   |           |           |           | C                            | -0.004154 | -1.036836 | 0.566078  |
|   |           |           |           | C                            | -2.536228 | 3.166280  | -1.845085 |
|   |           |           |           | C                            | -3.174497 | 3.629293  | -0.625886 |
|   |           |           |           | C                            | -2.237562 | -0.181027 | 3.209607  |
|   |           |           |           | C                            | -3.264649 | 3.067962  | 1.777935  |
|   |           |           |           | C                            | -2.947650 | 1.086401  | 3.216161  |
|   |           |           |           | C                            | -0.980338 | 1.402544  | -2.587508 |
|   |           |           |           | C                            | -0.287498 | -0.855913 | -1.872103 |
|   |           |           |           | C                            | -0.221095 | -1.654388 | -0.664460 |

|   |           |           |           |   |          |           |           |
|---|-----------|-----------|-----------|---|----------|-----------|-----------|
| C | -0.727005 | -1.466634 | 1.743629  | C | 3.334376 | -2.754564 | -2.464928 |
| C | -1.304911 | -1.428057 | -2.730011 | C | 3.412454 | -1.567887 | -3.260250 |
| C | -1.192972 | -2.722753 | -0.772273 | C | 3.094833 | -0.295662 | -2.655419 |
| C | -1.665822 | -2.496205 | 1.640269  | C | 2.631238 | 0.855337  | -3.389459 |
| C | -1.964864 | 0.852666  | -3.411619 | C | 2.640131 | 2.140202  | -2.755836 |
| C | -4.366853 | 0.803088  | 3.111055  | C | 3.123466 | 2.256703  | -1.402314 |
| C | -1.866808 | -2.582429 | -2.049631 | C | 3.460625 | 3.511096  | -0.769169 |
| C | -1.903543 | -3.135469 | 0.358318  | C | 3.390999 | 3.608969  | 0.655759  |
| C | -2.937253 | -2.381486 | 2.329429  | C | 2.980490 | 2.452115  | 1.418987  |
| C | -3.961961 | -2.950232 | 1.472927  | C | 2.349347 | 2.522880  | 2.712688  |
| C | -6.217448 | 1.070990  | 1.501027  | C | 2.238885 | 1.334376  | 3.505309  |
| C | -3.322568 | -3.415897 | 0.255245  | C | 2.770511 | 0.094573  | 2.997288  |
| C | -3.975346 | -3.277856 | -0.973962 | C | 2.985099 | -1.084512 | 3.804329  |
| C | -5.291513 | -2.668346 | -1.031353 | C | 2.975195 | -2.368765 | 3.174799  |
| C | -3.234347 | -2.853354 | -2.147821 | C | 2.747100 | -2.450129 | 1.750040  |
| C | -3.281538 | 1.460862  | -3.468522 | C | 2.983314 | -1.296160 | 0.976984  |
| C | -6.378761 | -0.315856 | 1.431317  | C | 3.061943 | -1.393808 | -0.452553 |
| C | -2.130287 | -0.587223 | -3.484705 | C | 3.151074 | -0.201432 | -1.250406 |
| C | -3.550657 | -0.869680 | -3.584534 | C | 3.175717 | 1.087232  | -0.618894 |
| C | -5.520531 | -1.186204 | 2.213952  | C | 3.106218 | 1.185632  | 0.814590  |
| C | -6.288937 | 1.871321  | 0.292744  | C | 3.001496 | -0.003868 | 1.610405  |
| C | -6.519633 | 1.255972  | -0.940876 | C | 3.281931 | -3.503629 | 3.950867  |
| C | -5.229783 | -2.363806 | 1.416722  | C | 3.570867 | -3.422747 | 5.312729  |
| C | -5.907649 | -2.220977 | 0.141270  | C | 3.580109 | -2.134822 | 5.944052  |
| C | -4.091732 | -1.980262 | -2.929952 | C | 3.300118 | -1.005769 | 5.175000  |
| C | -5.363491 | -1.867359 | -2.239755 | C | 1.610099 | -4.759769 | -0.987592 |
| C | -6.617767 | -0.955001 | 0.150354  | C | 0.818898 | -5.674374 | -0.299281 |
| C | -4.261961 | 0.396196  | -3.575765 | C | 0.702278 | -5.556654 | 1.125240  |
| C | -5.778141 | 1.681087  | -2.113682 | C | 1.393585 | -4.538005 | 1.774396  |
| C | -6.686836 | -0.183787 | -1.013466 | C | 3.893123 | -1.669538 | -4.580968 |
| C | -5.486983 | 0.504272  | -2.911008 | C | 4.275016 | -2.885354 | -5.146300 |
| C | -6.048046 | -0.648518 | -2.230842 | C | 4.203116 | -4.074184 | -4.346733 |
| C | -5.193742 | 1.641553  | 2.356696  | C | 3.749535 | -3.975608 | -3.031947 |
| C | -4.631814 | 2.794220  | 1.677390  | C | 1.985485 | 3.212611  | -3.398268 |
| C | -5.308427 | 2.935759  | 0.401110  | C | 1.326712 | 3.066863  | -4.615687 |
| C | -3.217337 | -1.246320 | 3.097937  | C | 1.321050 | 1.781184  | -5.251743 |
| C | -4.533325 | -0.637106 | 3.037190  | C | 1.972221 | 0.719922  | -4.630252 |
| C | -1.206041 | 2.886338  | 0.662045  | C | 3.812648 | 4.802499  | 1.272958  |
| C | -2.522539 | 3.493523  | 0.604126  | C | 4.269802 | 5.900128  | 0.543910  |
| C | -4.594087 | 3.345432  | -0.728349 | C | 4.336280 | 5.803391  | -0.885419 |
| C | -3.561600 | 2.594503  | -2.699720 | C | 3.944140 | 4.614111  | -1.499478 |
| C | -4.832959 | 2.706060  | -2.009363 | C | 1.431688 | 1.369114  | 4.663363  |
| C | 2.200904  | -3.607710 | 1.085863  | C | 0.735940 | 2.507431  | 5.058103  |
| C | 2.303566  | -3.714426 | -0.339475 | C | 0.848749 | 3.698234  | 4.265750  |
| C | 2.927374  | -2.647678 | -1.082532 | C | 1.648809 | 3.676127  | 3.127372  |



|   |           |           |           |                              |           |           |           |
|---|-----------|-----------|-----------|------------------------------|-----------|-----------|-----------|
| H | 3.339680  | -4.474082 | 3.472786  | H                            | -1.548988 | -7.753076 | 3.074494  |
| H | 3.373450  | -0.033738 | 5.647542  | C                            | -0.546165 | -7.478291 | -1.647858 |
| H | 1.609293  | -4.809688 | -2.068592 | H                            | -1.101766 | -8.206596 | -2.194550 |
| H | 1.230454  | -4.415995 | 2.837361  |                              |           |           |           |
| H | 4.016594  | -0.769812 | -5.171562 |                              |           |           |           |
| H | 3.762366  | -4.868559 | -2.418870 |                              |           |           |           |
| H | 1.909234  | 4.167917  | -2.895074 | 168                          |           |           |           |
| H | 1.882576  | -0.259963 | -5.081465 | CH3 substituted heterodimers |           |           |           |
| H | 3.826191  | 4.865243  | 2.354471  | C                            | 1.307742  | 2.983907  | 0.452654  |
| H | 4.058929  | 4.531109  | -2.573543 | C                            | 2.666633  | 3.451469  | 0.261203  |
| H | 1.267799  | 0.458452  | 5.225034  | C                            | 3.628862  | 3.232780  | 1.253273  |
| H | 1.651751  | 4.556427  | 2.497797  | C                            | 1.957138  | 2.080658  | 2.656831  |
| C | 3.884388  | -4.604389 | 6.040420  | C                            | 0.962308  | 2.308327  | 1.627431  |
| C | 3.903469  | -1.989589 | 7.321901  | C                            | 3.011484  | 3.271915  | -1.138528 |
| C | -0.123381 | 2.452835  | 6.190303  | C                            | 4.970124  | 2.821395  | 0.882224  |
| C | 0.104380  | 4.868088  | 4.582350  | C                            | 1.715763  | 0.768014  | 3.232681  |
| C | 4.692260  | 7.075344  | 1.225421  | C                            | 0.112842  | 1.137278  | 1.566322  |
| C | 4.824999  | 6.880061  | -1.676734 | C                            | 0.813203  | 2.515526  | -0.829635 |
| C | 0.612490  | 4.165899  | -5.167625 | C                            | 2.793855  | -0.042687 | 3.601709  |
| C | 0.602443  | 1.558857  | -6.458876 | C                            | 4.153696  | 0.427616  | 3.409156  |
| C | 4.761577  | -2.922169 | -6.482791 | C                            | 4.305104  | 2.876908  | -1.493717 |
| C | 4.617940  | -5.335086 | -4.858732 | C                            | 5.438272  | 1.869676  | 1.873150  |
| C | 0.082131  | -6.653702 | -1.021267 | C                            | 5.302770  | 2.648387  | -0.464783 |
| C | -0.159223 | -6.409596 | 1.868952  | C                            | 0.571863  | 0.186090  | 2.558169  |
| C | -0.530640 | 5.867666  | 4.837135  | C                            | -0.342895 | 0.681302  | 0.332492  |
| H | -1.092448 | 6.745090  | 5.066277  | C                            | 0.004952  | 1.380448  | -0.884763 |
| C | -0.856294 | 2.392158  | 7.152772  | C                            | 1.864284  | 2.694745  | -1.814510 |
| H | -1.504488 | 2.343417  | 7.998613  | C                            | -0.370845 | -0.735069 | 0.043268  |
| C | 4.172734  | -1.852853 | 8.495060  | C                            | 0.195621  | 0.393585  | -1.926823 |
| H | 4.410576  | -1.738220 | 9.528668  | C                            | 2.052966  | 1.739133  | -2.819706 |
| C | 4.144467  | -5.618428 | 6.649974  | C                            | 0.544009  | -1.183844 | 2.279660  |
| H | 4.374545  | -6.508245 | 7.191577  | C                            | 6.114729  | 1.516283  | -0.872085 |
| C | 4.962997  | -6.415604 | -5.284098 | C                            | -0.040572 | -0.915471 | -1.352968 |
| H | 5.268431  | -7.364288 | -5.664569 | C                            | 1.197161  | 0.568724  | -2.880944 |
| C | 5.168473  | -2.940890 | -7.623629 | C                            | 3.395326  | 1.328324  | -3.185742 |
| H | 5.528440  | -2.963401 | -8.627600 | C                            | 3.367408  | -0.094936 | -3.475093 |
| C | -0.013214 | 1.355279  | -7.482020 | C                            | 6.537858  | -0.821898 | -0.207274 |
| H | -0.556836 | 1.181152  | -8.383221 | C                            | 2.007943  | -0.564631 | -3.288282 |
| C | -0.000735 | 5.106493  | -5.622121 | C                            | 1.776241  | -1.829361 | -2.735095 |
| H | -0.541950 | 5.931837  | -6.026967 | C                            | 2.895206  | -2.668156 | -2.347455 |
| C | 5.233519  | 7.791524  | -2.362189 | C                            | 0.723820  | -2.011468 | -1.751731 |
| H | 5.594569  | 8.597573  | -2.960501 | C                            | 1.661118  | -2.025188 | 2.663563  |
| C | 5.044420  | 8.071837  | 1.817495  | C                            | 6.060399  | -1.275000 | -1.440429 |
| H | 5.356325  | 8.951911  | 2.333485  | C                            | 0.058546  | -1.653356 | 0.996669  |
| C | -0.897564 | -7.122099 | 2.512804  | C                            | 0.863686  | -2.786116 | 0.589842  |
|   |           |           |           | C                            | 5.592896  | -0.323330 | -2.431935 |

|   |           |           |           |   |           |           |           |
|---|-----------|-----------|-----------|---|-----------|-----------|-----------|
| C | 6.176389  | -1.520669 | 1.012002  | C | -3.209292 | 1.443733  | 0.377584  |
| C | 5.350231  | -2.647198 | 0.953687  | C | -3.566168 | 4.565504  | -2.448833 |
| C | 4.446392  | -0.905019 | -3.105965 | C | -3.899653 | 5.849059  | -2.043615 |
| C | 4.205479  | -2.215126 | -2.530599 | C | -3.935928 | 6.144842  | -0.654166 |
| C | 1.191625  | -2.961425 | -0.757723 | C | -3.635649 | 5.141599  | 0.254832  |
| C | 2.533114  | -3.368164 | -1.126864 | C | -1.646732 | 0.135492  | -4.818438 |
| C | 5.202916  | -2.444274 | -1.501296 | C | -0.846331 | 1.043436  | -5.489129 |
| C | 1.857744  | -3.016046 | 1.618255  | C | -0.808258 | 2.392744  | -5.041730 |
| C | 4.298142  | -2.828609 | 1.936873  | C | -1.574220 | 2.759559  | -3.949399 |
| C | 4.854415  | -3.117658 | -0.326681 | C | -3.823779 | -4.190906 | -2.775131 |
| C | 3.151490  | -3.411600 | 1.263016  | C | -4.161268 | -4.455686 | -4.093776 |
| C | 3.495448  | -3.590482 | -0.135287 | C | -4.103620 | -3.401188 | -5.044988 |
| C | 6.566509  | 0.600323  | 0.082150  | C | -3.714939 | -2.138113 | -4.625707 |
| C | 6.221276  | 0.780393  | 1.480358  | C | -1.939504 | -4.156560 | 2.269113  |
| C | 5.980679  | -0.530620 | 2.054417  | C | -1.228269 | -5.259630 | 1.829895  |
| C | 4.500849  | 1.887529  | -2.536824 | C | -1.213130 | -5.560642 | 0.440633  |
| C | 5.619587  | 1.046273  | -2.152899 | C | -1.903677 | -4.739243 | -0.432434 |
| C | 3.267431  | 2.533708  | 2.472950  | C | -3.904633 | -0.100610 | -4.974786 |
| C | 4.385945  | 1.690818  | 2.856414  | C | -4.316802 | -1.088860 | 5.856443  |
| C | 4.966047  | -0.703844 | 3.000676  | C | -4.340381 | -2.439422 | 5.415512  |
| C | 2.765926  | -1.465046 | 3.312486  | C | -3.950736 | -2.729554 | 4.116681  |
| C | 4.108645  | -1.873711 | 2.940958  | C | -1.735208 | 4.132327  | 2.455446  |
| C | -2.379658 | 1.840470  | -3.233381 | C | -1.017183 | 4.251845  | 3.632160  |
| C | -2.413353 | 0.482944  | -3.679590 | C | -1.065571 | 3.193667  | 4.580553  |
| C | -3.021434 | -0.521639 | -2.840896 | C | -1.829569 | 2.075242  | 4.298291  |
| C | -3.352908 | -1.854803 | -3.288812 | H | -3.600046 | 4.329108  | -3.507663 |
| C | -3.407080 | -2.913926 | -2.334909 | H | -3.724810 | 5.357100  | 1.314915  |
| C | -3.127325 | -2.625035 | -0.946474 | H | -1.595642 | -0.906075 | -5.114703 |
| C | -2.618553 | -3.592610 | -0.007408 | H | -1.473180 | 3.769834  | -3.569002 |
| C | -2.640974 | -3.293545 | 1.390710  | H | -3.928177 | -4.984020 | -2.041676 |
| C | -3.181375 | -2.032959 | 1.835878  | H | -3.735463 | -1.323453 | -5.342530 |
| C | -3.513447 | -1.736544 | 3.210842  | H | -1.876936 | -3.891583 | 3.318597  |
| C | -3.490530 | -0.380980 | 3.652811  | H | -1.808863 | -4.930409 | -1.495465 |
| C | -3.136539 | 0.658582  | 2.712392  | H | -3.946163 | 0.934800  | 5.297720  |
| C | -2.552367 | 1.921970  | 3.089042  | H | -4.028997 | -3.754312 | 3.767389  |
| C | -2.503031 | 2.985450  | 2.134788  | H | -1.617223 | 4.906440  | 1.705778  |
| C | -3.030610 | 2.773491  | 0.810189  | H | -1.792140 | 1.242076  | 4.991059  |
| C | -3.275445 | 3.833653  | -0.141781 | C | -0.121524 | 5.442643  | 3.860769  |
| C | -3.240681 | 3.536261  | -1.536095 | H | -0.373866 | 5.961308  | 4.795492  |
| C | -2.965376 | 2.182561  | -1.960033 | H | 0.927842  | 5.128085  | 3.946916  |
| C | -3.175752 | 1.143638  | -1.031404 | H | -0.199421 | 6.156595  | 3.034608  |
| C | -3.200153 | -0.221035 | -1.475457 | C | -0.232001 | 3.252132  | 5.835810  |
| C | -3.257511 | -1.290204 | -0.512094 | H | 0.836820  | 3.324759  | 5.592216  |
| C | -3.287812 | -0.991994 | 0.892314  | H | -0.480063 | 4.136048  | 6.438835  |
| C | -3.264385 | 0.376841  | 1.338083  | H | -0.384109 | 2.358599  | 6.449754  |

|                             |           |           |           |   |           |           |           |
|-----------------------------|-----------|-----------|-----------|---|-----------|-----------|-----------|
| C                           | -4.771887 | -0.730142 | 7.249465  | C | 0.453917  | -1.307205 | 1.512359  |
| H                           | -5.812272 | -1.039259 | 7.420215  | C | 1.067718  | -2.528823 | 1.227790  |
| H                           | -4.164232 | -1.242132 | 8.008259  | C | 0.473031  | -2.303274 | -1.159943 |
| H                           | -4.700392 | 0.348877  | 7.420189  | C | -0.154579 | -1.033074 | -0.862312 |
| C                           | -4.820598 | -3.537414 | 6.332126  | C | 1.073880  | -0.369360 | 2.429159  |
| H                           | -4.204926 | -3.592570 | 7.240471  | C | 2.338181  | -2.859145 | 1.845399  |
| H                           | -5.852577 | -3.357285 | 6.663523  | C | 1.121980  | -2.182597 | -2.452644 |
| H                           | -4.784308 | -4.510141 | 5.831046  | C | 0.090096  | -0.130968 | -1.968799 |
| C                           | -0.414582 | -6.080431 | 2.797967  | C | 0.077432  | 0.856157  | 0.698813  |
| H                           | -0.711945 | -7.137526 | 2.773554  | C | 2.359570  | -2.794203 | -2.665944 |
| H                           | 0.652467  | -6.045812 | 2.538541  | C | 2.989225  | -3.554523 | -1.601177 |
| H                           | -0.530574 | -5.710324 | 3.821763  | C | 2.299332  | -0.685611 | 3.020297  |
| C                           | -0.382979 | -6.703865 | -0.086538 | C | 3.138696  | -3.567330 | 0.863650  |
| H                           | 0.679256  | -6.561497 | 0.155934  | C | 2.943114  | -1.953025 | 2.721812  |
| H                           | -0.684394 | -7.658641 | 0.365131  | C | 0.883201  | -0.840021 | -2.952294 |
| H                           | -0.478715 | -6.788126 | -1.173756 | C | 0.316842  | 1.227233  | -1.724145 |
| C                           | -4.623143 | -5.832342 | -4.503904 | C | 0.309377  | 1.728420  | -0.363943 |
| H                           | -5.631951 | -5.799722 | -4.937383 | C | 0.834304  | 0.971118  | 1.927541  |
| H                           | -3.964868 | -6.258271 | -5.273777 | C | 1.352131  | 1.933353  | -2.453415 |
| H                           | -4.636874 | -6.513252 | -3.646743 | C | 1.333339  | 2.747669  | -0.249601 |
| C                           | -4.499690 | -3.642682 | -6.480639 | C | 1.826233  | 1.950217  | 2.036052  |
| H                           | -3.858878 | -4.405324 | -6.944412 | C | 1.886542  | -0.161446 | -3.650299 |
| H                           | -5.531044 | -4.014462 | -6.551605 | C | 4.373375  | -1.720055 | 2.651881  |
| H                           | -4.422578 | -2.723040 | -7.069568 | C | 1.981124  | 2.873548  | -1.541427 |
| C                           | 0.043034  | 0.588886  | -6.618398 | C | 2.079702  | 2.854488  | 0.928150  |
| H                           | -0.159037 | 1.152478  | -7.539336 | C | 3.098767  | 1.622671  | 2.651072  |
| H                           | 1.100793  | 0.755288  | -6.371926 | C | 4.139191  | 2.324479  | 1.922604  |
| H                           | -0.097667 | -0.476905 | -6.824696 | C | 6.185533  | -1.698257 | 0.977588  |
| C                           | 0.118049  | 3.387716  | -5.693340 | C | 3.509513  | 3.085211  | 0.858679  |
| H                           | 1.162853  | 3.056452  | -5.616426 | C | 4.136941  | 3.200414  | -0.385260 |
| H                           | -0.101536 | 3.496573  | -6.764130 | C | 5.419613  | 2.560296  | -0.612214 |
| H                           | 0.034473  | 4.370849  | -5.219202 | C | 3.360252  | 3.091440  | -1.606161 |
| C                           | -4.258212 | 6.903760  | -3.060940 | C | 3.169727  | -0.800866 | -3.876199 |
| H                           | -5.269542 | 7.296237  | -2.887509 | C | 6.416322  | -0.341750 | 1.222166  |
| H                           | -3.574369 | 7.761624  | -2.999150 | C | 2.125075  | 1.247952  | -3.396533 |
| H                           | -4.213373 | 6.499983  | -4.077553 | C | 3.556604  | 1.479128  | -3.465064 |
| C                           | -4.334895 | 7.517822  | -0.171951 | C | 5.613477  | 0.365520  | 2.202526  |
| H                           | -3.647281 | 8.286262  | -0.551421 | C | 6.200272  | -2.202528 | -0.382620 |
| H                           | -5.337393 | 7.789254  | -0.529904 | C | 6.444677  | -1.332366 | -1.447994 |
| H                           | -4.334089 | 7.564462  | 0.921846  | C | 5.372416  | 1.706298  | 1.701916  |
|                             |           |           |           | C | 6.025524  | 1.827344  | 0.411767  |
|                             |           |           |           | C | 4.162090  | 2.382415  | -2.587192 |
|                             |           |           |           | C | 5.435473  | 2.055459  | -1.972526 |
|                             |           |           |           | C | 6.671332  | 0.562117  | 0.115394  |
|                             |           |           |           | C | 4.201044  | 0.213322  | -3.762867 |
| 144                         |           |           |           |   |           |           |           |
| CN substituted_heterodimers |           |           |           |   |           |           |           |
| C                           | -0.155790 | -0.547146 | 0.444767  |   |           |           |           |

|   |           |           |           |   |           |           |           |
|---|-----------|-----------|-----------|---|-----------|-----------|-----------|
| C | 5.667059  | -1.442565 | -2.668278 | C | -1.008653 | 4.230894  | 2.545024  |
| C | 6.685255  | 0.075726  | -1.194809 | C | -4.030127 | 2.589151  | -4.020374 |
| C | 5.425939  | -0.102274 | -3.168823 | C | -4.376611 | 3.897621  | -4.341486 |
| C | 6.055750  | 0.836202  | -2.258363 | C | -4.191840 | 4.928238  | -3.371266 |
| C | 5.144424  | -2.400309 | 1.705252  | C | -3.665807 | 4.604778  | -2.124548 |
| C | 4.515743  | -3.339237 | 0.794474  | C | -2.354424 | -2.510322 | -3.755007 |
| C | 5.167875  | -3.216479 | -0.496181 | C | -1.747122 | -2.191348 | -4.962606 |
| C | 3.330382  | 0.329617  | 3.132236  | C | -1.690972 | -0.827376 | -5.379635 |
| C | 4.612402  | -0.310769 | 2.904953  | C | -2.242493 | 0.155508  | -4.568723 |
| C | 1.079077  | -3.035686 | -0.132227 | C | -4.095871 | -4.728112 | 0.696931  |
| C | 2.361498  | -3.675945 | -0.357801 | C | -4.674375 | -5.644682 | -0.176381 |
| C | 4.419780  | -3.322974 | -1.671736 | C | -4.796374 | -5.312175 | -1.558834 |
| C | 3.401253  | -2.091683 | -3.392959 | C | -4.337099 | -4.077076 | -2.006737 |
| C | 4.673919  | -2.419335 | -2.778231 | C | -1.264598 | -2.051529 | 4.421988  |
| C | -1.913034 | 3.477922  | 1.765089  | C | -0.630265 | -3.277712 | 4.567331  |
| C | -2.085076 | 3.824093  | 0.385585  | C | -0.881073 | -4.311976 | 3.615476  |
| C | -2.815911 | 2.931793  | -0.478438 | C | -1.748127 | -4.069612 | 2.558974  |
| C | -3.289410 | 3.286453  | -1.796251 | H | -2.881054 | 4.003155  | 4.325984  |
| C | -3.479286 | 2.252863  | -2.766850 | H | -3.069284 | -0.736033 | 5.752964  |
| C | -3.205038 | 0.884733  | -2.396527 | H | -1.407746 | 5.144326  | -1.191032 |
| C | -2.849998 | -0.152065 | -3.332221 | H | -0.791923 | 3.925569  | 3.560475  |
| C | -2.910612 | -1.520911 | -2.915576 | H | -4.239428 | 1.808279  | -4.741410 |
| C | -3.337621 | -1.831623 | -1.574395 | H | -3.593368 | 5.385356  | -1.376945 |
| C | -3.734674 | -3.148837 | -1.134169 | H | -2.311834 | -3.538424 | -3.419101 |
| C | -3.608355 | -3.484018 | 0.250256  | H | -2.108779 | 1.189500  | -4.859488 |
| C | -3.076389 | -2.498518 | 1.164214  | H | -4.066509 | -4.967342 | 1.753165  |
| C | -2.385454 | -2.820702 | 2.386653  | H | -4.496604 | -3.812749 | -3.045089 |
| C | -2.142769 | -1.787160 | 3.347754  | H | -0.997024 | -1.256306 | 5.105459  |
| C | -2.613833 | -0.451010 | 3.082890  | H | -1.853626 | -4.836777 | 1.803054  |
| C | -2.709048 | 0.587537  | 4.082566  | C | -3.300276 | 3.728948  | 6.902594  |
| C | -2.654010 | 1.955865  | 3.670288  | N | -3.473587 | 4.610759  | 7.639472  |
| C | -2.497389 | 2.259665  | 2.266613  | C | -3.409418 | 0.942923  | 7.741965  |
| C | -2.845213 | 1.264019  | 1.334080  | N | -3.629428 | 0.627993  | 8.838786  |
| C | -2.993226 | 1.600793  | -0.052737 | C | 0.322722  | -3.451814 | 5.617975  |
| C | -3.195348 | 0.563211  | -1.025723 | N | 1.103416  | -3.565392 | 6.471312  |
| C | -3.271416 | -0.808062 | -0.610831 | C | -0.192580 | -5.562499 | 3.682565  |
| C | -3.137499 | -1.145171 | 0.780115  | N | 0.366239  | -6.581100 | 3.709933  |
| C | -2.912763 | -0.111905 | 1.749616  | C | -5.172251 | -6.882693 | 0.336209  |
| C | -2.854305 | 2.964899  | 4.633780  | N | -5.568427 | -7.882475 | 0.776788  |
| C | -3.082003 | 2.664820  | 5.973377  | C | -5.420067 | -6.205184 | -2.484646 |
| C | -3.135615 | 1.299309  | 6.384949  | N | -5.922209 | -6.914291 | -3.256406 |
| C | -2.959962 | 0.294725  | 5.438289  | C | -1.115832 | -3.224290 | -5.721919 |
| C | -1.358322 | 4.918186  | -0.133905 | N | -0.597166 | -4.078023 | -6.315819 |
| C | -0.474462 | 5.650791  | 0.646720  | C | -1.000494 | -0.444647 | -6.570824 |
| C | -0.291270 | 5.295742  | 2.016565  | N | -0.432042 | -0.108902 | -7.527226 |

|   |           |          |           |
|---|-----------|----------|-----------|
| C | -4.952044 | 4.176550 | -5.620022 |
| N | -5.416291 | 4.378783 | -6.666040 |
| C | -4.576869 | 6.278364 | -3.640316 |
| N | -4.880821 | 7.382850 | -3.842519 |
| C | 0.303276  | 6.684662 | 0.039715  |
| N | 0.935387  | 7.511684 | -0.477051 |
| C | 0.678612  | 5.957185 | 2.831204  |
| N | 1.472401  | 6.468729 | 3.508591  |

132

F substituted heterodimers

|   |           |           |           |
|---|-----------|-----------|-----------|
| C | -3.395853 | -3.474137 | -1.380258 |
| C | -3.400296 | -2.692601 | -2.577816 |
| C | -3.069001 | -1.288255 | -2.501643 |
| C | -2.551556 | -0.520759 | -3.608046 |
| C | -2.555221 | 0.909669  | -3.530957 |
| C | -3.072093 | 1.551102  | -2.346920 |
| C | -3.409797 | 2.954169  | -2.268893 |
| C | -3.404044 | 3.600608  | -0.993629 |
| C | -3.052683 | 2.834454  | 0.180980  |
| C | -2.510650 | 3.410023  | 1.386337  |
| C | -2.473902 | 2.623942  | 2.583775  |
| C | -2.994989 | 1.279146  | 2.562932  |
| C | -3.302893 | 0.513400  | 3.749878  |
| C | -3.312569 | -0.914327 | 3.671860  |
| C | -3.010636 | -1.550898 | 2.409899  |
| C | -2.490559 | -2.890681 | 2.288499  |
| C | -2.517074 | -3.541743 | 1.012122  |
| C | -3.051892 | -2.838646 | -0.127460 |
| C | -3.172977 | -1.437546 | -0.044992 |
| C | -3.182205 | -0.651245 | -1.250699 |
| C | -3.181565 | 0.781505  | -1.172727 |
| C | -3.168463 | 1.432452  | 0.110932  |
| C | -3.145637 | 0.648067  | 1.313416  |
| C | -3.153514 | -0.788238 | 1.235347  |
| C | -1.848992 | -4.783345 | 0.868118  |
| C | -1.185261 | -5.357895 | 1.925826  |
| C | -1.152069 | -4.714315 | 3.176899  |
| C | -1.789171 | -3.508940 | 3.353734  |
| C | -3.830831 | -3.293118 | -3.784440 |
| C | -4.225682 | -4.612256 | -3.815284 |
| C | -4.225887 | -5.380004 | -2.636259 |
| C | -3.828590 | -4.819596 | -1.442321 |
| C | -1.875992 | 1.647884  | -4.531296 |

|   |           |           |           |
|---|-----------|-----------|-----------|
| C | -1.219243 | 1.010059  | -5.557144 |
| C | -1.212944 | -0.395291 | -5.631194 |
| C | -1.865511 | -1.143373 | -4.679756 |
| C | -3.842519 | 4.942802  | -0.906830 |
| C | -4.250333 | 5.626963  | -2.030701 |
| C | -4.253866 | 4.991388  | -3.285888 |
| C | -3.850674 | 3.679289  | -3.400810 |
| C | -1.764035 | 3.122283  | 3.704420  |
| C | -1.126012 | 4.339067  | 3.654272  |
| C | -1.166177 | 5.113718  | 2.479958  |
| C | -1.840344 | 4.658749  | 1.371696  |
| C | -3.719298 | -1.657698 | 4.804660  |
| C | -4.081313 | -1.024145 | 5.972825  |
| C | -4.071036 | 0.380595  | 6.050117  |
| C | -3.699625 | 1.133546  | 4.958083  |
| H | -1.768179 | -5.263613 | -0.098480 |
| H | -1.665634 | -3.007125 | 4.304928  |
| H | -3.910669 | -2.712697 | -4.695679 |
| H | -3.909850 | -5.419217 | -0.543854 |
| H | -1.779722 | 2.723918  | -4.461523 |
| H | -1.762710 | -2.220158 | -4.725538 |
| H | -3.920169 | 5.440899  | 0.052008  |
| H | -3.934104 | 3.200234  | -4.368873 |
| H | -1.635698 | 2.519635  | 4.594540  |
| H | -1.765071 | 5.240191  | 0.461914  |
| H | -3.807817 | -2.736387 | 4.758768  |
| H | -3.774035 | 2.211782  | 5.030615  |
| C | 1.482183  | 3.126149  | -0.218504 |
| C | 2.853235  | 3.507839  | -0.498380 |
| C | 3.815370  | 3.448082  | 0.514806  |
| C | 2.122134  | 2.636300  | 2.116862  |
| C | 1.125980  | 2.696037  | 1.064018  |
| C | 3.181387  | 3.057287  | -1.839286 |
| C | 5.141771  | 2.935765  | 0.225805  |
| C | 1.847773  | 1.463075  | 2.929033  |
| C | 0.242357  | 1.558954  | 1.225466  |
| C | 0.963821  | 2.437660  | -1.388343 |
| C | 2.904394  | 0.703467  | 3.441361  |
| C | 4.275732  | 1.087962  | 3.160768  |
| C | 4.459565  | 2.563130  | -2.116205 |
| C | 5.589919  | 2.174916  | 1.377527  |
| C | 5.458241  | 2.502287  | -1.064792 |
| C | 0.682865  | 0.798386  | 2.378325  |
| C | -0.239578 | 0.893131  | 0.100083  |
| C | 0.116128  | 1.340674  | -1.229656 |

|   |           |           |           |                              |           |           |           |
|---|-----------|-----------|-----------|------------------------------|-----------|-----------|-----------|
| C | 2.013505  | 2.395819  | -2.390716 | F                            | -0.482124 | 6.273499  | 2.432181  |
| C | -0.302758 | -0.550771 | 0.083369  | F                            | -4.474397 | 0.981705  | 7.186831  |
| C | 0.272085  | 0.167811  | -2.068011 | F                            | -4.494328 | -1.740781 | 7.036763  |
| C | 2.166187  | 1.263699  | -3.198629 | F                            | -0.439973 | -5.261838 | 4.181113  |
| C | 0.614062  | -0.598296 | 2.364264  | F                            | -0.502918 | -6.507625 | 1.757932  |
| C | 6.234140  | 1.290296  | -1.253358 | F                            | -4.662834 | -6.653986 | -2.678669 |
| C | 0.006609  | -1.001356 | -1.254664 | F                            | -4.660627 | -5.166792 | -4.963838 |
| C | 1.275249  | 0.128540  | -3.037162 | F                            | -0.523609 | 1.721026  | -6.466136 |
| C | 3.492851  | 0.750985  | -3.484634 | F                            | -0.510464 | -1.000277 | -6.609003 |
| C | 3.421432  | -0.699312 | -3.500884 |                              |           |           |           |
| C | 6.594539  | -0.892136 | -0.160287 |                              |           |           |           |
| C | 2.050515  | -1.085284 | -3.225287 |                              |           |           |           |
| C | 1.786920  | -2.215052 | -2.442992 | 132                          |           |           |           |
| C | 2.883607  | -3.000081 | -1.906586 | F24 substituted heterodimers |           |           |           |
| C | 0.738449  | -2.174850 | -1.439971 | C                            | 5.382089  | 1.124628  | 2.800770  |
| C | 1.707758  | -1.387001 | 2.898716  | C                            | 5.702448  | -0.235655 | 2.774795  |
| C | 6.093580  | -1.554858 | -1.284473 | C                            | 4.040128  | 1.547920  | 3.155772  |
| C | 0.108028  | -1.284894 | 1.192415  | C                            | 5.868532  | 2.005289  | 1.754836  |
| C | 0.873805  | -2.499287 | 1.005544  | C                            | 4.692611  | -1.225977 | 3.101944  |
| C | 5.646021  | -0.793625 | -2.435943 | C                            | 6.520216  | -0.767852 | 1.700676  |
| C | 6.222346  | -1.337456 | 1.169883  | C                            | 3.697179  | 2.690059  | 2.328988  |
| C | 5.363681  | -2.429125 | 1.326755  | C                            | 3.067922  | 0.594181  | 3.472007  |
| C | 4.477971  | -1.456631 | -2.985570 | C                            | 4.826729  | 2.972663  | 1.462573  |
| C | 4.204150  | -2.627959 | -2.174085 | C                            | 6.656444  | 1.492417  | 0.720534  |
| C | 1.185661  | -2.934941 | -0.286051 | C                            | 3.400028  | -0.819299 | 3.444916  |
| C | 2.511176  | -3.444961 | -0.574914 | C                            | 4.886643  | -2.369381 | 2.229626  |
| C | 5.202509  | -2.688591 | -1.122025 | C                            | 6.988713  | 0.079959  | 0.692961  |
| C | 1.867186  | -2.562793 | 2.059206  | C                            | 6.016245  | -2.086379 | 1.363675  |
| C | 4.313801  | -2.388840 | 2.327738  | C                            | 2.393144  | 2.839869  | 1.848195  |
| C | 4.843790  | -3.117092 | 0.159161  | C                            | 1.716034  | 0.746758  | 2.971529  |
| C | 3.145789  | -3.053778 | 1.779233  | C                            | 4.610669  | 3.391119  | 0.146326  |
| C | 3.473011  | -3.503306 | 0.438932  | C                            | 6.432070  | 1.927116  | -0.645784 |
| C | 6.665686  | 0.557311  | -0.144381 | C                            | 2.252459  | -1.542017 | 2.928973  |
| C | 6.337357  | 1.007778  | 1.195675  | C                            | 3.781261  | -3.065668 | 1.731614  |
| C | 6.063178  | -0.163126 | 2.007741  | C                            | 6.970525  | -0.358081 | -0.690403 |
| C | 4.618074  | 1.388979  | -2.954121 | C                            | 5.998803  | -2.508281 | 0.031386  |
| C | 5.715068  | 0.602257  | -2.421058 | C                            | 1.387451  | 1.846969  | 2.173888  |
| C | 3.443281  | 3.003641  | 1.845282  | C                            | 2.168695  | 3.275121  | 0.480396  |
| C | 4.540041  | 2.215994  | 2.378649  | C                            | 1.212434  | -0.573079 | 2.635965  |
| C | 5.051525  | -0.124017 | 2.971483  | C                            | 5.428819  | 2.858303  | -0.927434 |
| C | 2.833288  | -0.746469 | 3.425760  | C                            | 3.257104  | 3.544774  | -0.354763 |
| C | 4.160612  | -1.257703 | 3.134917  | C                            | 6.626958  | 0.783649  | -1.517832 |
| F | -4.694224 | 6.895451  | -1.932103 | C                            | 2.439749  | -2.643997 | 2.087824  |
| F | -4.700877 | 5.663636  | -4.364853 | C                            | 3.763110  | -3.504044 | 0.347414  |
| F | -0.405597 | 4.774186  | 4.706515  | C                            | 6.484501  | -1.627783 | -1.015001 |
|   |           |           |           | C                            | 4.850990  | -3.229591 | -0.486663 |

|   |           |           |           |   |           |           |           |
|---|-----------|-----------|-----------|---|-----------|-----------|-----------|
| C | 0.546354  | 1.669158  | 1.006875  | C | -1.335718 | 2.192186  | 4.185308  |
| C | 1.023625  | 2.552716  | -0.039168 | C | -3.695392 | 0.064160  | 4.960969  |
| C | 0.407938  | -0.741748 | 1.508784  | C | -2.724270 | -0.738961 | -2.734625 |
| C | 4.581475  | 2.682429  | -2.092463 | C | -3.192393 | 3.324914  | -1.617320 |
| C | 3.239182  | 3.106687  | -1.738784 | C | -2.140675 | 1.622048  | -3.237829 |
| C | 5.810704  | 0.613747  | -2.639651 | C | -1.371682 | 4.168477  | 2.234775  |
| C | 1.594443  | -2.819536 | 0.920674  | C | -3.769071 | 4.923744  | 0.140122  |
| C | 2.410314  | -3.353884 | -0.154498 | C | -2.106918 | -3.643694 | 0.210436  |
| C | 5.637235  | -1.804654 | -2.179802 | C | -3.137911 | -3.096998 | -2.084383 |
| C | 4.627490  | -2.795141 | -1.853202 | C | -3.692071 | -2.615458 | 4.225556  |
| C | 0.077600  | 0.397948  | 0.680638  | C | -1.313843 | -4.037372 | 2.493668  |
| C | 1.007521  | 2.130082  | -1.371811 | C | -0.615352 | 3.358831  | 4.375605  |
| C | 0.599475  | -1.883513 | 0.637607  | F | -1.132388 | 1.208634  | 5.082720  |
| C | 4.769127  | 1.581005  | -2.932717 | C | -4.190572 | -0.889820 | 5.837192  |
| C | 2.133521  | 2.413557  | -2.240192 | F | -3.844141 | 1.356519  | 5.310212  |
| C | 5.306146  | -0.704731 | -2.976275 | C | -2.127793 | 0.231762  | -3.618319 |
| C | 2.194484  | -2.935768 | -1.471950 | C | -3.140467 | -2.076296 | -3.094850 |
| C | 3.324035  | -2.650304 | -2.336897 | C | -3.760709 | 4.218535  | -2.547495 |
| C | 0.061061  | -0.038256 | -0.697555 | C | -1.358035 | 2.528039  | -3.989714 |
| C | 0.512612  | 0.809702  | -1.707017 | C | -0.634363 | 4.357574  | 3.391080  |
| C | 0.379976  | -1.449032 | -0.726664 | F | -1.206644 | 5.084718  | 1.261590  |
| C | 3.621435  | 0.859740  | -3.451642 | C | -4.281297 | 5.802390  | -0.802585 |
| C | 2.328453  | 1.268785  | -3.113273 | F | -3.917040 | 5.255791  | 1.437165  |
| C | 3.953139  | -0.552903 | -3.478292 | C | -1.306227 | -4.735808 | -0.193389 |
| C | 1.154710  | -1.966666 | -1.764975 | C | -3.689346 | -4.355261 | -2.400164 |
| C | 2.980881  | -1.507446 | -3.164422 | C | -4.189263 | -2.243779 | 5.465492  |
| C | 1.322865  | 0.276965  | -2.783902 | F | -3.837747 | -3.905034 | 3.865345  |
| C | 1.640033  | -1.084463 | -2.811067 | C | -0.572758 | -5.126827 | 2.069283  |
| C | -2.846029 | 0.346500  | 1.387861  | F | -1.128004 | -3.646514 | 3.769630  |
| C | -2.861775 | 1.363531  | 0.382369  | F | 0.178432  | 3.504515  | 5.442720  |
| C | -2.836344 | -1.037215 | 1.010502  | F | -4.727945 | -0.529366 | 7.008749  |
| C | -2.724087 | 0.699832  | 2.743409  | C | -1.332074 | -0.150742 | -4.721736 |
| C | -2.861617 | 0.998871  | -1.004182 | C | -3.693718 | -2.381176 | -4.355153 |
| C | -2.756823 | 2.716714  | 0.747364  | C | -4.276972 | 5.446128  | -2.160686 |
| C | -2.838797 | -1.400756 | -0.372206 | F | -3.901375 | 3.870700  | -3.841288 |
| C | -2.713232 | -2.029508 | 1.998500  | C | -0.618894 | 2.123131  | -5.087746 |
| C | -2.131267 | 1.981574  | 3.036755  | F | -1.191322 | 3.803478  | -3.590714 |
| C | -3.140822 | -0.288458 | 3.713625  | F | 0.136315  | 5.441227  | 3.540269  |
| C | -2.848110 | -0.380617 | -1.380753 | F | -4.836978 | 6.960886  | -0.427576 |
| C | -2.751892 | 1.997948  | -1.986767 | C | -0.567868 | -5.479054 | 0.711742  |
| C | -2.148607 | 3.006415  | 2.022984  | F | -1.120503 | -5.020506 | -1.496979 |
| C | -3.196594 | 3.689599  | -0.228160 | C | -4.186322 | -4.640092 | -3.663150 |
| C | -2.714571 | -2.750063 | -0.745837 | F | -3.831634 | -5.303307 | -1.454213 |
| C | -3.138137 | -1.674263 | 3.334143  | F | -4.725534 | -3.152870 | 6.288451  |
| C | -2.109176 | -3.279655 | 1.604752  | F | 0.216311  | -5.790712 | 2.922125  |

|   |           |           |           |
|---|-----------|-----------|-----------|
| C | -0.605496 | 0.769821  | -5.456977 |
| F | -1.134350 | -1.448517 | -5.022245 |
| C | -4.188347 | -3.642550 | -4.651025 |
| F | -3.842707 | -1.426456 | -5.293475 |
| F | -4.828656 | 6.270559  | -3.059284 |
| F | 0.155427  | 2.991565  | -5.748474 |
| F | 0.223450  | -6.474026 | 0.294485  |
| F | -4.721265 | -5.836635 | -3.934114 |
| F | 0.188476  | 0.370796  | -6.457176 |
| F | -4.725405 | -3.903104 | -5.848922 |

132

H substituted heterodimers

|   |           |           |           |
|---|-----------|-----------|-----------|
| C | -3.753046 | -2.758992 | -2.529246 |
| C | -3.760085 | -1.603107 | -3.372942 |
| C | -3.413838 | -0.317586 | -2.807255 |
| C | -2.911032 | 0.796205  | -3.576331 |
| C | -2.918008 | 2.107609  | -2.997284 |
| C | -3.424024 | 2.284122  | -1.656682 |
| C | -3.783472 | 3.564112  | -1.085821 |
| C | -3.778561 | 3.716577  | 0.336884  |
| C | -3.409355 | 2.587963  | 1.163778  |
| C | -2.881905 | 2.702908  | 2.501682  |
| C | -2.848294 | 1.542771  | 3.343591  |
| C | -3.359162 | 0.289484  | 2.840982  |
| C | -3.686611 | -0.846096 | 3.675990  |
| C | -3.693356 | -2.154691 | 3.097161  |
| C | -3.367948 | -2.304412 | 1.695378  |
| C | -2.854232 | -3.520248 | 1.110672  |
| C | -2.873361 | -3.676316 | -0.314759 |
| C | -3.395576 | -2.609576 | -1.134410 |
| C | -3.508096 | -1.327787 | -0.561785 |
| C | -3.516110 | -0.165068 | -1.411422 |
| C | -3.518744 | 1.147721  | -0.831014 |
| C | -3.509819 | 1.301290  | 0.600478  |
| C | -3.491283 | 0.141544  | 1.447791  |
| C | -3.495780 | -1.174477 | 0.866050  |
| C | -2.217885 | -4.800462 | -0.879818 |
| C | -1.582722 | -5.741577 | -0.092036 |
| C | -1.558038 | -5.584744 | 1.305978  |
| C | -2.174009 | -4.492909 | 1.888133  |
| C | -4.220164 | -1.738722 | -4.705419 |
| C | -4.639714 | -2.959760 | -5.204884 |
| C | -4.635727 | -4.094987 | -4.375129 |

|   |           |           |           |
|---|-----------|-----------|-----------|
| C | -4.210584 | -3.988690 | -3.061860 |
| C | -2.262301 | 3.156831  | -3.690412 |
| C | -1.633230 | 2.941454  | -4.902329 |
| C | -1.624117 | 1.653850  | -5.469381 |
| C | -2.245859 | 0.607280  | -4.814344 |
| C | -4.248552 | 4.932392  | 0.889754  |
| C | -4.686825 | 5.970823  | 0.085789  |
| C | -4.689795 | 5.821732  | -1.312402 |
| C | -4.255660 | 4.636334  | -1.881073 |
| C | -2.158208 | 1.623997  | 4.580209  |
| C | -1.544646 | 2.791996  | 4.992140  |
| C | -1.583322 | 3.932694  | 4.169297  |
| C | -2.230293 | 3.881187  | 2.949094  |
| C | -4.130701 | -3.243933 | 3.888998  |
| C | -4.525090 | -3.069485 | 5.204590  |
| C | -4.517223 | -1.783812 | 5.773969  |
| C | -4.116147 | -0.696178 | 5.016921  |
| H | -2.149509 | -4.881802 | -1.957711 |
| H | -2.074797 | -4.336891 | 2.955530  |
| H | -4.294358 | -0.853331 | -5.326620 |
| H | -4.279208 | -4.850202 | -2.407451 |
| H | -2.189543 | 4.131384  | -3.222712 |
| H | -2.162339 | -0.394095 | -5.219533 |
| H | -4.316790 | 5.026166  | 1.967636  |
| H | -4.328790 | 4.500020  | -2.954116 |
| H | -2.051510 | 0.728865  | 5.181164  |
| H | -2.174694 | 4.735450  | 2.285414  |
| H | -4.208054 | -4.224993 | 3.434135  |
| H | -4.182780 | 0.300847  | 5.437286  |
| C | 1.114026  | 2.974819  | 0.943815  |
| C | 2.481659  | 3.442601  | 0.822035  |
| C | 3.447769  | 3.028318  | 1.744952  |
| C | 1.764899  | 1.675858  | 2.940486  |
| C | 0.764837  | 2.105741  | 1.982235  |
| C | 2.809563  | 3.511895  | -0.590945 |
| C | 4.776957  | 2.665921  | 1.289633  |
| C | 1.501274  | 0.286018  | 3.272131  |
| C | -0.111410 | 0.981947  | 1.721542  |
| C | 0.596767  | 2.754777  | -0.395773 |
| C | 2.564780  | -0.598975 | 3.476054  |
| C | 3.932520  | -0.128019 | 3.354033  |
| C | 4.091199  | 3.162967  | -1.028220 |
| C | 5.233887  | 1.542234  | 2.086778  |
| C | 5.093175  | 2.732756  | -0.070424 |
| C | 0.339073  | -0.142076 | 2.518414  |



|   |           |           |           |                              |           |           |           |
|---|-----------|-----------|-----------|------------------------------|-----------|-----------|-----------|
| C | -0.590071 | 0.765582  | 0.430822  | H                            | -4.863825 | -1.634988 | 6.793222  |
| C | -0.241385 | 1.667681  | -0.646009 | H                            | -1.015233 | -6.292908 | 1.926297  |
| C | 1.644460  | 3.087003  | -1.344582 | H                            | -1.058298 | -6.571089 | -0.558720 |
| C | -0.644048 | -0.574604 | -0.108964 | H                            | -5.009634 | -3.028829 | -6.224480 |
| C | -0.079447 | 0.880276  | -1.852897 | H                            | -5.003427 | -5.046915 | -4.749036 |
| C | 1.803397  | 2.325967  | -2.507863 | H                            | -1.090654 | 1.469031  | -6.397911 |
| C | 0.279595  | -1.438633 | 1.998970  | H                            | -1.106402 | 3.757438  | -5.389727 |
| C | 5.877441  | 1.677616  | -0.685641 | H                            | -5.070013 | 6.618213  | -1.946594 |
| C | -0.334782 | -0.506386 | -1.519557 | H                            | -5.065348 | 6.883086  | 0.539262  |
| C | 0.921198  | 1.203286  | -2.769806 | H                            | -1.062201 | 4.838863  | 4.466118  |
| C | 3.133446  | 1.962801  | -2.959917 | H                            | -0.993298 | 2.811228  | 5.928378  |
| C | 3.072639  | 0.616590  | -3.501514 |                              |           |           |           |
| C | 6.257079  | -0.750023 | -0.458967 |                              |           |           |           |
| C | 1.705002  | 0.146861  | -3.384796 |                              |           |           |           |
| C | 1.451769  | -1.191753 | -3.066070 |                              |           |           |           |
| C | 2.556262  | -2.108724 | -2.850756 |                              |           |           |           |
| C | 0.405448  | -1.526687 | -2.117695 |                              |           |           |           |
| C | 1.381840  | -2.357597 | 2.210440  |                              |           |           |           |
| C | 5.757713  | -0.963608 | -1.747155 |                              |           |           |           |
| C | -0.225452 | -1.657960 | 0.658019  |                              |           |           |           |
| C | 0.550315  | -2.714170 | 0.043222  |                              |           |           |           |
| C | 5.301485  | 0.160104  | -2.544067 |                              |           |           |           |
| C | 5.891887  | -1.650532 | 0.618974  |                              |           |           |           |
| C | 5.041174  | -2.731298 | 0.368846  |                              |           |           |           |
| C | 4.136847  | -0.267532 | -3.297076 |                              |           |           |           |
| C | 3.873858  | -1.655612 | -2.966028 |                              |           |           |           |
| C | 0.861829  | -2.649375 | -1.317895 |                              |           |           |           |
| C | 2.190490  | -3.009444 | -1.771443 |                              |           |           |           |
| C | 4.875432  | -2.086002 | -2.007506 |                              |           |           |           |
| C | 1.547744  | -3.146725 | 1.001380  |                              |           |           |           |
| C | 3.993728  | -3.065412 | 1.316049  |                              |           |           |           |
| C | 4.523133  | -2.952997 | -0.968988 |                              |           |           |           |
| C | 2.829017  | -3.495232 | 0.563527  |                              |           |           |           |
| C | 3.156043  | -3.425445 | -0.848535 |                              |           |           |           |
| C | 6.317612  | 0.595510  | 0.081809  |                              |           |           |           |
| C | 5.989755  | 0.526422  | 1.494033  |                              |           |           |           |
| C | 5.726528  | -0.861497 | 1.825847  |                              |           |           |           |
| C | 4.256158  | 2.374178  | -2.235019 |                              |           |           |           |
| C | 5.360382  | 1.456136  | -2.023613 |                              |           |           |           |
| C | 3.082571  | 2.128257  | 2.823287  |                              |           |           |           |
| C | 4.186581  | 1.209178  | 3.034564  |                              |           |           |           |
| C | 4.716564  | -1.182571 | 2.737717  |                              |           |           |           |
| C | 2.504083  | -1.944944 | 2.935308  |                              |           |           |           |
| C | 3.834325  | -2.305344 | 2.478784  |                              |           |           |           |
| H | -4.877934 | -3.920861 | 5.780651  |                              |           |           |           |
|   |           |           |           | 156                          |           |           |           |
|   |           |           |           | NH2 substituted heterodimers |           |           |           |
|   |           |           |           | C                            | 1.866208  | -1.078937 | 3.001267  |
|   |           |           |           | C                            | 3.279775  | -0.877559 | 3.252526  |
|   |           |           |           | C                            | 4.223900  | -1.742146 | 2.685949  |
|   |           |           |           | C                            | 2.423858  | -3.032995 | 1.595361  |
|   |           |           |           | C                            | 1.447740  | -2.134174 | 2.182441  |
|   |           |           |           | C                            | 3.531813  | 0.553013  | 3.285989  |
|   |           |           |           | C                            | 5.452345  | -1.207948 | 2.127492  |
|   |           |           |           | C                            | 1.968664  | -3.377775 | 0.258213  |
|   |           |           |           | C                            | 0.395965  | -1.925577 | 1.209178  |
|   |           |           |           | C                            | 1.243879  | 0.229175  | 2.877681  |
|   |           |           |           | C                            | 2.894644  | -3.517383 | -0.782033 |
|   |           |           |           | C                            | 4.308487  | -3.313056 | -0.524847 |
|   |           |           |           | C                            | 4.718204  | 1.065218  | 2.748644  |
|   |           |           |           | C                            | 5.777010  | -1.975331 | 0.939590  |
|   |           |           |           | C                            | 5.695817  | 0.168467  | 2.159908  |
|   |           |           |           | C                            | 0.712080  | -2.694505 | 0.023260  |
|   |           |           |           | C                            | -0.184537 | -0.665089 | 1.082262  |
|   |           |           |           | C                            | 0.240443  | 0.428817  | 1.929729  |
|   |           |           |           | C                            | 2.273578  | 1.237761  | 3.055718  |
|   |           |           |           | C                            | -0.466962 | -0.127627 | -0.226306 |
|   |           |           |           | C                            | 0.211232  | 1.642346  | 1.139409  |
|   |           |           |           | C                            | 2.246338  | 2.411132  | 2.290235  |
|   |           |           |           | C                            | 0.427905  | -2.173269 | -1.243964 |
|   |           |           |           | C                            | 6.271164  | 0.830180  | 1.003404  |
|   |           |           |           | C                            | -0.234258 | 1.297994  | -0.192841 |
|   |           |           |           | C                            | 1.188819  | 2.621698  | 1.318947  |
|   |           |           |           | C                            | 3.476823  | 2.939796  | 1.731340  |
|   |           |           |           | C                            | 3.178063  | 3.478507  | 0.414980  |
|   |           |           |           | C                            | 6.286594  | 0.630288  | -1.455956 |
|   |           |           |           | C                            | 1.763845  | 3.282719  | 0.160442  |

|   |           |           |           |   |           |           |           |
|---|-----------|-----------|-----------|---|-----------|-----------|-----------|
| C | 1.327485  | 2.947912  | -1.127572 | C | -3.083845 | -1.177279 | 3.768148  |
| C | 2.288298  | 2.801516  | -2.206148 | C | -3.048918 | 0.236767  | 3.960610  |
| C | 0.299214  | 1.942466  | -1.309993 | C | -2.855813 | 1.094810  | 2.813108  |
| C | 1.385448  | -2.317653 | -2.323015 | C | -3.144645 | 0.568489  | 1.535245  |
| C | 5.687399  | 1.887910  | -1.577020 | C | -3.231785 | 1.446934  | 0.403667  |
| C | -0.179213 | -0.865614 | -1.368759 | C | -3.336476 | 0.897554  | -0.924662 |
| C | 0.383071  | -0.204051 | -2.527902 | C | -3.370059 | -0.523146 | -1.116154 |
| C | 5.362517  | 2.654273  | -0.387733 | C | -3.301805 | -1.404908 | 0.019890  |
| C | 5.848853  | -0.465556 | -2.300921 | C | -3.183428 | -0.858407 | 1.342295  |
| C | 4.829084  | -0.264358 | -3.236209 | C | -3.266769 | 0.743011  | 5.258934  |
| C | 4.105048  | 3.339252  | -0.624345 | C | -3.493088 | -0.077418 | 6.358939  |
| C | 3.651881  | 2.993795  | -1.958426 | C | -3.565286 | -1.486977 | 6.158337  |
| C | 0.619122  | 1.174511  | -2.498172 | C | -3.362396 | -1.995689 | 4.884656  |
| C | 1.850192  | 1.704733  | -3.051935 | C | -1.621593 | 4.488115  | 1.777529  |
| C | 4.628841  | 2.097359  | -2.548101 | C | -0.752801 | 4.818780  | 2.808871  |
| C | 1.357016  | -1.098634 | -3.115950 | C | -0.609131 | 3.912647  | 3.901878  |
| C | 3.799669  | -1.271415 | -3.418139 | C | -1.382000 | 2.766156  | 3.928733  |
| C | 4.207083  | 1.041391  | -3.362748 | C | -3.949108 | 4.000077  | -2.881671 |
| C | 2.541679  | -0.588161 | -3.659732 | C | -4.287881 | 5.329788  | -2.682910 |
| C | 2.793070  | 0.842014  | -3.624383 | C | -4.182472 | 5.882945  | -1.372504 |
| C | 6.583972  | 0.091532  | -0.141736 | C | -3.785867 | 5.054881  | -0.328397 |
| C | 6.332155  | -1.337317 | -0.174664 | C | -2.036796 | -0.747731 | -4.556321 |
| C | 5.877868  | -1.681195 | -1.508991 | C | -1.326696 | 0.036529  | -5.449937 |
| C | 4.690438  | 2.280716  | 1.957695  | C | -1.344588 | 1.451905  | -5.292199 |
| C | 5.650789  | 2.136231  | 0.878443  | C | -2.030936 | 1.992583  | -4.212378 |
| C | 3.787873  | -2.838273 | 1.841750  | C | -3.960078 | -4.666874 | -1.649100 |
| C | 4.747553  | -2.982325 | 0.760970  | C | -4.369917 | -5.174324 | -2.873310 |
| C | 4.884037  | -2.650156 | -1.681463 | C | -4.379158 | -4.315154 | -4.010602 |
| C | 2.597424  | -2.978201 | -2.097478 | C | -4.025671 | -2.981080 | -3.840906 |
| C | 3.827355  | -2.443312 | -2.653394 | C | -1.543069 | -3.676632 | 3.075072  |
| C | -2.270658 | 2.411646  | 2.886133  | C | -0.815222 | -4.808772 | 2.751429  |
| C | -2.374133 | 3.292900  | 1.762452  | C | -0.983135 | -5.391678 | 1.461900  |
| C | -3.051427 | 2.837049  | 0.571758  | C | -1.819463 | -4.761567 | 0.549966  |
| C | -3.429695 | 3.703818  | -0.519726 | H | -3.277599 | 1.818265  | 5.408904  |
| C | -3.502579 | 3.159816  | -1.838241 | H | -3.476823 | -3.065421 | 4.732530  |
| C | -3.228014 | 1.757958  | -2.038496 | H | -1.638812 | 5.135500  | 0.907761  |
| C | -2.733842 | 1.203988  | -3.273833 | H | -1.194489 | 2.050205  | 4.721891  |
| C | -2.759102 | -0.213264 | -3.462011 | H | -4.092012 | 3.574929  | -3.871190 |
| C | -3.283916 | -1.058499 | -2.420276 | H | -3.770802 | 5.464958  | 0.676815  |
| C | -3.601719 | -2.455991 | -2.602402 | H | -1.937671 | -1.825075 | -4.641413 |
| C | -3.546930 | -3.328403 | -1.473882 | H | -1.949517 | 3.061403  | -4.046753 |
| C | -3.165143 | -2.794054 | -0.186999 | H | -4.011532 | -5.317027 | -0.780167 |
| C | -2.526827 | -3.574864 | 0.845787  | H | -4.099568 | -2.315665 | -4.695948 |
| C | -2.409499 | -3.027772 | 2.162723  | H | -1.336745 | -3.200139 | 4.028028  |
| C | -2.932966 | -1.714540 | 2.437465  | H | -1.849793 | -5.156884 | -0.459287 |

|              |           |           |           |   |           |           |           |
|--------------|-----------|-----------|-----------|---|-----------|-----------|-----------|
| N            | 0.328703  | 4.198920  | 4.922105  | C | 0.870520  | -3.752496 | -0.103552 |
| H            | 0.408857  | 3.425757  | 5.573401  | C | 2.302776  | -4.205483 | -2.525971 |
| H            | 1.255200  | 4.383283  | 4.544881  | C | 1.064808  | -0.044499 | -3.749165 |
| N            | -0.032543 | 6.014046  | 2.770458  | C | -0.104725 | 0.326167  | -1.753961 |
| H            | 0.738039  | 6.103715  | 3.413654  | C | -0.208733 | -1.702428 | 0.240520  |
| H            | 0.185470  | 6.353779  | 1.844723  | C | 2.339694  | -0.068286 | -4.323654 |
| N            | -4.437244 | 7.238889  | -1.142575 | C | 3.014472  | -1.335745 | -4.537448 |
| H            | -4.932472 | 7.743003  | -1.860944 | C | 2.114508  | -4.390901 | -0.071173 |
| H            | -4.758302 | 7.463642  | -0.212003 | C | 3.154403  | -3.581170 | -3.521970 |
| N            | -4.710788 | 6.153145  | -3.755018 | C | 2.843619  | -4.621775 | -1.305536 |
| H            | -4.837500 | 5.617532  | -4.606349 | C | 0.739225  | 0.955123  | -2.749546 |
| H            | -5.577861 | 6.644150  | -3.555405 | C | 0.051398  | 0.656379  | -0.409758 |
| N            | -0.678664 | 2.285971  | -6.195325 | C | -0.000334 | -0.373492 | 0.603123  |
| H            | -0.343495 | 3.153890  | -5.801619 | C | 0.543872  | -2.751642 | 0.895591  |
| H            | 0.000887  | 1.849988  | -6.799011 | C | 1.029780  | 1.639252  | -0.001703 |
| N            | -0.569951 | -0.540405 | -6.497291 | C | 0.948189  | -0.034304 | 1.639554  |
| H            | 0.390535  | -0.207043 | -6.508360 | C | 1.471466  | -2.425695 | 1.891827  |
| H            | -0.547797 | -1.551262 | -6.421307 | C | 1.696148  | 1.897664  | -2.359821 |
| N            | -4.702638 | -4.805876 | -5.281567 | C | 4.256372  | -4.427732 | -1.034594 |
| H            | -5.169075 | -5.698509 | -5.321649 | C | 1.588122  | 1.211095  | 1.266275  |
| H            | -5.107854 | -4.126720 | -5.909714 | C | 1.674188  | -1.041346 | 2.273100  |
| N            | -4.750370 | -6.531182 | -3.020577 | C | 2.761599  | -3.087997 | 1.923640  |
| H            | -4.794221 | -7.002869 | -2.124254 | C | 3.758709  | -2.111907 | 2.328302  |
| H            | -5.650161 | -6.638433 | -3.480642 | C | 6.072444  | -2.851104 | -1.589690 |
| N            | -0.316165 | -6.569504 | 1.111528  | C | 3.084592  | -0.846537 | 2.544967  |
| H            | -0.084183 | -6.650887 | 0.131749  | C | 3.708419  | 0.351866  | 2.183617  |
| H            | 0.439055  | -6.859176 | 1.713049  | C | 5.029866  | 0.326094  | 1.585227  |
| N            | 0.102164  | -5.383571 | 3.663333  | C | 2.944554  | 1.404133  | 1.534772  |
| H            | 1.020530  | -5.517032 | 3.247134  | C | 3.018410  | 1.870578  | -2.954075 |
| H            | 0.216030  | -4.800128 | 4.484833  | C | 6.211036  | -2.512096 | -0.240749 |
| N            | -3.816615 | -2.337710 | 7.263486  | C | 1.841539  | 2.249446  | -0.959652 |
| H            | -4.638021 | -2.058981 | 7.793139  | C | 3.253495  | 2.440294  | -0.686723 |
| H            | -3.941737 | -3.299600 | 6.968514  | C | 5.360121  | -3.136463 | 0.755576  |
| N            | -3.611810 | 0.473439  | 7.640087  | C | 6.125758  | -1.817128 | -2.606950 |
| H            | -3.985677 | 1.411012  | 7.669914  | C | 6.315964  | -0.482518 | -2.237382 |
| H            | -3.989319 | -0.120789 | 8.361273  | C | 5.033377  | -2.136074 | 1.755006  |
|              |           |           |           | C | 5.681157  | -0.894067 | 1.376568  |
|              |           |           |           | C | 3.794847  | 2.026922  | 0.535704  |
|              |           |           |           | C | 5.083066  | 1.360524  | 0.567546  |
| 180          |           |           |           | C | 6.409014  | -1.126372 | 0.142850  |
| OCH3         |           |           |           | C | 3.981722  | 2.206458  | -1.920212 |
| substituted  |           |           |           | C | 5.552646  | 0.566755  | -2.886902 |
| heterodimers |           |           |           | C | 6.459853  | -0.130641 | -0.836812 |
| C            | -0.358951 | -2.052073 | -1.156239 | C | 5.224537  | 1.566855  | -1.887720 |
| C            | 0.309915  | -3.318652 | -1.372452 | C | 5.785537  | 1.136030  | -0.620700 |
| C            | 1.011991  | -3.543127 | -2.560559 |   |           |           |           |
| C            | 0.416573  | -1.288264 | -3.368487 |   |           |           |           |
| C            | -0.309598 | -1.056474 | -2.135589 |   |           |           |           |

|   |           |           |           |   |           |           |           |
|---|-----------|-----------|-----------|---|-----------|-----------|-----------|
| C | 5.077095  | -3.827138 | -1.994275 | C | -4.172555 | 2.856161  | -3.537955 |
| C | 4.515460  | -3.395652 | -3.261063 | C | -3.284242 | -3.799764 | -0.411783 |
| C | 5.163265  | -2.153630 | -3.639885 | C | -3.193851 | -4.431713 | -1.641538 |
| C | 3.077335  | -4.053044 | 0.962053  | C | -3.394441 | -3.667851 | -2.827881 |
| C | 4.400684  | -4.075964 | 0.366114  | C | -3.648500 | -2.317327 | -2.728755 |
| C | 1.065918  | -2.509012 | -3.577483 | C | -3.253016 | -2.413705 | 4.665711  |
| C | 2.390098  | -2.532135 | -4.171572 | C | -4.032962 | -3.544254 | 4.807800  |
| C | 4.426749  | -1.142986 | -4.264629 | C | -4.627424 | -4.134064 | 3.654431  |
| C | 3.335245  | 0.907214  | -3.917822 | C | -4.423288 | -3.545889 | 2.413959  |
| C | 4.625483  | 0.242839  | -3.882236 | C | 0.581425  | 1.392081  | 4.754231  |
| C | -1.193312 | 4.100111  | -0.532897 | C | 1.249789  | 0.436881  | 5.501729  |
| C | -1.818783 | 3.519393  | -1.679519 | C | 0.701413  | -0.876293 | 5.596644  |
| C | -2.771436 | 2.452100  | -1.500103 | C | -0.467065 | -1.173931 | 4.930491  |
| C | -3.676478 | 1.995463  | -2.529779 | H | -1.199478 | 6.246281  | 1.210037  |
| C | -4.181242 | 0.663213  | -2.476870 | H | -0.617810 | 3.596147  | 5.333918  |
| C | -3.759269 | -0.203515 | -1.399352 | H | -1.773908 | 3.377420  | -3.826939 |
| C | -3.732425 | -1.642718 | -1.484140 | H | 0.428780  | 5.411207  | 0.084388  |
| C | -3.558346 | -2.413154 | -0.294725 | H | -5.565055 | -0.735472 | -3.347428 |
| C | -3.464530 | -1.738310 | 0.976705  | H | -3.864627 | 3.895074  | -3.565020 |
| C | -3.613237 | -2.395848 | 2.255782  | H | -3.054562 | -4.353995 | 0.487131  |
| C | -3.002548 | -1.818313 | 3.406853  | H | -3.695233 | -1.760046 | -3.656079 |
| C | -2.235778 | -0.601785 | 3.262836  | H | -2.860212 | -1.962618 | 5.569605  |
| C | -1.161204 | -0.220196 | 4.143602  | H | -4.926125 | -3.942194 | 1.542182  |
| C | -0.623686 | 1.101447  | 4.066583  | H | 1.030905  | 2.364494  | 4.614887  |
| C | -1.201657 | 2.047812  | 3.143290  | H | -0.795304 | -2.205286 | 4.957877  |
| C | -0.966372 | 3.472246  | 3.193862  | O | -4.193736 | -4.091858 | 6.060355  |
| C | -1.132022 | 4.251744  | 2.011769  | O | -5.387760 | -5.249961 | 3.869235  |
| C | -1.499290 | 3.588737  | 0.779937  | O | -2.881701 | -5.749836 | -1.817138 |
| C | -2.111928 | 2.319753  | 0.871813  | O | -3.332403 | -4.249207 | -4.075442 |
| C | -2.756190 | 1.749393  | -0.276967 | O | -6.489070 | 0.760129  | -5.402135 |
| C | -3.251595 | 0.399537  | -0.229344 | O | -5.482771 | 3.327556  | -5.460883 |
| C | -3.115869 | -0.372849 | 0.972951  | O | 0.183298  | 5.150650  | -4.368910 |
| C | -2.483567 | 0.203012  | 2.129956  | O | 1.326834  | 6.276987  | -2.136590 |
| C | -1.971033 | 1.542411  | 2.075211  | O | -0.524790 | 7.648643  | 3.421307  |
| C | -1.005351 | 5.658766  | 2.096529  | O | -0.204249 | 6.093474  | 5.678530  |
| C | -0.687683 | 6.299310  | 3.286421  | O | 2.437903  | 0.641247  | 6.139065  |
| C | -0.531493 | 5.519983  | 4.469842  | O | 1.316453  | -1.856917 | 6.341232  |
| C | -0.683536 | 4.149264  | 4.404017  | C | -5.506872 | -3.910509 | 6.626596  |
| C | -1.357769 | 3.885694  | -2.969347 | H | -5.727531 | -2.838446 | 6.735189  |
| C | -0.326595 | 4.791754  | -3.155103 | H | -6.276153 | -4.387712 | 6.007429  |
| C | 0.296118  | 5.371767  | -2.011833 | H | -5.477741 | -4.383048 | 7.612514  |
| C | -0.136306 | 5.019292  | -0.751866 | C | 2.499183  | -2.409272 | 5.728864  |
| C | -5.141486 | 0.255641  | -3.433515 | H | 2.240639  | -2.898848 | 4.779828  |
| C | -5.583995 | 1.104471  | -4.438777 | H | 3.252667  | -1.633489 | 5.548932  |
| C | -5.090288 | 2.441278  | -4.482072 | H | 2.887433  | -3.149355 | 6.434260  |

|   |           |           |           |
|---|-----------|-----------|-----------|
| C | 3.043173  | 1.932493  | 5.997802  |
| H | 3.970896  | 1.887697  | 6.572491  |
| H | 3.263208  | 2.147259  | 4.942724  |
| H | 2.388645  | 2.718215  | 6.399441  |
| C | -1.260067 | 6.870413  | 6.279535  |
| H | -1.542389 | 7.716941  | 5.642528  |
| H | -2.137861 | 6.234625  | 6.466502  |
| H | -0.860625 | 7.236950  | 7.229445  |
| C | -0.637861 | 8.445345  | 2.236008  |
| H | -1.650673 | 8.382393  | 1.813837  |
| H | -0.427310 | 9.470676  | 2.548373  |
| H | 0.090123  | 8.124980  | 1.478009  |
| C | 2.585017  | 5.686225  | -2.525123 |
| H | 2.932324  | 4.991809  | -1.747909 |
| H | 2.495986  | 5.156264  | -3.480721 |
| H | 3.290980  | 6.515611  | -2.624556 |
| C | -0.376112 | 4.518604  | -5.526637 |
| H | 0.162182  | 4.936674  | -6.380118 |
| H | -0.231344 | 3.429828  | -5.485964 |
| H | -1.449190 | 4.737963  | -5.614016 |
| C | -6.840881 | 3.795687  | -5.335377 |
| H | -7.554280 | 2.965669  | -5.399186 |
| H | -6.970983 | 4.327535  | -4.381428 |
| H | -6.999629 | 4.486890  | -6.168033 |
| C | -6.976370 | -0.586968 | -5.393231 |
| H | -7.531653 | -0.799064 | -4.468661 |
| H | -7.642989 | -0.665429 | -6.255019 |
| H | -6.149030 | -1.303501 | -5.489968 |
| C | -1.991229 | -4.553166 | -4.513352 |
| H | -1.402393 | -3.629580 | -4.601743 |
| H | -1.494755 | -5.240375 | -3.818213 |
| H | -2.092662 | -5.025006 | -5.494908 |
| C | -2.553589 | -6.505542 | -0.647118 |
| H | -2.314203 | -7.510935 | -1.000730 |
| H | -1.687239 | -6.070309 | -0.129634 |
| H | -3.405730 | -6.546149 | 0.046734  |
| C | -5.982891 | -5.867257 | 2.724920  |
| H | -6.511346 | -6.745758 | 3.102272  |
| H | -6.690179 | -5.186730 | 2.230023  |
| H | -5.214019 | -6.174077 | 2.001030  |

|   |           |           |           |
|---|-----------|-----------|-----------|
| C | -3.404137 | 3.672957  | 0.694512  |
| C | -3.066935 | 2.459150  | 1.401255  |
| C | -2.502594 | 2.429053  | 2.729593  |
| C | -2.484615 | 1.193433  | 3.451859  |
| C | -3.025436 | 0.005790  | 2.840290  |
| C | -3.330667 | -1.206530 | 3.562164  |
| C | -3.346573 | -2.452246 | 2.862798  |
| C | -3.035128 | -2.464250 | 1.449681  |
| C | -2.503150 | -3.610784 | 0.753277  |
| C | -2.494537 | -3.613871 | -0.679027 |
| C | -2.485278 | -2.485278 | -1.396944 |
| C | -3.335582 | -2.499685 | -2.811720 |
| C | -3.332013 | -1.265577 | -3.531376 |
| C | -3.038433 | -0.037624 | -2.829038 |
| C | -2.514233 | 1.145941  | -3.461120 |
| C | -2.555343 | 2.396573  | -2.764815 |
| C | -3.103815 | 2.439507  | -1.431141 |
| C | -3.224238 | 1.225183  | -0.723870 |
| C | -3.205973 | 1.235596  | 0.714780  |
| C | -3.177407 | -0.003317 | 1.439298  |
| C | -3.178327 | -1.256804 | 0.733477  |
| C | -3.185208 | -1.267972 | -0.701111 |
| C | -3.198506 | -0.024648 | -1.428619 |
| C | -1.872176 | 3.505982  | -3.320935 |
| C | -1.159554 | 3.410767  | -4.499572 |
| C | -1.110949 | 2.167647  | -5.179054 |
| C | -1.778449 | 1.074155  | -4.671172 |
| C | -3.799520 | 4.852260  | 1.367759  |
| C | -4.195063 | 5.981024  | 0.676939  |
| C | -4.231887 | 5.973365  | -0.739327 |
| C | -3.862268 | 4.824639  | -1.415716 |
| C | -1.740150 | 1.130210  | 4.656106  |
| C | -1.037936 | 2.216550  | 5.132376  |
| C | -1.060329 | 3.444253  | 4.425648  |
| C | -1.783329 | 3.531386  | 3.252140  |
| C | -3.760647 | -3.615222 | 3.551781  |
| C | -4.126186 | -3.583363 | 4.885361  |
| C | -4.101929 | -2.347265 | 5.577299  |
| C | -3.720747 | -1.192601 | 4.922410  |
| C | -1.788242 | -4.648111 | -1.342583 |
| C | -1.126219 | -5.636986 | -0.647381 |
| C | -1.139979 | -5.642690 | 0.769208  |
| C | -1.818370 | -4.644265 | 1.438825  |
| C | -3.723703 | -1.277895 | -4.890970 |
| C | -4.088403 | -2.447487 | -5.528926 |

144

OH substituted\_heterodimers

|   |           |          |           |
|---|-----------|----------|-----------|
| C | -3.433002 | 3.663975 | -0.733730 |
|---|-----------|----------|-----------|

|   |           |           |           |   |           |           |           |
|---|-----------|-----------|-----------|---|-----------|-----------|-----------|
| C | -4.092448 | -3.673327 | -4.819102 | C | 1.702335  | -2.458077 | 2.115952  |
| C | -3.731358 | -3.678781 | -3.483743 | C | 0.030347  | -1.534970 | 0.759709  |
| H | -1.811218 | 4.439265  | -2.775757 | C | -0.145126 | 1.285117  | 0.434321  |
| H | -1.649614 | 0.113956  | -5.161418 | C | 3.056737  | -2.799825 | 2.160159  |
| H | -3.842831 | 4.860286  | 2.453254  | C | 4.003114  | -1.926548 | 2.831184  |
| H | -3.953677 | 4.819602  | -2.495539 | C | 2.666045  | 3.215437  | 1.467483  |
| H | -1.628865 | 0.178254  | 5.166298  | C | 4.337366  | 0.474165  | 3.295875  |
| H | -1.695273 | 4.445884  | 2.678857  | C | 3.706976  | 2.644858  | 2.304490  |
| H | -3.851692 | -4.557591 | 3.024896  | C | 0.947771  | -2.646943 | 0.890523  |
| H | -3.780750 | -0.245083 | 5.451145  | C | -0.223602 | -0.990692 | -0.497539 |
| H | -1.688892 | -4.621976 | -2.422858 | C | -0.308900 | 0.442667  | -0.661981 |
| H | -1.732194 | -4.622250 | 2.517679  | C | 0.613412  | 2.509719  | 0.297005  |
| H | -3.796480 | -0.339174 | -5.433541 | C | 0.407060  | -1.540508 | -1.677509 |
| H | -3.815523 | -4.612150 | -2.939407 | C | 0.262862  | 0.787314  | -1.942536 |
| O | -0.371749 | -6.624954 | -1.245604 | C | 1.179587  | 2.841605  | -0.938502 |
| O | -0.441626 | -6.575918 | 1.485823  | C | 1.568681  | -3.178624 | -0.243614 |
| O | -4.486259 | -4.843431 | -5.412557 | C | 4.940340  | 2.635398  | 1.540756  |
| O | -4.508027 | -2.510287 | -6.843854 | C | 0.713612  | -0.439069 | -2.571391 |
| O | -0.317341 | 2.129791  | -6.308579 | C | 0.997287  | 1.965756  | -2.081563 |
| O | -0.461619 | 4.497491  | -4.950256 | C | 2.527995  | 3.373545  | -0.993814 |
| O | -4.659873 | 7.062190  | -1.449767 | C | 3.178176  | 2.826662  | -2.171649 |
| O | -4.614518 | 7.147553  | 1.284448  | C | 6.483500  | 1.021623  | 0.489193  |
| O | -0.326745 | 4.521623  | 4.843331  | C | 2.231214  | 1.956524  | -2.844715 |
| O | -0.232240 | 2.181652  | 6.253407  | C | 2.672878  | 0.774302  | -3.448823 |
| O | -4.521263 | -2.384152 | 6.893117  | C | 4.078398  | 0.417243  | -3.398465 |
| O | -4.543121 | -4.736144 | 5.494239  | C | 1.897609  | -0.447060 | -3.312938 |
| H | -4.765757 | -4.648598 | -6.317917 | C | 2.975316  | -3.530855 | -0.196840 |
| H | -0.375711 | -6.490860 | -2.201227 | C | 6.215266  | 1.563680  | -0.770942 |
| H | 0.023734  | -7.153230 | 0.864630  | C | 1.292488  | -2.614799 | -1.553596 |
| H | -4.806296 | -4.526625 | 6.401069  | C | 2.527482  | -2.619103 | -2.315916 |
| H | -4.539136 | -1.485417 | 7.243384  | C | 5.288939  | 2.673037  | -0.902011 |
| H | -0.119237 | 1.264674  | 6.532051  | C | 6.577143  | -0.417308 | 0.655175  |
| H | 0.199888  | 4.252815  | 5.609318  | C | 6.399623  | -1.260921 | -0.444945 |
| H | -4.551933 | 7.044906  | 2.241782  | C | 4.532825  | 2.483396  | -2.126639 |
| H | -4.901858 | 7.759944  | -0.825079 | C | 4.991263  | 1.256451  | -2.751653 |
| H | 0.047097  | 4.233475  | -5.729625 | C | 2.824273  | -1.556986 | -3.178054 |
| H | -0.217087 | 1.213302  | -6.593288 | C | 4.172106  | -1.021946 | -3.231373 |
| H | -4.566095 | -1.615169 | -7.199222 | C | 6.031435  | 0.688343  | -1.913844 |
| C | 0.126101  | 0.723931  | 1.740254  | C | 3.567991  | -3.185539 | -1.477200 |
| C | 1.062587  | 1.596613  | 2.414574  | C | 5.624068  | -2.480368 | -0.307890 |
| C | 2.061701  | 1.051244  | 3.226042  | C | 6.122000  | -0.697590 | -1.753583 |
| C | 1.244012  | -1.228642 | 2.741321  | C | 4.867184  | -2.670632 | -1.531487 |
| C | 0.210739  | -0.660392 | 1.900704  | C | 5.174502  | -1.568454 | -2.424189 |
| C | 1.368164  | 2.701074  | 1.522142  | C | 5.834335  | 1.567547  | 1.666996  |
| C | 3.410914  | 1.583996  | 3.166247  | C | 5.526553  | 0.466326  | 2.560131  |

|   |          |           |          |   |           |           |          |
|---|----------|-----------|----------|---|-----------|-----------|----------|
| C | 5.984938 | -0.760140 | 1.935197 | C | 2.951877  | -1.807831 | 1.528731 |
| C | 3.257049 | 3.557411  | 0.185889 | C | 1.799850  | -2.523740 | 1.007362 |
| C | 4.662931 | 3.199072  | 0.231824 | C | 1.154219  | -3.483966 | 1.794979 |
| C | 2.154548 | -0.388015 | 3.392081 | C | 0.936603  | 2.578850  | 5.193851 |
| C | 3.561593 | -0.744602 | 3.433990 | C | -0.513420 | 2.513195  | 5.215735 |
| C | 5.237269 | -1.933902 | 2.067637 | C | -1.158630 | 1.557680  | 6.006367 |
| C | 3.705533 | -3.346284 | 0.982380 | C | -2.310703 | 0.844761  | 5.486349 |
| C | 5.052731 | -2.810003 | 0.924881 | C | -2.640898 | -1.574585 | 5.128908 |

180

SCH3 substituted heterodimers

|   |           |           |          |   |           |           |           |
|---|-----------|-----------|----------|---|-----------|-----------|-----------|
| C | 0.483909  | -3.535272 | 5.308233 | C | 1.687556  | 1.684409  | 5.962099  |
| C | 0.484403  | -3.995827 | 3.987924 | C | 1.017892  | 0.691763  | 6.782064  |
| C | -0.709303 | -3.863178 | 3.173348 | C | -0.378426 | 0.629098  | 6.803599  |
| C | -1.858968 | -3.274482 | 3.709285 | C | -1.047910 | -0.658106 | 6.775437  |
| C | -1.859701 | -2.797499 | 5.078995 | C | 1.636581  | -3.759670 | 3.136622  |
| C | -0.709941 | -2.925808 | 5.864087 | C | 3.415283  | -2.076716 | 2.819226  |
| C | -2.639617 | -2.345376 | 2.912372 | C | 2.745822  | -3.071144 | 3.637997  |
| C | -2.240904 | -2.038285 | 1.609970 | C | 3.829367  | -0.985926 | 3.682455  |
| C | -1.045112 | -2.647493 | 1.057331 | C | -0.296299 | -1.835461 | 6.727983  |
| C | -0.295650 | -3.546741 | 1.819424 | C | 1.635618  | -2.821206 | 5.828049  |
| C | -2.311474 | -0.668936 | 1.134290 | C | 2.744665  | -2.592931 | 5.008484  |
| C | -1.151718 | -0.434196 | 0.301841 | C | 3.414106  | -1.305020 | 5.035508  |
| C | -0.374147 | -1.653664 | 0.250131 | C | 2.950659  | -0.293602 | 5.882049  |
| C | -0.508175 | 0.800852  | 0.333382 | C | 1.798525  | -0.530912 | 6.732424  |
| C | -0.994995 | 1.856457  | 1.193043 | C | 1.153645  | -1.770884 | 6.706259  |
| C | -2.109366 | 1.632989  | 2.004945 | C | 0.815162  | 1.290120  | -2.703517 |
| C | -2.779711 | 0.345599  | 1.976311 | C | -0.539739 | 1.750703  | -2.540996 |
| C | 0.156233  | 2.573827  | 1.707791 | C | -0.782369 | 3.102171  | -2.209931 |
| C | 1.351423  | 1.962951  | 1.153968 | C | 0.265394  | 4.060299  | -2.479293 |
| C | 0.936385  | 0.866328  | 0.306650 | C | 1.609325  | 3.603131  | -2.614668 |
| C | 1.018896  | -1.592016 | 0.220888 | C | 1.883895  | 2.187889  | -2.509035 |
| C | 1.687052  | -0.306984 | 0.251187 | C | -1.625168 | 0.811964  | -2.570966 |
| C | 2.881716  | -0.437236 | 1.056270 | C | -2.927324 | 1.230405  | -2.233689 |
| C | 3.283200  | 0.614290  | 1.884178 | C | -3.070158 | 2.463485  | -1.500635 |
| C | 2.505438  | 1.838673  | 1.933391 | C | -2.008683 | 3.420771  | -1.523822 |
| C | -2.106602 | 2.106630  | 3.375836 | C | -2.135439 | 4.563387  | -0.693963 |
| C | -0.995801 | 2.791997  | 3.877115 | C | -3.218948 | 4.766848  | 0.141530  |
| C | 0.156123  | 3.033228  | 3.027315 | C | -4.243161 | 3.778095  | 0.211269  |
| C | 1.351292  | 2.900963  | 3.841008 | C | -4.150666 | 2.663974  | -0.611011 |
| C | 2.503148  | 2.314699  | 3.304914 | C | 1.078595  | -0.104706 | -2.911850 |
| C | -2.776315 | 1.114300  | 4.195504 | C | -0.010213 | -1.042902 | -2.940785 |
| C | -3.192032 | 0.024781  | 3.330621 | C | -1.360882 | -0.588230 | -2.771780 |
| C | -3.125101 | -1.295546 | 3.789385 | C | -2.412590 | -1.523022 | -2.656667 |

|   |           |           |           |   |           |           |            |
|---|-----------|-----------|-----------|---|-----------|-----------|------------|
| C | -3.766253 | -1.033889 | -2.777146 | H | 3.788728  | 3.384366  | -1.060541  |
| C | -4.028471 | 0.350134  | -2.555714 | H | 0.942480  | -4.794749 | -4.079731  |
| C | 0.267209  | -2.423174 | -2.992336 | H | 4.657075  | -1.560248 | -4.101132  |
| C | -0.723184 | -3.326458 | -2.460007 | H | -3.993815 | -3.405194 | -1.462648  |
| C | -2.074233 | -2.883636 | -2.319593 | H | 0.699374  | -4.829463 | -1.914776  |
| C | -5.341613 | 0.836073  | -2.739397 | H | -5.505819 | 1.897962  | -2.620705  |
| C | -6.397249 | 0.005853  | -3.100444 | H | -4.643183 | -2.886440 | -3.462720  |
| C | -6.127134 | -1.369465 | -3.362847 | H | -1.325315 | 5.279430  | -0.643383  |
| C | -4.837300 | -1.851850 | -3.203998 | H | -4.883999 | 1.875326  | -0.527680  |
| C | 2.410344  | -0.572847 | -2.959736 | C | -7.916283 | 2.371444  | -2.921729  |
| C | 2.640297  | -1.906280 | -3.466103 | C | -7.582028 | -2.013890 | -5.665296  |
| C | 1.564086  | -2.839225 | -3.469998 | C | -3.477458 | -5.632406 | 1.477402   |
| C | -2.981250 | -3.740510 | -1.647356 | C | 1.057190  | -6.837205 | -0.520764  |
| C | -2.605176 | -4.961487 | -1.114182 | C | 1.669450  | -6.938193 | -5.076924  |
| C | -1.246909 | -5.381622 | -1.220702 | C | 6.769648  | -2.700282 | -4.765759  |
| C | -0.346851 | -4.563381 | -1.887709 | C | 6.583320  | -0.757962 | 1.153684   |
| C | 3.163935  | 1.640356  | -2.132850 | C | 5.387521  | 4.227429  | 0.628493   |
| C | 3.441601  | 0.264413  | -2.397858 | C | 5.131689  | 6.062513  | -3.5654050 |
| C | 1.785184  | -4.120076 | -4.023154 | C | 0.658293  | 8.172609  | -5.102328  |
| C | 3.017148  | -4.517582 | -4.523136 | C | -2.613158 | 5.649097  | 2.727629   |
| C | 4.096903  | -3.577815 | -4.526535 | C | -6.369616 | 2.363719  | 1.385734   |
| C | 3.874852  | -2.302474 | -4.026299 | H | 7.466362  | -1.226951 | 1.598810   |
| C | 4.652678  | -0.268975 | -1.891696 | H | 6.319502  | 0.141652  | 1.713971   |
| C | 5.549611  | 0.475432  | -1.146970 | H | 5.750038  | -1.464565 | 1.146236   |
| C | 5.244253  | 1.832386  | -0.838300 | H | 5.987946  | 4.771510  | 1.362953   |
| C | 4.071274  | 2.379738  | -1.338854 | H | 5.241249  | 4.855059  | -0.256216  |
| C | 0.004819  | 5.429661  | -2.714402 | H | 4.420346  | 3.960890  | 1.065613   |
| C | 1.007008  | 6.340429  | -3.011120 | H | 0.423505  | 9.211516  | -5.354744  |
| C | 2.357113  | 5.890474  | -3.100407 | H | 1.667129  | 7.929099  | -5.445830  |
| C | 2.620710  | 4.535164  | -2.935434 | H | -0.079029 | 7.505122  | -5.557093  |
| S | -3.281489 | 6.267536  | 1.126039  | H | 5.945350  | 6.763681  | -3.759996  |
| S | -5.547946 | 4.001902  | 1.399475  | H | 5.329386  | 5.542319  | -2.611553  |
| S | 7.055482  | -0.317491 | -0.573666 | H | 5.055474  | 5.339087  | -4.371795  |
| S | 6.352128  | 2.721105  | 0.233785  | H | -2.649907 | 6.495405  | 3.420970   |
| S | 3.311676  | -6.142715 | -5.190988 | H | -3.231824 | 4.832191  | 3.106127   |
| S | 5.659128  | -4.083610 | -5.214957 | H | -1.579280 | 5.318229  | 2.599322   |
| S | -3.849271 | -5.966736 | -0.297879 | H | -7.126457 | 2.413533  | 2.173636   |
| S | -0.771388 | -6.905673 | -0.434559 | H | -6.858524 | 2.164560  | 0.426921   |
| S | -8.073268 | 0.580447  | -3.270171 | H | -5.650742 | 1.570404  | 1.613505   |
| S | -7.411623 | -2.504390 | -3.894806 | H | -8.929555 | 2.772732  | -3.012961  |
| S | 3.623248  | 7.094597  | -3.438086 | H | -7.545738 | 2.546029  | -1.906755  |
| S | 0.559274  | 8.059753  | -3.263184 | H | -7.261514 | 2.861581  | -3.648929  |
| H | 3.622167  | 4.157260  | -3.085672 | H | -8.378359 | -2.641036 | -6.078463  |
| H | -1.019986 | 5.782595  | -2.710118 | H | -7.864815 | -0.960829 | -5.742776  |
| H | 4.856842  | -1.325397 | -2.006088 | H | -6.645665 | -2.204976 | -6.197065  |



|   |           |           |           |   |           |           |           |
|---|-----------|-----------|-----------|---|-----------|-----------|-----------|
| H | 7.768623  | -3.023810 | -5.071319 | C | 0.905168  | 0.719302  | 0.010401  |
| H | 6.502728  | -1.786536 | -5.305475 | C | 1.686712  | -0.417441 | 0.208536  |
| H | 6.752232  | -2.524535 | -3.686030 | C | 1.560954  | -3.272983 | 3.682327  |
| H | 1.810040  | -7.945527 | -5.478477 | C | 2.839660  | -0.355447 | 1.081837  |
| H | 1.332197  | -7.002492 | -4.037967 | C | 2.917831  | -1.611972 | 1.803881  |
| H | 0.931462  | -6.401278 | -5.680473 | C | 2.624177  | -2.466532 | 4.099567  |
| H | -4.135798 | -6.292394 | 2.050990  | C | 3.315657  | -1.620518 | 3.143516  |
| H | -2.434686 | -5.870623 | 1.698871  | C | -2.880831 | 0.390257  | 1.562652  |
| H | -3.694217 | -4.590058 | 1.721304  | C | -3.360037 | 0.313116  | 2.929678  |
| H | 1.405454  | -7.716896 | 0.027772  | C | -3.286601 | -0.896439 | 3.628544  |
| H | 1.413211  | -6.890334 | -1.554363 | C | 3.170813  | 0.844696  | 1.717159  |
| H | 1.433201  | -5.928920 | -0.039473 | C | 3.583328  | 0.834113  | 3.107949  |
|   |           |           |           | C | 3.655074  | -0.375206 | 3.807707  |
|   |           |           |           | C | 1.246809  | 1.968282  | 0.656433  |
|   |           |           |           | C | 2.358883  | 2.029271  | 1.500618  |
|   |           |           |           | C | -2.244506 | 1.682441  | 1.384488  |
|   |           |           |           | C | -1.092943 | 1.788363  | 0.603542  |
|   |           |           |           | C | 0.009345  | 2.629261  | 1.028483  |
|   |           |           |           | C | 2.269943  | 2.750611  | 2.756424  |
|   |           |           |           | C | 1.076757  | 3.387349  | 3.116180  |
|   |           |           |           | C | -0.075156 | 3.329339  | 2.234239  |
|   |           |           |           | C | -2.331368 | 2.406177  | 2.638825  |
|   |           |           |           | C | -1.267232 | 3.212512  | 3.055971  |
|   |           |           |           | C | -3.019926 | 1.558445  | 3.595024  |
|   |           |           |           | C | 3.027073  | 2.011831  | 3.750348  |
|   |           |           |           | C | -2.619115 | 1.548366  | 4.934354  |
|   |           |           |           | C | -1.514842 | 2.384642  | 5.367455  |
|   |           |           |           | C | -0.851001 | 3.200263  | 4.445788  |
|   |           |           |           | C | 0.596373  | 3.308001  | 4.483308  |
|   |           |           |           | C | 1.325799  | 2.596705  | 5.440393  |
|   |           |           |           | C | 2.563858  | 1.937220  | 5.067493  |
|   |           |           |           | C | 0.971944  | 0.951649  | -2.994520 |
|   |           |           |           | C | 2.046766  | 1.855387  | -2.873386 |
|   |           |           |           | C | 3.306039  | 1.348292  | -2.386568 |
|   |           |           |           | C | 3.561118  | -0.058647 | -2.431051 |
|   |           |           |           | C | 2.541961  | -0.946401 | -2.931971 |
|   |           |           |           | C | 1.220418  | -0.461436 | -3.013047 |
|   |           |           |           | C | 0.119381  | -1.386301 | -2.972615 |
|   |           |           |           | C | 0.372211  | -2.767109 | -2.853980 |
|   |           |           |           | C | 1.681287  | -3.250024 | -3.228300 |
|   |           |           |           | C | 2.774769  | -2.332792 | -3.264080 |
|   |           |           |           | C | -1.230457 | -0.897447 | -2.925895 |
|   |           |           |           | C | -2.298281 | -1.797477 | -2.740560 |
|   |           |           |           | C | -1.996485 | -3.102334 | -2.206276 |
|   |           |           |           | C | -0.653647 | -3.591319 | -2.263419 |

144

SH substituted heterodimers

|   |           |           |           |  |  |  |  |
|---|-----------|-----------|-----------|--|--|--|--|
| C | 3.172809  | -0.451604 | 5.174392  |  |  |  |  |
| C | 2.639245  | 0.682695  | 5.793413  |  |  |  |  |
| C | 1.448330  | 0.567645  | 6.615382  |  |  |  |  |
| C | 0.836116  | -0.676626 | 6.789389  |  |  |  |  |
| C | 1.390741  | -1.854055 | 6.147283  |  |  |  |  |
| C | 2.537031  | -1.743792 | 5.355154  |  |  |  |  |
| C | 0.636749  | 1.751059  | 6.397509  |  |  |  |  |
| C | -0.756922 | 1.646873  | 6.361441  |  |  |  |  |
| C | -1.391906 | 0.354391  | 6.541460  |  |  |  |  |
| C | -0.610748 | -0.785319 | 6.751843  |  |  |  |  |
| C | -2.542509 | 0.292999  | 5.659260  |  |  |  |  |
| C | -2.869678 | -0.905656 | 5.018933  |  |  |  |  |
| C | -2.057876 | -2.089341 | 5.236674  |  |  |  |  |
| C | -0.949828 | -2.030183 | 6.087326  |  |  |  |  |
| C | 0.287114  | -2.690300 | 5.713847  |  |  |  |  |
| C | 0.370438  | -3.387238 | 4.504779  |  |  |  |  |
| C | -0.780512 | -3.449608 | 3.622655  |  |  |  |  |
| C | -1.972309 | -2.812388 | 3.981842  |  |  |  |  |
| C | -2.732547 | -2.075633 | 2.987525  |  |  |  |  |
| C | -2.270978 | -2.003020 | 1.670927  |  |  |  |  |
| C | -1.030523 | -2.661094 | 1.300723  |  |  |  |  |
| C | -0.300851 | -3.374770 | 2.254686  |  |  |  |  |
| C | 1.146177  | -3.266744 | 2.291113  |  |  |  |  |
| C | 1.811813  | -2.449487 | 1.370777  |  |  |  |  |
| C | 1.052627  | -1.708627 | 0.384027  |  |  |  |  |
| C | -0.339591 | -1.811991 | 0.354349  |  |  |  |  |
| C | -2.345695 | -0.746693 | 0.947323  |  |  |  |  |
| C | -1.148220 | -0.630789 | 0.142828  |  |  |  |  |
| C | -0.535860 | 0.609679  | -0.018524 |  |  |  |  |

|   |           |           |           |   |           |           |           |
|---|-----------|-----------|-----------|---|-----------|-----------|-----------|
| C | -1.480743 | 0.519206  | -2.916244 | S | 3.950525  | 6.475934  | -4.367409 |
| C | -2.793472 | 0.990931  | -2.715271 | H | -4.885720 | 1.899799  | -1.258031 |
| C | -3.886935 | 0.085018  | -2.982375 | H | -1.110924 | 5.066455  | -1.343881 |
| C | -3.638372 | -1.320480 | -2.996395 | H | -4.489043 | -3.253743 | -3.398768 |
| C | -4.693104 | -2.190577 | -3.338952 | H | -5.347029 | 1.608110  | -3.417943 |
| C | -5.971090 | -1.728973 | -3.633328 | H | 0.697969  | -5.096171 | -1.526305 |
| C | -6.212647 | -0.328148 | -3.643508 | H | -3.916784 | -3.389347 | -1.265738 |
| C | -5.173973 | 0.540980  | -3.334611 | H | 4.831656  | -2.087463 | -3.859364 |
| C | -0.334351 | -4.769193 | -1.552283 | H | 1.054442  | -5.258179 | -3.673749 |
| C | -1.271517 | -5.465956 | -0.803442 | H | 3.985694  | 3.229009  | -1.589218 |
| C | -2.600254 | -4.966892 | -0.725982 | H | 4.860024  | -1.618431 | -1.697092 |
| C | -2.931291 | -3.812377 | -1.419225 | H | -0.824919 | 5.424419  | -3.477740 |
| C | 4.021338  | -2.796742 | -3.734775 | H | 3.809443  | 3.746314  | -3.721852 |
| C | 4.231245  | -4.117080 | -4.111349 | H | 3.338753  | 7.174586  | -5.350152 |
| C | 3.147030  | -5.034686 | -4.055209 | H | 5.695220  | 3.849764  | -0.277396 |
| C | 1.899361  | -4.579248 | -3.645714 | H | 6.971406  | 0.227175  | 0.828247  |
| C | 4.217175  | 2.176332  | -1.694257 | H | 5.538872  | -5.372032 | -5.650840 |
| C | 5.354242  | 1.679780  | -1.073770 | H | 2.103176  | -7.082246 | -4.487853 |
| C | 5.602873  | 0.280669  | -1.108876 | H | 0.501253  | -6.817853 | -0.101299 |
| C | 4.713237  | -0.548227 | -1.773775 | H | -3.131142 | -6.026528 | 1.329024  |
| C | -0.381884 | 1.442400  | -2.941062 | H | -6.531981 | -3.961354 | -4.048402 |
| C | -0.615216 | 2.820065  | -2.758970 | H | -8.145425 | -0.431060 | -5.021894 |
| C | 0.450918  | 3.736703  | -3.095490 | H | -5.088862 | 4.548127  | 1.423868  |
| C | 1.792332  | 3.250892  | -3.149704 | H | -1.901034 | 6.566760  | 0.131623  |
| C | 0.201514  | 5.075441  | -3.460432 | H | -0.464478 | 7.520777  | -4.240774 |
| C | 1.218310  | 5.946984  | -3.832899 |   |           |           |           |
| C | 2.551282  | 5.459019  | -3.906033 |   |           |           |           |
| C | 2.805410  | 4.131649  | -3.582980 |   |           |           |           |
| C | -2.961584 | 2.304250  | -2.146658 |   |           |           |           |
| C | -1.863181 | 3.220568  | -2.157796 |   |           |           |           |
| C | -4.096805 | 2.633205  | -1.370731 |   |           |           |           |
| C | -4.187476 | 3.807918  | -0.640887 |   |           |           |           |
| C | -3.101856 | 4.726270  | -0.665186 |   |           |           |           |
| C | -1.971579 | 4.411710  | -1.404878 |   |           |           |           |
| S | -5.684061 | 4.082820  | 0.302186  |   |           |           |           |
| S | -3.194312 | 6.223172  | 0.303853  |   |           |           |           |
| S | -7.301215 | -2.853227 | -4.026439 |   |           |           |           |
| S | -7.811377 | 0.392847  | -4.003189 |   |           |           |           |
| S | -0.825436 | -6.928930 | 0.117178  |   |           |           |           |
| S | -3.887309 | -5.746273 | 0.243492  |   |           |           |           |
| S | 5.886957  | -4.577860 | -4.613441 |   |           |           |           |
| S | 3.405767  | -6.734608 | -4.539169 |   |           |           |           |
| S | 6.467542  | 2.748220  | -0.177408 |   |           |           |           |
| S | 7.015588  | -0.485304 | -0.320330 |   |           |           |           |
| S | 0.878201  | 7.651580  | -4.246881 |   |           |           |           |

  

**Optimized structure for monomers, homodimers, and heterodimers for c-HBC with different bowl depth, as shown in Figure 6.**

72  
cf0, c-HBC\_monomer with bowl depth: 0.00

|   |          |           |           |
|---|----------|-----------|-----------|
| C | 0.000000 | 1.286711  | 3.663591  |
| C | 0.000000 | 2.529267  | 2.946321  |
| C | 0.000000 | 2.545652  | 1.469931  |
| C | 0.000000 | 3.815788  | 0.717379  |
| C | 0.000000 | 3.815788  | -0.717379 |
| C | 0.000000 | 2.545652  | -1.469931 |
| C | 0.000000 | 2.529267  | -2.946321 |
| C | 0.000000 | 1.286711  | -3.663591 |
| C | 0.000000 | 0.000000  | -2.939776 |
| C | 0.000000 | -1.286711 | -3.663591 |
| C | 0.000000 | -2.529267 | -2.946321 |
| C | 0.000000 | -2.545652 | -1.469931 |

|                                          |           |           |           |   |          |           |           |
|------------------------------------------|-----------|-----------|-----------|---|----------|-----------|-----------|
| C                                        | 0.000000  | -3.815788 | -0.717379 | H | 0.000000 | 7.251868  | -1.291014 |
| C                                        | 0.000000  | -3.815788 | 0.717379  | H | 0.000000 | 7.251868  | 1.291014  |
| C                                        | 0.000000  | -2.545652 | 1.469931  | H | 0.000000 | 5.276702  | 2.344489  |
| C                                        | 0.000000  | -2.529267 | 2.946321  | H | 0.000000 | 0.608006  | -5.742349 |
| C                                        | 0.000000  | -1.286711 | 3.663591  | H | 0.000000 | 2.507847  | -6.926079 |
| C                                        | 0.000000  | 0.000000  | 2.939776  | H | 0.000000 | 4.743987  | -5.635229 |
| C                                        | 0.000000  | 0.000000  | 1.491907  | H | 0.000000 | 4.668578  | -3.397371 |
| C                                        | 0.000000  | 1.291875  | 0.745960  | H | 0.000000 | -4.668578 | -3.397371 |
| C                                        | 0.000000  | 1.291875  | -0.745960 | H | 0.000000 | -4.743987 | -5.635229 |
| C                                        | 0.000000  | 0.000000  | -1.491907 | H | 0.000000 | -2.507847 | -6.926079 |
| C                                        | 0.000000  | -1.291875 | -0.745960 | H | 0.000000 | -0.608006 | -5.742349 |
| C                                        | 0.000000  | -1.291875 | 0.745960  | H | 0.000000 | -5.276702 | 2.344489  |
| C                                        | 0.000000  | -1.428620 | 5.090061  | H | 0.000000 | -7.251868 | 1.291014  |
| C                                        | 0.000000  | -2.576524 | 5.841540  | H | 0.000000 | -7.251868 | -1.291014 |
| C                                        | 0.000000  | -3.770468 | 5.152301  | H | 0.000000 | -5.276702 | -2.344489 |
| C                                        | 0.000000  | -3.693653 | 3.782439  |   |          |           |           |
| C                                        | 0.000000  | 3.693653  | 3.782439  |   |          |           |           |
| C                                        | 0.000000  | 3.770468  | 5.152301  |   |          |           |           |
| C                                        | 0.000000  | 2.576524  | 5.841540  |   |          |           |           |
| C                                        | 0.000000  | 1.428620  | 5.090061  |   |          |           |           |
| C                                        | 0.000000  | 5.122138  | -1.307584 |   |          |           |           |
| C                                        | 0.000000  | 6.346950  | -0.689314 |   |          |           |           |
| C                                        | 0.000000  | 6.346950  | 0.689314  |   |          |           |           |
| C                                        | 0.000000  | 5.122138  | 1.307584  |   |          |           |           |
| C                                        | 0.000000  | 1.428620  | -5.090061 |   |          |           |           |
| C                                        | 0.000000  | 2.576524  | -5.841540 |   |          |           |           |
| C                                        | 0.000000  | 3.770468  | -5.152301 |   |          |           |           |
| C                                        | 0.000000  | 3.693653  | -3.782439 |   |          |           |           |
| C                                        | 0.000000  | -3.693653 | -3.782439 |   |          |           |           |
| C                                        | 0.000000  | -3.770468 | -5.152301 |   |          |           |           |
| C                                        | 0.000000  | -2.576524 | -5.841540 |   |          |           |           |
| C                                        | 0.000000  | -1.428620 | -5.090061 |   |          |           |           |
| C                                        | 0.000000  | -5.122138 | 1.307584  |   |          |           |           |
| C                                        | 0.000000  | -6.346950 | 0.689314  |   |          |           |           |
| C                                        | 0.000000  | -6.346950 | -0.689314 |   |          |           |           |
| C                                        | 0.000000  | -5.122138 | -1.307584 |   |          |           |           |
| H                                        | 0.000000  | -0.608006 | 5.742349  |   |          |           |           |
| H                                        | 0.000000  | -2.507847 | 6.926079  |   |          |           |           |
| H                                        | 0.000000  | -4.743987 | 5.635229  |   |          |           |           |
| H                                        | 0.000000  | -4.668578 | 3.397371  |   |          |           |           |
| H                                        | 0.000000  | 4.668578  | 3.397371  |   |          |           |           |
| H                                        | 0.000000  | 4.743987  | 5.635229  |   |          |           |           |
| H                                        | 0.000000  | 2.507847  | 6.926079  |   |          |           |           |
| H                                        | 0.000000  | 0.608006  | 5.742349  |   |          |           |           |
| H                                        | 0.000000  | 5.276702  | -2.344489 |   |          |           |           |
| 72                                       |           |           |           |   |          |           |           |
| cfl, c-HBC_monomer with bowl depth: 0.10 |           |           |           |   |          |           |           |
| C                                        | 0.044317  | 3.812762  | 0.717191  |   |          |           |           |
| C                                        | 0.044317  | 3.812762  | -0.717191 |   |          |           |           |
| C                                        | 0.000000  | 2.543960  | -1.469049 |   |          |           |           |
| C                                        | -0.044317 | 2.527769  | -2.944025 |   |          |           |           |
| C                                        | -0.044317 | 1.285508  | -3.661130 |   |          |           |           |
| C                                        | 0.000000  | 0.000000  | -2.937894 |   |          |           |           |
| C                                        | 0.044317  | -1.285508 | -3.661130 |   |          |           |           |
| C                                        | 0.044317  | -2.527769 | -2.944025 |   |          |           |           |
| C                                        | 0.000000  | -2.543960 | -1.469049 |   |          |           |           |
| C                                        | -0.044317 | -2.527769 | -2.944025 |   |          |           |           |
| C                                        | -0.044317 | -3.812762 | -0.717191 |   |          |           |           |
| C                                        | -0.044317 | -3.812762 | 0.717191  |   |          |           |           |
| C                                        | 0.000000  | -2.543960 | 1.469049  |   |          |           |           |
| C                                        | 0.044317  | -2.527769 | 2.944025  |   |          |           |           |
| C                                        | 0.044317  | -1.285508 | 3.661130  |   |          |           |           |
| C                                        | 0.000000  | 0.000000  | 2.937894  |   |          |           |           |
| C                                        | -0.044317 | 1.285508  | 3.661130  |   |          |           |           |
| C                                        | -0.044317 | 2.527769  | 2.944025  |   |          |           |           |
| C                                        | 0.000000  | 2.543960  | 1.469049  |   |          |           |           |
| C                                        | 0.000000  | 1.290885  | 0.745455  |   |          |           |           |
| C                                        | 0.000000  | 1.290885  | -0.745455 |   |          |           |           |
| C                                        | 0.000000  | 0.000000  | -1.491036 |   |          |           |           |
| C                                        | 0.000000  | -1.290885 | -0.745455 |   |          |           |           |
| C                                        | 0.000000  | -1.290885 | 0.745455  |   |          |           |           |
| C                                        | 0.000000  | 0.000000  | 1.491036  |   |          |           |           |
| C                                        | -0.097238 | 3.692412  | 3.777614  |   |          |           |           |

|   |           |           |           |                                          |           |           |           |
|---|-----------|-----------|-----------|------------------------------------------|-----------|-----------|-----------|
| C | -0.142885 | 3.767538  | 5.146909  | H                                        | 0.181387  | -4.740352 | 5.629678  |
| C | -0.142885 | 2.573063  | 5.836438  | H                                        | 0.105484  | -4.666300 | 3.388263  |
| C | -0.097238 | 1.425002  | 5.086435  |                                          |           |           |           |
| C | 0.097238  | 5.116866  | -1.308871 |                                          |           |           |           |
| C | 0.142885  | 6.340437  | -0.689624 | 72                                       |           |           |           |
| C | 0.142885  | 6.340437  | 0.689624  | cf2, c-HBC_monomer with bowl depth: 0.19 |           |           |           |
| C | 0.097238  | 5.116866  | 1.308871  | C                                        | 0.088046  | 3.804764  | 0.716832  |
| C | -0.097238 | 1.425002  | -5.086435 | C                                        | 0.088046  | 3.804764  | -0.716832 |
| C | -0.142885 | 2.573063  | -5.836438 | C                                        | 0.000000  | 2.539183  | -1.466095 |
| C | -0.142885 | 3.767538  | -5.146909 | C                                        | -0.088046 | 2.523187  | -2.936748 |
| C | -0.097238 | 3.692412  | -3.777614 | C                                        | -0.088046 | 1.281740  | -3.653706 |
| C | 0.097238  | -3.692412 | -3.777614 | C                                        | 0.000000  | 0.000000  | -2.932316 |
| C | 0.142885  | -3.767538 | -5.146909 | C                                        | 0.088046  | -1.281740 | -3.653706 |
| C | 0.142885  | -2.573063 | -5.836438 | C                                        | 0.088046  | -2.523187 | -2.936748 |
| C | 0.097238  | -1.425002 | -5.086435 | C                                        | 0.000000  | -2.539183 | -1.466095 |
| C | -0.097238 | -5.116866 | 1.308871  | C                                        | -0.088046 | -3.804764 | -0.716832 |
| C | -0.142885 | -6.340437 | 0.689624  | C                                        | -0.088046 | -3.804764 | -2.936748 |
| C | -0.142885 | -6.340437 | -0.689624 | C                                        | 0.000000  | -2.539183 | 1.466095  |
| C | -0.097238 | -5.116866 | -1.308871 | C                                        | 0.088046  | -2.523187 | 2.936748  |
| C | 0.097238  | -1.425002 | 5.086435  | C                                        | 0.088046  | -1.281740 | 3.653706  |
| C | 0.142885  | -2.573063 | 5.836438  | C                                        | 0.000000  | 0.000000  | 2.932316  |
| C | 0.142885  | -3.767538 | 5.146909  | C                                        | -0.088046 | 1.281740  | 3.653706  |
| C | 0.097238  | -3.692412 | 3.777614  | C                                        | -0.088046 | 2.523187  | 2.936748  |
| H | -0.105484 | 4.666300  | 3.388263  | C                                        | 0.000000  | 2.539183  | 1.466095  |
| H | -0.181387 | 4.740352  | 5.629678  | C                                        | 0.000000  | 1.287984  | 0.743711  |
| H | -0.181387 | 2.504433  | 6.920279  | C                                        | 0.000000  | 1.287984  | -0.743711 |
| H | -0.105484 | 0.600947  | 5.735235  | C                                        | 0.000000  | 0.000000  | -1.487627 |
| H | 0.105484  | 5.266523  | -2.346995 | C                                        | 0.000000  | 0.000000  | -1.487627 |
| H | 0.181387  | 7.244810  | -1.290914 | C                                        | 0.000000  | -1.287984 | -0.743711 |
| H | 0.181387  | 7.244810  | 1.290914  | C                                        | 0.000000  | -1.287984 | 0.743711  |
| H | 0.105484  | 5.266523  | 2.346995  | C                                        | 0.000000  | 0.000000  | 1.487627  |
| H | -0.105484 | 0.600947  | -5.735235 | C                                        | -0.194476 | 3.688687  | 3.761851  |
| H | -0.181387 | 2.504433  | -6.920279 | C                                        | -0.285142 | 3.759350  | 5.129406  |
| H | -0.181387 | 4.740352  | -5.629678 | C                                        | -0.285142 | 2.563659  | 5.820088  |
| H | -0.105484 | 4.666300  | -3.388263 | C                                        | -0.194476 | 1.414202  | 5.075651  |
| H | 0.105484  | -4.666300 | -3.388263 | C                                        | 0.194476  | 5.102401  | -1.313098 |
| H | 0.181387  | -4.740352 | -5.629678 | C                                        | 0.285142  | 6.322043  | -0.690405 |
| H | 0.181387  | -2.504433 | -6.920279 | C                                        | 0.285142  | 6.322043  | 0.690405  |
| H | 0.105484  | -0.600947 | -5.735235 | C                                        | 0.194476  | 5.102401  | 1.313098  |
| H | -0.105484 | -5.266523 | 2.346995  | C                                        | -0.194476 | 1.414202  | -5.075651 |
| H | -0.181387 | -7.244810 | 1.290914  | C                                        | -0.285142 | 2.563659  | -5.820088 |
| H | -0.181387 | -7.244810 | -1.290914 | C                                        | -0.285142 | 3.759350  | -5.129406 |
| H | -0.105484 | -5.266523 | -2.346995 | C                                        | -0.194476 | 3.688687  | -3.761851 |
| H | 0.105484  | -0.600947 | 5.735235  | C                                        | 0.194476  | -3.688687 | -3.761851 |
| H | 0.181387  | -2.504433 | 6.920279  | C                                        | 0.285142  | -3.759350 | -5.129406 |

|   |           |           |           |   |           |           |           |
|---|-----------|-----------|-----------|---|-----------|-----------|-----------|
| C | 0.285142  | -2.563659 | -5.820088 | C | 0.131423  | -1.275907 | -3.642678 |
| C | 0.194476  | -1.414202 | -5.075651 | C | 0.131423  | -2.516662 | -2.926378 |
| C | -0.194476 | -5.102401 | 1.313098  | C | 0.000000  | -2.531851 | -1.462011 |
| C | -0.285142 | -6.322043 | 0.690405  | C | -0.131423 | -3.792003 | -0.716393 |
| C | -0.285142 | -6.322043 | -0.690405 | C | -0.131423 | -3.792003 | 0.716393  |
| C | -0.194476 | -5.102401 | -1.313098 | C | 0.000000  | -2.531851 | 1.462011  |
| C | 0.194476  | -1.414202 | 5.075651  | C | 0.131423  | -2.516662 | 2.926378  |
| C | 0.285142  | -2.563659 | 5.820088  | C | 0.131423  | -1.275907 | 3.642678  |
| C | 0.285142  | -3.759350 | 5.129406  | C | 0.000000  | 0.000000  | 2.923844  |
| C | 0.194476  | -3.688687 | 3.761851  | C | -0.131423 | 1.275907  | 3.642678  |
| H | -0.210967 | 4.659095  | 3.359605  | C | -0.131423 | 2.516662  | 2.926378  |
| H | -0.363000 | 4.729704  | 5.612263  | C | 0.000000  | 2.531851  | 1.462011  |
| H | -0.363000 | 2.497286  | 6.901899  | C | 0.000000  | 1.283720  | 0.741290  |
| H | -0.210967 | 0.581194  | 5.715738  | C | 0.000000  | 1.283720  | -0.741290 |
| H | 0.210967  | 5.240562  | -2.354562 | C | 0.000000  | 0.000000  | -1.482703 |
| H | 0.363000  | 7.225508  | -1.289164 | C | 0.000000  | -1.283720 | -0.741290 |
| H | 0.363000  | 7.225508  | 1.289164  | C | 0.000000  | -1.283720 | 0.741290  |
| H | 0.210967  | 5.240562  | 2.354562  | C | 0.000000  | 0.000000  | 1.482703  |
| H | -0.210967 | 0.581194  | -5.715738 | C | -0.291714 | 3.683373  | 3.738481  |
| H | -0.363000 | 2.497286  | -6.901899 | C | -0.429388 | 3.744854  | 5.103316  |
| H | -0.363000 | 4.729704  | -5.612263 | C | -0.429388 | 2.546770  | 5.795005  |
| H | -0.210967 | 4.659095  | -3.359605 | C | -0.291714 | 1.395847  | 5.058937  |
| H | 0.210967  | -4.659095 | -3.359605 | C | 0.291714  | 5.078515  | -1.320689 |
| H | 0.363000  | -4.729704 | -5.612263 | C | 0.429388  | 6.291295  | -0.691735 |
| H | 0.363000  | -2.497286 | -6.901899 | C | 0.429388  | 6.291295  | 0.691735  |
| H | 0.210967  | -0.581194 | -5.715738 | C | 0.291714  | 5.078515  | 1.320689  |
| H | -0.210967 | -5.240562 | 2.354562  | C | -0.291714 | 1.395847  | -5.058937 |
| H | -0.363000 | -7.225508 | 1.289164  | C | -0.429388 | 2.546770  | -5.795005 |
| H | -0.363000 | -7.225508 | -1.289164 | C | -0.429388 | 3.744854  | -5.103316 |
| H | -0.210967 | -5.240562 | -2.354562 | C | -0.291714 | 3.683373  | -3.738481 |
| H | 0.210967  | -0.581194 | 5.715738  | C | 0.291714  | -3.683373 | -3.738481 |
| H | 0.363000  | -2.497286 | 6.901899  | C | 0.429388  | -3.744854 | -5.103316 |
| H | 0.363000  | -4.729704 | 5.612263  | C | 0.429388  | -2.546770 | -5.795005 |
| H | 0.210967  | -4.659095 | 3.359605  | C | 0.291714  | -1.395847 | -5.058937 |

72

cf3, c-HBC\_monomer with bowl depth: 0.29

|   |           |          |           |   |           |           |          |
|---|-----------|----------|-----------|---|-----------|-----------|----------|
| C | 0.131423  | 3.792003 | 0.716393  | C | 0.429388  | -2.546770 | 5.795005 |
| C | 0.131423  | 3.792003 | -0.716393 | C | 0.429388  | -3.744854 | 5.103316 |
| C | 0.000000  | 2.531851 | -1.462011 | C | 0.291714  | -3.683373 | 3.738481 |
| C | -0.131423 | 2.516662 | -2.926378 | H | -0.316451 | 4.648962  | 3.317113 |
| C | -0.131423 | 1.275907 | -3.642678 | H | -0.548619 | 4.709998  | 5.588080 |
| C | 0.000000  | 0.000000 | -2.923844 | H | -0.548619 | 2.483352  | 6.873207 |

|   |           |           |           |   |           |           |           |
|---|-----------|-----------|-----------|---|-----------|-----------|-----------|
| H | -0.316451 | 0.548514  | 5.684672  | C | 0.000000  | 1.277889  | -0.737918 |
| H | 0.316451  | 5.196754  | -2.367565 | C | 0.000000  | 0.000000  | -1.476059 |
| H | 0.548619  | 7.193567  | -1.285493 | C | 0.000000  | -1.277889 | -0.737918 |
| H | 0.548619  | 7.193567  | 1.285493  | C | 0.000000  | -1.277889 | 0.737918  |
| H | 0.316451  | 5.196754  | 2.367565  | C | 0.000000  | 0.000000  | 1.476059  |
| H | -0.316451 | 0.548514  | -5.684672 | C | -0.388952 | 3.675877  | 3.704804  |
| H | -0.548619 | 2.483352  | -6.873207 | C | -0.574674 | 3.725561  | 5.065499  |
| H | -0.548619 | 4.709998  | -5.588080 | C | -0.574674 | 2.524451  | 5.759085  |
| H | -0.316451 | 4.648962  | -3.317113 | C | -0.388952 | 1.370793  | 5.035972  |
| H | 0.316451  | -4.648962 | -3.317113 | C | 0.388952  | 5.046055  | -1.330728 |
| H | 0.548619  | -4.709998 | -5.588080 | C | 0.574674  | 6.249242  | -0.693480 |
| H | 0.548619  | -2.483352 | -6.873207 | C | 0.574674  | 6.249242  | 0.693480  |
| H | 0.316451  | -0.548514 | -5.684672 | C | 0.388952  | 5.046055  | 1.330728  |
| H | -0.316451 | -5.196754 | 2.367565  | C | -0.388952 | 1.370793  | -5.035972 |
| H | -0.548619 | -7.193567 | 1.285493  | C | -0.574674 | 2.524451  | -5.759085 |
| H | -0.548619 | -7.193567 | -1.285493 | C | -0.574674 | 3.725561  | -5.065499 |
| H | -0.316451 | -5.196754 | -2.367565 | C | -0.388952 | 3.675877  | -3.704804 |
| H | 0.316451  | -0.548514 | 5.684672  | C | 0.388952  | -3.675877 | -3.704804 |
| H | 0.548619  | -2.483352 | 6.873207  | C | 0.574674  | -3.725561 | -5.065499 |
| H | 0.548619  | -4.709998 | 5.588080  | C | 0.574674  | -2.524451 | -5.759085 |
| H | 0.316451  | -4.648962 | 3.317113  | C | 0.388952  | -1.370793 | -5.035972 |

72

cf4, c-HBC\_monomer with bowl depth: 0.39

|   |           |           |           |   |           |           |           |
|---|-----------|-----------|-----------|---|-----------|-----------|-----------|
| C | 0.174607  | 3.774941  | 0.715820  | C | 0.574674  | -2.524451 | 5.759085  |
| C | 0.174607  | 3.774941  | -0.715820 | C | 0.574674  | -3.725561 | 5.065499  |
| C | 0.000000  | 2.521952  | -1.456200 | C | 0.388952  | -3.675877 | 3.704804  |
| C | -0.174607 | 2.507550  | -2.911699 | H | -0.421934 | 4.634461  | 3.258073  |
| C | -0.174607 | 1.267834  | -3.627567 | H | -0.736515 | 4.684060  | 5.551155  |
| C | 0.000000  | 0.000000  | -2.912336 | H | -0.736515 | 2.466274  | 6.832014  |
| C | 0.174607  | -1.267834 | -3.627567 | H | -0.421934 | 0.504761  | 5.642821  |
| C | 0.174607  | -2.507550 | -2.911699 | H | 0.421934  | 5.139011  | -2.384193 |
| C | 0.000000  | -2.521952 | -1.456200 | H | 0.736515  | 7.149255  | -1.280464 |
| C | -0.174607 | -3.774941 | -0.715820 | H | 0.736515  | 7.149255  | 1.280464  |
| C | -0.174607 | -3.774941 | 0.715820  | H | 0.421934  | 5.139011  | 2.384193  |
| C | 0.000000  | -2.521952 | 1.456200  | H | -0.421934 | 0.504761  | -5.642821 |
| C | 0.174607  | -2.507550 | 2.911699  | H | -0.736515 | 2.466274  | -6.832014 |
| C | 0.174607  | -1.267834 | 3.627567  | H | -0.736515 | 4.684060  | -5.551155 |
| C | 0.000000  | 0.000000  | 2.912336  | H | -0.421934 | 4.634461  | -3.258073 |
| C | -0.174607 | 1.267834  | 3.627567  | H | 0.421934  | -4.634461 | -3.258073 |
| C | -0.174607 | 2.507550  | 2.911699  | H | 0.736515  | -4.684060 | -5.551155 |
| C | 0.000000  | 2.521952  | 1.456200  | H | 0.736515  | -2.466274 | -6.832014 |
| C | 0.000000  | 1.277889  | 0.737918  | H | 0.421934  | -0.504761 | -5.642821 |

|   |           |           |           |
|---|-----------|-----------|-----------|
| H | -0.421934 | -5.139011 | 2.384193  |
| H | -0.736515 | -7.149255 | 1.280464  |
| H | -0.736515 | -7.149255 | -1.280464 |
| H | -0.421934 | -5.139011 | -2.384193 |
| H | 0.421934  | -0.504761 | 5.642821  |
| H | 0.736515  | -2.466274 | 6.832014  |
| H | 0.736515  | -4.684060 | 5.551155  |
| H | 0.421934  | -4.634461 | 3.258073  |

72

cf5, c-HBC\_monomer with bowl depth: 0.49

|   |           |           |           |
|---|-----------|-----------|-----------|
| C | 0.217458  | 3.754460  | 0.715286  |
| C | 0.217458  | 3.754460  | -0.715286 |
| C | 0.000000  | 2.510453  | -1.449524 |
| C | -0.217458 | 2.497371  | -2.894357 |
| C | -0.217458 | 1.258405  | -3.609702 |
| C | 0.000000  | 0.000000  | -2.899080 |
| C | 0.217458  | -1.258405 | -3.609702 |
| C | 0.217458  | -2.497371 | -2.894357 |
| C | 0.000000  | -2.510453 | -1.449524 |
| C | -0.217458 | -3.754460 | -0.715286 |
| C | -0.217458 | -3.754460 | 0.715286  |
| C | 0.000000  | -2.510453 | 1.449524  |
| C | 0.217458  | -2.497371 | 2.894357  |
| C | 0.217458  | -1.258405 | 3.609702  |
| C | 0.000000  | 0.000000  | 2.899080  |
| C | -0.217458 | 1.258405  | 3.609702  |
| C | -0.217458 | 2.497371  | 2.894357  |
| C | 0.000000  | 2.510453  | 1.449524  |
| C | 0.000000  | 1.271173  | 0.734062  |
| C | 0.000000  | 1.271173  | -0.734062 |
| C | 0.000000  | 0.000000  | -1.468337 |
| C | 0.000000  | -1.271173 | -0.734062 |
| C | 0.000000  | -1.271173 | 0.734062  |
| C | 0.000000  | 0.000000  | 1.468337  |
| C | -0.486190 | 3.667036  | 3.664552  |
| C | -0.722272 | 3.701463  | 5.019369  |
| C | -0.722272 | 2.496800  | 5.714969  |
| C | -0.486190 | 1.340892  | 5.007554  |
| C | 0.486190  | 5.005983  | -1.343055 |
| C | 0.722272  | 6.196448  | -0.695580 |
| C | 0.722272  | 6.196448  | 0.695580  |
| C | 0.486190  | 5.005983  | 1.343055  |

|   |           |           |           |
|---|-----------|-----------|-----------|
| C | -0.486190 | 1.340892  | -5.007554 |
| C | -0.722272 | 2.496800  | -5.714969 |
| C | -0.722272 | 3.701463  | -5.019369 |
| C | -0.486190 | 3.667036  | -3.664552 |
| C | 0.486190  | -3.667036 | -3.664552 |
| C | 0.722272  | -3.701463 | -5.019369 |
| C | 0.722272  | -2.496800 | -5.714969 |
| C | 0.486190  | -1.340892 | -5.007554 |
| C | -0.486190 | -5.005983 | 1.343055  |
| C | -0.722272 | -6.196448 | 0.695580  |
| C | -0.722272 | -6.196448 | -0.695580 |
| C | -0.486190 | -5.005983 | -1.343055 |
| C | 0.486190  | -1.340892 | 5.007554  |
| C | 0.722272  | -2.496800 | 5.714969  |
| C | 0.722272  | -3.701463 | 5.019369  |
| C | 0.486190  | -3.667036 | 3.664552  |
| H | -0.527418 | 4.618364  | 3.191393  |
| H | -0.928725 | 4.650869  | 5.505913  |
| H | -0.928725 | 2.443411  | 6.780448  |
| H | -0.527418 | 0.455038  | 5.593979  |
| H | 0.527418  | 5.070676  | -2.403483 |
| H | 0.928725  | 7.092618  | -1.274425 |
| H | 0.928725  | 7.092618  | 1.274425  |
| H | 0.527418  | 5.070676  | 2.403483  |
| H | -0.527418 | 0.455038  | -5.593979 |
| H | -0.928725 | 2.443411  | -6.780448 |
| H | -0.928725 | 4.650869  | -5.505913 |
| H | -0.527418 | 4.618364  | -3.191393 |
| H | 0.527418  | -4.618364 | -3.191393 |
| H | 0.928725  | -4.650869 | -5.505913 |
| H | 0.928725  | -2.443411 | -6.780448 |
| H | 0.527418  | -0.455038 | -5.593979 |
| H | -0.527418 | -5.070676 | 2.403483  |
| H | -0.928725 | -7.092618 | 1.274425  |
| H | -0.928725 | -7.092618 | -1.274425 |
| H | -0.527418 | -5.070676 | -2.403483 |
| H | 0.527418  | -0.455038 | 5.593979  |
| H | 0.928725  | -2.443411 | 6.780448  |
| H | 0.928725  | -4.650869 | 5.505913  |
| H | 0.527418  | -4.618364 | 3.191393  |

72

cf6, c-HBC\_monomer with bowl depth: 0.58

|   |           |           |           |                                          |           |           |           |
|---|-----------|-----------|-----------|------------------------------------------|-----------|-----------|-----------|
| C | 0.260015  | 3.733455  | 0.715092  | C                                        | 0.872125  | -2.462701 | 5.665353  |
| C | 0.260015  | 3.733455  | -0.715092 | C                                        | 0.872125  | -3.671540 | 4.968530  |
| C | 0.000000  | 2.499105  | -1.443015 | C                                        | 0.583428  | -3.655344 | 3.621770  |
| C | -0.260015 | 2.486301  | -2.876389 | H                                        | -0.632901 | 4.599951  | 3.124325  |
| C | -0.260015 | 1.247422  | -3.590816 | H                                        | -1.124601 | 4.610131  | 5.454513  |
| C | 0.000000  | 0.000000  | -2.885236 | H                                        | -1.124601 | 2.412493  | 6.721105  |
| C | 0.260015  | -1.247422 | -3.590816 | H                                        | -0.632901 | 0.401276  | 5.542497  |
| C | 0.260015  | -2.486301 | -2.876389 | H                                        | 0.632901  | 5.001921  | -2.422646 |
| C | 0.000000  | -2.499105 | -1.443015 | H                                        | 1.124601  | 7.027370  | -1.268176 |
| C | -0.260015 | -3.733455 | -0.715092 | H                                        | 1.124601  | 7.027370  | 1.268176  |
| C | -0.260015 | -3.733455 | 0.715092  | H                                        | 0.632901  | 5.001921  | 2.422646  |
| C | 0.000000  | -2.499105 | 1.443015  | H                                        | -0.632901 | 0.401276  | -5.542497 |
| C | 0.260015  | -2.486301 | 2.876389  | H                                        | -1.124601 | 2.412493  | -6.721105 |
| C | 0.260015  | -1.247422 | 3.590816  | H                                        | -1.124601 | 4.610131  | -5.454513 |
| C | 0.000000  | 0.000000  | 2.885236  | H                                        | -0.632901 | 4.599951  | -3.124325 |
| C | -0.260015 | 1.247422  | 3.590816  | H                                        | 0.632901  | -4.599951 | -3.124325 |
| C | -0.260015 | 2.486301  | 2.876389  | H                                        | 1.124601  | -4.610131 | -5.454513 |
| C | 0.000000  | 2.499105  | 1.443015  | H                                        | 1.124601  | -2.412493 | -6.721105 |
| C | 0.000000  | 1.264792  | 0.730215  | H                                        | 0.632901  | -0.401276 | -5.542497 |
| C | 0.000000  | 1.264792  | -0.730215 | H                                        | -0.632901 | -5.001921 | 2.422646  |
| C | 0.000000  | 0.000000  | -1.460219 | H                                        | -1.124601 | -7.027370 | 1.268176  |
| C | 0.000000  | -1.264792 | -0.730215 | H                                        | -1.124601 | -7.027370 | -1.268176 |
| C | 0.000000  | -1.264792 | 0.730215  | H                                        | -0.632901 | -5.001921 | -2.422646 |
| C | 0.000000  | 0.000000  | 1.460219  | H                                        | 0.632901  | -0.401276 | 5.542497  |
| C | -0.583428 | 3.655344  | 3.621770  | H                                        | 1.124601  | -2.412493 | 6.721105  |
| C | -0.872125 | 3.671540  | 4.968530  | H                                        | 1.124601  | -4.610131 | 5.454513  |
| C | -0.872125 | 2.462701  | 5.665353  | H                                        | 0.632901  | -4.599951 | 3.124325  |
| C | -0.583428 | 1.306031  | 4.975903  |                                          |           |           |           |
| C | 0.583428  | 4.962635  | -1.355841 |                                          |           |           |           |
| C | 0.872125  | 6.137613  | -0.697684 |                                          |           |           |           |
| C | 0.872125  | 6.137613  | 0.697684  | 72                                       |           |           |           |
| C | 0.583428  | 4.962635  | 1.355841  | cf7, c-HBC_monomer with bowl depth: 0.68 |           |           |           |
| C | -0.583428 | 1.306031  | -4.975903 | C                                        | 0.302399  | 3.712718  | 0.715184  |
| C | -0.872125 | 2.462701  | -5.665353 | C                                        | 0.302399  | 3.712718  | -0.715184 |
| C | -0.872125 | 3.671540  | -4.968530 | C                                        | 0.000000  | 2.488680  | -1.436815 |
| C | -0.583428 | 3.655344  | -3.621770 | C                                        | -0.302399 | 2.475904  | -2.857940 |
| C | 0.583428  | -3.655344 | -3.621770 | C                                        | -0.302399 | 1.236993  | -3.572735 |
| C | 0.872125  | -3.671540 | -4.968530 | C                                        | 0.000000  | 0.000000  | -2.873399 |
| C | 0.872125  | -2.462701 | -5.665353 | C                                        | 0.302399  | -1.236993 | -3.572735 |
| C | 0.583428  | -1.306031 | -4.975903 | C                                        | 0.302399  | -2.475904 | -2.857940 |
| C | -0.583428 | -4.962635 | 1.355841  | C                                        | 0.000000  | -2.488680 | -1.436815 |
| C | -0.872125 | -6.137613 | 0.697684  | C                                        | -0.302399 | -3.712718 | -0.715184 |
| C | -0.872125 | -6.137613 | -0.697684 | C                                        | -0.302399 | -3.712718 | 0.715184  |
| C | -0.583428 | -4.962635 | -1.355841 | C                                        | 0.000000  | -2.488680 | 1.436815  |
| C | 0.583428  | -1.306031 | 4.975903  | C                                        | 0.302399  | -2.475904 | 2.857940  |



|   |           |           |           |                                          |           |           |           |
|---|-----------|-----------|-----------|------------------------------------------|-----------|-----------|-----------|
| C | 0.302399  | -1.236993 | 3.572735  | H                                        | -1.318590 | 4.570250  | -5.394106 |
| C | 0.000000  | 0.000000  | 2.873399  | H                                        | -0.738385 | 4.581226  | -3.056642 |
| C | -0.302399 | 1.236993  | 3.572735  | H                                        | 0.738385  | -4.581226 | -3.056642 |
| C | -0.302399 | 2.475904  | 2.857940  | H                                        | 1.318590  | -4.570250 | -5.394106 |
| C | 0.000000  | 2.488680  | 1.436815  | H                                        | 1.318590  | -2.383365 | -6.655566 |
| C | 0.000000  | 1.258800  | 0.726759  | H                                        | 0.738385  | -0.354480 | -5.494018 |
| C | 0.000000  | 1.258800  | -0.726759 | H                                        | -0.738385 | -4.936374 | 2.439744  |
| C | 0.000000  | 0.000000  | -1.453365 | H                                        | -1.318590 | -6.955908 | 1.262320  |
| C | 0.000000  | -1.258800 | -0.726759 | H                                        | -1.318590 | -6.955908 | -1.262320 |
| C | 0.000000  | -1.258800 | 0.726759  | H                                        | -0.738385 | -4.936374 | -2.439744 |
| C | 0.000000  | 0.000000  | 1.453365  | H                                        | 0.738385  | -0.354480 | 5.494018  |
| C | -0.680666 | 3.643188  | 3.575824  | H                                        | 1.318590  | -2.383365 | 6.655566  |
| C | -1.021411 | 3.642613  | 4.912222  | H                                        | 1.318590  | -4.570250 | 5.394106  |
| C | -1.021411 | 2.430751  | 5.611320  | H                                        | 0.738385  | -4.581226 | 3.056642  |
| C | -0.680666 | 1.273887  | 4.942558  |                                          |           |           |           |
| C | 0.680666  | 4.917656  | -1.367709 |                                          |           |           |           |
| C | 1.021411  | 6.075007  | -0.699550 |                                          |           |           |           |
| C | 1.021411  | 6.075007  | 0.699550  | 72                                       |           |           |           |
| C | 0.680666  | 4.917656  | 1.367709  | cf8, c-HBC_monomer with bowl depth: 0.78 |           |           |           |
| C | -0.680666 | 1.273887  | -4.942558 | C                                        | 0.342601  | 3.693207  | 0.715499  |
| C | -1.021411 | 2.430751  | -5.611320 | C                                        | 0.342601  | 3.693207  | -0.715499 |
| C | -1.021411 | 3.642613  | -4.912222 | C                                        | 0.000000  | 2.479858  | -1.431690 |
| C | -0.680666 | 3.643188  | -3.575824 | C                                        | -0.342601 | 2.466326  | -2.840747 |
| C | 0.680666  | -3.643188 | -3.575824 | C                                        | -0.342601 | 1.226933  | -3.556147 |
| C | 1.021411  | -3.642613 | -4.912222 | C                                        | 0.000000  | 0.000000  | -2.863424 |
| C | 1.021411  | -2.430751 | -5.611320 | C                                        | 0.342601  | -1.226933 | -3.556147 |
| C | 0.680666  | -1.273887 | -4.942558 | C                                        | 0.342601  | -2.466326 | -2.840747 |
| C | -0.680666 | -4.917656 | 1.367709  | C                                        | 0.000000  | -2.479858 | -1.431690 |
| C | -1.021411 | -6.075007 | 0.699550  | C                                        | -0.342601 | -3.693207 | -0.715499 |
| C | -1.021411 | -6.075007 | -0.699550 | C                                        | -0.342601 | -3.693207 | 0.715499  |
| C | -0.680666 | -4.917656 | -1.367709 | C                                        | 0.000000  | -2.479858 | 1.431690  |
| C | 0.680666  | -1.273887 | 4.942558  | C                                        | 0.342601  | -2.466326 | 2.840747  |
| C | 1.021411  | -2.430751 | 5.611320  | C                                        | 0.342601  | -1.226933 | 3.556147  |
| C | 1.021411  | -3.642613 | 4.912222  | C                                        | 0.000000  | 0.000000  | 2.863424  |
| C | 0.680666  | -3.643188 | 3.575824  | C                                        | -0.342601 | 1.226933  | 3.556147  |
| H | -0.738385 | 4.581226  | 3.056642  | C                                        | -0.342601 | 2.466326  | 2.840747  |
| H | -1.318590 | 4.570250  | 5.394106  | C                                        | 0.000000  | 2.479858  | 1.431690  |
| H | -1.318590 | 2.383365  | 6.655566  | C                                        | 0.000000  | 1.253749  | 0.723893  |
| H | -0.738385 | 0.354480  | 5.494018  | C                                        | 0.000000  | 1.253749  | -0.723893 |
| H | 0.738385  | 4.936374  | -2.439744 | C                                        | 0.000000  | 0.000000  | -1.447809 |
| H | 1.318590  | 6.955908  | -1.262320 | C                                        | 0.000000  | -1.253749 | -0.723893 |
| H | 1.318590  | 6.955908  | 1.262320  | C                                        | 0.000000  | -1.253749 | 0.723893  |
| H | 0.738385  | 4.936374  | 2.439744  | C                                        | 0.000000  | 0.000000  | 1.447809  |
| H | -0.738385 | 0.354480  | -5.494018 | C                                        | -0.777905 | 3.628540  | 3.530559  |
| H | -1.318590 | 2.383365  | -6.655566 | C                                        | -1.177082 | 3.610388  | 4.852189  |

|   |           |           |           |                                          |           |           |           |
|---|-----------|-----------|-----------|------------------------------------------|-----------|-----------|-----------|
| C | -1.177082 | 2.396154  | 5.553045  | H                                        | 0.843868  | -4.561236 | 2.994717  |
| C | -0.777905 | 1.242804  | 4.907557  |                                          |           |           |           |
| C | 0.777905  | 4.871586  | -1.377361 |                                          |           |           |           |
| C | 1.177082  | 6.007185  | -0.701015 | 72                                       |           |           |           |
| C | 1.177082  | 6.007185  | 0.701015  | cf9, c-HBC_monomer with bowl depth: 0.88 |           |           |           |
| C | 0.777905  | 4.871586  | 1.377361  |                                          |           |           |           |
| C | -0.777905 | 1.242804  | -4.907557 | C                                        | 0.383342  | 3.674611  | 0.716164  |
| C | -1.177082 | 2.396154  | -5.553045 | C                                        | 0.383342  | 3.674611  | -0.716164 |
| C | -1.177082 | 3.610388  | -4.852189 | C                                        | 0.000000  | 2.472708  | -1.427494 |
| C | -0.777905 | 3.628540  | -3.530559 | C                                        | -0.383342 | 2.457475  | -2.824075 |
| C | 0.777905  | -3.628540 | -3.530559 | C                                        | -0.383342 | 1.217043  | -3.540448 |
| C | 1.177082  | -3.610388 | -4.852189 | C                                        | 0.000000  | 0.000000  | -2.855361 |
| C | 1.177082  | -2.396154 | -5.553045 | C                                        | 0.383342  | -1.217043 | -3.540448 |
| C | 0.777905  | -1.242804 | -4.907557 | C                                        | 0.383342  | -2.457475 | -2.824075 |
| C | -0.777905 | -4.871586 | 1.377361  | C                                        | 0.000000  | -2.472708 | -1.427494 |
| C | -1.177082 | -6.007185 | 0.701015  | C                                        | -0.383342 | -3.674611 | -0.716164 |
| C | -1.177082 | -6.007185 | -0.701015 | C                                        | -0.383342 | -3.674611 | 0.716164  |
| C | -0.777905 | -4.871586 | -1.377361 | C                                        | 0.000000  | -2.472708 | 1.427494  |
| C | 0.777905  | -1.242804 | 4.907557  | C                                        | 0.383342  | -2.457475 | 2.824075  |
| C | 1.177082  | -2.396154 | 5.553045  | C                                        | 0.383342  | -1.217043 | 3.540448  |
| C | 1.177082  | -3.610388 | 4.852189  | C                                        | 0.000000  | 0.000000  | 2.855361  |
| C | 0.777905  | -3.628540 | 3.530559  | C                                        | -0.383342 | 1.217043  | 3.540448  |
| H | -0.843868 | 4.561236  | 2.994717  | C                                        | -0.383342 | 2.457475  | 2.824075  |
| H | -1.523799 | 4.525678  | 5.324479  | C                                        | 0.000000  | 2.472708  | 1.427494  |
| H | -1.523799 | 2.347226  | 6.581824  | C                                        | 0.000000  | 1.249661  | 0.721548  |
| H | -0.843868 | 0.312211  | 5.446957  | C                                        | 0.000000  | 1.249661  | -0.721548 |
| H | 0.843868  | 4.873694  | -2.453113 | C                                        | 0.000000  | 0.000000  | -1.443188 |
| H | 1.523799  | 6.873742  | -1.257659 | C                                        | 0.000000  | -1.249661 | -0.721548 |
| H | 1.523799  | 6.873742  | 1.257659  | C                                        | 0.000000  | -1.249661 | 0.721548  |
| H | 0.843868  | 4.873694  | 2.453113  | C                                        | 0.000000  | 0.000000  | 1.443188  |
| H | -0.843868 | 0.312211  | -5.446957 | C                                        | -0.875143 | 3.612157  | 3.485617  |
| H | -1.523799 | 2.347226  | -6.581824 | C                                        | -1.326034 | 3.577647  | 4.791755  |
| H | -1.523799 | 4.525678  | -5.324479 | C                                        | -1.326034 | 2.361565  | 5.494155  |
| H | -0.843868 | 4.561236  | -2.994717 | C                                        | -0.875143 | 1.212964  | 4.871324  |
| H | 0.843868  | -4.561236 | -2.994717 | C                                        | 0.875143  | 4.825039  | -1.385311 |
| H | 1.523799  | -4.525678 | -5.324479 | C                                        | 1.326034  | 5.938833  | -0.702196 |
| H | 1.523799  | -2.347226 | -6.581824 | C                                        | 1.326034  | 5.938833  | 0.702196  |
| H | 0.843868  | -0.312211 | -5.446957 | C                                        | 0.875143  | 4.825039  | 1.385311  |
| H | -0.843868 | -4.873694 | 2.453113  | C                                        | -0.875143 | 1.212964  | -4.871324 |
| H | -1.523799 | -6.873742 | 1.257659  | C                                        | -1.326034 | 2.361565  | -5.494155 |
| H | -1.523799 | -6.873742 | -1.257659 | C                                        | -1.326034 | 3.577647  | -4.791755 |
| H | -0.843868 | -4.873694 | -2.453113 | C                                        | -0.875143 | 3.612157  | -3.485617 |
| H | 0.843868  | -0.312211 | 5.446957  | C                                        | 0.875143  | -3.612157 | -3.485617 |
| H | 1.523799  | -2.347226 | 6.581824  | C                                        | 1.326034  | -3.577647 | -4.791755 |
| H | 1.523799  | -4.525678 | 5.324479  | C                                        | 1.326034  | -2.361565 | -5.494155 |

|   |           |           |           |   |           |           |           |
|---|-----------|-----------|-----------|---|-----------|-----------|-----------|
| C | 0.875143  | -1.212964 | -4.871324 | C | 0.422503  | -2.448608 | -2.807547 |
| C | -0.875143 | -4.825039 | 1.385311  | C | 0.000000  | -2.466249 | -1.423834 |
| C | -1.326034 | -5.938833 | 0.702196  | C | -0.422503 | -3.655806 | -0.716950 |
| C | -1.326034 | -5.938833 | -0.702196 | C | -0.422503 | -3.655806 | 0.716950  |
| C | -0.875143 | -4.825039 | -1.385311 | C | 0.000000  | -2.466249 | 1.423834  |
| C | 0.875143  | -1.212964 | 4.871324  | C | 0.422503  | -2.448608 | 2.807547  |
| C | 1.326034  | -2.361565 | 5.494155  | C | 0.422503  | -1.206820 | 3.524503  |
| C | 1.326034  | -3.577647 | 4.791755  | C | 0.000000  | 0.000000  | 2.847667  |
| C | 0.875143  | -3.612157 | 3.485617  | C | -0.422503 | 1.206820  | 3.524503  |
| H | -0.949352 | 4.539775  | 2.935734  | C | -0.422503 | 2.448608  | 2.807547  |
| H | -1.716558 | 4.481294  | 5.252371  | C | 0.000000  | 2.466249  | 1.423834  |
| H | -1.716558 | 2.309174  | 6.507044  | C | 0.000000  | 1.246049  | 0.719408  |
| H | -0.949352 | 0.273097  | 5.399982  | C | 0.000000  | 1.246049  | -0.719408 |
| H | 0.949352  | 4.812830  | -2.463693 | C | 0.000000  | 0.000000  | -1.438745 |
| H | 1.716558  | 6.789700  | -1.254227 | C | 0.000000  | -1.246049 | -0.719408 |
| H | 1.716558  | 6.789700  | 1.254227  | C | 0.000000  | -1.246049 | 0.719408  |
| H | 0.949352  | 4.812830  | 2.463693  | C | 0.000000  | 0.000000  | 1.438745  |
| H | -0.949352 | 0.273097  | -5.399982 | C | -0.972381 | 3.592716  | 3.439074  |
| H | -1.716558 | 2.309174  | -6.507044 | C | -1.478730 | 3.539577  | 4.725616  |
| H | -1.716558 | 4.481294  | -5.252371 | C | -1.478730 | 2.321708  | 5.428703  |
| H | -0.949352 | 4.539775  | -2.935734 | C | -0.972381 | 1.181228  | 4.831145  |
| H | 0.949352  | -4.539775 | -2.935734 | C | 0.972381  | 4.774679  | -1.392136 |
| H | 1.716558  | -4.481294 | -5.252371 | C | 1.478730  | 5.862372  | -0.703121 |
| H | 1.716558  | -2.309174 | -6.507044 | C | 1.478730  | 5.862372  | 0.703121  |
| H | 0.949352  | -0.273097 | -5.399982 | C | 0.972381  | 4.774679  | 1.392136  |
| H | -0.949352 | -4.812830 | 2.463693  | C | -0.972381 | 1.181228  | -4.831145 |
| H | -1.716558 | -6.789700 | 1.254227  | C | -1.478730 | 2.321708  | -5.428703 |
| H | -1.716558 | -6.789700 | -1.254227 | C | -1.478730 | 3.539577  | -4.725616 |
| H | -0.949352 | -4.812830 | -2.463693 | C | -0.972381 | 3.592716  | -3.439074 |
| H | 0.949352  | -0.273097 | 5.399982  | C | 0.972381  | -3.592716 | -3.439074 |
| H | 1.716558  | -2.309174 | 6.507044  | C | 1.478730  | -3.539577 | -4.725616 |
| H | 1.716558  | -4.481294 | 5.252371  | C | 1.478730  | -2.321708 | -5.428703 |
| H | 0.949352  | -4.539775 | 2.935734  | C | 0.972381  | -1.181228 | -4.831145 |
|   |           |           |           | C | -0.972381 | -4.774679 | 1.392136  |
|   |           |           |           | C | -1.478730 | -5.862372 | 0.703121  |
|   |           |           |           | C | -1.478730 | -5.862372 | -0.703121 |
|   |           |           |           | C | -0.972381 | -4.774679 | -1.392136 |
|   |           |           |           | C | 0.972381  | -1.181228 | 4.831145  |
|   |           |           |           | C | 1.478730  | -2.321708 | 5.428703  |
|   |           |           |           | C | 1.478730  | -3.539577 | 4.725616  |
|   |           |           |           | C | 0.972381  | -3.592716 | 3.439074  |
|   |           |           |           | H | -1.054835 | 4.514831  | 2.875927  |
|   |           |           |           | H | -1.916870 | 4.429041  | 5.170770  |
|   |           |           |           | H | -1.916870 | 2.262238  | 6.421544  |
|   |           |           |           | H | -1.054835 | 0.232345  | 5.347771  |

72  
cf10, c-HBC\_monomer with bowl depth: 0.97

|   |           |           |           |   |           |           |           |
|---|-----------|-----------|-----------|---|-----------|-----------|-----------|
| C | 0.422503  | 3.655806  | 0.716950  | C | 0.422503  | 3.655806  | 0.716950  |
| C | 0.422503  | 3.655806  | -0.716950 | C | 0.422503  | 3.655806  | -0.716950 |
| C | 0.000000  | 2.466249  | -1.423834 | C | 0.000000  | 2.466249  | -1.423834 |
| C | -0.422503 | 2.448608  | -2.807547 | C | -0.422503 | 2.448608  | -2.807547 |
| C | -0.422503 | 1.206820  | -3.524503 | C | -0.422503 | 1.206820  | -3.524503 |
| C | 0.000000  | 0.000000  | -2.847667 | C | 0.000000  | 0.000000  | -2.847667 |
| C | 0.422503  | -1.206820 | -3.524503 | C | 0.422503  | -1.206820 | -3.524503 |

|   |           |           |           |   |           |           |           |
|---|-----------|-----------|-----------|---|-----------|-----------|-----------|
| H | 1.054835  | 4.747651  | -2.472254 | C | 0.000000  | 0.000000  | -1.435841 |
| H | 1.916870  | 6.692546  | -1.250943 | C | 0.000000  | -1.243675 | -0.717977 |
| H | 1.916870  | 6.692546  | 1.250943  | C | 0.000000  | -1.243675 | 0.717977  |
| H | 1.054835  | 4.747651  | 2.472254  | C | 0.000000  | 0.000000  | 1.435841  |
| H | -1.054835 | 0.232345  | -5.347771 | C | -1.069619 | 3.571653  | 3.394077  |
| H | -1.916870 | 2.262238  | -6.421544 | C | -1.628344 | 3.500587  | 4.659123  |
| H | -1.916870 | 4.429041  | -5.170770 | C | -1.628344 | 2.281665  | 5.362358  |
| H | -1.054835 | 4.514831  | -2.875927 | C | -1.069619 | 1.151351  | 4.790062  |
| H | 1.054835  | -4.514831 | -2.875927 | C | 1.069619  | 4.724691  | -1.396729 |
| H | 1.916870  | -4.429041 | -5.170770 | C | 1.628344  | 5.785202  | -0.703581 |
| H | 1.916870  | -2.262238 | -6.421544 | C | 1.628344  | 5.785202  | 0.703581  |
| H | 1.054835  | -0.232345 | -5.347771 | C | 1.069619  | 4.724691  | 1.396729  |
| H | -1.054835 | -4.747651 | 2.472254  | C | -1.069619 | 1.151351  | -4.790062 |
| H | -1.916870 | -6.692546 | 1.250943  | C | -1.628344 | 2.281665  | -5.362358 |
| H | -1.916870 | -6.692546 | -1.250943 | C | -1.628344 | 3.500587  | -4.659123 |
| H | -1.054835 | -4.747651 | -2.472254 | C | -1.069619 | 3.571653  | -3.394077 |
| H | 1.054835  | -0.232345 | 5.347771  | C | 1.069619  | -3.571653 | -3.394077 |
| H | 1.916870  | -2.262238 | 6.421544  | C | 1.628344  | -3.500587 | -4.659123 |
| H | 1.916870  | -4.429041 | 5.170770  | C | 1.628344  | -2.281665 | -5.362358 |
| H | 1.054835  | -4.514831 | 2.875927  | C | 1.069619  | -1.151351 | -4.790062 |

72

cf11, c-HBC\_monomer with bowl depth: 1.07

|   |           |           |           |   |           |           |           |
|---|-----------|-----------|-----------|---|-----------|-----------|-----------|
| C | 0.461320  | 3.639058  | 0.718044  | C | 1.628344  | -2.281665 | 5.362358  |
| C | 0.461320  | 3.639058  | -0.718044 | C | 1.628344  | -3.500587 | 4.659123  |
| C | 0.000000  | 2.462031  | -1.421454 | C | 1.069619  | -3.571653 | 3.394077  |
| C | -0.461320 | 2.441192  | -2.792638 | H | -1.160319 | 4.489091  | 2.821383  |
| C | -0.461320 | 1.197407  | -3.510444 | H | -2.110820 | 4.375892  | 5.086347  |
| C | 0.000000  | 0.000000  | -2.842357 | H | -2.110820 | 2.213221  | 6.333905  |
| C | 0.461320  | -1.197407 | -3.510444 | H | -1.160319 | 0.195490  | 5.296036  |
| C | 0.461320  | -2.441192 | -2.792638 | H | 1.160319  | 4.685905  | -2.477483 |
| C | 0.000000  | -2.462031 | -1.421454 | H | 2.110820  | 6.592538  | -1.248419 |
| C | -0.461320 | -3.639058 | -0.718044 | H | 2.110820  | 6.592538  | 1.248419  |
| C | -0.461320 | -3.639058 | 0.718044  | H | 1.160319  | 4.685905  | 2.477483  |
| C | 0.000000  | -2.462031 | 1.421454  | H | -1.160319 | 0.195490  | -5.296036 |
| C | 0.461320  | -2.441192 | 2.792638  | H | -2.110820 | 2.213221  | -6.333905 |
| C | 0.461320  | -1.197407 | 3.510444  | H | -2.110820 | 4.375892  | -5.086347 |
| C | 0.000000  | 0.000000  | 2.842357  | H | -1.160319 | 4.489091  | -2.821383 |
| C | -0.461320 | 1.197407  | 3.510444  | H | 1.160319  | -4.489091 | -2.821383 |
| C | -0.461320 | 2.441192  | 2.792638  | H | 2.110820  | -4.375892 | -5.086347 |
| C | 0.000000  | 2.462031  | 1.421454  | H | 2.110820  | -2.213221 | -6.333905 |
| C | 0.000000  | 1.243675  | 0.717977  | H | 1.160319  | -0.195490 | -5.296036 |
| C | 0.000000  | 1.243675  | -0.717977 | H | -1.160319 | -4.685905 | 2.477483  |

|   |           |           |           |
|---|-----------|-----------|-----------|
| H | -2.110820 | -6.592538 | 1.248419  |
| H | -2.110820 | -6.592538 | -1.248419 |
| H | -1.160319 | -4.685905 | -2.477483 |
| H | 1.160319  | -0.195490 | 5.296036  |
| H | 2.110820  | -2.213221 | 6.333905  |
| H | 2.110820  | -4.375892 | 5.086347  |
| H | 1.160319  | -4.489091 | 2.821383  |

72

cf12, c-HBC\_monomer with bowl depth: 1.17

|   |           |           |           |
|---|-----------|-----------|-----------|
| C | 0.499903  | 3.622018  | 0.719085  |
| C | 0.499903  | 3.622018  | -0.719085 |
| C | 0.000000  | 2.458433  | -1.419277 |
| C | -0.499903 | 2.433585  | -2.777166 |
| C | -0.499903 | 1.188048  | -3.496066 |
| C | 0.000000  | 0.000000  | -2.838326 |
| C | 0.499903  | -1.188048 | -3.496066 |
| C | 0.499903  | -2.433585 | -2.777166 |
| C | 0.000000  | -2.458433 | -1.419277 |
| C | -0.499903 | -3.622018 | -0.719085 |
| C | -0.499903 | -3.622018 | 0.719085  |
| C | 0.000000  | -2.458433 | 1.419277  |
| C | 0.499903  | -2.433585 | 2.777166  |
| C | 0.499903  | -1.188048 | 3.496066  |
| C | 0.000000  | 0.000000  | 2.838326  |
| C | -0.499903 | 1.188048  | 3.496066  |
| C | -0.499903 | 2.433585  | 2.777166  |
| C | 0.000000  | 2.458433  | 1.419277  |
| C | 0.000000  | 1.241653  | 0.716816  |
| C | 0.000000  | 1.241653  | -0.716816 |
| C | 0.000000  | 0.000000  | -1.433348 |
| C | 0.000000  | -1.241653 | -0.716816 |
| C | 0.000000  | -1.241653 | 0.716816  |
| C | 0.000000  | 0.000000  | 1.433348  |
| C | -1.166857 | 3.547605  | 3.345992  |
| C | -1.781150 | 3.458236  | 4.584555  |
| C | -1.781150 | 2.239210  | 5.288008  |
| C | -1.166857 | 1.122428  | 4.745123  |
| C | 1.166857  | 4.671374  | -1.399719 |
| C | 1.781150  | 5.699690  | -0.703683 |
| C | 1.781150  | 5.699690  | 0.703683  |
| C | 1.166857  | 4.671374  | 1.399719  |
| C | -1.166857 | 1.122428  | -4.745123 |

|   |           |           |           |
|---|-----------|-----------|-----------|
| C | -1.781150 | 2.239210  | -5.288008 |
| C | -1.781150 | 3.458236  | -4.584555 |
| C | -1.166857 | 3.547605  | -3.345992 |
| C | 1.166857  | -3.547605 | -3.345992 |
| C | 1.781150  | -3.458236 | -4.584555 |
| C | 1.781150  | -2.239210 | -5.288008 |
| C | 1.166857  | -1.122428 | -4.745123 |
| C | -1.166857 | -4.671374 | 1.399719  |
| C | -1.781150 | -5.699690 | 0.703683  |
| C | -1.781150 | -5.699690 | -0.703683 |
| C | -1.166857 | -4.671374 | -1.399719 |
| C | 1.166857  | -1.122428 | 4.745123  |
| C | 1.781150  | -2.239210 | 5.288008  |
| C | 1.781150  | -3.458236 | 4.584555  |
| C | 1.166857  | -3.547605 | 3.345992  |
| H | -1.265802 | 4.459676  | 2.764373  |
| H | -2.310753 | 4.317751  | 4.987444  |
| H | -2.310753 | 2.157766  | 6.233721  |
| H | -1.265802 | 0.162013  | 5.242908  |
| H | 1.265802  | 4.622907  | -2.480457 |
| H | 2.310753  | 6.478085  | -1.246964 |
| H | 2.310753  | 6.478085  | 1.246964  |
| H | 1.265802  | 4.622907  | 2.480457  |
| H | -1.265802 | 0.162013  | -5.242908 |
| H | -2.310753 | 2.157766  | -6.233721 |
| H | -2.310753 | 4.317751  | -4.987444 |
| H | -1.265802 | 4.459676  | -2.764373 |
| H | 1.265802  | -4.459676 | -2.764373 |
| H | 2.310753  | -4.317751 | -4.987444 |
| H | 2.310753  | -2.157766 | -6.233721 |
| H | 1.265802  | -0.162013 | -5.242908 |
| H | -1.265802 | -4.622907 | 2.480457  |
| H | -2.310753 | -6.478085 | 1.246964  |
| H | -2.310753 | -6.478085 | -1.246964 |
| H | -1.265802 | -4.622907 | -2.480457 |
| H | 1.265802  | -0.162013 | 5.242908  |
| H | 2.310753  | -2.157766 | 6.233721  |
| H | 2.310753  | -4.317751 | 4.987444  |
| H | 1.265802  | -4.459676 | 2.764373  |

72

cf13, c-HBC\_monomer with bowl depth: 1.26

|   |          |          |          |
|---|----------|----------|----------|
| C | 0.539256 | 3.605395 | 0.720380 |
|---|----------|----------|----------|

|   |           |           |           |
|---|-----------|-----------|-----------|
| C | 0.539256  | 3.605395  | -0.720380 |
| C | 0.000000  | 2.456228  | -1.418051 |
| C | -0.539256 | 2.426441  | -2.762191 |
| C | -0.539256 | 1.178533  | -3.482296 |
| C | 0.000000  | 0.000000  | -2.835579 |
| C | 0.539256  | -1.178533 | -3.482296 |
| C | 0.539256  | -2.426441 | -2.762191 |
| C | 0.000000  | -2.456228 | -1.418051 |
| C | -0.539256 | -3.605395 | -0.720380 |
| C | -0.539256 | -3.605395 | 0.720380  |
| C | 0.000000  | -2.456228 | 1.418051  |
| C | 0.539256  | -2.426441 | 2.762191  |
| C | 0.539256  | -1.178533 | 3.482296  |
| C | 0.000000  | 0.000000  | 2.835579  |
| C | -0.539256 | 1.178533  | 3.482296  |
| C | -0.539256 | 2.426441  | 2.762191  |
| C | 0.000000  | 2.456228  | 1.418051  |
| C | 0.000000  | 1.240315  | 0.715998  |
| C | 0.000000  | 1.240315  | -0.715998 |
| C | 0.000000  | 0.000000  | -1.431769 |
| C | 0.000000  | -1.240315 | -0.715998 |
| C | 0.000000  | -1.240315 | 0.715998  |
| C | 0.000000  | 0.000000  | 1.431769  |
| C | -1.264095 | 3.521268  | 3.297863  |
| C | -1.930746 | 3.413542  | 4.508142  |
| C | -1.930746 | 2.194654  | 5.211194  |
| C | -1.264095 | 1.093371  | 4.697928  |
| C | 1.264095  | 4.616242  | -1.401147 |
| C | 1.930746  | 5.611058  | -0.703523 |
| C | 1.930746  | 5.611058  | 0.703523  |
| C | 1.264095  | 4.616242  | 1.401147  |
| C | -1.264095 | 1.093371  | -4.697928 |
| C | -1.930746 | 2.194654  | -5.211194 |
| C | -1.930746 | 3.413542  | -4.508142 |
| C | -1.264095 | 3.521268  | -3.297863 |
| C | 1.264095  | -3.521268 | -3.297863 |
| C | 1.930746  | -3.413542 | -4.508142 |
| C | 1.930746  | -2.194654 | -5.211194 |
| C | 1.264095  | -1.093371 | -4.697928 |
| C | -1.264095 | -4.616242 | 1.401147  |
| C | -1.930746 | -5.611058 | 0.703523  |
| C | -1.930746 | -5.611058 | -0.703523 |
| C | -1.264095 | -4.616242 | -1.401147 |
| C | 1.264095  | -1.093371 | 4.697928  |
| C | 1.930746  | -2.194654 | 5.211194  |

|   |           |           |           |
|---|-----------|-----------|-----------|
| C | 1.930746  | -3.413542 | 4.508142  |
| C | 1.264095  | -3.521268 | 3.297863  |
| H | -1.371286 | 4.429087  | 2.709979  |
| H | -2.503532 | 4.257091  | 4.884800  |
| H | -2.503532 | 2.098110  | 6.129927  |
| H | -1.371286 | 0.129289  | 5.188119  |
| H | 1.371286  | 4.559579  | -2.481229 |
| H | 2.503532  | 6.358592  | -1.246305 |
| H | 2.503532  | 6.358592  | 1.246305  |
| H | 1.371286  | 4.559579  | 2.481229  |
| H | -1.371286 | 0.129289  | -5.188119 |
| H | -2.503532 | 2.098110  | -6.129927 |
| H | -2.503532 | 4.257091  | -4.884800 |
| H | -1.371286 | 4.429087  | -2.709979 |
| H | 1.371286  | -4.429087 | -2.709979 |
| H | 2.503532  | -4.257091 | -4.884800 |
| H | 2.503532  | -2.098110 | -6.129927 |
| H | 1.371286  | -0.129289 | -5.188119 |
| H | -1.371286 | -4.559579 | 2.481229  |
| H | -2.503532 | -6.358592 | 1.246305  |
| H | -2.503532 | -6.358592 | -1.246305 |
| H | -1.371286 | -4.559579 | -2.481229 |
| H | 1.371286  | -0.129289 | 5.188119  |
| H | 2.503532  | -2.098110 | 6.129927  |
| H | 2.503532  | -4.257091 | 4.884800  |
| H | 1.371286  | -4.429087 | 2.709979  |

72

cf14, c-HBC\_monomer with bowl depth: 1.36

|   |           |           |           |
|---|-----------|-----------|-----------|
| C | 0.579456  | 3.587945  | 0.721714  |
| C | 0.579456  | 3.587945  | -0.721714 |
| C | 0.000000  | 2.454289  | -1.416911 |
| C | -0.579456 | 2.418869  | -2.746292 |
| C | -0.579456 | 1.168767  | -3.468029 |
| C | 0.000000  | 0.000000  | -2.833756 |
| C | 0.579456  | -1.168767 | -3.468029 |
| C | 0.579456  | -2.418869 | -2.746292 |
| C | 0.000000  | -2.454289 | -1.416911 |
| C | -0.579456 | -3.587945 | -0.721714 |
| C | -0.579456 | -3.587945 | 0.721714  |
| C | 0.000000  | -2.454289 | 1.416911  |
| C | 0.579456  | -2.418869 | 2.746292  |
| C | 0.579456  | -1.168767 | 3.468029  |

|   |           |           |           |                                           |           |           |           |
|---|-----------|-----------|-----------|-------------------------------------------|-----------|-----------|-----------|
| C | 0.000000  | 0.000000  | 2.833756  | H                                         | -1.476769 | 4.395381  | -2.650807 |
| C | -0.579456 | 1.168767  | 3.468029  | H                                         | 1.476769  | -4.395381 | -2.650807 |
| C | -0.579456 | 2.418869  | 2.746292  | H                                         | 2.693746  | -4.193065 | -4.771612 |
| C | 0.000000  | 2.454289  | 1.416911  | H                                         | 2.693746  | -2.034811 | -6.017306 |
| C | 0.000000  | 1.239148  | 0.715383  | H                                         | 1.476769  | -0.097072 | -5.130953 |
| C | 0.000000  | 1.239148  | -0.715383 | H                                         | -1.476769 | -4.492529 | 2.481171  |
| C | 0.000000  | 0.000000  | -1.430689 | H                                         | -2.693746 | -6.228819 | 1.246054  |
| C | 0.000000  | -1.239148 | -0.715383 | H                                         | -2.693746 | -6.228819 | -1.246054 |
| C | 0.000000  | -1.239148 | 0.715383  | H                                         | -1.476769 | -4.492529 | -2.481171 |
| C | 0.000000  | 0.000000  | 1.430689  | H                                         | 1.476769  | -0.097072 | 5.130953  |
| C | -1.361333 | 3.492607  | 3.245605  | H                                         | 2.693746  | -2.034811 | 6.017306  |
| C | -2.079166 | 3.366327  | 4.424804  | H                                         | 2.693746  | -4.193065 | 4.771612  |
| C | -2.079166 | 2.148120  | 5.127952  | H                                         | 1.476769  | -4.395381 | 2.650807  |
| C | -1.361333 | 1.063941  | 4.647319  |                                           |           |           |           |
| C | 1.361333  | 4.557030  | -1.402022 |                                           |           |           |           |
| C | 2.079166  | 5.515288  | -0.703255 |                                           |           |           |           |
| C | 2.079166  | 5.515288  | 0.703255  | 72                                        |           |           |           |
| C | 1.361333  | 4.557030  | 1.402022  | cf15, c-HBC_monomer with bowl depth: 1.46 |           |           |           |
| C | -1.361333 | 1.063941  | -4.647319 | C                                         | 0.620602  | 3.569082  | 0.723231  |
| C | -2.079166 | 2.148120  | -5.127952 | C                                         | 0.620602  | 3.569082  | -0.723231 |
| C | -2.079166 | 3.366327  | -4.424804 | C                                         | 0.000000  | 2.452588  | -1.415951 |
| C | -1.361333 | 3.492607  | -3.245605 | C                                         | -0.620602 | 2.410719  | -2.729199 |
| C | 1.361333  | -3.492607 | -3.245605 | C                                         | -0.620602 | 1.157997  | -3.452525 |
| C | 2.079166  | -3.366327 | -4.424804 | C                                         | 0.000000  | 0.000000  | -2.831871 |
| C | 2.079166  | -2.148120 | -5.127952 | C                                         | 0.620602  | -1.157997 | -3.452525 |
| C | 1.361333  | -1.063941 | -4.647319 | C                                         | 0.620602  | -2.410719 | -2.729199 |
| C | -1.361333 | -4.557030 | 1.402022  | C                                         | 0.000000  | -2.452588 | -1.415951 |
| C | -2.079166 | -5.515288 | 0.703255  | C                                         | -0.620602 | -3.569082 | -0.723231 |
| C | -2.079166 | -5.515288 | -0.703255 | C                                         | -0.620602 | -3.569082 | 0.723231  |
| C | -1.361333 | -4.557030 | -1.402022 | C                                         | 0.000000  | -2.452588 | 1.415951  |
| C | 1.361333  | -1.063941 | 4.647319  | C                                         | 0.620602  | -2.410719 | 2.729199  |
| C | 2.079166  | -2.148120 | 5.127952  | C                                         | 0.620602  | -1.157997 | 3.452525  |
| C | 2.079166  | -3.366327 | 4.424804  | C                                         | 0.000000  | 0.000000  | 2.831871  |
| C | 1.361333  | -3.492607 | 3.245605  | C                                         | -0.620602 | 1.157997  | 3.452525  |
| H | -1.476769 | 4.395381  | 2.650807  | C                                         | -0.620602 | 2.410719  | 2.729199  |
| H | -2.693746 | 4.193065  | 4.771612  | C                                         | 0.000000  | 2.452588  | 1.415951  |
| H | -2.693746 | 2.034811  | 6.017306  | C                                         | 0.000000  | 1.238078  | 0.714775  |
| H | -1.476769 | 0.097072  | 5.130953  | C                                         | 0.000000  | 1.238078  | -0.714775 |
| H | 1.476769  | 4.492529  | -2.481171 | C                                         | 0.000000  | 0.000000  | -1.429510 |
| H | 2.693746  | 6.228819  | -1.246054 | C                                         | 0.000000  | -1.238078 | -0.714775 |
| H | 2.693746  | 6.228819  | 1.246054  | C                                         | 0.000000  | -1.238078 | 0.714775  |
| H | 1.476769  | 4.492529  | 2.481171  | C                                         | 0.000000  | 0.000000  | 1.429510  |
| H | -1.476769 | 0.097072  | -5.130953 | C                                         | -1.458571 | 3.460759  | 3.189520  |
| H | -2.693746 | 2.034811  | -6.017306 | C                                         | -2.226120 | 3.314193  | 4.334928  |
| H | -2.693746 | 4.193065  | -4.771612 | C                                         | -2.226120 | 2.096728  | 5.037721  |

|   |           |           |           |
|---|-----------|-----------|-----------|
| C | -1.458571 | 1.031534  | 4.591870  |
| C | 1.458571  | 4.492509  | -1.402615 |
| C | 2.226120  | 5.411118  | -0.702854 |
| C | 2.226120  | 5.411118  | 0.702854  |
| C | 1.458571  | 4.492509  | 1.402615  |
| C | -1.458571 | 1.031534  | -4.591870 |
| C | -2.226120 | 2.096728  | -5.037721 |
| C | -2.226120 | 3.314193  | -4.334928 |
| C | -1.458571 | 3.460759  | -3.189520 |
| C | 1.458571  | -3.460759 | -3.189520 |
| C | 2.226120  | -3.314193 | -4.334928 |
| C | 2.226120  | -2.096728 | -5.037721 |
| C | 1.458571  | -1.031534 | -4.591870 |
| C | -1.458571 | -4.492509 | 1.402615  |
| C | -2.226120 | -5.411118 | 0.702854  |
| C | -2.226120 | -5.411118 | -0.702854 |
| C | -1.458571 | -4.492509 | -1.402615 |
| C | 1.458571  | -1.031534 | 4.591870  |
| C | 2.226120  | -2.096728 | 5.037721  |
| C | 2.226120  | -3.314193 | 4.334928  |
| C | 1.458571  | -3.460759 | 3.189520  |
| H | -1.582253 | 4.358006  | 2.587502  |
| H | -2.880742 | 4.122751  | 4.649816  |
| H | -2.880742 | 1.964996  | 5.895406  |
| H | -1.582253 | 0.061339  | 5.067512  |
| H | 1.582253  | 4.419424  | -2.480657 |
| H | 2.880742  | 6.088115  | -1.245627 |
| H | 2.880742  | 6.088115  | 1.245627  |
| H | 1.582253  | 4.419424  | 2.480657  |
| H | -1.582253 | 0.061339  | -5.067512 |
| H | -2.880742 | 1.964996  | -5.895406 |
| H | -2.880742 | 4.122751  | -4.649816 |
| H | -1.582253 | 4.358006  | -2.587502 |
| H | 1.582253  | -4.358006 | -2.587502 |
| H | 2.880742  | -4.122751 | -4.649816 |
| H | 2.880742  | -1.964996 | -5.895406 |
| H | 1.582253  | -0.061339 | -5.067512 |
| H | -1.582253 | -4.419424 | 2.480657  |
| H | -2.880742 | -6.088115 | 1.245627  |
| H | -2.880742 | -6.088115 | -1.245627 |
| H | -1.582253 | -4.419424 | -2.480657 |
| H | 1.582253  | -0.061339 | 5.067512  |
| H | 2.880742  | -1.964996 | 5.895406  |
| H | 2.880742  | -4.122751 | 4.649816  |
| H | 1.582253  | -4.358006 | 2.587502  |

72

cf16, c-HBC\_monomer with bowl depth: 1.56

|   |           |           |           |
|---|-----------|-----------|-----------|
| C | 0.663197  | 3.548373  | 0.724881  |
| C | 0.663197  | 3.548373  | -0.724881 |
| C | 0.000000  | 2.451021  | -1.415072 |
| C | -0.663197 | 2.401820  | -2.710471 |
| C | -0.663197 | 1.146238  | -3.435471 |
| C | 0.000000  | 0.000000  | -2.829997 |
| C | 0.663197  | -1.146238 | -3.435471 |
| C | 0.663197  | -2.401820 | -2.710471 |
| C | 0.000000  | -2.451021 | -1.415072 |
| C | -0.663197 | -3.548373 | -0.724881 |
| C | -0.663197 | -3.548373 | 0.724881  |
| C | 0.000000  | -2.451021 | 1.415072  |
| C | 0.663197  | -2.401820 | 2.710471  |
| C | 0.663197  | -1.146238 | 3.435471  |
| C | 0.000000  | 0.000000  | 2.829997  |
| C | -0.663197 | 1.146238  | 3.435471  |
| C | -0.663197 | 2.401820  | 2.710471  |
| C | 0.000000  | 2.451021  | 1.415072  |
| C | 0.000000  | 1.237031  | 0.714145  |
| C | 0.000000  | 1.237031  | -0.714145 |
| C | 0.000000  | 0.000000  | -1.428285 |
| C | 0.000000  | -1.237031 | -0.714145 |
| C | 0.000000  | -1.237031 | 0.714145  |
| C | 0.000000  | 0.000000  | 1.428285  |
| C | -1.555809 | 3.426012  | 3.128997  |
| C | -2.371532 | 3.257487  | 4.237712  |
| C | -2.371532 | 2.040843  | 4.940019  |
| C | -1.555809 | 0.996457  | 4.531565  |
| C | 1.555809  | 4.422578  | -1.402917 |
| C | 2.371532  | 5.298345  | -0.702392 |
| C | 2.371532  | 5.298345  | 0.702392  |
| C | 1.555809  | 4.422578  | 1.402917  |
| C | -1.555809 | 0.996457  | -4.531565 |
| C | -2.371532 | 2.040843  | -4.940019 |
| C | -2.371532 | 3.257487  | -4.237712 |
| C | -1.555809 | 3.426012  | -3.128997 |
| C | 1.555809  | -3.426012 | -3.128997 |
| C | 2.371532  | -3.257487 | -4.237712 |
| C | 2.371532  | -2.040843 | -4.940019 |
| C | 1.555809  | -0.996457 | -4.531565 |



|   |           |           |           |   |           |           |           |
|---|-----------|-----------|-----------|---|-----------|-----------|-----------|
| C | -1.555809 | -4.422578 | 1.402917  | C | 0.000000  | -2.449623 | -1.414289 |
| C | -2.371532 | -5.298345 | 0.702392  | C | -0.707284 | -3.526050 | -0.726722 |
| C | -2.371532 | -5.298345 | -0.702392 | C | -0.707284 | -3.526050 | 0.726722  |
| C | -1.555809 | -4.422578 | -1.402917 | C | 0.000000  | -2.449623 | 1.414289  |
| C | 1.555809  | -0.996457 | 4.531565  | C | 0.707284  | -2.392313 | 2.690241  |
| C | 2.371532  | -2.040843 | 4.940019  | C | 0.707284  | -1.133530 | 3.417063  |
| C | 2.371532  | -3.257487 | 4.237712  | C | 0.000000  | 0.000000  | 2.828353  |
| C | 1.555809  | -3.426012 | 3.128997  | C | -0.707284 | 1.133530  | 3.417063  |
| H | -1.687736 | 4.317568  | 2.519766  | C | -0.707284 | 2.392313  | 2.690241  |
| H | -3.064479 | 4.046524  | 4.518207  | C | 0.000000  | 2.449623  | 1.414289  |
| H | -3.064479 | 1.889061  | 5.763585  | C | 0.000000  | 1.236126  | 0.713630  |
| H | -1.687736 | 0.022887  | 4.998685  | C | 0.000000  | 1.236126  | -0.713630 |
| H | 1.687736  | 4.340592  | -2.479633 | C | 0.000000  | 0.000000  | -1.427240 |
| H | 3.064479  | 5.935917  | -1.245330 | C | 0.000000  | -1.236126 | -0.713630 |
| H | 3.064479  | 5.935917  | 1.245330  | C | 0.000000  | -1.236126 | 0.713630  |
| H | 1.687736  | 4.340592  | 2.479633  | C | 0.000000  | 0.000000  | 1.427240  |
| H | -1.687736 | 0.022887  | -4.998685 | C | -1.653047 | 3.388367  | 3.063883  |
| H | -3.064479 | 1.889061  | -5.763585 | C | -2.515074 | 3.196415  | 4.133221  |
| H | -3.064479 | 4.046524  | -4.518207 | C | -2.515074 | 1.980748  | 4.834944  |
| H | -1.687736 | 4.317568  | -2.519766 | C | -1.653047 | 0.958813  | 4.466397  |
| H | 1.687736  | -4.317568 | -2.519766 | C | 1.653047  | 4.347304  | -1.402829 |
| H | 3.064479  | -4.046524 | -4.518207 | C | 2.515074  | 5.177398  | -0.701821 |
| H | 3.064479  | -1.889061 | -5.763585 | C | 2.515074  | 5.177398  | 0.701821  |
| H | 1.687736  | -0.022887 | -4.998685 | C | 1.653047  | 4.347304  | 1.402829  |
| H | -1.687736 | -4.340592 | 2.479633  | C | -1.653047 | 0.958813  | -4.466397 |
| H | -3.064479 | -5.935917 | 1.245330  | C | -2.515074 | 1.980748  | -4.834944 |
| H | -3.064479 | -5.935917 | -1.245330 | C | -2.515074 | 3.196415  | -4.133221 |
| H | -1.687736 | -4.340592 | -2.479633 | C | -1.653047 | 3.388367  | -3.063883 |
| H | 1.687736  | -0.022887 | 4.998685  | C | 1.653047  | -3.388367 | -3.063883 |
| H | 3.064479  | -1.889061 | 5.763585  | C | 2.515074  | -3.196415 | -4.133221 |
| H | 3.064479  | -4.046524 | 4.518207  | C | 2.515074  | -1.980748 | -4.834944 |
| H | 1.687736  | -4.317568 | 2.519766  | C | 1.653047  | -0.958813 | -4.466397 |

72

cf17, c-HBC\_monomer with bowl depth: 1.65

|   |           |           |           |   |           |           |           |
|---|-----------|-----------|-----------|---|-----------|-----------|-----------|
| C | 0.707284  | 3.526050  | 0.726722  | C | 0.000000  | -2.449623 | -1.414289 |
| C | 0.707284  | 3.526050  | -0.726722 | C | -0.707284 | -3.526050 | -0.726722 |
| C | 0.000000  | 2.449623  | -1.414289 | C | -0.707284 | -3.526050 | 0.726722  |
| C | -0.707284 | 2.392313  | -2.690241 | C | 0.000000  | -2.449623 | 1.414289  |
| C | -0.707284 | 1.133530  | -3.417063 | C | 0.707284  | -2.392313 | 2.690241  |
| C | 0.000000  | 0.000000  | -2.828353 | C | 0.707284  | -1.133530 | 3.417063  |
| C | 0.707284  | -1.133530 | -3.417063 | C | 0.000000  | 0.000000  | 2.828353  |
| C | 0.707284  | -2.392313 | -2.690241 | C | -0.707284 | 1.133530  | 3.417063  |
|   |           |           |           | C | -0.707284 | 2.392313  | 2.690241  |
|   |           |           |           | C | 0.000000  | 2.449623  | 1.414289  |
|   |           |           |           | C | 0.000000  | 1.236126  | 0.713630  |
|   |           |           |           | C | 0.000000  | 1.236126  | -0.713630 |
|   |           |           |           | C | 0.000000  | 0.000000  | -1.427240 |
|   |           |           |           | C | 0.000000  | -1.236126 | -0.713630 |
|   |           |           |           | C | 0.000000  | -1.236126 | 0.713630  |
|   |           |           |           | C | 0.000000  | 0.000000  | 1.427240  |
|   |           |           |           | C | -1.653047 | 3.388367  | 3.063883  |
|   |           |           |           | C | -2.515074 | 3.196415  | 4.133221  |
|   |           |           |           | C | -2.515074 | 1.980748  | 4.834944  |
|   |           |           |           | C | -1.653047 | 0.958813  | 4.466397  |
|   |           |           |           | C | 1.653047  | 4.347304  | -1.402829 |
|   |           |           |           | C | 2.515074  | 5.177398  | -0.701821 |
|   |           |           |           | C | 2.515074  | 5.177398  | 0.701821  |
|   |           |           |           | C | 1.653047  | 4.347304  | 1.402829  |
|   |           |           |           | C | -1.653047 | 0.958813  | -4.466397 |
|   |           |           |           | C | -2.515074 | 1.980748  | -4.834944 |
|   |           |           |           | C | -2.515074 | 3.196415  | -4.133221 |
|   |           |           |           | C | -1.653047 | 3.388367  | -3.063883 |
|   |           |           |           | C | 1.653047  | -3.388367 | -3.063883 |
|   |           |           |           | C | 2.515074  | -3.196415 | -4.133221 |
|   |           |           |           | C | 2.515074  | -1.980748 | -4.834944 |
|   |           |           |           | C | 1.653047  | -0.958813 | -4.466397 |
|   |           |           |           | C | -1.653047 | -4.347304 | 1.402829  |
|   |           |           |           | C | -2.515074 | -5.177398 | 0.701821  |
|   |           |           |           | C | -2.515074 | -5.177398 | -0.701821 |
|   |           |           |           | C | -1.653047 | -4.347304 | -1.402829 |
|   |           |           |           | C | 1.653047  | -0.958813 | 4.466397  |
|   |           |           |           | C | 2.515074  | -1.980748 | 4.834944  |
|   |           |           |           | C | 2.515074  | -3.196415 | 4.133221  |
|   |           |           |           | C | 1.653047  | -3.388367 | 3.063883  |
|   |           |           |           | H | -1.793220 | 4.274053  | 2.447458  |
|   |           |           |           | H | -3.244369 | 3.964696  | 4.376635  |
|   |           |           |           | H | -3.244369 | 1.807178  | 5.621946  |
|   |           |           |           | H | -1.793220 | -0.018112 | 4.924681  |
|   |           |           |           | H | 1.793220  | 4.256227  | -2.478069 |

|   |           |           |           |   |           |           |           |
|---|-----------|-----------|-----------|---|-----------|-----------|-----------|
| H | 3.244369  | 5.772408  | -1.245412 | C | 0.000000  | -1.235025 | -0.713005 |
| H | 3.244369  | 5.772408  | 1.245412  | C | 0.000000  | -1.235025 | 0.713005  |
| H | 1.793220  | 4.256227  | 2.478069  | C | 0.000000  | 0.000000  | 1.426088  |
| H | -1.793220 | -0.018112 | -4.924681 | C | -1.750285 | 3.347062  | 2.992094  |
| H | -3.244369 | 1.807178  | -5.621946 | C | -2.658037 | 3.129327  | 4.017716  |
| H | -3.244369 | 3.964696  | -4.376635 | C | -2.658037 | 1.914795  | 4.718975  |
| H | -1.793220 | 4.274053  | -2.447458 | C | -1.750285 | 0.917733  | 4.394870  |
| H | 1.793220  | -4.274053 | -2.447458 | C | 1.750285  | 4.264732  | -1.402594 |
| H | 3.244369  | -3.964696 | -4.376635 | C | 2.658037  | 5.044185  | -0.701206 |
| H | 3.244369  | -1.807178 | -5.621946 | C | 2.658037  | 5.044185  | 0.701206  |
| H | 1.793220  | 0.018112  | -4.924681 | C | 1.750285  | 4.264732  | 1.402594  |
| H | -1.793220 | -4.256227 | 2.478069  | C | -1.750285 | 0.917733  | -4.394870 |
| H | -3.244369 | -5.772408 | 1.245412  | C | -2.658037 | 1.914795  | -4.718975 |
| H | -3.244369 | -5.772408 | -1.245412 | C | -2.658037 | 3.129327  | -4.017716 |
| H | -1.793220 | -4.256227 | -2.478069 | C | -1.750285 | 3.347062  | -2.992094 |
| H | 1.793220  | 0.018112  | 4.924681  | C | 1.750285  | -3.347062 | -2.992094 |
| H | 3.244369  | -1.807178 | 5.621946  | C | 2.658037  | -3.129327 | -4.017716 |
| H | 3.244369  | -3.964696 | 4.376635  | C | 2.658037  | -1.914795 | -4.718975 |
| H | 1.793220  | -4.274053 | 2.447458  | C | 1.750285  | -0.917733 | -4.394870 |

72

cf18, c-HBC\_monomer with bowl depth: 1.75

|   |           |           |           |   |           |           |           |
|---|-----------|-----------|-----------|---|-----------|-----------|-----------|
| C | 0.752765  | 3.501082  | 0.728644  | C | 1.750285  | -0.917733 | 4.394870  |
| C | 0.752765  | 3.501082  | -0.728644 | C | 2.658037  | -1.914795 | 4.718975  |
| C | 0.000000  | 2.447960  | -1.413350 | C | 2.658037  | -3.129327 | 4.017716  |
| C | -0.752765 | 2.381569  | -2.667681 | C | 1.750285  | -3.347062 | 2.992094  |
| C | -0.752765 | 1.119528  | -3.396516 | H | -1.898704 | 4.226359  | 2.367978  |
| C | 0.000000  | 0.000000  | -2.826541 | H | -3.422397 | 3.874962  | 4.220731  |
| C | 0.752765  | -1.119528 | -3.396516 | H | -3.422397 | 1.717728  | 5.466177  |
| C | 0.752765  | -2.381569 | -2.667681 | H | -1.898704 | -0.062538 | 4.843992  |
| C | 0.000000  | -2.447960 | -1.413350 | H | 1.898704  | 4.163946  | -2.476168 |
| C | -0.752765 | -3.501082 | -0.728644 | H | 3.422397  | 5.592771  | -1.245483 |
| C | -0.752765 | -3.501082 | 0.728644  | H | 3.422397  | 5.592771  | 1.245483  |
| C | 0.000000  | -2.447960 | 1.413350  | H | 1.898704  | 4.163946  | 2.476168  |
| C | 0.752765  | -2.381569 | 2.667681  | H | -1.898704 | -0.062538 | -4.843992 |
| C | 0.752765  | -1.119528 | 3.396516  | H | -3.422397 | 1.717728  | -5.466177 |
| C | 0.000000  | 0.000000  | 2.826541  | H | -3.422397 | 3.874962  | -4.220731 |
| C | -0.752765 | 1.119528  | 3.396516  | H | -1.898704 | 4.226359  | -2.367978 |
| C | -0.752765 | 2.381569  | 2.667681  | H | 1.898704  | -4.226359 | -2.367978 |
| C | 0.000000  | 2.447960  | 1.413350  | H | 3.422397  | -3.874962 | -4.220731 |
| C | 0.000000  | 1.235025  | 0.713005  | H | 3.422397  | -1.717728 | -5.466177 |
| C | 0.000000  | 1.235025  | -0.713005 | H | 1.898704  | 0.062538  | -4.843992 |
| C | 0.000000  | 0.000000  | -1.426088 | H | -1.898704 | -4.163946 | 2.476168  |
|   |           |           |           | H | -3.422397 | -5.592771 | 1.245483  |

|   |           |           |           |
|---|-----------|-----------|-----------|
| H | -3.422397 | -5.592771 | -1.245483 |
| H | -1.898704 | -4.163946 | -2.476168 |
| H | 1.898704  | 0.062538  | 4.843992  |
| H | 3.422397  | -1.717728 | 5.466177  |
| H | 3.422397  | -3.874962 | 4.220731  |
| H | 1.898704  | -4.226359 | 2.367978  |

72

cf19, c-HBC\_monomer with bowl depth: 1.85

|   |           |           |           |
|---|-----------|-----------|-----------|
| C | 0.800475  | 3.474066  | 0.730828  |
| C | 0.800475  | 3.474066  | -0.730828 |
| C | 0.000000  | 2.446588  | -1.412595 |
| C | -0.800475 | 2.370016  | -2.643255 |
| C | -0.800475 | 1.104298  | -3.374397 |
| C | 0.000000  | 0.000000  | -2.825215 |
| C | 0.800475  | -1.104298 | -3.374397 |
| C | 0.800475  | -2.370016 | -2.643255 |
| C | 0.000000  | -2.446588 | -1.412595 |
| C | -0.800475 | -3.474066 | -0.730828 |
| C | -0.800475 | -3.474066 | 0.730828  |
| C | 0.000000  | -2.446588 | 1.412595  |
| C | 0.800475  | -2.370016 | 2.643255  |
| C | 0.800475  | -1.104298 | 3.374397  |
| C | 0.000000  | 0.000000  | 2.825215  |
| C | -0.800475 | 1.104298  | 3.374397  |
| C | -0.800475 | 2.370016  | 2.643255  |
| C | 0.000000  | 2.446588  | 1.412595  |
| C | 0.000000  | 1.234134  | 0.712570  |
| C | 0.000000  | 1.234134  | -0.712570 |
| C | 0.000000  | 0.000000  | -1.425323 |
| C | 0.000000  | -1.234134 | -0.712570 |
| C | 0.000000  | -1.234134 | 0.712570  |
| C | 0.000000  | 0.000000  | 1.425323  |
| C | -1.847523 | 3.302839  | 2.915573  |
| C | -2.797487 | 3.058707  | 3.895940  |
| C | -2.797487 | 1.845568  | 4.596708  |
| C | -1.847523 | 0.874334  | 4.318615  |
| C | 1.847523  | 4.176656  | -1.402166 |
| C | 2.797487  | 4.903568  | -0.700466 |
| C | 2.797487  | 4.903568  | 0.700466  |
| C | 1.847523  | 4.176656  | 1.402166  |
| C | -1.847523 | 0.874334  | -4.318615 |
| C | -2.797487 | 1.845568  | -4.596708 |

|   |           |           |           |
|---|-----------|-----------|-----------|
| C | -2.797487 | 3.058707  | -3.895940 |
| C | -1.847523 | 3.302839  | -2.915573 |
| C | 1.847523  | -3.302839 | -2.915573 |
| C | 2.797487  | -3.058707 | -3.895940 |
| C | 2.797487  | -1.845568 | -4.596708 |
| C | 1.847523  | -0.874334 | -4.318615 |
| C | -1.847523 | -4.176656 | 1.402166  |
| C | -2.797487 | -4.903568 | 0.700466  |
| C | -2.797487 | -4.903568 | -0.700466 |
| C | -1.847523 | -4.176656 | -1.402166 |
| C | 1.847523  | -0.874334 | 4.318615  |
| C | 2.797487  | -1.845568 | 4.596708  |
| C | 2.797487  | -3.058707 | 3.895940  |
| C | 1.847523  | -3.302839 | 2.915573  |
| H | -2.004187 | 4.176071  | 2.284404  |
| H | -3.593216 | 3.781412  | 4.057410  |
| H | -3.593216 | 1.624338  | 5.303387  |
| H | -2.004187 | -0.108782 | 4.759505  |
| H | 2.004187  | 4.066741  | -2.474038 |
| H | 3.593216  | 5.404700  | -1.245628 |
| H | 3.593216  | 5.404700  | 1.245628  |
| H | 2.004187  | 4.066741  | 2.474038  |
| H | -2.004187 | -0.108782 | -4.759505 |
| H | -3.593216 | 1.624338  | -5.303387 |
| H | -3.593216 | 3.781412  | -4.057410 |
| H | -2.004187 | 4.176071  | -2.284404 |
| H | 2.004187  | -4.176071 | -2.284404 |
| H | 3.593216  | -3.781412 | -4.057410 |
| H | 3.593216  | -1.624338 | -5.303387 |
| H | 2.004187  | 0.108782  | -4.759505 |
| H | -2.004187 | -4.066741 | 2.474038  |
| H | -3.593216 | -5.404700 | 1.245628  |
| H | -3.593216 | -5.404700 | -1.245628 |
| H | -2.004187 | -4.066741 | -2.474038 |
| H | 2.004187  | 0.108782  | 4.759505  |
| H | 3.593216  | -1.624338 | 5.303387  |
| H | 3.593216  | -3.781412 | 4.057410  |
| H | 2.004187  | -4.176071 | 2.284404  |

144

cf0, c-HBC\_homodimers with bowl depth: 0.00

|   |          |          |          |
|---|----------|----------|----------|
| C | 3.663591 | 1.286711 | 1.810000 |
| C | 2.946321 | 2.529267 | 1.810000 |

|   |           |           |          |   |           |           |           |
|---|-----------|-----------|----------|---|-----------|-----------|-----------|
| C | 1.469931  | 2.545652  | 1.810000 | C | -1.307584 | -5.122138 | 1.810000  |
| C | 0.717379  | 3.815788  | 1.810000 | H | 5.742349  | -0.608006 | 1.810000  |
| C | -0.717379 | 3.815788  | 1.810000 | H | 6.926079  | -2.507847 | 1.810000  |
| C | -1.469931 | 2.545652  | 1.810000 | H | 5.635229  | -4.743987 | 1.810000  |
| C | -2.946321 | 2.529267  | 1.810000 | H | 3.397371  | -4.668578 | 1.810000  |
| C | -3.663591 | 1.286711  | 1.810000 | H | 3.397371  | 4.668578  | 1.810000  |
| C | -2.939776 | 0.000000  | 1.810000 | H | 5.635229  | 4.743987  | 1.810000  |
| C | -3.663591 | -1.286711 | 1.810000 | H | 6.926079  | 2.507847  | 1.810000  |
| C | -2.946321 | -2.529267 | 1.810000 | H | 5.742349  | 0.608006  | 1.810000  |
| C | -1.469931 | -2.545652 | 1.810000 | H | -2.344489 | 5.276702  | 1.810000  |
| C | -0.717379 | -3.815788 | 1.810000 | H | -1.291014 | 7.251868  | 1.810000  |
| C | 0.717379  | -3.815788 | 1.810000 | H | 1.291014  | 7.251868  | 1.810000  |
| C | 1.469931  | -2.545652 | 1.810000 | H | 2.344489  | 5.276702  | 1.810000  |
| C | 2.946321  | -2.529267 | 1.810000 | H | -5.742349 | 0.608006  | 1.810000  |
| C | 3.663591  | -1.286711 | 1.810000 | H | -6.926079 | 2.507847  | 1.810000  |
| C | 2.939776  | 0.000000  | 1.810000 | H | -5.635229 | 4.743987  | 1.810000  |
| C | 1.491907  | 0.000000  | 1.810000 | H | -3.397371 | 4.668578  | 1.810000  |
| C | 0.745960  | 1.291875  | 1.810000 | H | -3.397371 | -4.668578 | 1.810000  |
| C | -0.745960 | 1.291875  | 1.810000 | H | -5.635229 | -4.743987 | 1.810000  |
| C | -1.491907 | 0.000000  | 1.810000 | H | -6.926079 | -2.507847 | 1.810000  |
| C | -0.745960 | -1.291875 | 1.810000 | H | -5.742349 | -0.608006 | 1.810000  |
| C | 0.745960  | -1.291875 | 1.810000 | H | 2.344489  | -5.276702 | 1.810000  |
| C | 5.090061  | -1.428620 | 1.810000 | H | 1.291014  | -7.251868 | 1.810000  |
| C | 5.841540  | -2.576524 | 1.810000 | H | -1.291014 | -7.251868 | 1.810000  |
| C | 5.152301  | -3.770468 | 1.810000 | H | -2.344489 | -5.276702 | 1.810000  |
| C | 3.782439  | -3.693653 | 1.810000 | C | 3.663591  | 1.286711  | -1.810000 |
| C | 3.782439  | 3.693653  | 1.810000 | C | 2.946321  | 2.529267  | -1.810000 |
| C | 5.152301  | 3.770468  | 1.810000 | C | 1.469931  | 2.545652  | -1.810000 |
| C | 5.841540  | 2.576524  | 1.810000 | C | 0.717379  | 3.815788  | -1.810000 |
| C | 5.090061  | 1.428620  | 1.810000 | C | -0.717379 | 3.815788  | -1.810000 |
| C | -1.307584 | 5.122138  | 1.810000 | C | -1.469931 | 2.545652  | -1.810000 |
| C | -0.689314 | 6.346950  | 1.810000 | C | -2.946321 | 2.529267  | -1.810000 |
| C | 0.689314  | 6.346950  | 1.810000 | C | -3.663591 | 1.286711  | -1.810000 |
| C | 1.307584  | 5.122138  | 1.810000 | C | -2.939776 | 0.000000  | -1.810000 |
| C | -5.090061 | 1.428620  | 1.810000 | C | -3.663591 | -1.286711 | -1.810000 |
| C | -5.841540 | 2.576524  | 1.810000 | C | -2.946321 | -2.529267 | -1.810000 |
| C | -5.152301 | 3.770468  | 1.810000 | C | -1.469931 | -2.545652 | -1.810000 |
| C | -3.782439 | 3.693653  | 1.810000 | C | -0.717379 | -3.815788 | -1.810000 |
| C | -3.782439 | -3.693653 | 1.810000 | C | 0.717379  | -3.815788 | -1.810000 |
| C | -5.152301 | -3.770468 | 1.810000 | C | 1.469931  | -2.545652 | -1.810000 |
| C | -5.841540 | -2.576524 | 1.810000 | C | 2.946321  | -2.529267 | -1.810000 |
| C | -5.090061 | -1.428620 | 1.810000 | C | 3.663591  | -1.286711 | -1.810000 |
| C | 1.307584  | -5.122138 | 1.810000 | C | 2.939776  | 0.000000  | -1.810000 |
| C | 0.689314  | -6.346950 | 1.810000 | C | 1.491907  | 0.000000  | -1.810000 |
| C | -0.689314 | -6.346950 | 1.810000 | C | 0.745960  | 1.291875  | -1.810000 |

|   |           |           |           |
|---|-----------|-----------|-----------|
| C | -0.745960 | 1.291875  | -1.810000 |
| C | -1.491907 | 0.000000  | -1.810000 |
| C | -0.745960 | -1.291875 | -1.810000 |
| C | 0.745960  | -1.291875 | -1.810000 |
| C | 5.090061  | -1.428620 | -1.810000 |
| C | 5.841540  | -2.576524 | -1.810000 |
| C | 5.152301  | -3.770468 | -1.810000 |
| C | 3.782439  | -3.693653 | -1.810000 |
| C | 3.782439  | 3.693653  | -1.810000 |
| C | 5.152301  | 3.770468  | -1.810000 |
| C | 5.841540  | 2.576524  | -1.810000 |
| C | 5.090061  | 1.428620  | -1.810000 |
| C | -1.307584 | 5.122138  | -1.810000 |
| C | -0.689314 | 6.346950  | -1.810000 |
| C | 0.689314  | 6.346950  | -1.810000 |
| C | 1.307584  | 5.122138  | -1.810000 |
| C | -5.090061 | 1.428620  | -1.810000 |
| C | -5.841540 | 2.576524  | -1.810000 |
| C | -5.152301 | 3.770468  | -1.810000 |
| C | -3.782439 | 3.693653  | -1.810000 |
| C | -3.782439 | -3.693653 | -1.810000 |
| C | -5.152301 | -3.770468 | -1.810000 |
| C | -5.841540 | -2.576524 | -1.810000 |
| C | -5.090061 | -1.428620 | -1.810000 |
| C | 1.307584  | -5.122138 | -1.810000 |
| C | 0.689314  | -6.346950 | -1.810000 |
| C | -0.689314 | -6.346950 | -1.810000 |
| C | -1.307584 | -5.122138 | -1.810000 |
| H | 5.742349  | -0.608006 | -1.810000 |
| H | 6.926079  | -2.507847 | -1.810000 |
| H | 5.635229  | -4.743987 | -1.810000 |
| H | 3.397371  | -4.668578 | -1.810000 |
| H | 3.397371  | 4.668578  | -1.810000 |
| H | 5.635229  | 4.743987  | -1.810000 |
| H | 6.926079  | 2.507847  | -1.810000 |
| H | 5.742349  | 0.608006  | -1.810000 |
| H | -2.344489 | 5.276702  | -1.810000 |
| H | -1.291014 | 7.251868  | -1.810000 |
| H | 1.291014  | 7.251868  | -1.810000 |
| H | 2.344489  | 5.276702  | -1.810000 |
| H | -5.742349 | 0.608006  | -1.810000 |
| H | -6.926079 | 2.507847  | -1.810000 |
| H | -5.635229 | 4.743987  | -1.810000 |
| H | -3.397371 | 4.668578  | -1.810000 |
| H | -3.397371 | -4.668578 | -1.810000 |

|   |           |           |           |
|---|-----------|-----------|-----------|
| H | -5.635229 | -4.743987 | -1.810000 |
| H | -6.926079 | -2.507847 | -1.810000 |
| H | -5.742349 | -0.608006 | -1.810000 |
| H | 2.344489  | -5.276702 | -1.810000 |
| H | 1.291014  | -7.251868 | -1.810000 |
| H | -1.291014 | -7.251868 | -1.810000 |
| H | -2.344489 | -5.276702 | -1.810000 |

144  
cfl, c-HBC\_homodimers with bowl depth: 0.10

|   |          |           |           |
|---|----------|-----------|-----------|
| C | 1.854317 | 3.812762  | 0.717191  |
| C | 1.854317 | 3.812762  | -0.717191 |
| C | 1.810000 | 2.543960  | -1.469049 |
| C | 1.765683 | 2.527769  | -2.944025 |
| C | 1.765683 | 1.285508  | -3.661130 |
| C | 1.810000 | 0.000000  | -2.937894 |
| C | 1.854317 | -1.285508 | -3.661130 |
| C | 1.854317 | -2.527769 | -2.944025 |
| C | 1.810000 | -2.543960 | -1.469049 |
| C | 1.765683 | -3.812762 | -0.717191 |
| C | 1.765683 | -3.812762 | 0.717191  |
| C | 1.810000 | -2.543960 | 1.469049  |
| C | 1.854317 | -2.527769 | 2.944025  |
| C | 1.854317 | -1.285508 | 3.661130  |
| C | 1.810000 | 0.000000  | 2.937894  |
| C | 1.765683 | 1.285508  | 3.661130  |
| C | 1.765683 | 2.527769  | 2.944025  |
| C | 1.810000 | 2.543960  | 1.469049  |
| C | 1.810000 | 1.290885  | 0.745455  |
| C | 1.810000 | 1.290885  | -0.745455 |
| C | 1.810000 | 0.000000  | -1.491036 |
| C | 1.810000 | -1.290885 | -0.745455 |
| C | 1.810000 | -1.290885 | 0.745455  |
| C | 1.810000 | 0.000000  | 1.491036  |
| C | 1.712762 | 3.692412  | 3.777614  |
| C | 1.667115 | 3.767538  | 5.146909  |
| C | 1.667115 | 2.573063  | 5.836438  |
| C | 1.712762 | 1.425002  | 5.086435  |
| C | 1.907238 | 5.116866  | -1.308871 |
| C | 1.952885 | 6.340437  | -0.689624 |
| C | 1.952885 | 6.340437  | 0.689624  |
| C | 1.907238 | 5.116866  | 1.308871  |
| C | 1.712762 | 1.425002  | -5.086435 |

|   |           |           |           |   |           |           |           |
|---|-----------|-----------|-----------|---|-----------|-----------|-----------|
| C | 1.667115  | 2.573063  | -5.836438 | C | -1.765683 | -1.285508 | -3.661130 |
| C | 1.667115  | 3.767538  | -5.146909 | C | -1.765683 | -2.527769 | -2.944025 |
| C | 1.712762  | 3.692412  | -3.777614 | C | -1.810000 | -2.543960 | -1.469049 |
| C | 1.907238  | -3.692412 | -3.777614 | C | -1.854317 | -3.812762 | -0.717191 |
| C | 1.952885  | -3.767538 | -5.146909 | C | -1.854317 | -3.812762 | 0.717191  |
| C | 1.952885  | -2.573063 | -5.836438 | C | -1.810000 | -2.543960 | 1.469049  |
| C | 1.907238  | -1.425002 | -5.086435 | C | -1.765683 | -2.527769 | 2.944025  |
| C | 1.712762  | -5.116866 | 1.308871  | C | -1.765683 | -1.285508 | 3.661130  |
| C | 1.667115  | -6.340437 | 0.689624  | C | -1.810000 | 0.000000  | 2.937894  |
| C | 1.667115  | -6.340437 | -0.689624 | C | -1.854317 | 1.285508  | 3.661130  |
| C | 1.712762  | -5.116866 | -1.308871 | C | -1.854317 | 2.527769  | 2.944025  |
| C | 1.907238  | -1.425002 | 5.086435  | C | -1.810000 | 2.543960  | 1.469049  |
| C | 1.952885  | -2.573063 | 5.836438  | C | -1.810000 | 1.290885  | 0.745455  |
| C | 1.952885  | -3.767538 | 5.146909  | C | -1.810000 | 1.290885  | -0.745455 |
| C | 1.907238  | -3.692412 | 3.777614  | C | -1.810000 | 0.000000  | -1.491036 |
| H | 1.704516  | 4.666300  | 3.388263  | C | -1.810000 | -1.290885 | -0.745455 |
| H | 1.628613  | 4.740352  | 5.629678  | C | -1.810000 | -1.290885 | 0.745455  |
| H | 1.628613  | 2.504433  | 6.920279  | C | -1.810000 | 0.000000  | 1.491036  |
| H | 1.704516  | 0.600947  | 5.735235  | C | -1.907238 | 3.692412  | 3.777614  |
| H | 1.915484  | 5.266523  | -2.346995 | C | -1.952885 | 3.767538  | 5.146909  |
| H | 1.991387  | 7.244810  | -1.290914 | C | -1.952885 | 2.573063  | 5.836438  |
| H | 1.991387  | 7.244810  | 1.290914  | C | -1.907238 | 1.425002  | 5.086435  |
| H | 1.915484  | 5.266523  | 2.346995  | C | -1.712762 | 5.116866  | -1.308871 |
| H | 1.704516  | 0.600947  | -5.735235 | C | -1.667115 | 6.340437  | -0.689624 |
| H | 1.628613  | 2.504433  | -6.920279 | C | -1.667115 | 6.340437  | 0.689624  |
| H | 1.628613  | 4.740352  | -5.629678 | C | -1.712762 | 5.116866  | 1.308871  |
| H | 1.704516  | 4.666300  | -3.388263 | C | -1.907238 | 1.425002  | -5.086435 |
| H | 1.915484  | -4.666300 | -3.388263 | C | -1.952885 | 2.573063  | -5.836438 |
| H | 1.991387  | -4.740352 | -5.629678 | C | -1.952885 | 3.767538  | -5.146909 |
| H | 1.991387  | -2.504433 | -6.920279 | C | -1.907238 | 3.692412  | -3.777614 |
| H | 1.915484  | -0.600947 | -5.735235 | C | -1.712762 | -3.692412 | -3.777614 |
| H | 1.704516  | -5.266523 | 2.346995  | C | -1.667115 | -3.767538 | -5.146909 |
| H | 1.628613  | -7.244810 | 1.290914  | C | -1.667115 | -2.573063 | -5.836438 |
| H | 1.628613  | -7.244810 | -1.290914 | C | -1.712762 | -1.425002 | -5.086435 |
| H | 1.704516  | -5.266523 | -2.346995 | C | -1.907238 | -5.116866 | 1.308871  |
| H | 1.915484  | -0.600947 | 5.735235  | C | -1.952885 | -6.340437 | 0.689624  |
| H | 1.991387  | -2.504433 | 6.920279  | C | -1.952885 | -6.340437 | -0.689624 |
| H | 1.991387  | -4.740352 | 5.629678  | C | -1.907238 | -5.116866 | -1.308871 |
| H | 1.915484  | -4.666300 | 3.388263  | C | -1.712762 | -1.425002 | 5.086435  |
| C | -1.765683 | 3.812762  | 0.717191  | C | -1.667115 | -2.573063 | 5.836438  |
| C | -1.765683 | 3.812762  | -0.717191 | C | -1.667115 | -3.767538 | 5.146909  |
| C | -1.810000 | 2.543960  | -1.469049 | C | -1.712762 | -3.692412 | 3.777614  |
| C | -1.854317 | 2.527769  | -2.944025 | H | -1.915484 | 4.666300  | 3.388263  |
| C | -1.854317 | 1.285508  | -3.661130 | H | -1.991387 | 4.740352  | 5.629678  |
| C | -1.810000 | 0.000000  | -2.937894 | H | -1.991387 | 2.504433  | 6.920279  |

|   |           |           |           |   |          |           |           |
|---|-----------|-----------|-----------|---|----------|-----------|-----------|
| H | -1.915484 | 0.600947  | 5.735235  | C | 1.810000 | 1.287984  | -0.743711 |
| H | -1.704516 | 5.266523  | -2.346995 | C | 1.810000 | 0.000000  | -1.487627 |
| H | -1.628613 | 7.244810  | -1.290914 | C | 1.810000 | -1.287984 | -0.743711 |
| H | -1.628613 | 7.244810  | 1.290914  | C | 1.810000 | -1.287984 | 0.743711  |
| H | -1.704516 | 5.266523  | 2.346995  | C | 1.810000 | 0.000000  | 1.487627  |
| H | -1.915484 | 0.600947  | -5.735235 | C | 1.615524 | 3.688687  | 3.761851  |
| H | -1.991387 | 2.504433  | -6.920279 | C | 1.524858 | 3.759350  | 5.129406  |
| H | -1.991387 | 4.740352  | -5.629678 | C | 1.524858 | 2.563659  | 5.820088  |
| H | -1.915484 | 4.666300  | -3.388263 | C | 1.615524 | 1.414202  | 5.075651  |
| H | -1.704516 | -4.666300 | -3.388263 | C | 2.004476 | 5.102401  | -1.313098 |
| H | -1.628613 | -4.740352 | -5.629678 | C | 2.095142 | 6.322043  | -0.690405 |
| H | -1.628613 | -2.504433 | -6.920279 | C | 2.095142 | 6.322043  | 0.690405  |
| H | -1.704516 | -0.600947 | -5.735235 | C | 2.004476 | 5.102401  | 1.313098  |
| H | -1.915484 | -5.266523 | 2.346995  | C | 1.615524 | 1.414202  | -5.075651 |
| H | -1.991387 | -7.244810 | 1.290914  | C | 1.524858 | 2.563659  | -5.820088 |
| H | -1.991387 | -7.244810 | -1.290914 | C | 1.524858 | 3.759350  | -5.129406 |
| H | -1.915484 | -5.266523 | -2.346995 | C | 1.615524 | 3.688687  | -3.761851 |
| H | -1.704516 | -0.600947 | 5.735235  | C | 2.004476 | -3.688687 | -3.761851 |
| H | -1.628613 | -2.504433 | 6.920279  | C | 2.095142 | -3.759350 | -5.129406 |
| H | -1.628613 | -4.740352 | 5.629678  | C | 2.095142 | -2.563659 | -5.820088 |
| H | -1.704516 | -4.666300 | 3.388263  | C | 2.004476 | -1.414202 | -5.075651 |

144

cf2, c-HBC\_homodimers with bowl depth: 0.19

|   |          |           |           |   |          |           |           |
|---|----------|-----------|-----------|---|----------|-----------|-----------|
| C | 1.898046 | 3.804764  | 0.716832  | C | 1.615524 | -5.102401 | 1.313098  |
| C | 1.898046 | 3.804764  | -0.716832 | C | 1.524858 | -6.322043 | 0.690405  |
| C | 1.810000 | 2.539183  | -1.466095 | C | 1.615524 | -5.102401 | -1.313098 |
| C | 1.721954 | 2.523187  | -2.936748 | C | 2.004476 | -1.414202 | 5.075651  |
| C | 1.721954 | 1.281740  | -3.653706 | C | 2.095142 | -2.563659 | 5.820088  |
| C | 1.810000 | 0.000000  | -2.932316 | C | 2.095142 | -3.759350 | 5.129406  |
| C | 1.898046 | -1.281740 | -3.653706 | C | 2.004476 | -3.688687 | 3.761851  |
| C | 1.898046 | -2.523187 | -2.936748 | H | 1.599033 | 4.659095  | 3.359605  |
| C | 1.810000 | -2.539183 | -1.466095 | H | 1.447000 | 4.729704  | 5.612263  |
| C | 1.721954 | -3.804764 | -0.716832 | H | 1.447000 | 2.497286  | 6.901899  |
| C | 1.721954 | -3.804764 | 0.716832  | H | 1.599033 | 0.581194  | 5.715738  |
| C | 1.810000 | -2.539183 | 1.466095  | H | 2.020967 | 5.240562  | -2.354562 |
| C | 1.898046 | -2.523187 | 2.936748  | H | 2.173000 | 7.225508  | -1.289164 |
| C | 1.898046 | -1.281740 | 3.653706  | H | 2.173000 | 7.225508  | 1.289164  |
| C | 1.810000 | 0.000000  | 2.932316  | H | 2.020967 | 5.240562  | 2.354562  |
| C | 1.721954 | 1.281740  | 3.653706  | H | 1.599033 | 0.581194  | -5.715738 |
| C | 1.721954 | 2.523187  | 2.936748  | H | 1.447000 | 2.497286  | -6.901899 |
| C | 1.810000 | 2.539183  | 1.466095  | H | 1.447000 | 4.729704  | -5.612263 |
| C | 1.898046 | 1.287984  | 0.743711  | H | 1.599033 | 4.659095  | -3.359605 |
|   |          |           |           | H | 2.020967 | -4.659095 | -3.359605 |
|   |          |           |           | H | 2.173000 | -4.729704 | -5.612263 |
|   |          |           |           | H | 2.173000 | -2.497286 | -6.901899 |
|   |          |           |           | H | 2.020967 | -0.581194 | -5.715738 |

|   |           |           |           |
|---|-----------|-----------|-----------|
| H | 1.599033  | -5.240562 | 2.354562  |
| H | 1.447000  | -7.225508 | 1.289164  |
| H | 1.447000  | -7.225508 | -1.289164 |
| H | 1.599033  | -5.240562 | -2.354562 |
| H | 2.020967  | -0.581194 | 5.715738  |
| H | 2.173000  | -2.497286 | 6.901899  |
| H | 2.173000  | -4.729704 | 5.612263  |
| H | 2.020967  | -4.659095 | 3.359605  |
| C | -1.721954 | 3.804764  | 0.716832  |
| C | -1.721954 | 3.804764  | -0.716832 |
| C | -1.810000 | 2.539183  | -1.466095 |
| C | -1.898046 | 2.523187  | -2.936748 |
| C | -1.898046 | 1.281740  | -3.653706 |
| C | -1.810000 | 0.000000  | -2.932316 |
| C | -1.721954 | -1.281740 | -3.653706 |
| C | -1.721954 | -2.523187 | -2.936748 |
| C | -1.810000 | -2.539183 | -1.466095 |
| C | -1.898046 | -3.804764 | -0.716832 |
| C | -1.898046 | -3.804764 | 0.716832  |
| C | -1.810000 | -2.539183 | 1.466095  |
| C | -1.721954 | -2.523187 | 2.936748  |
| C | -1.721954 | -1.281740 | 3.653706  |
| C | -1.810000 | 0.000000  | 2.932316  |
| C | -1.898046 | 1.281740  | 3.653706  |
| C | -1.898046 | 2.523187  | 2.936748  |
| C | -1.810000 | 2.539183  | 1.466095  |
| C | -1.810000 | 1.287984  | 0.743711  |
| C | -1.810000 | 1.287984  | -0.743711 |
| C | -1.810000 | 0.000000  | -1.487627 |
| C | -1.810000 | -1.287984 | -0.743711 |
| C | -1.810000 | -1.287984 | 0.743711  |
| C | -1.810000 | 0.000000  | 1.487627  |
| C | -2.004476 | 3.688687  | 3.761851  |
| C | -2.095142 | 3.759350  | 5.129406  |
| C | -2.095142 | 2.563659  | 5.820088  |
| C | -2.004476 | 1.414202  | 5.075651  |
| C | -1.615524 | 5.102401  | -1.313098 |
| C | -1.524858 | 6.322043  | -0.690405 |
| C | -1.524858 | 6.322043  | 0.690405  |
| C | -1.615524 | 5.102401  | 1.313098  |
| C | -2.004476 | 1.414202  | -5.075651 |
| C | -2.095142 | 2.563659  | -5.820088 |
| C | -2.095142 | 3.759350  | -5.129406 |
| C | -2.004476 | 3.688687  | -3.761851 |
| C | -1.615524 | -3.688687 | -3.761851 |

|   |           |           |           |
|---|-----------|-----------|-----------|
| C | -1.524858 | -3.759350 | -5.129406 |
| C | -1.524858 | -2.563659 | -5.820088 |
| C | -1.615524 | -1.414202 | -5.075651 |
| C | -2.004476 | -5.102401 | 1.313098  |
| C | -2.095142 | -6.322043 | 0.690405  |
| C | -2.095142 | -6.322043 | -0.690405 |
| C | -2.004476 | -5.102401 | -1.313098 |
| C | -1.615524 | -1.414202 | 5.075651  |
| C | -1.524858 | -2.563659 | 5.820088  |
| C | -1.524858 | -3.759350 | 5.129406  |
| C | -1.615524 | -3.688687 | 3.761851  |
| H | -2.020967 | 4.659095  | 3.359605  |
| H | -2.173000 | 4.729704  | 5.612263  |
| H | -2.173000 | 2.497286  | 6.901899  |
| H | -2.020967 | 0.581194  | 5.715738  |
| H | -1.599033 | 5.240562  | -2.354562 |
| H | -1.447000 | 7.225508  | -1.289164 |
| H | -1.447000 | 7.225508  | 1.289164  |
| H | -1.599033 | 5.240562  | 2.354562  |
| H | -2.020967 | 0.581194  | -5.715738 |
| H | -2.173000 | 2.497286  | -6.901899 |
| H | -2.173000 | 4.729704  | -5.612263 |
| H | -2.020967 | 4.659095  | -3.359605 |
| H | -1.599033 | -4.659095 | -3.359605 |
| H | -1.447000 | -4.729704 | -5.612263 |
| H | -1.447000 | -2.497286 | -6.901899 |
| H | -1.599033 | -0.581194 | -5.715738 |
| H | -2.020967 | -5.240562 | 2.354562  |
| H | -2.173000 | -7.225508 | 1.289164  |
| H | -2.173000 | -7.225508 | -1.289164 |
| H | -2.020967 | -5.240562 | -2.354562 |
| H | -1.599033 | -0.581194 | 5.715738  |
| H | -1.447000 | -2.497286 | 6.901899  |
| H | -1.447000 | -4.729704 | 5.612263  |
| H | -1.599033 | -4.659095 | 3.359605  |

144

cf3, c-HBC\_homodimers with bowl depth: 0.29

|   |          |          |           |
|---|----------|----------|-----------|
| C | 1.941423 | 3.792003 | 0.716393  |
| C | 1.941423 | 3.792003 | -0.716393 |
| C | 1.810000 | 2.531851 | -1.462011 |
| C | 1.678577 | 2.516662 | -2.926378 |
| C | 1.678577 | 1.275907 | -3.642678 |



|   |          |           |           |   |           |           |           |
|---|----------|-----------|-----------|---|-----------|-----------|-----------|
| C | 1.810000 | 0.000000  | -2.923844 | H | 1.261381  | 2.483352  | 6.873207  |
| C | 1.941423 | -1.275907 | -3.642678 | H | 1.493549  | 0.548514  | 5.684672  |
| C | 1.941423 | -2.516662 | -2.926378 | H | 2.126451  | 5.196754  | -2.367565 |
| C | 1.810000 | -2.531851 | -1.462011 | H | 2.358619  | 7.193567  | -1.285493 |
| C | 1.678577 | -3.792003 | -0.716393 | H | 2.358619  | 7.193567  | 1.285493  |
| C | 1.678577 | -3.792003 | 0.716393  | H | 2.126451  | 5.196754  | 2.367565  |
| C | 1.810000 | -2.531851 | 1.462011  | H | 1.493549  | 0.548514  | -5.684672 |
| C | 1.941423 | -2.516662 | 2.926378  | H | 1.261381  | 2.483352  | -6.873207 |
| C | 1.941423 | -1.275907 | 3.642678  | H | 1.261381  | 4.709998  | -5.588080 |
| C | 1.810000 | 0.000000  | 2.923844  | H | 1.493549  | 4.648962  | -3.317113 |
| C | 1.678577 | 1.275907  | 3.642678  | H | 2.126451  | -4.648962 | -3.317113 |
| C | 1.678577 | 2.516662  | 2.926378  | H | 2.358619  | -4.709998 | -5.588080 |
| C | 1.810000 | 2.531851  | 1.462011  | H | 2.358619  | -2.483352 | -6.873207 |
| C | 1.810000 | 1.283720  | 0.741290  | H | 2.126451  | -0.548514 | -5.684672 |
| C | 1.810000 | 1.283720  | -0.741290 | H | 1.493549  | -5.196754 | 2.367565  |
| C | 1.810000 | 0.000000  | -1.482703 | H | 1.261381  | -7.193567 | 1.285493  |
| C | 1.810000 | -1.283720 | -0.741290 | H | 1.261381  | -7.193567 | -1.285493 |
| C | 1.810000 | -1.283720 | 0.741290  | H | 1.493549  | -5.196754 | -2.367565 |
| C | 1.810000 | 0.000000  | 1.482703  | H | 2.126451  | -0.548514 | 5.684672  |
| C | 1.518286 | 3.683373  | 3.738481  | H | 2.358619  | -2.483352 | 6.873207  |
| C | 1.380612 | 3.744854  | 5.103316  | H | 2.358619  | -4.709998 | 5.588080  |
| C | 1.380612 | 2.546770  | 5.795005  | H | 2.126451  | -4.648962 | 3.317113  |
| C | 1.518286 | 1.395847  | 5.058937  | C | -1.678577 | 3.792003  | 0.716393  |
| C | 2.101714 | 5.078515  | -1.320689 | C | -1.678577 | 3.792003  | -0.716393 |
| C | 2.239388 | 6.291295  | -0.691735 | C | -1.810000 | 2.531851  | -1.462011 |
| C | 2.239388 | 6.291295  | 0.691735  | C | -1.941423 | 2.516662  | -2.926378 |
| C | 2.101714 | 5.078515  | 1.320689  | C | -1.941423 | 1.275907  | -3.642678 |
| C | 1.518286 | 1.395847  | -5.058937 | C | -1.810000 | 0.000000  | -2.923844 |
| C | 1.380612 | 2.546770  | -5.795005 | C | -1.678577 | -1.275907 | -3.642678 |
| C | 1.380612 | 3.744854  | -5.103316 | C | -1.678577 | -2.516662 | -2.926378 |
| C | 1.518286 | 3.683373  | -3.738481 | C | -1.810000 | -2.531851 | -1.462011 |
| C | 2.101714 | -3.683373 | -3.738481 | C | -1.941423 | -3.792003 | -0.716393 |
| C | 2.239388 | -3.744854 | -5.103316 | C | -1.941423 | -3.792003 | 0.716393  |
| C | 2.239388 | -2.546770 | -5.795005 | C | -1.810000 | -2.531851 | 1.462011  |
| C | 2.101714 | -1.395847 | -5.058937 | C | -1.678577 | -2.516662 | 2.926378  |
| C | 1.518286 | -5.078515 | 1.320689  | C | -1.678577 | -1.275907 | 3.642678  |
| C | 1.380612 | -6.291295 | 0.691735  | C | -1.810000 | 0.000000  | 2.923844  |
| C | 1.380612 | -6.291295 | -0.691735 | C | -1.941423 | 1.275907  | 3.642678  |
| C | 1.518286 | -5.078515 | -1.320689 | C | -1.941423 | 2.516662  | 2.926378  |
| C | 2.101714 | -1.395847 | 5.058937  | C | -1.810000 | 2.531851  | 1.462011  |
| C | 2.239388 | -2.546770 | 5.795005  | C | -1.810000 | 1.283720  | 0.741290  |
| C | 2.239388 | -3.744854 | 5.103316  | C | -1.810000 | 1.283720  | -0.741290 |
| C | 2.101714 | -3.683373 | 3.738481  | C | -1.810000 | 0.000000  | -1.482703 |
| H | 1.493549 | 4.648962  | 3.317113  | C | -1.810000 | -1.283720 | -0.741290 |
| H | 1.261381 | 4.709998  | 5.588080  | C | -1.810000 | -1.283720 | 0.741290  |

|   |           |           |           |                                             |           |           |           |
|---|-----------|-----------|-----------|---------------------------------------------|-----------|-----------|-----------|
| C | -1.810000 | 0.000000  | 1.482703  | H                                           | -1.493549 | -0.548514 | 5.684672  |
| C | -2.101714 | 3.683373  | 3.738481  | H                                           | -1.261381 | -2.483352 | 6.873207  |
| C | -2.239388 | 3.744854  | 5.103316  | H                                           | -1.261381 | -4.709998 | 5.588080  |
| C | -2.239388 | 2.546770  | 5.795005  | H                                           | -1.493549 | -4.648962 | 3.317113  |
| C | -2.101714 | 1.395847  | 5.058937  |                                             |           |           |           |
| C | -1.518286 | 5.078515  | -1.320689 |                                             |           |           |           |
| C | -1.380612 | 6.291295  | -0.691735 |                                             |           |           |           |
| C | -1.380612 | 6.291295  | 0.691735  | 144                                         |           |           |           |
| C | -1.518286 | 5.078515  | 1.320689  | cf4, c-HBC_homodimers with bowl depth: 0.39 |           |           |           |
| C | -2.101714 | 1.395847  | -5.058937 | C                                           | 1.979607  | 3.774941  | 0.715820  |
| C | -2.239388 | 2.546770  | -5.795005 | C                                           | 1.979607  | 3.774941  | -0.715820 |
| C | -2.239388 | 3.744854  | -5.103316 | C                                           | 1.805000  | 2.521952  | -1.456200 |
| C | -2.101714 | 3.683373  | -3.738481 | C                                           | 1.630393  | 2.507550  | -2.911699 |
| C | -1.518286 | -3.683373 | -3.738481 | C                                           | 1.630393  | 1.267834  | -3.627567 |
| C | -1.380612 | -3.744854 | -5.103316 | C                                           | 1.805000  | 0.000000  | -2.912336 |
| C | -1.380612 | -2.546770 | -5.795005 | C                                           | 1.979607  | -1.267834 | -3.627567 |
| C | -1.518286 | -1.395847 | -5.058937 | C                                           | 1.979607  | -2.507550 | -2.911699 |
| C | -2.101714 | -5.078515 | 1.320689  | C                                           | 1.805000  | -2.521952 | -1.456200 |
| C | -2.239388 | -6.291295 | 0.691735  | C                                           | 1.630393  | -3.774941 | -0.715820 |
| C | -2.239388 | -6.291295 | -0.691735 | C                                           | 1.630393  | -3.774941 | 0.715820  |
| C | -2.101714 | -5.078515 | -1.320689 | C                                           | 1.805000  | -2.521952 | 1.456200  |
| C | -1.518286 | -1.395847 | 5.058937  | C                                           | 1.979607  | -2.507550 | 2.911699  |
| C | -1.380612 | -2.546770 | 5.795005  | C                                           | 1.979607  | -1.267834 | 3.627567  |
| C | -1.380612 | -3.744854 | 5.103316  | C                                           | 1.805000  | 0.000000  | 2.912336  |
| C | -1.518286 | -3.683373 | 3.738481  | C                                           | 1.630393  | 1.267834  | 3.627567  |
| H | -2.126451 | 4.648962  | 3.317113  | C                                           | 1.630393  | 2.507550  | 2.911699  |
| H | -2.358619 | 4.709998  | 5.588080  | C                                           | 1.805000  | 2.521952  | 1.456200  |
| H | -2.358619 | 2.483352  | 6.873207  | C                                           | 1.805000  | 1.277889  | 0.737918  |
| H | -2.126451 | 0.548514  | 5.684672  | C                                           | 1.805000  | 1.277889  | -0.737918 |
| H | -1.493549 | 5.196754  | -2.367565 | C                                           | 1.805000  | 0.000000  | -1.476059 |
| H | -1.261381 | 7.193567  | -1.285493 | C                                           | 1.805000  | -1.277889 | -0.737918 |
| H | -1.261381 | 7.193567  | 1.285493  | C                                           | 1.805000  | -1.277889 | 0.737918  |
| H | -1.493549 | 5.196754  | 2.367565  | C                                           | 1.805000  | 0.000000  | 1.476059  |
| H | -2.126451 | 0.548514  | -5.684672 | C                                           | 1.416048  | 3.675877  | 3.704804  |
| H | -2.358619 | 2.483352  | -6.873207 | C                                           | 1.230326  | 3.725561  | 5.065499  |
| H | -2.358619 | 4.709998  | -5.588080 | C                                           | 1.230326  | 2.524451  | 5.759085  |
| H | -2.126451 | 4.648962  | -3.317113 | C                                           | 1.416048  | 1.370793  | 5.035972  |
| H | -1.493549 | -4.648962 | -3.317113 | C                                           | 2.193952  | 5.046055  | -1.330728 |
| H | -1.261381 | -4.709998 | -5.588080 | C                                           | 2.379674  | 6.249242  | -0.693480 |
| H | -1.261381 | -2.483352 | -6.873207 | C                                           | 2.379674  | 6.249242  | 0.693480  |
| H | -1.493549 | -0.548514 | -5.684672 | C                                           | 2.193952  | 5.046055  | 1.330728  |
| H | -2.126451 | -5.196754 | 2.367565  | C                                           | 1.416048  | 1.370793  | -5.035972 |
| H | -2.358619 | -7.193567 | 1.285493  | C                                           | 1.230326  | 2.524451  | -5.759085 |
| H | -2.358619 | -7.193567 | -1.285493 | C                                           | 1.230326  | 3.725561  | -5.065499 |
| H | -2.126451 | -5.196754 | -2.367565 | C                                           | 1.416048  | 3.675877  | -3.704804 |

|   |           |           |           |   |           |           |           |
|---|-----------|-----------|-----------|---|-----------|-----------|-----------|
| C | 2.193952  | -3.675877 | -3.704804 | C | -1.979607 | -3.774941 | -0.715820 |
| C | 2.379674  | -3.725561 | -5.065499 | C | -1.979607 | -3.774941 | 0.715820  |
| C | 2.379674  | -2.524451 | -5.759085 | C | -1.805000 | -2.521952 | 1.456200  |
| C | 2.193952  | -1.370793 | -5.035972 | C | -1.630393 | -2.507550 | 2.911699  |
| C | 1.416048  | -5.046055 | 1.330728  | C | -1.630393 | -1.267834 | 3.627567  |
| C | 1.230326  | -6.249242 | 0.693480  | C | -1.805000 | 0.000000  | 2.912336  |
| C | 1.230326  | -6.249242 | -0.693480 | C | -1.979607 | 1.267834  | 3.627567  |
| C | 1.416048  | -5.046055 | -1.330728 | C | -1.979607 | 2.507550  | 2.911699  |
| C | 2.193952  | -1.370793 | 5.035972  | C | -1.805000 | 2.521952  | 1.456200  |
| C | 2.379674  | -2.524451 | 5.759085  | C | -1.805000 | 1.277889  | 0.737918  |
| C | 2.379674  | -3.725561 | 5.065499  | C | -1.805000 | 1.277889  | -0.737918 |
| C | 2.193952  | -3.675877 | 3.704804  | C | -1.805000 | 0.000000  | -1.476059 |
| H | 1.383066  | 4.634461  | 3.258073  | C | -1.805000 | -1.277889 | -0.737918 |
| H | 1.068485  | 4.684060  | 5.551155  | C | -1.805000 | -1.277889 | 0.737918  |
| H | 1.068485  | 2.466274  | 6.832014  | C | -1.805000 | 0.000000  | 1.476059  |
| H | 1.383066  | 0.504761  | 5.642821  | C | -2.193952 | 3.675877  | 3.704804  |
| H | 2.226934  | 5.139011  | -2.384193 | C | -2.379674 | 3.725561  | 5.065499  |
| H | 2.541515  | 7.149255  | -1.280464 | C | -2.379674 | 2.524451  | 5.759085  |
| H | 2.541515  | 7.149255  | 1.280464  | C | -2.193952 | 1.370793  | 5.035972  |
| H | 2.226934  | 5.139011  | 2.384193  | C | -1.416048 | 5.046055  | -1.330728 |
| H | 1.383066  | 0.504761  | -5.642821 | C | -1.230326 | 6.249242  | -0.693480 |
| H | 1.068485  | 2.466274  | -6.832014 | C | -1.230326 | 6.249242  | 0.693480  |
| H | 1.068485  | 4.684060  | -5.551155 | C | -1.416048 | 5.046055  | 1.330728  |
| H | 1.383066  | 4.634461  | -3.258073 | C | -2.193952 | 1.370793  | -5.035972 |
| H | 2.226934  | -4.634461 | -3.258073 | C | -2.379674 | 2.524451  | -5.759085 |
| H | 2.541515  | -4.684060 | -5.551155 | C | -2.379674 | 3.725561  | -5.065499 |
| H | 2.541515  | -2.466274 | -6.832014 | C | -2.193952 | 3.675877  | -3.704804 |
| H | 2.226934  | -0.504761 | -5.642821 | C | -1.416048 | -3.675877 | -3.704804 |
| H | 1.383066  | -5.139011 | 2.384193  | C | -1.230326 | -3.725561 | -5.065499 |
| H | 1.068485  | -7.149255 | 1.280464  | C | -1.230326 | -2.524451 | -5.759085 |
| H | 1.068485  | -7.149255 | -1.280464 | C | -1.416048 | -1.370793 | -5.035972 |
| H | 1.383066  | -5.139011 | -2.384193 | C | -2.193952 | -5.046055 | 1.330728  |
| H | 2.226934  | -0.504761 | 5.642821  | C | -2.379674 | -6.249242 | 0.693480  |
| H | 2.541515  | -2.466274 | 6.832014  | C | -2.379674 | -6.249242 | -0.693480 |
| H | 2.541515  | -4.684060 | 5.551155  | C | -2.193952 | -5.046055 | -1.330728 |
| H | 2.226934  | -4.634461 | 3.258073  | C | -1.416048 | -1.370793 | 5.035972  |
| C | -1.630393 | 3.774941  | 0.715820  | C | -1.230326 | -2.524451 | 5.759085  |
| C | -1.630393 | 3.774941  | -0.715820 | C | -1.230326 | -3.725561 | 5.065499  |
| C | -1.805000 | 2.521952  | -1.456200 | C | -1.416048 | -3.675877 | 3.704804  |
| C | -1.979607 | 2.507550  | -2.911699 | H | -2.226934 | 4.634461  | 3.258073  |
| C | -1.979607 | 1.267834  | -3.627567 | H | -2.541515 | 4.684060  | 5.551155  |
| C | -1.805000 | 0.000000  | -2.912336 | H | -2.541515 | 2.466274  | 6.832014  |
| C | -1.630393 | -1.267834 | -3.627567 | H | -2.226934 | 0.504761  | 5.642821  |
| C | -1.630393 | -2.507550 | -2.911699 | H | -1.383066 | 5.139011  | -2.384193 |
| C | -1.805000 | -2.521952 | -1.456200 | H | -1.068485 | 7.149255  | -1.280464 |

|   |           |           |           |   |          |           |           |
|---|-----------|-----------|-----------|---|----------|-----------|-----------|
| H | -1.068485 | 7.149255  | 1.280464  | C | 1.800000 | -1.271173 | 0.734062  |
| H | -1.383066 | 5.139011  | 2.384193  | C | 1.800000 | 0.000000  | 1.468337  |
| H | -2.226934 | 0.504761  | -5.642821 | C | 1.313810 | 3.667036  | 3.664552  |
| H | -2.541515 | 2.466274  | -6.832014 | C | 1.077728 | 3.701463  | 5.019369  |
| H | -2.541515 | 4.684060  | -5.551155 | C | 1.077728 | 2.496800  | 5.714969  |
| H | -2.226934 | 4.634461  | -3.258073 | C | 1.313810 | 1.340892  | 5.007554  |
| H | -1.383066 | -4.634461 | -3.258073 | C | 2.286190 | 5.005983  | -1.343055 |
| H | -1.068485 | -4.684060 | -5.551155 | C | 2.522272 | 6.196448  | -0.695580 |
| H | -1.068485 | -2.466274 | -6.832014 | C | 2.522272 | 6.196448  | 0.695580  |
| H | -1.383066 | -0.504761 | -5.642821 | C | 2.286190 | 5.005983  | 1.343055  |
| H | -2.226934 | -5.139011 | 2.384193  | C | 1.313810 | 1.340892  | -5.007554 |
| H | -2.541515 | -7.149255 | 1.280464  | C | 1.077728 | 2.496800  | -5.714969 |
| H | -2.541515 | -7.149255 | -1.280464 | C | 1.077728 | 3.701463  | -5.019369 |
| H | -2.226934 | -5.139011 | -2.384193 | C | 1.313810 | 3.667036  | -3.664552 |
| H | -1.383066 | -0.504761 | 5.642821  | C | 2.286190 | -3.667036 | -3.664552 |
| H | -1.068485 | -2.466274 | 6.832014  | C | 2.522272 | -3.701463 | -5.019369 |
| H | -1.068485 | -4.684060 | 5.551155  | C | 2.522272 | -2.496800 | -5.714969 |
| H | -1.383066 | -4.634461 | 3.258073  | C | 2.286190 | -1.340892 | -5.007554 |

144

cf5, c-HBC\_homodimers with bowl depth: 0.49

|   |          |           |           |   |          |           |           |
|---|----------|-----------|-----------|---|----------|-----------|-----------|
| C | 2.017458 | 3.754460  | 0.715286  | C | 2.522272 | -2.496800 | 5.714969  |
| C | 2.017458 | 3.754460  | -0.715286 | C | 2.522272 | -3.701463 | 5.019369  |
| C | 1.800000 | 2.510453  | -1.449524 | C | 2.286190 | -3.667036 | 3.664552  |
| C | 1.582542 | 2.497371  | -2.894357 | H | 1.272582 | 4.618364  | 3.191393  |
| C | 1.582542 | 1.258405  | -3.609702 | H | 0.871275 | 4.650869  | 5.505913  |
| C | 1.800000 | 0.000000  | -2.899080 | H | 0.871275 | 2.443411  | 6.780448  |
| C | 2.017458 | -1.258405 | -3.609702 | H | 1.272582 | 0.455038  | 5.593979  |
| C | 2.017458 | -2.497371 | -2.894357 | H | 2.327418 | 5.070676  | -2.403483 |
| C | 1.800000 | -2.510453 | -1.449524 | H | 2.728725 | 7.092618  | -1.274425 |
| C | 1.582542 | -3.754460 | -0.715286 | H | 2.728725 | 7.092618  | 1.274425  |
| C | 1.582542 | -3.754460 | 0.715286  | H | 2.327418 | 5.070676  | 2.403483  |
| C | 1.800000 | -2.510453 | 1.449524  | H | 1.272582 | 0.455038  | -5.593979 |
| C | 2.017458 | -2.497371 | 2.894357  | H | 0.871275 | 2.443411  | -6.780448 |
| C | 2.017458 | -1.258405 | 3.609702  | H | 0.871275 | 4.650869  | -5.505913 |
| C | 1.800000 | 0.000000  | 2.899080  | H | 1.272582 | 4.618364  | -3.191393 |
| C | 1.582542 | 1.258405  | 3.609702  | H | 2.327418 | -4.618364 | -3.191393 |
| C | 1.582542 | 2.497371  | 2.894357  | H | 2.728725 | -4.650869 | -5.505913 |
| C | 1.800000 | 2.510453  | 1.449524  | H | 2.728725 | -2.443411 | -6.780448 |
| C | 1.800000 | 1.271173  | 0.734062  | H | 2.327418 | -0.455038 | -5.593979 |
| C | 1.800000 | 1.271173  | -0.734062 | H | 1.272582 | -5.070676 | 2.403483  |
| C | 1.800000 | 0.000000  | -1.468337 | H | 0.871275 | -7.092618 | 1.274425  |
| C | 1.800000 | -1.271173 | -0.734062 | H | 0.871275 | -7.092618 | -1.274425 |

|   |           |           |           |
|---|-----------|-----------|-----------|
| H | 1.272582  | -5.070676 | -2.403483 |
| H | 2.327418  | -0.455038 | 5.593979  |
| H | 2.728725  | -2.443411 | 6.780448  |
| H | 2.728725  | -4.650869 | 5.505913  |
| H | 2.327418  | -4.618364 | 3.191393  |
| C | -1.582542 | 3.754460  | 0.715286  |
| C | -1.582542 | 3.754460  | -0.715286 |
| C | -1.800000 | 2.510453  | -1.449524 |
| C | -2.017458 | 2.497371  | -2.894357 |
| C | -2.017458 | 1.258405  | -3.609702 |
| C | -1.800000 | 0.000000  | -2.899080 |
| C | -1.582542 | -1.258405 | -3.609702 |
| C | -1.582542 | -2.497371 | -2.894357 |
| C | -1.800000 | -2.510453 | -1.449524 |
| C | -2.017458 | -3.754460 | -0.715286 |
| C | -2.017458 | -3.754460 | 0.715286  |
| C | -1.800000 | -2.510453 | 1.449524  |
| C | -1.582542 | -2.497371 | 2.894357  |
| C | -1.582542 | -1.258405 | 3.609702  |
| C | -1.800000 | 0.000000  | 2.899080  |
| C | -2.017458 | 1.258405  | 3.609702  |
| C | -2.017458 | 2.497371  | 2.894357  |
| C | -1.800000 | 2.510453  | 1.449524  |
| C | -1.800000 | 1.271173  | 0.734062  |
| C | -1.800000 | 1.271173  | -0.734062 |
| C | -1.800000 | 0.000000  | -1.468337 |
| C | -1.800000 | -1.271173 | -0.734062 |
| C | -1.800000 | -1.271173 | 0.734062  |
| C | -1.800000 | 0.000000  | 1.468337  |
| C | -2.286190 | 3.667036  | 3.664552  |
| C | -2.522272 | 3.701463  | 5.019369  |
| C | -2.522272 | 2.496800  | 5.714969  |
| C | -2.286190 | 1.340892  | 5.007554  |
| C | -1.313810 | 5.005983  | -1.343055 |
| C | -1.077728 | 6.196448  | -0.695580 |
| C | -1.077728 | 6.196448  | 0.695580  |
| C | -1.313810 | 5.005983  | 1.343055  |
| C | -2.286190 | 1.340892  | -5.007554 |
| C | -2.522272 | 2.496800  | -5.714969 |
| C | -2.522272 | 3.701463  | -5.019369 |
| C | -2.286190 | 3.667036  | -3.664552 |
| C | -1.313810 | -3.667036 | -3.664552 |
| C | -1.077728 | -3.701463 | -5.019369 |
| C | -1.077728 | -2.496800 | -5.714969 |
| C | -1.313810 | -1.340892 | -5.007554 |

|   |           |           |           |
|---|-----------|-----------|-----------|
| C | -2.286190 | -5.005983 | 1.343055  |
| C | -2.522272 | -6.196448 | 0.695580  |
| C | -2.522272 | -6.196448 | -0.695580 |
| C | -2.286190 | -5.005983 | -1.343055 |
| C | -1.313810 | -1.340892 | 5.007554  |
| C | -1.077728 | -2.496800 | 5.714969  |
| C | -1.077728 | -3.701463 | 5.019369  |
| C | -1.313810 | -3.667036 | 3.664552  |
| H | -2.327418 | 4.618364  | 3.191393  |
| H | -2.728725 | 4.650869  | 5.505913  |
| H | -2.728725 | 2.443411  | 6.780448  |
| H | -2.327418 | 0.455038  | 5.593979  |
| H | -1.272582 | 5.070676  | -2.403483 |
| H | -0.871275 | 7.092618  | -1.274425 |
| H | -0.871275 | 7.092618  | 1.274425  |
| H | -1.272582 | 5.070676  | 2.403483  |
| H | -2.327418 | 0.455038  | -5.593979 |
| H | -2.728725 | 2.443411  | -6.780448 |
| H | -2.728725 | 4.650869  | -5.505913 |
| H | -2.327418 | 4.618364  | -3.191393 |
| H | -1.272582 | -4.618364 | -3.191393 |
| H | -0.871275 | -4.650869 | -5.505913 |
| H | -0.871275 | -2.443411 | -6.780448 |
| H | -1.272582 | -0.455038 | -5.593979 |
| H | -2.327418 | -5.070676 | 2.403483  |
| H | -2.728725 | -7.092618 | 1.274425  |
| H | -2.728725 | -7.092618 | -1.274425 |
| H | -2.327418 | -5.070676 | -2.403483 |
| H | -1.272582 | -0.455038 | 5.593979  |
| H | -0.871275 | -2.443411 | 6.780448  |
| H | -0.871275 | -4.650869 | 5.505913  |
| H | -1.272582 | -4.618364 | 3.191393  |

144  
cf6, c-HBC\_homodimers with bowl depth: 0.58

|   |          |           |           |
|---|----------|-----------|-----------|
| C | 2.060015 | 3.733455  | 0.715092  |
| C | 2.060015 | 3.733455  | -0.715092 |
| C | 1.800000 | 2.499105  | -1.443015 |
| C | 1.539985 | 2.486301  | -2.876389 |
| C | 1.539985 | 1.247422  | -3.590816 |
| C | 1.800000 | 0.000000  | -2.885236 |
| C | 2.060015 | -1.247422 | -3.590816 |
| C | 2.060015 | -2.486301 | -2.876389 |

|   |          |           |           |   |           |           |           |
|---|----------|-----------|-----------|---|-----------|-----------|-----------|
| C | 1.800000 | -2.499105 | -1.443015 | H | 2.924601  | 7.027370  | -1.268176 |
| C | 1.539985 | -3.733455 | -0.715092 | H | 2.924601  | 7.027370  | 1.268176  |
| C | 1.539985 | -3.733455 | 0.715092  | H | 2.432901  | 5.001921  | 2.422646  |
| C | 1.800000 | -2.499105 | 1.443015  | H | 1.167099  | 0.401276  | -5.542497 |
| C | 2.060015 | -2.486301 | 2.876389  | H | 0.675399  | 2.412493  | -6.721105 |
| C | 2.060015 | -1.247422 | 3.590816  | H | 0.675399  | 4.610131  | -5.454513 |
| C | 1.800000 | 0.000000  | 2.885236  | H | 1.167099  | 4.599951  | -3.124325 |
| C | 1.539985 | 1.247422  | 3.590816  | H | 2.432901  | -4.599951 | -3.124325 |
| C | 1.539985 | 2.486301  | 2.876389  | H | 2.924601  | -4.610131 | -5.454513 |
| C | 1.800000 | 2.499105  | 1.443015  | H | 2.924601  | -2.412493 | -6.721105 |
| C | 1.800000 | 1.264792  | 0.730215  | H | 2.432901  | -0.401276 | -5.542497 |
| C | 1.800000 | 1.264792  | -0.730215 | H | 1.167099  | -5.001921 | 2.422646  |
| C | 1.800000 | 0.000000  | -1.460219 | H | 0.675399  | -7.027370 | 1.268176  |
| C | 1.800000 | -1.264792 | -0.730215 | H | 0.675399  | -7.027370 | -1.268176 |
| C | 1.800000 | -1.264792 | 0.730215  | H | 1.167099  | -5.001921 | -2.422646 |
| C | 1.800000 | 0.000000  | 1.460219  | H | 2.432901  | -0.401276 | 5.542497  |
| C | 1.216572 | 3.655344  | 3.621770  | H | 2.924601  | -2.412493 | 6.721105  |
| C | 0.927875 | 3.671540  | 4.968530  | H | 2.924601  | -4.610131 | 5.454513  |
| C | 0.927875 | 2.462701  | 5.665353  | H | 2.432901  | -4.599951 | 3.124325  |
| C | 1.216572 | 1.306031  | 4.975903  | C | -1.539985 | 3.733455  | 0.715092  |
| C | 2.383428 | 4.962635  | -1.355841 | C | -1.539985 | 3.733455  | -0.715092 |
| C | 2.672125 | 6.137613  | -0.697684 | C | -1.800000 | 2.499105  | -1.443015 |
| C | 2.672125 | 6.137613  | 0.697684  | C | -2.060015 | 2.486301  | -2.876389 |
| C | 2.383428 | 4.962635  | 1.355841  | C | -2.060015 | 1.247422  | -3.590816 |
| C | 1.216572 | 1.306031  | -4.975903 | C | -1.800000 | 0.000000  | -2.885236 |
| C | 0.927875 | 2.462701  | -5.665353 | C | -1.539985 | -1.247422 | -3.590816 |
| C | 0.927875 | 3.671540  | -4.968530 | C | -1.539985 | -2.486301 | -2.876389 |
| C | 1.216572 | 3.655344  | -3.621770 | C | -1.800000 | -2.499105 | -1.443015 |
| C | 2.383428 | -3.655344 | -3.621770 | C | -2.060015 | -3.733455 | -0.715092 |
| C | 2.672125 | -3.671540 | -4.968530 | C | -2.060015 | -3.733455 | 0.715092  |
| C | 2.672125 | -2.462701 | -5.665353 | C | -1.800000 | -2.499105 | 1.443015  |
| C | 2.383428 | -1.306031 | -4.975903 | C | -1.539985 | -2.486301 | 2.876389  |
| C | 1.216572 | -4.962635 | 1.355841  | C | -1.539985 | -1.247422 | 3.590816  |
| C | 0.927875 | -6.137613 | 0.697684  | C | -1.800000 | 0.000000  | 2.885236  |
| C | 0.927875 | -6.137613 | -0.697684 | C | -2.060015 | 1.247422  | 3.590816  |
| C | 1.216572 | -4.962635 | -1.355841 | C | -2.060015 | 2.486301  | 2.876389  |
| C | 2.383428 | -1.306031 | 4.975903  | C | -1.800000 | 2.499105  | 1.443015  |
| C | 2.672125 | -2.462701 | 5.665353  | C | -1.800000 | 1.264792  | 0.730215  |
| C | 2.672125 | -3.671540 | 4.968530  | C | -1.800000 | 1.264792  | -0.730215 |
| C | 2.383428 | -3.655344 | 3.621770  | C | -1.800000 | 0.000000  | -1.460219 |
| H | 1.167099 | 4.599951  | 3.124325  | C | -1.800000 | -1.264792 | -0.730215 |
| H | 0.675399 | 4.610131  | 5.454513  | C | -1.800000 | -1.264792 | 0.730215  |
| H | 0.675399 | 2.412493  | 6.721105  | C | -1.800000 | 0.000000  | 1.460219  |
| H | 1.167099 | 0.401276  | 5.542497  | C | -2.383428 | 3.655344  | 3.621770  |
| H | 2.432901 | 5.001921  | -2.422646 | C | -2.672125 | 3.671540  | 4.968530  |

|   |           |           |           |                                             |           |           |           |
|---|-----------|-----------|-----------|---------------------------------------------|-----------|-----------|-----------|
| C | -2.672125 | 2.462701  | 5.665353  | H                                           | -1.167099 | -4.599951 | 3.124325  |
| C | -2.383428 | 1.306031  | 4.975903  |                                             |           |           |           |
| C | -1.216572 | 4.962635  | -1.355841 |                                             |           |           |           |
| C | -0.927875 | 6.137613  | -0.697684 |                                             |           |           |           |
| C | -0.927875 | 6.137613  | 0.697684  | 144                                         |           |           |           |
| C | -1.216572 | 4.962635  | 1.355841  | cf7, c-HBC_homodimers with bowl depth: 0.68 |           |           |           |
| C | -2.383428 | 1.306031  | -4.975903 | C                                           | 2.127399  | 3.712718  | 0.715184  |
| C | -2.672125 | 2.462701  | -5.665353 | C                                           | 2.127399  | 3.712718  | -0.715184 |
| C | -2.672125 | 3.671540  | -4.968530 | C                                           | 1.825000  | 2.488680  | -1.436815 |
| C | -2.383428 | 3.655344  | -3.621770 | C                                           | 1.522601  | 2.475904  | -2.857940 |
| C | -1.216572 | -3.655344 | -3.621770 | C                                           | 1.522601  | 1.236993  | -3.572735 |
| C | -0.927875 | -3.671540 | -4.968530 | C                                           | 1.825000  | 0.000000  | -2.873399 |
| C | -0.927875 | -2.462701 | -5.665353 | C                                           | 2.127399  | -1.236993 | -3.572735 |
| C | -1.216572 | -1.306031 | -4.975903 | C                                           | 2.127399  | -2.475904 | -2.857940 |
| C | -2.383428 | -4.962635 | 1.355841  | C                                           | 1.825000  | -2.488680 | -1.436815 |
| C | -2.672125 | -6.137613 | 0.697684  | C                                           | 1.522601  | -3.712718 | -0.715184 |
| C | -2.672125 | -6.137613 | -0.697684 | C                                           | 1.522601  | -3.712718 | 0.715184  |
| C | -2.383428 | -4.962635 | -1.355841 | C                                           | 1.825000  | -2.488680 | 1.436815  |
| C | -1.216572 | -1.306031 | 4.975903  | C                                           | 2.127399  | -2.475904 | 2.857940  |
| C | -0.927875 | -2.462701 | 5.665353  | C                                           | 2.127399  | -1.236993 | 3.572735  |
| C | -0.927875 | -3.671540 | 4.968530  | C                                           | 1.825000  | 0.000000  | 2.873399  |
| C | -1.216572 | -3.655344 | 3.621770  | C                                           | 1.522601  | 1.236993  | 3.572735  |
| H | -2.432901 | 4.599951  | 3.124325  | C                                           | 1.522601  | 2.475904  | 2.857940  |
| H | -2.924601 | 4.610131  | 5.454513  | C                                           | 1.825000  | 2.488680  | 1.436815  |
| H | -2.924601 | 2.412493  | 6.721105  | C                                           | 1.825000  | 1.258800  | 0.726759  |
| H | -2.432901 | 0.401276  | 5.542497  | C                                           | 1.825000  | 1.258800  | -0.726759 |
| H | -1.167099 | 5.001921  | -2.422646 | C                                           | 1.825000  | 0.000000  | -1.453365 |
| H | -0.675399 | 7.027370  | -1.268176 | C                                           | 1.825000  | -1.258800 | -0.726759 |
| H | -0.675399 | 7.027370  | 1.268176  | C                                           | 1.825000  | -1.258800 | 0.726759  |
| H | -1.167099 | 5.001921  | 2.422646  | C                                           | 1.825000  | 0.000000  | 1.453365  |
| H | -2.432901 | 0.401276  | -5.542497 | C                                           | 1.144334  | 3.643188  | 3.575824  |
| H | -2.924601 | 2.412493  | -6.721105 | C                                           | 0.803589  | 3.642613  | 4.912222  |
| H | -2.924601 | 4.610131  | -5.454513 | C                                           | 0.803589  | 2.430751  | 5.611320  |
| H | -2.432901 | 4.599951  | -3.124325 | C                                           | 1.144334  | 1.273887  | 4.942558  |
| H | -1.167099 | -4.599951 | -3.124325 | C                                           | 2.505666  | 4.917656  | -1.367709 |
| H | -0.675399 | -4.610131 | -5.454513 | C                                           | 2.846411  | 6.075007  | -0.699550 |
| H | -0.675399 | -2.412493 | -6.721105 | C                                           | 2.846411  | 6.075007  | 0.699550  |
| H | -1.167099 | -0.401276 | -5.542497 | C                                           | 2.505666  | 4.917656  | 1.367709  |
| H | -2.432901 | -5.001921 | 2.422646  | C                                           | 1.144334  | 1.273887  | -4.942558 |
| H | -2.924601 | -7.027370 | 1.268176  | C                                           | 0.803589  | 2.430751  | -5.611320 |
| H | -2.924601 | -7.027370 | -1.268176 | C                                           | 0.803589  | 3.642613  | -4.912222 |
| H | -2.432901 | -5.001921 | -2.422646 | C                                           | 1.144334  | 3.643188  | -3.575824 |
| H | -1.167099 | -0.401276 | 5.542497  | C                                           | 2.505666  | -3.643188 | -3.575824 |
| H | -0.675399 | -2.412493 | 6.721105  | C                                           | 2.846411  | -3.642613 | -4.912222 |
| H | -0.675399 | -4.610131 | 5.454513  | C                                           | 2.846411  | -2.430751 | -5.611320 |

|   |           |           |           |   |           |           |           |
|---|-----------|-----------|-----------|---|-----------|-----------|-----------|
| C | 2.505666  | -1.273887 | -4.942558 | C | -1.522601 | -2.475904 | 2.857940  |
| C | 1.144334  | -4.917656 | 1.367709  | C | -1.522601 | -1.236993 | 3.572735  |
| C | 0.803589  | -6.075007 | 0.699550  | C | -1.825000 | 0.000000  | 2.873399  |
| C | 0.803589  | -6.075007 | -0.699550 | C | -2.127399 | 1.236993  | 3.572735  |
| C | 1.144334  | -4.917656 | -1.367709 | C | -2.127399 | 2.475904  | 2.857940  |
| C | 2.505666  | -1.273887 | 4.942558  | C | -1.825000 | 2.488680  | 1.436815  |
| C | 2.846411  | -2.430751 | 5.611320  | C | -1.825000 | 1.258800  | 0.726759  |
| C | 2.846411  | -3.642613 | 4.912222  | C | -1.825000 | 1.258800  | -0.726759 |
| C | 2.505666  | -3.643188 | 3.575824  | C | -1.825000 | 0.000000  | -1.453365 |
| H | 1.086615  | 4.581226  | 3.056642  | C | -1.825000 | -1.258800 | -0.726759 |
| H | 0.506410  | 4.570250  | 5.394106  | C | -1.825000 | -1.258800 | 0.726759  |
| H | 0.506410  | 2.383365  | 6.655566  | C | -1.825000 | 0.000000  | 1.453365  |
| H | 1.086615  | 0.354480  | 5.494018  | C | -2.505666 | 3.643188  | 3.575824  |
| H | 2.563385  | 4.936374  | -2.439744 | C | -2.846411 | 3.642613  | 4.912222  |
| H | 3.143590  | 6.955908  | -1.262320 | C | -2.846411 | 2.430751  | 5.611320  |
| H | 3.143590  | 6.955908  | 1.262320  | C | -2.505666 | 1.273887  | 4.942558  |
| H | 2.563385  | 4.936374  | 2.439744  | C | -1.144334 | 4.917656  | -1.367709 |
| H | 1.086615  | 0.354480  | -5.494018 | C | -0.803589 | 6.075007  | -0.699550 |
| H | 0.506410  | 2.383365  | -6.655566 | C | -0.803589 | 6.075007  | 0.699550  |
| H | 0.506410  | 4.570250  | -5.394106 | C | -1.144334 | 4.917656  | 1.367709  |
| H | 1.086615  | 4.581226  | -3.056642 | C | -2.505666 | 1.273887  | -4.942558 |
| H | 2.563385  | -4.581226 | -3.056642 | C | -2.846411 | 2.430751  | -5.611320 |
| H | 3.143590  | -4.570250 | -5.394106 | C | -2.846411 | 3.642613  | -4.912222 |
| H | 3.143590  | -2.383365 | -6.655566 | C | -2.505666 | 3.643188  | -3.575824 |
| H | 2.563385  | -0.354480 | -5.494018 | C | -1.144334 | -3.643188 | -3.575824 |
| H | 1.086615  | -4.936374 | 2.439744  | C | -0.803589 | -3.642613 | -4.912222 |
| H | 0.506410  | -6.955908 | 1.262320  | C | -0.803589 | -2.430751 | -5.611320 |
| H | 0.506410  | -6.955908 | -1.262320 | C | -1.144334 | -1.273887 | -4.942558 |
| H | 1.086615  | -4.936374 | -2.439744 | C | -2.505666 | -4.917656 | 1.367709  |
| H | 2.563385  | -0.354480 | 5.494018  | C | -2.846411 | -6.075007 | 0.699550  |
| H | 3.143590  | -2.383365 | 6.655566  | C | -2.846411 | -6.075007 | -0.699550 |
| H | 3.143590  | -4.570250 | 5.394106  | C | -2.505666 | -4.917656 | -1.367709 |
| H | 2.563385  | -4.581226 | 3.056642  | C | -1.144334 | -1.273887 | 4.942558  |
| C | -1.522601 | 3.712718  | 0.715184  | C | -0.803589 | -2.430751 | 5.611320  |
| C | -1.522601 | 3.712718  | -0.715184 | C | -0.803589 | -3.642613 | 4.912222  |
| C | -1.825000 | 2.488680  | -1.436815 | C | -1.144334 | -3.643188 | 3.575824  |
| C | -2.127399 | 2.475904  | -2.857940 | H | -2.563385 | 4.581226  | 3.056642  |
| C | -2.127399 | 1.236993  | -3.572735 | H | -3.143590 | 4.570250  | 5.394106  |
| C | -1.825000 | 0.000000  | -2.873399 | H | -3.143590 | 2.383365  | 6.655566  |
| C | -1.522601 | -1.236993 | -3.572735 | H | -2.563385 | 0.354480  | 5.494018  |
| C | -1.522601 | -2.475904 | -2.857940 | H | -1.086615 | 4.936374  | -2.439744 |
| C | -1.825000 | -2.488680 | -1.436815 | H | -0.506410 | 6.955908  | -1.262320 |
| C | -2.127399 | -3.712718 | -0.715184 | H | -0.506410 | 6.955908  | 1.262320  |
| C | -2.127399 | -3.712718 | 0.715184  | H | -1.086615 | 4.936374  | 2.439744  |
| C | -1.825000 | -2.488680 | 1.436815  | H | -2.563385 | 0.354480  | -5.494018 |



|   |           |           |           |   |          |           |           |
|---|-----------|-----------|-----------|---|----------|-----------|-----------|
| H | -3.143590 | 2.383365  | -6.655566 | C | 0.712918 | 3.610388  | 4.852189  |
| H | -3.143590 | 4.570250  | -5.394106 | C | 0.712918 | 2.396154  | 5.553045  |
| H | -2.563385 | 4.581226  | -3.056642 | C | 1.112095 | 1.242804  | 4.907557  |
| H | -1.086615 | -4.581226 | -3.056642 | C | 2.667905 | 4.871586  | -1.377361 |
| H | -0.506410 | -4.570250 | -5.394106 | C | 3.067082 | 6.007185  | -0.701015 |
| H | -0.506410 | -2.383365 | -6.655566 | C | 3.067082 | 6.007185  | 0.701015  |
| H | -1.086615 | -0.354480 | -5.494018 | C | 2.667905 | 4.871586  | 1.377361  |
| H | -2.563385 | -4.936374 | 2.439744  | C | 1.112095 | 1.242804  | -4.907557 |
| H | -3.143590 | -6.955908 | 1.262320  | C | 0.712918 | 2.396154  | -5.553045 |
| H | -3.143590 | -6.955908 | -1.262320 | C | 0.712918 | 3.610388  | -4.852189 |
| H | -2.563385 | -4.936374 | -2.439744 | C | 1.112095 | 3.628540  | -3.530559 |
| H | -1.086615 | -0.354480 | 5.494018  | C | 2.667905 | -3.628540 | -3.530559 |
| H | -0.506410 | -2.383365 | 6.655566  | C | 3.067082 | -3.610388 | -4.852189 |
| H | -0.506410 | -4.570250 | 5.394106  | C | 3.067082 | -2.396154 | -5.553045 |
| H | -1.086615 | -4.581226 | 3.056642  | C | 2.667905 | -1.242804 | -4.907557 |

144

cf8, c-HBC\_homodimers with bowl depth: 0.78

|   |          |           |           |   |          |           |           |
|---|----------|-----------|-----------|---|----------|-----------|-----------|
| C | 2.232601 | 3.693207  | 0.715499  | C | 0.712918 | -4.871586 | -1.377361 |
| C | 2.232601 | 3.693207  | -0.715499 | C | 2.667905 | -1.242804 | 4.907557  |
| C | 1.890000 | 2.479858  | -1.431690 | C | 3.067082 | -2.396154 | 5.553045  |
| C | 1.547399 | 2.466326  | -2.840747 | C | 3.067082 | -3.610388 | 4.852189  |
| C | 1.547399 | 1.226933  | -3.556147 | C | 2.667905 | -3.628540 | 3.530559  |
| C | 1.890000 | 0.000000  | -2.863424 | H | 1.046132 | 4.561236  | 2.994717  |
| C | 2.232601 | -1.226933 | -3.556147 | H | 0.366201 | 4.525678  | 5.324479  |
| C | 2.232601 | -2.466326 | -2.840747 | H | 0.366201 | 2.347226  | 6.581824  |
| C | 1.890000 | -2.479858 | -1.431690 | H | 1.046132 | 0.312211  | 5.446957  |
| C | 1.547399 | -3.693207 | -0.715499 | H | 2.733868 | 4.873694  | -2.453113 |
| C | 1.547399 | -3.693207 | 0.715499  | H | 3.413799 | 6.873742  | -1.257659 |
| C | 1.890000 | -2.479858 | 1.431690  | H | 3.413799 | 6.873742  | 1.257659  |
| C | 2.232601 | -2.466326 | 2.840747  | H | 2.733868 | 4.873694  | 2.453113  |
| C | 2.232601 | -1.226933 | 3.556147  | H | 1.046132 | 0.312211  | -5.446957 |
| C | 1.890000 | 0.000000  | 2.863424  | H | 0.366201 | 2.347226  | -6.581824 |
| C | 1.547399 | 1.226933  | 3.556147  | H | 0.366201 | 4.525678  | -5.324479 |
| C | 1.547399 | 2.466326  | 2.840747  | H | 1.046132 | 4.561236  | -2.994717 |
| C | 1.890000 | 2.479858  | 1.431690  | H | 2.733868 | -4.561236 | -2.994717 |
| C | 1.890000 | 1.253749  | 0.723893  | H | 3.413799 | -4.525678 | -5.324479 |
| C | 1.890000 | 1.253749  | -0.723893 | H | 3.413799 | -2.347226 | -6.581824 |
| C | 1.890000 | 0.000000  | -1.447809 | H | 2.733868 | -0.312211 | -5.446957 |
| C | 1.890000 | -1.253749 | -0.723893 | H | 1.046132 | -4.873694 | 2.453113  |
| C | 1.890000 | -1.253749 | 0.723893  | H | 0.366201 | -6.873742 | 1.257659  |
| C | 1.890000 | 0.000000  | 1.447809  | H | 0.366201 | -6.873742 | -1.257659 |
| C | 1.112095 | 3.628540  | 3.530559  | H | 1.046132 | -4.873694 | -2.453113 |
|   |          |           |           | H | 2.733868 | -0.312211 | 5.446957  |
|   |          |           |           | H | 3.413799 | -2.347226 | 6.581824  |

|   |           |           |           |
|---|-----------|-----------|-----------|
| H | 3.413799  | -4.525678 | 5.324479  |
| H | 2.733868  | -4.561236 | 2.994717  |
| C | -1.547399 | 3.693207  | 0.715499  |
| C | -1.547399 | 3.693207  | -0.712918 |
| C | -1.890000 | 2.479858  | -1.431690 |
| C | -2.232601 | 2.466326  | -2.840747 |
| C | -2.232601 | 1.226933  | -3.556147 |
| C | -1.890000 | 0.000000  | -2.863424 |
| C | -1.547399 | -1.226933 | -3.556147 |
| C | -1.547399 | -2.466326 | -2.840747 |
| C | -1.890000 | -2.479858 | -1.431690 |
| C | -2.232601 | -3.693207 | -0.715499 |
| C | -2.232601 | -3.693207 | 0.715499  |
| C | -1.890000 | -2.479858 | 1.431690  |
| C | -1.547399 | -2.466326 | 2.840747  |
| C | -1.547399 | -1.226933 | 3.556147  |
| C | -1.890000 | 0.000000  | 2.863424  |
| C | -2.232601 | 1.226933  | 3.556147  |
| C | -2.232601 | 2.466326  | 2.840747  |
| C | -1.890000 | 2.479858  | 1.431690  |
| C | -1.890000 | 1.253749  | 0.723893  |
| C | -1.890000 | 1.253749  | -0.723893 |
| C | -1.890000 | 0.000000  | -1.447809 |
| C | -1.890000 | -1.253749 | -0.723893 |
| C | -1.890000 | -1.253749 | 0.723893  |
| C | -1.890000 | 0.000000  | 1.447809  |
| C | -2.667905 | 3.628540  | 3.530559  |
| C | -3.067082 | 3.610388  | 4.852189  |
| C | -3.067082 | 2.396154  | 5.553045  |
| C | -2.667905 | 1.242804  | 4.907557  |
| C | -1.112095 | 4.871586  | -1.377361 |
| C | -0.712918 | 6.007185  | -0.701015 |
| C | -0.712918 | 6.007185  | 0.701015  |
| C | -1.112095 | 4.871586  | 1.377361  |
| C | -2.667905 | 1.242804  | -4.907557 |
| C | -3.067082 | 2.396154  | -5.553045 |
| C | -3.067082 | 3.610388  | -4.852189 |
| C | -2.667905 | 3.628540  | -3.530559 |
| C | -1.112095 | -3.628540 | -3.530559 |
| C | -0.712918 | -3.610388 | -4.852189 |
| C | -0.712918 | -2.396154 | -5.553045 |
| C | -1.112095 | -1.242804 | -4.907557 |
| C | -2.667905 | -4.871586 | 1.377361  |
| C | -3.067082 | -6.007185 | 0.701015  |
| C | -3.067082 | -6.007185 | -0.701015 |

|   |           |           |           |
|---|-----------|-----------|-----------|
| C | -2.667905 | -4.871586 | -1.377361 |
| C | -1.112095 | -1.242804 | 4.907557  |
| C | -0.712918 | -2.396154 | 5.553045  |
| C | -0.712918 | -3.610388 | 4.852189  |
| C | -1.112095 | -3.628540 | 3.530559  |
| H | -2.733868 | 4.561236  | 2.994717  |
| H | -3.413799 | 4.525678  | 5.324479  |
| H | -3.413799 | 2.347226  | 6.581824  |
| H | -2.733868 | 0.312211  | 5.446957  |
| H | -1.046132 | 4.873694  | -2.453113 |
| H | -0.366201 | 6.873742  | -1.257659 |
| H | -0.366201 | 6.873742  | 1.257659  |
| H | -1.046132 | 4.873694  | 2.453113  |
| H | -2.733868 | 0.312211  | -5.446957 |
| H | -3.413799 | 2.347226  | -6.581824 |
| H | -3.413799 | 4.525678  | -5.324479 |
| H | -2.733868 | 4.561236  | -2.994717 |
| H | -1.046132 | -4.561236 | -2.994717 |
| H | -0.366201 | -4.525678 | -5.324479 |
| H | -0.366201 | -2.347226 | -6.581824 |
| H | -1.046132 | -0.312211 | -5.446957 |
| H | -2.733868 | -4.873694 | 2.453113  |
| H | -3.413799 | -6.873742 | 1.257659  |
| H | -3.413799 | -6.873742 | -1.257659 |
| H | -2.733868 | -4.873694 | -2.453113 |
| H | -1.046132 | -0.312211 | 5.446957  |
| H | -0.366201 | -2.347226 | 6.581824  |
| H | -0.366201 | -4.525678 | 5.324479  |
| H | -1.046132 | -4.561236 | 2.994717  |

144  
cf9, c-HBC\_homodimers with bowl depth: 0.88

|   |          |           |           |
|---|----------|-----------|-----------|
| C | 2.358342 | 3.674611  | 0.716164  |
| C | 2.358342 | 3.674611  | -0.716164 |
| C | 1.975000 | 2.472708  | -1.427494 |
| C | 1.591658 | 2.457475  | -2.824075 |
| C | 1.591658 | 1.217043  | -3.540448 |
| C | 1.975000 | 0.000000  | -2.855361 |
| C | 2.358342 | -1.217043 | -3.540448 |
| C | 2.358342 | -2.457475 | -2.824075 |
| C | 1.975000 | -2.472708 | -1.427494 |
| C | 1.591658 | -3.674611 | -0.716164 |
| C | 1.591658 | -3.674611 | 0.716164  |

|   |          |           |           |   |           |           |           |
|---|----------|-----------|-----------|---|-----------|-----------|-----------|
| C | 1.975000 | -2.472708 | 1.427494  | H | 1.025648  | 0.273097  | -5.399982 |
| C | 2.358342 | -2.457475 | 2.824075  | H | 0.258442  | 2.309174  | -6.507044 |
| C | 2.358342 | -1.217043 | 3.540448  | H | 0.258442  | 4.481294  | -5.252371 |
| C | 1.975000 | 0.000000  | 2.855361  | H | 1.025648  | 4.539775  | -2.935734 |
| C | 1.591658 | 1.217043  | 3.540448  | H | 2.924352  | -4.539775 | -2.935734 |
| C | 1.591658 | 2.457475  | 2.824075  | H | 3.691558  | -4.481294 | -5.252371 |
| C | 1.975000 | 2.472708  | 1.427494  | H | 3.691558  | -2.309174 | -6.507044 |
| C | 1.975000 | 1.249661  | 0.721548  | H | 2.924352  | -0.273097 | -5.399982 |
| C | 1.975000 | 1.249661  | -0.721548 | H | 1.025648  | -4.812830 | 2.463693  |
| C | 1.975000 | 0.000000  | -1.443188 | H | 0.258442  | -6.789700 | 1.254227  |
| C | 1.975000 | -1.249661 | -0.721548 | H | 0.258442  | -6.789700 | -1.254227 |
| C | 1.975000 | -1.249661 | 0.721548  | H | 1.025648  | -4.812830 | -2.463693 |
| C | 1.975000 | 0.000000  | 1.443188  | H | 2.924352  | -0.273097 | 5.399982  |
| C | 1.099857 | 3.612157  | 3.485617  | H | 3.691558  | -2.309174 | 6.507044  |
| C | 0.648966 | 3.577647  | 4.791755  | H | 3.691558  | -4.481294 | 5.252371  |
| C | 0.648966 | 2.361565  | 5.494155  | H | 2.924352  | -4.539775 | 2.935734  |
| C | 1.099857 | 1.212964  | 4.871324  | C | -1.591658 | 3.674611  | 0.716164  |
| C | 2.850143 | 4.825039  | -1.385311 | C | -1.591658 | 3.674611  | -0.716164 |
| C | 3.301034 | 5.938833  | -0.702196 | C | -1.975000 | 2.472708  | -1.427494 |
| C | 3.301034 | 5.938833  | 0.702196  | C | -2.358342 | 2.457475  | -2.824075 |
| C | 2.850143 | 4.825039  | 1.385311  | C | -2.358342 | 1.217043  | -3.540448 |
| C | 1.099857 | 1.212964  | -4.871324 | C | -1.975000 | 0.000000  | -2.855361 |
| C | 0.648966 | 2.361565  | -5.494155 | C | -1.591658 | -1.217043 | -3.540448 |
| C | 0.648966 | 3.577647  | -4.791755 | C | -1.591658 | -2.457475 | -2.824075 |
| C | 1.099857 | 3.612157  | -3.485617 | C | -1.975000 | -2.472708 | -1.427494 |
| C | 2.850143 | -3.612157 | -3.485617 | C | -2.358342 | -3.674611 | -0.716164 |
| C | 3.301034 | -3.577647 | -4.791755 | C | -2.358342 | -3.674611 | 0.716164  |
| C | 3.301034 | -2.361565 | -5.494155 | C | -1.975000 | -2.472708 | 1.427494  |
| C | 2.850143 | -1.212964 | -4.871324 | C | -1.591658 | -2.457475 | 2.824075  |
| C | 1.099857 | -4.825039 | 1.385311  | C | -1.591658 | -1.217043 | 3.540448  |
| C | 0.648966 | -5.938833 | 0.702196  | C | -1.975000 | 0.000000  | 2.855361  |
| C | 0.648966 | -5.938833 | -0.702196 | C | -2.358342 | 1.217043  | 3.540448  |
| C | 1.099857 | -4.825039 | -1.385311 | C | -2.358342 | 2.457475  | 2.824075  |
| C | 2.850143 | -1.212964 | 4.871324  | C | -1.975000 | 2.472708  | 1.427494  |
| C | 3.301034 | -2.361565 | 5.494155  | C | -1.975000 | 1.249661  | 0.721548  |
| C | 3.301034 | -3.577647 | 4.791755  | C | -1.975000 | 1.249661  | -0.721548 |
| C | 2.850143 | -3.612157 | 3.485617  | C | -1.975000 | 0.000000  | -1.443188 |
| H | 1.025648 | 4.539775  | 2.935734  | C | -1.975000 | -1.249661 | -0.721548 |
| H | 0.258442 | 4.481294  | 5.252371  | C | -1.975000 | -1.249661 | 0.721548  |
| H | 0.258442 | 2.309174  | 6.507044  | C | -1.975000 | 0.000000  | 1.443188  |
| H | 1.025648 | 0.273097  | 5.399982  | C | -2.850143 | 3.612157  | 3.485617  |
| H | 2.924352 | 4.812830  | -2.463693 | C | -3.301034 | 3.577647  | 4.791755  |
| H | 3.691558 | 6.789700  | -1.254227 | C | -3.301034 | 2.361565  | 5.494155  |
| H | 3.691558 | 6.789700  | 1.254227  | C | -2.850143 | 1.212964  | 4.871324  |
| H | 2.924352 | 4.812830  | 2.463693  | C | -1.099857 | 4.825039  | -1.385311 |

|   |           |           |           |                                              |          |           |           |
|---|-----------|-----------|-----------|----------------------------------------------|----------|-----------|-----------|
| C | -0.648966 | 5.938833  | -0.702196 | 144                                          |          |           |           |
| C | -0.648966 | 5.938833  | 0.702196  | cf10, c-HBC_homodimers with bowl depth: 0.97 |          |           |           |
| C | -1.099857 | 4.825039  | 1.385311  |                                              |          |           |           |
| C | -2.850143 | 1.212964  | -4.871324 | C                                            | 2.537503 | 3.655806  | 0.716950  |
| C | -3.301034 | 2.361565  | -5.494155 | C                                            | 2.537503 | 3.655806  | -0.716950 |
| C | -3.301034 | 3.577647  | -4.791755 | C                                            | 2.115000 | 2.466249  | -1.423834 |
| C | -2.850143 | 3.612157  | -3.485617 | C                                            | 1.692497 | 2.448608  | -2.807547 |
| C | -1.099857 | -3.612157 | -3.485617 | C                                            | 1.692497 | 1.206820  | -3.524503 |
| C | -0.648966 | -3.577647 | -4.791755 | C                                            | 2.115000 | 0.000000  | -2.847667 |
| C | -0.648966 | -2.361565 | -5.494155 | C                                            | 2.537503 | -1.206820 | -3.524503 |
| C | -1.099857 | -1.212964 | -4.871324 | C                                            | 2.537503 | -2.448608 | -2.807547 |
| C | -2.850143 | -4.825039 | 1.385311  | C                                            | 2.115000 | -2.466249 | -1.423834 |
| C | -3.301034 | -5.938833 | 0.702196  | C                                            | 1.692497 | -3.655806 | -0.716950 |
| C | -3.301034 | -5.938833 | -0.702196 | C                                            | 1.692497 | -3.655806 | 0.716950  |
| C | -2.850143 | -4.825039 | -1.385311 | C                                            | 2.115000 | -2.466249 | 1.423834  |
| C | -1.099857 | -1.212964 | 4.871324  | C                                            | 2.537503 | -2.448608 | 2.807547  |
| C | -0.648966 | -2.361565 | 5.494155  | C                                            | 2.537503 | -1.206820 | 3.524503  |
| C | -0.648966 | -3.577647 | 4.791755  | C                                            | 2.115000 | 0.000000  | 2.847667  |
| C | -1.099857 | -3.612157 | 3.485617  | C                                            | 1.692497 | 1.206820  | 3.524503  |
| H | -2.924352 | 4.539775  | 2.935734  | C                                            | 1.692497 | 2.448608  | 2.807547  |
| H | -3.691558 | 4.481294  | 5.252371  | C                                            | 2.115000 | 2.466249  | 1.423834  |
| H | -3.691558 | 2.309174  | 6.507044  | C                                            | 2.115000 | 1.246049  | 0.719408  |
| H | -2.924352 | 0.273097  | 5.399982  | C                                            | 2.115000 | 1.246049  | -0.719408 |
| H | -1.025648 | 4.812830  | -2.463693 | C                                            | 2.115000 | 0.000000  | -1.438745 |
| H | -0.258442 | 6.789700  | -1.254227 | C                                            | 2.115000 | -1.246049 | -0.719408 |
| H | -0.258442 | 6.789700  | 1.254227  | C                                            | 2.115000 | -1.246049 | 0.719408  |
| H | -1.025648 | 4.812830  | 2.463693  | C                                            | 2.115000 | 0.000000  | 1.438745  |
| H | -2.924352 | 0.273097  | -5.399982 | C                                            | 1.142619 | 3.592716  | 3.439074  |
| H | -3.691558 | 2.309174  | -6.507044 | C                                            | 0.636270 | 3.539577  | 4.725616  |
| H | -3.691558 | 4.481294  | -5.252371 | C                                            | 0.636270 | 2.321708  | 5.428703  |
| H | -2.924352 | 4.539775  | -2.935734 | C                                            | 1.142619 | 1.181228  | 4.831145  |
| H | -1.025648 | -4.539775 | -2.935734 | C                                            | 3.087381 | 4.774679  | -1.392136 |
| H | -0.258442 | -4.481294 | -5.252371 | C                                            | 3.593730 | 5.862372  | -0.703121 |
| H | -0.258442 | -2.309174 | -6.507044 | C                                            | 3.593730 | 5.862372  | 0.703121  |
| H | -1.025648 | -0.273097 | -5.399982 | C                                            | 3.087381 | 4.774679  | 1.392136  |
| H | -2.924352 | -4.812830 | 2.463693  | C                                            | 1.142619 | 1.181228  | -4.831145 |
| H | -3.691558 | -6.789700 | 1.254227  | C                                            | 0.636270 | 2.321708  | -5.428703 |
| H | -3.691558 | -6.789700 | -1.254227 | C                                            | 0.636270 | 3.539577  | -4.725616 |
| H | -2.924352 | -4.812830 | -2.463693 | C                                            | 1.142619 | 3.592716  | -3.439074 |
| H | -1.025648 | -0.273097 | 5.399982  | C                                            | 3.087381 | -3.592716 | -3.439074 |
| H | -0.258442 | -2.309174 | 6.507044  | C                                            | 3.593730 | -3.539577 | -4.725616 |
| H | -0.258442 | -4.481294 | 5.252371  | C                                            | 3.593730 | -2.321708 | -5.428703 |
| H | -1.025648 | -4.539775 | 2.935734  | C                                            | 3.087381 | -1.181228 | -4.831145 |
|   |           |           |           | C                                            | 1.142619 | -4.774679 | 1.392136  |
|   |           |           |           | C                                            | 0.636270 | -5.862372 | 0.703121  |

|   |           |           |           |   |           |           |           |
|---|-----------|-----------|-----------|---|-----------|-----------|-----------|
| C | 0.636270  | -5.862372 | -0.703121 | C | -2.537503 | 1.206820  | 3.524503  |
| C | 1.142619  | -4.774679 | -1.392136 | C | -2.537503 | 2.448608  | 2.807547  |
| C | 3.087381  | -1.181228 | 4.831145  | C | -2.115000 | 2.466249  | 1.423834  |
| C | 3.593730  | -2.321708 | 5.428703  | C | -2.115000 | 1.246049  | 0.719408  |
| C | 3.593730  | -3.539577 | 4.725616  | C | -2.115000 | 1.246049  | -0.719408 |
| C | 3.087381  | -3.592716 | 3.439074  | C | -2.115000 | 0.000000  | -1.438745 |
| H | 1.060165  | 4.514831  | 2.875927  | C | -2.115000 | -1.246049 | -0.719408 |
| H | 0.198130  | 4.429041  | 5.170770  | C | -2.115000 | -1.246049 | 0.719408  |
| H | 0.198130  | 2.262238  | 6.421544  | C | -2.115000 | 0.000000  | 1.438745  |
| H | 1.060165  | 0.232345  | 5.347771  | C | -3.087381 | 3.592716  | 3.439074  |
| H | 3.169835  | 4.747651  | -2.472254 | C | -3.593730 | 3.539577  | 4.725616  |
| H | 4.031870  | 6.692546  | -1.250943 | C | -3.593730 | 2.321708  | 5.428703  |
| H | 4.031870  | 6.692546  | 1.250943  | C | -3.087381 | 1.181228  | 4.831145  |
| H | 3.169835  | 4.747651  | 2.472254  | C | -1.142619 | 4.774679  | -1.392136 |
| H | 1.060165  | 0.232345  | -5.347771 | C | -0.636270 | 5.862372  | -0.703121 |
| H | 0.198130  | 2.262238  | -6.421544 | C | -0.636270 | 5.862372  | 0.703121  |
| H | 0.198130  | 4.429041  | -5.170770 | C | -1.142619 | 4.774679  | 1.392136  |
| H | 1.060165  | 4.514831  | -2.875927 | C | -3.087381 | 1.181228  | -4.831145 |
| H | 3.169835  | -4.514831 | -2.875927 | C | -3.593730 | 2.321708  | -5.428703 |
| H | 4.031870  | -4.429041 | -5.170770 | C | -3.593730 | 3.539577  | -4.725616 |
| H | 4.031870  | -2.262238 | -6.421544 | C | -3.087381 | 3.592716  | -3.439074 |
| H | 3.169835  | -0.232345 | -5.347771 | C | -1.142619 | -3.592716 | -3.439074 |
| H | 1.060165  | -4.747651 | 2.472254  | C | -0.636270 | -3.539577 | -4.725616 |
| H | 0.198130  | -6.692546 | 1.250943  | C | -0.636270 | -2.321708 | -5.428703 |
| H | 0.198130  | -6.692546 | -1.250943 | C | -1.142619 | -1.181228 | -4.831145 |
| H | 1.060165  | -4.747651 | -2.472254 | C | -3.087381 | -4.774679 | 1.392136  |
| H | 3.169835  | -0.232345 | 5.347771  | C | -3.593730 | -5.862372 | 0.703121  |
| H | 4.031870  | -2.262238 | 6.421544  | C | -3.593730 | -5.862372 | -0.703121 |
| H | 4.031870  | -4.429041 | 5.170770  | C | -3.087381 | -4.774679 | -1.392136 |
| H | 3.169835  | -4.514831 | 2.875927  | C | -1.142619 | -1.181228 | 4.831145  |
| C | -1.692497 | 3.655806  | 0.716950  | C | -0.636270 | -2.321708 | 5.428703  |
| C | -1.692497 | 3.655806  | -0.716950 | C | -0.636270 | -3.539577 | 4.725616  |
| C | -2.115000 | 2.466249  | -1.423834 | C | -1.142619 | -3.592716 | 3.439074  |
| C | -2.537503 | 2.448608  | -2.807547 | H | -3.169835 | 4.514831  | 2.875927  |
| C | -2.537503 | 1.206820  | -3.524503 | H | -4.031870 | 4.429041  | 5.170770  |
| C | -2.115000 | 0.000000  | -2.847667 | H | -4.031870 | 2.262238  | 6.421544  |
| C | -1.692497 | -1.206820 | -3.524503 | H | -3.169835 | 0.232345  | 5.347771  |
| C | -1.692497 | -2.448608 | -2.807547 | H | -1.060165 | 4.747651  | -2.472254 |
| C | -2.115000 | -2.466249 | -1.423834 | H | -0.198130 | 6.692546  | -1.250943 |
| C | -2.537503 | -3.655806 | -0.716950 | H | -0.198130 | 6.692546  | 1.250943  |
| C | -2.537503 | -3.655806 | 0.716950  | H | -1.060165 | 4.747651  | 2.472254  |
| C | -2.115000 | -2.466249 | 1.423834  | H | -3.169835 | 0.232345  | -5.347771 |
| C | -1.692497 | -2.448608 | 2.807547  | H | -4.031870 | 2.262238  | -6.421544 |
| C | -1.692497 | -1.206820 | 3.524503  | H | -4.031870 | 4.429041  | -5.170770 |
| C | -2.115000 | 0.000000  | 2.847667  | H | -3.169835 | 4.514831  | -2.875927 |

|   |           |           |           |   |          |           |           |
|---|-----------|-----------|-----------|---|----------|-----------|-----------|
| H | -1.060165 | -4.514831 | -2.875927 | C | 3.304619 | 4.724691  | -1.396729 |
| H | -0.198130 | -4.429041 | -5.170770 | C | 3.863344 | 5.785202  | -0.703581 |
| H | -0.198130 | -2.262238 | -6.421544 | C | 3.863344 | 5.785202  | 0.703581  |
| H | -1.060165 | -0.232345 | -5.347771 | C | 3.304619 | 4.724691  | 1.396729  |
| H | -3.169835 | -4.747651 | 2.472254  | C | 1.165381 | 1.151351  | -4.790062 |
| H | -4.031870 | -6.692546 | 1.250943  | C | 0.606656 | 2.281665  | -5.362358 |
| H | -4.031870 | -6.692546 | -1.250943 | C | 0.606656 | 3.500587  | -4.659123 |
| H | -3.169835 | -4.747651 | -2.472254 | C | 1.165381 | 3.571653  | -3.394077 |
| H | -1.060165 | -0.232345 | 5.347771  | C | 3.304619 | -3.571653 | -3.394077 |
| H | -0.198130 | -2.262238 | 6.421544  | C | 3.863344 | -3.500587 | -4.659123 |
| H | -0.198130 | -4.429041 | 5.170770  | C | 3.863344 | -2.281665 | -5.362358 |
| H | -1.060165 | -4.514831 | 2.875927  | C | 3.304619 | -1.151351 | -4.790062 |

144

cf11, c-HBC\_homodimers with bowl depth: 1.07

|   |          |           |           |   |           |           |           |
|---|----------|-----------|-----------|---|-----------|-----------|-----------|
| C | 2.696320 | 3.639058  | 0.718044  | C | 3.304619  | -1.151351 | 4.790062  |
| C | 2.696320 | 3.639058  | -0.718044 | C | 3.863344  | -2.281665 | 5.362358  |
| C | 2.235000 | 2.462031  | -1.421454 | C | 3.863344  | -3.500587 | 4.659123  |
| C | 1.773680 | 2.441192  | -2.792638 | C | 3.304619  | -3.571653 | 3.394077  |
| C | 1.773680 | 1.197407  | -3.510444 | H | 1.074681  | 4.489091  | 2.821383  |
| C | 2.235000 | 0.000000  | -2.842357 | H | 0.124180  | 4.375892  | 5.086347  |
| C | 2.696320 | -1.197407 | -3.510444 | H | 0.124180  | 2.213221  | 6.333905  |
| C | 2.696320 | -2.441192 | -2.792638 | H | 1.074681  | 0.195490  | 5.296036  |
| C | 2.235000 | -2.462031 | -1.421454 | H | 3.395319  | 4.685905  | -2.477483 |
| C | 1.773680 | -3.639058 | -0.718044 | H | 4.345820  | 6.592538  | -1.248419 |
| C | 1.773680 | -3.639058 | 0.718044  | H | 4.345820  | 6.592538  | 1.248419  |
| C | 2.235000 | -2.462031 | 1.421454  | H | 3.395319  | 4.685905  | 2.477483  |
| C | 2.696320 | -2.441192 | 2.792638  | H | 1.074681  | 0.195490  | -5.296036 |
| C | 2.696320 | -1.197407 | 2.792638  | H | 0.124180  | 2.213221  | -6.333905 |
| C | 2.235000 | 0.000000  | 2.842357  | H | 0.124180  | 4.375892  | -5.086347 |
| C | 1.773680 | 1.197407  | 3.510444  | H | 1.074681  | 4.489091  | -2.821383 |
| C | 1.773680 | 2.441192  | 2.792638  | H | 3.395319  | -4.489091 | -2.821383 |
| C | 2.235000 | 2.462031  | 1.421454  | H | 4.345820  | -4.375892 | -5.086347 |
| C | 2.235000 | 1.243675  | 0.717977  | H | 4.345820  | -2.213221 | -6.333905 |
| C | 2.235000 | 1.243675  | -0.717977 | H | 3.395319  | -0.195490 | -5.296036 |
| C | 2.235000 | 0.000000  | -1.435841 | H | 1.074681  | -4.685905 | 2.477483  |
| C | 2.235000 | -1.243675 | -0.717977 | H | 0.124180  | -6.592538 | 1.248419  |
| C | 2.235000 | -1.243675 | 0.717977  | H | 0.124180  | -6.592538 | -1.248419 |
| C | 2.235000 | 0.000000  | 1.435841  | H | 1.074681  | -4.685905 | -2.477483 |
| C | 1.165381 | 3.571653  | 3.394077  | H | 3.395319  | -0.195490 | 5.296036  |
| C | 0.606656 | 3.500587  | 4.659123  | H | 4.345820  | -2.213221 | 6.333905  |
| C | 0.606656 | 2.281665  | 5.362358  | H | 4.345820  | -4.375892 | 5.086347  |
| C | 1.165381 | 1.151351  | 4.790062  | H | 3.395319  | -4.489091 | 2.821383  |
|   |          |           |           | C | -1.773680 | 3.639058  | 0.718044  |

|   |           |           |           |                                              |           |           |           |
|---|-----------|-----------|-----------|----------------------------------------------|-----------|-----------|-----------|
| C | -1.773680 | 3.639058  | -0.718044 | C                                            | -0.606656 | -3.500587 | 4.659123  |
| C | -2.235000 | 2.462031  | -1.421454 | C                                            | -1.165381 | -3.571653 | 3.394077  |
| C | -2.696320 | 2.441192  | -2.792638 | H                                            | -3.395319 | 4.489091  | 2.821383  |
| C | -2.696320 | 1.197407  | -3.510444 | H                                            | -4.345820 | 4.375892  | 5.086347  |
| C | -2.235000 | 0.000000  | -2.842357 | H                                            | -4.345820 | 2.213221  | 6.333905  |
| C | -1.773680 | -1.197407 | -3.510444 | H                                            | -3.395319 | 0.195490  | 5.296036  |
| C | -1.773680 | -2.441192 | -2.792638 | H                                            | -1.074681 | 4.685905  | -2.477483 |
| C | -2.235000 | -2.462031 | -1.421454 | H                                            | -0.124180 | 6.592538  | -1.248419 |
| C | -2.696320 | -3.639058 | -0.718044 | H                                            | -0.124180 | 6.592538  | 1.248419  |
| C | -2.696320 | -3.639058 | 0.718044  | H                                            | -1.074681 | 4.685905  | 2.477483  |
| C | -2.235000 | -2.462031 | 1.421454  | H                                            | -3.395319 | 0.195490  | -5.296036 |
| C | -1.773680 | -2.441192 | 2.792638  | H                                            | -4.345820 | 2.213221  | -6.333905 |
| C | -1.773680 | -1.197407 | 3.510444  | H                                            | -4.345820 | 4.375892  | -5.086347 |
| C | -2.235000 | 0.000000  | 2.842357  | H                                            | -3.395319 | 4.489091  | -2.821383 |
| C | -2.696320 | 1.197407  | 3.510444  | H                                            | -1.074681 | -4.489091 | -2.821383 |
| C | -2.696320 | 2.441192  | 2.792638  | H                                            | -0.124180 | -4.375892 | -5.086347 |
| C | -2.235000 | 2.462031  | 1.421454  | H                                            | -0.124180 | -2.213221 | -6.333905 |
| C | -2.235000 | 1.243675  | 0.717977  | H                                            | -1.074681 | -0.195490 | -5.296036 |
| C | -2.235000 | 1.243675  | -0.717977 | H                                            | -3.395319 | -4.685905 | 2.477483  |
| C | -2.235000 | 0.000000  | -1.435841 | H                                            | -4.345820 | -6.592538 | 1.248419  |
| C | -2.235000 | -1.243675 | -0.717977 | H                                            | -4.345820 | -6.592538 | -1.248419 |
| C | -2.235000 | -1.243675 | 0.717977  | H                                            | -3.395319 | -4.685905 | -2.477483 |
| C | -2.235000 | 0.000000  | 1.435841  | H                                            | -1.074681 | -0.195490 | 5.296036  |
| C | -3.304619 | 3.571653  | 3.394077  | H                                            | -0.124180 | -2.213221 | 6.333905  |
| C | -3.863344 | 3.500587  | 4.659123  | H                                            | -0.124180 | -4.375892 | 5.086347  |
| C | -3.863344 | 2.281665  | 5.362358  | H                                            | -1.074681 | -4.489091 | 2.821383  |
| C | -3.304619 | 1.151351  | 4.790062  |                                              |           |           |           |
| C | -1.165381 | 4.724691  | -1.396729 |                                              |           |           |           |
| C | -0.606656 | 5.785202  | -0.703581 | 144                                          |           |           |           |
| C | -0.606656 | 5.785202  | 0.703581  | cf12, c-HBC_homodimers with bowl depth: 1.17 |           |           |           |
| C | -1.165381 | 4.724691  | 1.396729  |                                              |           |           |           |
| C | -3.304619 | 1.151351  | -4.790062 | C                                            | 2.874903  | 3.622018  | 0.719085  |
| C | -3.863344 | 2.281665  | -5.362358 | C                                            | 2.874903  | 3.622018  | -0.719085 |
| C | -3.863344 | 3.500587  | -4.659123 | C                                            | 2.375000  | 2.458433  | -1.419277 |
| C | -3.304619 | 3.571653  | -3.394077 | C                                            | 1.875097  | 2.433585  | -2.777166 |
| C | -1.165381 | -3.571653 | -3.394077 | C                                            | 1.875097  | 1.188048  | -3.496066 |
| C | -0.606656 | -3.500587 | -4.659123 | C                                            | 2.375000  | 0.000000  | -2.838326 |
| C | -0.606656 | -2.281665 | -5.362358 | C                                            | 2.874903  | -1.188048 | -3.496066 |
| C | -1.165381 | -1.151351 | -4.790062 | C                                            | 2.874903  | -2.433585 | -2.777166 |
| C | -3.304619 | -4.724691 | 1.396729  | C                                            | 2.375000  | -2.458433 | -1.419277 |
| C | -3.863344 | -5.785202 | 0.703581  | C                                            | 1.875097  | -3.622018 | -0.719085 |
| C | -3.863344 | -5.785202 | -0.703581 | C                                            | 1.875097  | -3.622018 | 0.719085  |
| C | -3.304619 | -4.724691 | -1.396729 | C                                            | 2.375000  | -2.458433 | 1.419277  |
| C | -1.165381 | -1.151351 | 4.790062  | C                                            | 2.874903  | -2.433585 | 2.777166  |
| C | -0.606656 | -2.281665 | 5.362358  | C                                            | 2.874903  | -1.188048 | 3.496066  |

|   |          |           |           |   |           |           |           |
|---|----------|-----------|-----------|---|-----------|-----------|-----------|
| C | 2.375000 | 0.000000  | 2.838326  | H | 1.109198  | 4.459676  | -2.764373 |
| C | 1.875097 | 1.188048  | 3.496066  | H | 3.640802  | -4.459676 | -2.764373 |
| C | 1.875097 | 2.433585  | 2.777166  | H | 4.685753  | -4.317751 | -4.987444 |
| C | 2.375000 | 2.458433  | 1.419277  | H | 4.685753  | -2.157766 | -6.233721 |
| C | 2.375000 | 1.241653  | 0.716816  | H | 3.640802  | -0.162013 | -5.242908 |
| C | 2.375000 | 1.241653  | -0.716816 | H | 1.109198  | -4.622907 | 2.480457  |
| C | 2.375000 | 0.000000  | -1.433348 | H | 0.064247  | -6.478085 | 1.246964  |
| C | 2.375000 | -1.241653 | -0.716816 | H | 0.064247  | -6.478085 | -1.246964 |
| C | 2.375000 | -1.241653 | 0.716816  | H | 1.109198  | -4.622907 | -2.480457 |
| C | 2.375000 | 0.000000  | 1.433348  | H | 3.640802  | -0.162013 | 5.242908  |
| C | 1.208143 | 3.547605  | 3.345992  | H | 4.685753  | -2.157766 | 6.233721  |
| C | 0.593850 | 3.458236  | 4.584555  | H | 4.685753  | -4.317751 | 4.987444  |
| C | 0.593850 | 2.239210  | 5.288008  | H | 3.640802  | -4.459676 | 2.764373  |
| C | 1.208143 | 1.122428  | 4.745123  | C | -1.875097 | 3.622018  | 0.719085  |
| C | 3.541857 | 4.671374  | -1.399719 | C | -1.875097 | 3.622018  | -0.719085 |
| C | 4.156150 | 5.699690  | -0.703683 | C | -2.375000 | 2.458433  | -1.419277 |
| C | 4.156150 | 5.699690  | 0.703683  | C | -2.874903 | 2.433585  | -2.777166 |
| C | 3.541857 | 4.671374  | 1.399719  | C | -2.874903 | 1.188048  | -3.496066 |
| C | 1.208143 | 1.122428  | -4.745123 | C | -2.375000 | 0.000000  | -2.838326 |
| C | 0.593850 | 2.239210  | -5.288008 | C | -1.875097 | -1.188048 | -3.496066 |
| C | 0.593850 | 3.458236  | -4.584555 | C | -1.875097 | -2.433585 | -2.777166 |
| C | 1.208143 | 3.547605  | -3.345992 | C | -2.375000 | -2.458433 | -1.419277 |
| C | 3.541857 | -3.547605 | -3.345992 | C | -2.874903 | -3.622018 | -0.719085 |
| C | 4.156150 | -3.458236 | -4.584555 | C | -2.874903 | -3.622018 | 0.719085  |
| C | 4.156150 | -2.239210 | -5.288008 | C | -2.375000 | -2.458433 | 1.419277  |
| C | 3.541857 | -1.122428 | -4.745123 | C | -1.875097 | -2.433585 | 2.777166  |
| C | 1.208143 | -4.671374 | 1.399719  | C | -1.875097 | -1.188048 | 3.496066  |
| C | 0.593850 | -5.699690 | 0.703683  | C | -2.375000 | 0.000000  | 2.838326  |
| C | 0.593850 | -5.699690 | -0.703683 | C | -2.874903 | 1.188048  | 3.496066  |
| C | 1.208143 | -4.671374 | -1.399719 | C | -2.874903 | 2.433585  | 2.777166  |
| C | 3.541857 | -1.122428 | 4.745123  | C | -2.375000 | 2.458433  | 1.419277  |
| C | 4.156150 | -2.239210 | 5.288008  | C | -2.375000 | 1.241653  | 0.716816  |
| C | 4.156150 | -3.458236 | 4.584555  | C | -2.375000 | 1.241653  | -0.716816 |
| C | 3.541857 | -3.547605 | 3.345992  | C | -2.375000 | 0.000000  | -1.433348 |
| H | 1.109198 | 4.459676  | 2.764373  | C | -2.375000 | -1.241653 | -0.716816 |
| H | 0.064247 | 4.317751  | 4.987444  | C | -2.375000 | -1.241653 | 0.716816  |
| H | 0.064247 | 2.157766  | 6.233721  | C | -2.375000 | 0.000000  | 1.433348  |
| H | 1.109198 | 0.162013  | 5.242908  | C | -3.541857 | 3.547605  | 3.345992  |
| H | 3.640802 | 4.622907  | -2.480457 | C | -4.156150 | 3.458236  | 4.584555  |
| H | 4.685753 | 6.478085  | -1.246964 | C | -4.156150 | 2.239210  | 5.288008  |
| H | 4.685753 | 6.478085  | 1.246964  | C | -3.541857 | 1.122428  | 4.745123  |
| H | 3.640802 | 4.622907  | 2.480457  | C | -1.208143 | 4.671374  | -1.399719 |
| H | 1.109198 | 0.162013  | -5.242908 | C | -0.593850 | 5.699690  | -0.703683 |
| H | 0.064247 | 2.157766  | -6.233721 | C | -0.593850 | 5.699690  | 0.703683  |
| H | 0.064247 | 4.317751  | -4.987444 | C | -1.208143 | 4.671374  | 1.399719  |



|   |           |           |           |   |          |           |           |
|---|-----------|-----------|-----------|---|----------|-----------|-----------|
| C | -3.541857 | 1.122428  | -4.745123 | C | 3.049256 | 3.605395  | 0.720380  |
| C | -4.156150 | 2.239210  | -5.288008 | C | 3.049256 | 3.605395  | -0.720380 |
| C | -4.156150 | 3.458236  | -4.584555 | C | 2.510000 | 2.456228  | -1.418051 |
| C | -3.541857 | 3.547605  | -3.345992 | C | 1.970744 | 2.426441  | -2.762191 |
| C | -1.208143 | -3.547605 | -3.345992 | C | 1.970744 | 1.178533  | -3.482296 |
| C | -0.593850 | -3.458236 | -4.584555 | C | 2.510000 | 0.000000  | -2.835579 |
| C | -0.593850 | -2.239210 | -5.288008 | C | 3.049256 | -1.178533 | -3.482296 |
| C | -1.208143 | -1.122428 | -4.745123 | C | 3.049256 | -2.426441 | -2.762191 |
| C | -3.541857 | -4.671374 | 1.399719  | C | 2.510000 | -2.456228 | -1.418051 |
| C | -4.156150 | -5.699690 | 0.703683  | C | 1.970744 | -3.605395 | -0.720380 |
| C | -4.156150 | -5.699690 | -0.703683 | C | 1.970744 | -3.605395 | 0.720380  |
| C | -3.541857 | -4.671374 | -1.399719 | C | 2.510000 | -2.456228 | 1.418051  |
| C | -1.208143 | -1.122428 | 4.745123  | C | 3.049256 | -2.426441 | 2.762191  |
| C | -0.593850 | -2.239210 | 5.288008  | C | 3.049256 | -1.178533 | 3.482296  |
| C | -0.593850 | -3.458236 | 4.584555  | C | 2.510000 | 0.000000  | 2.835579  |
| C | -1.208143 | -3.547605 | 3.345992  | C | 1.970744 | 1.178533  | 3.482296  |
| H | -3.640802 | 4.459676  | 2.764373  | C | 1.970744 | 2.426441  | 2.762191  |
| H | -4.685753 | 4.317751  | 4.987444  | C | 2.510000 | 2.456228  | 1.418051  |
| H | -4.685753 | 2.157766  | 6.233721  | C | 2.510000 | 1.240315  | 0.715998  |
| H | -3.640802 | 0.162013  | 5.242908  | C | 2.510000 | 1.240315  | -0.715998 |
| H | -1.109198 | 4.622907  | -2.480457 | C | 2.510000 | 0.000000  | -1.431769 |
| H | -0.064247 | 6.478085  | -1.246964 | C | 2.510000 | -1.240315 | -0.715998 |
| H | -0.064247 | 6.478085  | 1.246964  | C | 2.510000 | -1.240315 | 0.715998  |
| H | -1.109198 | 4.622907  | 2.480457  | C | 2.510000 | 0.000000  | 1.431769  |
| H | -3.640802 | 0.162013  | -5.242908 | C | 1.245905 | 3.521268  | 3.297863  |
| H | -4.685753 | 2.157766  | -6.233721 | C | 0.579254 | 3.413542  | 4.508142  |
| H | -4.685753 | 4.317751  | -4.987444 | C | 0.579254 | 2.194654  | 5.211194  |
| H | -3.640802 | 4.459676  | -2.764373 | C | 1.245905 | 1.093371  | 4.697928  |
| H | -1.109198 | -4.459676 | -2.764373 | C | 3.774095 | 4.616242  | -1.401147 |
| H | -0.064247 | -4.317751 | -4.987444 | C | 4.440746 | 5.611058  | -0.703523 |
| H | -0.064247 | -2.157766 | -6.233721 | C | 4.440746 | 5.611058  | 0.703523  |
| H | -1.109198 | -0.162013 | -5.242908 | C | 3.774095 | 4.616242  | 1.401147  |
| H | -3.640802 | -4.622907 | 2.480457  | C | 1.245905 | 1.093371  | -4.697928 |
| H | -4.685753 | -6.478085 | 1.246964  | C | 0.579254 | 2.194654  | -5.211194 |
| H | -4.685753 | -6.478085 | -1.246964 | C | 0.579254 | 3.413542  | -4.508142 |
| H | -3.640802 | -4.622907 | -2.480457 | C | 1.245905 | 3.521268  | -3.297863 |
| H | -1.109198 | -0.162013 | 5.242908  | C | 3.774095 | -3.521268 | -3.297863 |
| H | -0.064247 | -2.157766 | 6.233721  | C | 4.440746 | -3.413542 | -4.508142 |
| H | -0.064247 | -4.317751 | 4.987444  | C | 4.440746 | -2.194654 | -5.211194 |
| H | -1.109198 | -4.459676 | 2.764373  | C | 3.774095 | -1.093371 | -4.697928 |
|   |           |           |           | C | 1.245905 | -4.616242 | 1.401147  |
|   |           |           |           | C | 0.579254 | -5.611058 | 0.703523  |
|   |           |           |           | C | 0.579254 | -5.611058 | -0.703523 |
|   |           |           |           | C | 1.245905 | -4.616242 | -1.401147 |
|   |           |           |           | C | 3.774095 | -1.093371 | 4.697928  |

144

cf13, c-HBC\_homodimers with bowl depth: 1.26

|   |           |           |           |   |           |           |           |
|---|-----------|-----------|-----------|---|-----------|-----------|-----------|
| C | 4.440746  | -2.194654 | 5.211194  | C | -2.510000 | 1.240315  | 0.715998  |
| C | 4.440746  | -3.413542 | 4.508142  | C | -2.510000 | 1.240315  | -0.715998 |
| C | 3.774095  | -3.521268 | 3.297863  | C | -2.510000 | 0.000000  | -1.431769 |
| H | 1.138714  | 4.429087  | 2.709979  | C | -2.510000 | -1.240315 | -0.715998 |
| H | 0.006468  | 4.257091  | 4.884800  | C | -2.510000 | -1.240315 | 0.715998  |
| H | 0.006468  | 2.098110  | 6.129927  | C | -2.510000 | 0.000000  | 1.431769  |
| H | 1.138714  | 0.129289  | 5.188119  | C | -3.774095 | 3.521268  | 3.297863  |
| H | 3.881286  | 4.559579  | -2.481229 | C | -4.440746 | 3.413542  | 4.508142  |
| H | 5.013532  | 6.358592  | -1.246305 | C | -4.440746 | 2.194654  | 5.211194  |
| H | 5.013532  | 6.358592  | 1.246305  | C | -3.774095 | 1.093371  | 4.697928  |
| H | 3.881286  | 4.559579  | 2.481229  | C | -1.245905 | 4.616242  | -1.401147 |
| H | 1.138714  | 0.129289  | -5.188119 | C | -0.579254 | 5.611058  | -0.703523 |
| H | 0.006468  | 2.098110  | -6.129927 | C | -0.579254 | 5.611058  | 0.703523  |
| H | 0.006468  | 4.257091  | -4.884800 | C | -1.245905 | 4.616242  | 1.401147  |
| H | 1.138714  | 4.429087  | -2.709979 | C | -3.774095 | 1.093371  | -4.697928 |
| H | 3.881286  | -4.429087 | -2.709979 | C | -4.440746 | 2.194654  | -5.211194 |
| H | 5.013532  | -4.257091 | -4.884800 | C | -4.440746 | 3.413542  | -4.508142 |
| H | 5.013532  | -2.098110 | -6.129927 | C | -3.774095 | 3.521268  | -3.297863 |
| H | 3.881286  | -0.129289 | -5.188119 | C | -1.245905 | -3.521268 | -3.297863 |
| H | 1.138714  | -4.559579 | 2.481229  | C | -0.579254 | -3.413542 | -4.508142 |
| H | 0.006468  | -6.358592 | 1.246305  | C | -0.579254 | -2.194654 | -5.211194 |
| H | 0.006468  | -6.358592 | -1.246305 | C | -1.245905 | -1.093371 | -4.697928 |
| H | 1.138714  | -4.559579 | -2.481229 | C | -3.774095 | -4.616242 | 1.401147  |
| H | 3.881286  | -0.129289 | 5.188119  | C | -4.440746 | -5.611058 | 0.703523  |
| H | 5.013532  | -2.098110 | 6.129927  | C | -4.440746 | -5.611058 | -0.703523 |
| H | 5.013532  | -4.257091 | 4.884800  | C | -3.774095 | -4.616242 | -1.401147 |
| H | 3.881286  | -4.429087 | 2.709979  | C | -1.245905 | -1.093371 | 4.697928  |
| C | -1.970744 | 3.605395  | 0.720380  | C | -0.579254 | -2.194654 | 5.211194  |
| C | -1.970744 | 3.605395  | -0.720380 | C | -0.579254 | -3.413542 | 4.508142  |
| C | -2.510000 | 2.456228  | -1.418051 | C | -1.245905 | -3.521268 | 3.297863  |
| C | -3.049256 | 2.426441  | -2.762191 | H | -3.881286 | 4.429087  | 2.709979  |
| C | -3.049256 | 1.178533  | -3.482296 | H | -5.013532 | 4.257091  | 4.884800  |
| C | -2.510000 | 0.000000  | -2.835579 | H | -5.013532 | 2.098110  | 6.129927  |
| C | -1.970744 | -1.178533 | -3.482296 | H | -3.881286 | 0.129289  | 5.188119  |
| C | -1.970744 | -2.426441 | -2.762191 | H | -1.138714 | 4.559579  | -2.481229 |
| C | -2.510000 | -2.456228 | -1.418051 | H | -0.006468 | 6.358592  | -1.246305 |
| C | -3.049256 | -3.605395 | -0.720380 | H | -0.006468 | 6.358592  | 1.246305  |
| C | -3.049256 | -3.605395 | 0.720380  | H | -1.138714 | 4.559579  | 2.481229  |
| C | -2.510000 | -2.456228 | 1.418051  | H | -3.881286 | 0.129289  | -5.188119 |
| C | -1.970744 | -2.426441 | 2.762191  | H | -5.013532 | 2.098110  | -6.129927 |
| C | -1.970744 | -1.178533 | 3.482296  | H | -5.013532 | 4.257091  | -4.884800 |
| C | -2.510000 | 0.000000  | 2.835579  | H | -3.881286 | 4.429087  | -2.709979 |
| C | -3.049256 | 1.178533  | 3.482296  | H | -1.138714 | -4.429087 | -2.709979 |
| C | -3.049256 | 2.426441  | 2.762191  | H | -0.006468 | -4.257091 | -4.884800 |
| C | -2.510000 | 2.456228  | 1.418051  | H | -0.006468 | -2.098110 | -6.129927 |

|   |           |           |           |
|---|-----------|-----------|-----------|
| H | -1.138714 | -0.129289 | -5.188119 |
| H | -3.881286 | -4.559579 | 2.481229  |
| H | -5.013532 | -6.358592 | 1.246305  |
| H | -5.013532 | -6.358592 | -1.246305 |
| H | -3.881286 | -4.559579 | -2.481229 |
| H | -1.138714 | -0.129289 | 5.188119  |
| H | -0.006468 | -2.098110 | 6.129927  |
| H | -0.006468 | -4.257091 | 4.884800  |
| H | -1.138714 | -4.429087 | 2.709979  |

144

cf14, c-HBC\_homodimers with bowl depth: 1.36

|   |          |           |           |
|---|----------|-----------|-----------|
| C | 3.234456 | 3.587945  | 0.721714  |
| C | 3.234456 | 3.587945  | -0.721714 |
| C | 2.655000 | 2.454289  | -1.416911 |
| C | 2.075544 | 2.418869  | -2.746292 |
| C | 2.075544 | 1.168767  | -3.468029 |
| C | 2.655000 | 0.000000  | -2.833756 |
| C | 3.234456 | -1.168767 | -3.468029 |
| C | 3.234456 | -2.418869 | -2.746292 |
| C | 2.655000 | -2.454289 | -1.416911 |
| C | 2.075544 | -3.587945 | -0.721714 |
| C | 2.075544 | -3.587945 | 0.721714  |
| C | 2.655000 | -2.454289 | 1.416911  |
| C | 3.234456 | -2.418869 | 2.746292  |
| C | 3.234456 | -1.168767 | 3.468029  |
| C | 2.655000 | 0.000000  | 2.833756  |
| C | 2.075544 | 1.168767  | 3.468029  |
| C | 2.075544 | 2.418869  | 2.746292  |
| C | 2.655000 | 2.454289  | 1.416911  |
| C | 2.655000 | 1.239148  | 0.715383  |
| C | 2.655000 | 1.239148  | -0.715383 |
| C | 2.655000 | 0.000000  | -1.430689 |
| C | 2.655000 | -1.239148 | -0.715383 |
| C | 2.655000 | -1.239148 | 0.715383  |
| C | 2.655000 | 0.000000  | 1.430689  |
| C | 1.293667 | 3.492607  | 3.245605  |
| C | 0.575834 | 3.366327  | 4.424804  |
| C | 0.575834 | 2.148120  | 5.127952  |
| C | 1.293667 | 1.063941  | 4.647319  |
| C | 4.016333 | 4.557030  | -1.402022 |
| C | 4.734166 | 5.515288  | -0.703255 |
| C | 4.734166 | 5.515288  | 0.703255  |

|   |           |           |           |
|---|-----------|-----------|-----------|
| C | 4.016333  | 4.557030  | 1.402022  |
| C | 1.293667  | 1.063941  | -4.647319 |
| C | 0.575834  | 2.148120  | -5.127952 |
| C | 0.575834  | 3.366327  | -4.424804 |
| C | 1.293667  | 3.492607  | -3.245605 |
| C | 4.016333  | -3.492607 | -3.245605 |
| C | 4.734166  | -3.366327 | -4.424804 |
| C | 4.734166  | -2.148120 | -5.127952 |
| C | 4.016333  | -1.063941 | -4.647319 |
| C | 1.293667  | -4.557030 | 1.402022  |
| C | 0.575834  | -5.515288 | 0.703255  |
| C | 0.575834  | -5.515288 | -0.703255 |
| C | 1.293667  | -4.557030 | -1.402022 |
| C | 4.016333  | -1.063941 | 4.647319  |
| C | 4.734166  | -2.148120 | 5.127952  |
| C | 4.734166  | -3.366327 | 4.424804  |
| C | 4.016333  | -3.492607 | 3.245605  |
| H | 1.178231  | 4.395381  | 2.650807  |
| H | -0.038746 | 4.193065  | 4.771612  |
| H | -0.038746 | 2.034811  | 6.017306  |
| H | 1.178231  | 0.097072  | 5.130953  |
| H | 4.131769  | 4.492529  | -2.481171 |
| H | 5.348746  | 6.228819  | -1.246054 |
| H | 5.348746  | 6.228819  | 1.246054  |
| H | 4.131769  | 4.492529  | 2.481171  |
| H | 1.178231  | 0.097072  | -5.130953 |
| H | -0.038746 | 2.034811  | -6.017306 |
| H | -0.038746 | 4.193065  | -4.771612 |
| H | 1.178231  | 4.395381  | -2.650807 |
| H | 4.131769  | -4.395381 | -2.650807 |
| H | 5.348746  | -4.193065 | -4.771612 |
| H | 5.348746  | -2.034811 | -6.017306 |
| H | 4.131769  | -0.097072 | -5.130953 |
| H | 1.178231  | -4.492529 | 2.481171  |
| H | -0.038746 | -6.228819 | 1.246054  |
| H | -0.038746 | -6.228819 | -1.246054 |
| H | 1.178231  | -4.492529 | -2.481171 |
| H | 4.131769  | -0.097072 | 5.130953  |
| H | 5.348746  | -2.034811 | 6.017306  |
| H | 5.348746  | -4.193065 | 4.771612  |
| H | 4.131769  | -4.395381 | 2.650807  |
| C | -2.075544 | 3.587945  | 0.721714  |
| C | -2.075544 | 3.587945  | -0.721714 |
| C | -2.655000 | 2.454289  | -1.416911 |
| C | -2.655000 | 2.454289  | 1.416911  |
| C | -3.234456 | 2.418869  | -2.746292 |
| C | -3.234456 | 2.418869  | 2.746292  |

|   |           |           |           |                                              |           |           |           |
|---|-----------|-----------|-----------|----------------------------------------------|-----------|-----------|-----------|
| C | -3.234456 | 1.168767  | -3.468029 | H                                            | -5.348746 | 4.193065  | 4.771612  |
| C | -2.655000 | 0.000000  | -2.833756 | H                                            | -5.348746 | 2.034811  | 6.017306  |
| C | -2.075544 | -1.168767 | -3.468029 | H                                            | -4.131769 | 0.097072  | 5.130953  |
| C | -2.075544 | -2.418869 | -2.746292 | H                                            | -1.178231 | 4.492529  | -2.481171 |
| C | -2.655000 | -2.454289 | -1.416911 | H                                            | 0.038746  | 6.228819  | -1.246054 |
| C | -3.234456 | -3.587945 | -0.721714 | H                                            | 0.038746  | 6.228819  | 1.246054  |
| C | -3.234456 | -3.587945 | 0.721714  | H                                            | -1.178231 | 4.492529  | 2.481171  |
| C | -2.655000 | -2.454289 | 1.416911  | H                                            | -4.131769 | 0.097072  | -5.130953 |
| C | -2.075544 | -2.418869 | 2.746292  | H                                            | -5.348746 | 2.034811  | -6.017306 |
| C | -2.075544 | -1.168767 | 3.468029  | H                                            | -5.348746 | 4.193065  | -4.771612 |
| C | -2.655000 | 0.000000  | 2.833756  | H                                            | -4.131769 | 4.395381  | -2.650807 |
| C | -3.234456 | 1.168767  | 3.468029  | H                                            | -1.178231 | -4.395381 | -2.650807 |
| C | -3.234456 | 2.418869  | 2.746292  | H                                            | 0.038746  | -4.193065 | -4.771612 |
| C | -2.655000 | 2.454289  | 1.416911  | H                                            | 0.038746  | -2.034811 | -6.017306 |
| C | -2.655000 | 1.239148  | 0.715383  | H                                            | -1.178231 | -0.097072 | -5.130953 |
| C | -2.655000 | 1.239148  | -0.715383 | H                                            | -4.131769 | -4.492529 | 2.481171  |
| C | -2.655000 | 0.000000  | -1.430689 | H                                            | -5.348746 | -6.228819 | 1.246054  |
| C | -2.655000 | -1.239148 | -0.715383 | H                                            | -5.348746 | -6.228819 | -1.246054 |
| C | -2.655000 | -1.239148 | 0.715383  | H                                            | -4.131769 | -4.492529 | -2.481171 |
| C | -2.655000 | 0.000000  | 1.430689  | H                                            | -1.178231 | -0.097072 | 5.130953  |
| C | -4.016333 | 3.492607  | 3.245605  | H                                            | 0.038746  | -2.034811 | 6.017306  |
| C | -4.734166 | 3.366327  | 4.424804  | H                                            | 0.038746  | -4.193065 | 4.771612  |
| C | -4.734166 | 2.148120  | 5.127952  | H                                            | -1.178231 | -4.395381 | 2.650807  |
| C | -4.016333 | 1.063941  | 4.647319  |                                              |           |           |           |
| C | -1.293667 | 4.557030  | -1.402022 |                                              |           |           |           |
| C | -0.575834 | 5.515288  | -0.703255 |                                              |           |           |           |
| C | -0.575834 | 5.515288  | 0.703255  | 144                                          |           |           |           |
| C | -1.293667 | 4.557030  | 1.402022  | cf15, c-HBC_homodimers with bowl depth: 1.46 |           |           |           |
| C | -4.016333 | 1.063941  | -4.647319 | C                                            | 3.420602  | 3.569082  | 0.723231  |
| C | -4.734166 | 2.148120  | -5.127952 | C                                            | 3.420602  | 3.569082  | -0.723231 |
| C | -4.734166 | 3.366327  | -4.424804 | C                                            | 2.800000  | 2.452588  | -1.415951 |
| C | -4.016333 | 3.492607  | -3.245605 | C                                            | 2.179398  | 2.410719  | -2.729199 |
| C | -1.293667 | -3.492607 | -3.245605 | C                                            | 2.179398  | 1.157997  | -3.452525 |
| C | -0.575834 | -3.366327 | -4.424804 | C                                            | 2.800000  | 0.000000  | -2.831871 |
| C | -0.575834 | -2.148120 | -5.127952 | C                                            | 3.420602  | -1.157997 | -3.452525 |
| C | -1.293667 | -1.063941 | -4.647319 | C                                            | 3.420602  | -2.410719 | -2.729199 |
| C | -4.016333 | -4.557030 | 1.402022  | C                                            | 2.800000  | -2.452588 | -1.415951 |
| C | -4.734166 | -5.515288 | 0.703255  | C                                            | 2.179398  | -3.569082 | -0.723231 |
| C | -4.734166 | -5.515288 | -0.703255 | C                                            | 2.179398  | -3.569082 | 0.723231  |
| C | -4.016333 | -4.557030 | -1.402022 | C                                            | 2.800000  | -2.452588 | 1.415951  |
| C | -1.293667 | -1.063941 | 4.647319  | C                                            | 3.420602  | -2.410719 | 2.729199  |
| C | -0.575834 | -2.148120 | 5.127952  | C                                            | 3.420602  | -1.157997 | 3.452525  |
| C | -0.575834 | -3.366327 | 4.424804  | C                                            | 2.800000  | 0.000000  | 2.831871  |
| C | -1.293667 | -3.492607 | 3.245605  | C                                            | 2.179398  | 1.157997  | 3.452525  |
| H | -4.131769 | 4.395381  | 2.650807  | C                                            | 2.179398  | 2.410719  | 2.729199  |

|   |           |           |           |   |           |           |           |
|---|-----------|-----------|-----------|---|-----------|-----------|-----------|
| C | 2.800000  | 2.452588  | 1.415951  | H | 5.680742  | -1.964996 | -5.895406 |
| C | 2.800000  | 1.238078  | 0.714775  | H | 4.382253  | -0.061339 | -5.067512 |
| C | 2.800000  | 1.238078  | -0.714775 | H | 1.217747  | -4.419424 | 2.480657  |
| C | 2.800000  | 0.000000  | -1.429510 | H | -0.080742 | -6.088115 | 1.245627  |
| C | 2.800000  | -1.238078 | -0.714775 | H | -0.080742 | -6.088115 | -1.245627 |
| C | 2.800000  | -1.238078 | 0.714775  | H | 1.217747  | -4.419424 | -2.480657 |
| C | 2.800000  | 0.000000  | 1.429510  | H | 4.382253  | -0.061339 | 5.067512  |
| C | 1.341429  | 3.460759  | 3.189520  | H | 5.680742  | -1.964996 | 5.895406  |
| C | 0.573880  | 3.314193  | 4.334928  | H | 5.680742  | -4.122751 | 4.649816  |
| C | 0.573880  | 2.096728  | 5.037721  | H | 4.382253  | -4.358006 | 2.587502  |
| C | 1.341429  | 1.031534  | 4.591870  | C | -2.179398 | 3.569082  | 0.723231  |
| C | 4.258571  | 4.492509  | -1.402615 | C | -2.179398 | 3.569082  | -0.723231 |
| C | 5.026120  | 5.411118  | -0.702854 | C | -2.800000 | 2.452588  | -1.415951 |
| C | 5.026120  | 5.411118  | 0.702854  | C | -3.420602 | 2.410719  | -2.729199 |
| C | 4.258571  | 4.492509  | 1.402615  | C | -3.420602 | 1.157997  | -3.452525 |
| C | 1.341429  | 1.031534  | -4.591870 | C | -2.800000 | 0.000000  | -2.831871 |
| C | 0.573880  | 2.096728  | -5.037721 | C | -2.179398 | -1.157997 | -3.452525 |
| C | 0.573880  | 3.314193  | -4.334928 | C | -2.179398 | -2.410719 | -2.729199 |
| C | 1.341429  | 3.460759  | -3.189520 | C | -2.800000 | -2.452588 | -1.415951 |
| C | 4.258571  | -3.460759 | -3.189520 | C | -3.420602 | -3.569082 | -0.723231 |
| C | 5.026120  | -3.314193 | -4.334928 | C | -3.420602 | -3.569082 | 0.723231  |
| C | 5.026120  | -2.096728 | -5.037721 | C | -2.800000 | -2.452588 | 1.415951  |
| C | 4.258571  | -1.031534 | -4.591870 | C | -2.179398 | -2.410719 | 2.729199  |
| C | 1.341429  | -4.492509 | 1.402615  | C | -2.179398 | -1.157997 | 3.452525  |
| C | 0.573880  | -5.411118 | 0.702854  | C | -2.800000 | 0.000000  | 2.831871  |
| C | 0.573880  | -5.411118 | -0.702854 | C | -3.420602 | 1.157997  | 3.452525  |
| C | 1.341429  | -4.492509 | -1.402615 | C | -3.420602 | 2.410719  | 2.729199  |
| C | 4.258571  | -1.031534 | 4.591870  | C | -2.800000 | 2.452588  | 1.415951  |
| C | 5.026120  | -2.096728 | 5.037721  | C | -2.800000 | 1.238078  | 0.714775  |
| C | 5.026120  | -3.314193 | 4.334928  | C | -2.800000 | 1.238078  | -0.714775 |
| C | 4.258571  | -3.460759 | 3.189520  | C | -2.800000 | 0.000000  | -1.429510 |
| H | 1.217747  | 4.358006  | 2.587502  | C | -2.800000 | -1.238078 | -0.714775 |
| H | -0.080742 | 4.122751  | 4.649816  | C | -2.800000 | -1.238078 | 0.714775  |
| H | -0.080742 | 1.964996  | 5.895406  | C | -2.800000 | 0.000000  | 1.429510  |
| H | 1.217747  | 0.061339  | 5.067512  | C | -4.258571 | 3.460759  | 3.189520  |
| H | 4.382253  | 4.419424  | -2.480657 | C | -5.026120 | 3.314193  | 4.334928  |
| H | 5.680742  | 6.088115  | -1.245627 | C | -5.026120 | 2.096728  | 5.037721  |
| H | 5.680742  | 6.088115  | 1.245627  | C | -4.258571 | 1.031534  | 4.591870  |
| H | 4.382253  | 4.419424  | 2.480657  | C | -1.341429 | 4.492509  | -1.402615 |
| H | 1.217747  | 0.061339  | -5.067512 | C | -0.573880 | 5.411118  | -0.702854 |
| H | -0.080742 | 1.964996  | -5.895406 | C | -0.573880 | 5.411118  | 0.702854  |
| H | -0.080742 | 4.122751  | -4.649816 | C | -1.341429 | 4.492509  | 1.402615  |
| H | 1.217747  | 4.358006  | -2.587502 | C | -4.258571 | 1.031534  | -4.591870 |
| H | 4.382253  | -4.358006 | -2.587502 | C | -5.026120 | 2.096728  | -5.037721 |
| H | 5.680742  | -4.122751 | -4.649816 | C | -5.026120 | 3.314193  | -4.334928 |

|   |           |           |           |   |          |           |           |
|---|-----------|-----------|-----------|---|----------|-----------|-----------|
| C | -4.258571 | 3.460759  | -3.189520 | C | 2.291803 | 2.401820  | -2.710471 |
| C | -1.341429 | -3.460759 | -3.189520 | C | 2.291803 | 1.146238  | -3.435471 |
| C | -0.573880 | -3.314193 | -4.334928 | C | 2.955000 | 0.000000  | -2.829997 |
| C | -0.573880 | -2.096728 | -5.037721 | C | 3.618197 | -1.146238 | -3.435471 |
| C | -1.341429 | -1.031534 | -4.591870 | C | 3.618197 | -2.401820 | -2.710471 |
| C | -4.258571 | -4.492509 | 1.402615  | C | 2.955000 | -2.451021 | -1.415072 |
| C | -5.026120 | -5.411118 | 0.702854  | C | 2.291803 | -3.548373 | -0.724881 |
| C | -5.026120 | -5.411118 | -0.702854 | C | 2.291803 | -3.548373 | 0.724881  |
| C | -4.258571 | -4.492509 | -1.402615 | C | 2.955000 | -2.451021 | 1.415072  |
| C | -1.341429 | -1.031534 | 4.591870  | C | 3.618197 | -2.401820 | 2.710471  |
| C | -0.573880 | -2.096728 | 5.037721  | C | 3.618197 | -1.146238 | 3.435471  |
| C | -0.573880 | -3.314193 | 4.334928  | C | 2.955000 | 0.000000  | 2.829997  |
| C | -1.341429 | -3.460759 | 3.189520  | C | 2.291803 | 1.146238  | 3.435471  |
| H | -4.382253 | 4.358006  | 2.587502  | C | 2.291803 | 2.401820  | 2.710471  |
| H | -5.680742 | 4.122751  | 4.649816  | C | 2.955000 | 2.451021  | 1.415072  |
| H | -5.680742 | 1.964996  | 5.895406  | C | 2.955000 | 1.237031  | 0.714145  |
| H | -4.382253 | 0.061339  | 5.067512  | C | 2.955000 | 1.237031  | -0.714145 |
| H | -1.217747 | 4.419424  | -2.480657 | C | 2.955000 | 0.000000  | -1.428285 |
| H | 0.080742  | 6.088115  | -1.245627 | C | 2.955000 | -1.237031 | -0.714145 |
| H | 0.080742  | 6.088115  | 1.245627  | C | 2.955000 | -1.237031 | 0.714145  |
| H | -1.217747 | 4.419424  | 2.480657  | C | 2.955000 | 0.000000  | 1.428285  |
| H | -4.382253 | 0.061339  | -5.067512 | C | 1.399191 | 3.426012  | 3.128997  |
| H | -5.680742 | 1.964996  | -5.895406 | C | 0.583468 | 3.257487  | 4.237712  |
| H | -5.680742 | 4.122751  | -4.649816 | C | 0.583468 | 2.040843  | 4.940019  |
| H | -4.382253 | 4.358006  | -2.587502 | C | 1.399191 | 0.996457  | 4.531565  |
| H | -1.217747 | -4.358006 | -2.587502 | C | 4.510809 | 4.422578  | -1.402917 |
| H | 0.080742  | -4.122751 | -4.649816 | C | 5.326532 | 5.298345  | -0.702392 |
| H | 0.080742  | -1.964996 | -5.895406 | C | 5.326532 | 5.298345  | 0.702392  |
| H | -1.217747 | -0.061339 | -5.067512 | C | 4.510809 | 4.422578  | 1.402917  |
| H | -4.382253 | -4.419424 | 2.480657  | C | 1.399191 | 0.996457  | -4.531565 |
| H | -5.680742 | -6.088115 | 1.245627  | C | 0.583468 | 2.040843  | -4.940019 |
| H | -5.680742 | -6.088115 | -1.245627 | C | 0.583468 | 3.257487  | -4.237712 |
| H | -4.382253 | -4.419424 | -2.480657 | C | 1.399191 | 3.426012  | -3.128997 |
| H | -1.217747 | -0.061339 | 5.067512  | C | 4.510809 | -3.426012 | -3.128997 |
| H | 0.080742  | -1.964996 | 5.895406  | C | 5.326532 | -3.257487 | -4.237712 |
| H | 0.080742  | -4.122751 | 4.649816  | C | 5.326532 | -2.040843 | -4.940019 |
| H | -1.217747 | -4.358006 | 2.587502  | C | 4.510809 | -0.996457 | -4.531565 |
|   |           |           |           | C | 1.399191 | -4.422578 | 1.402917  |
|   |           |           |           | C | 0.583468 | -5.298345 | 0.702392  |
|   |           |           |           | C | 0.583468 | -5.298345 | -0.702392 |
|   |           |           |           | C | 1.399191 | -4.422578 | -1.402917 |
|   |           |           |           | C | 4.510809 | -0.996457 | 4.531565  |
|   |           |           |           | C | 5.326532 | -2.040843 | 4.940019  |
|   |           |           |           | C | 5.326532 | -3.257487 | 4.237712  |
|   |           |           |           | C | 4.510809 | -3.426012 | 3.128997  |

144  
cf16, c-HBC\_homodimers with bowl depth: 1.56

|   |          |          |           |   |          |          |           |
|---|----------|----------|-----------|---|----------|----------|-----------|
| C | 3.618197 | 3.548373 | 0.724881  | C | 2.291803 | 2.401820 | -2.710471 |
| C | 3.618197 | 3.548373 | -0.724881 | C | 2.291803 | 1.146238 | -3.435471 |
| C | 2.955000 | 2.451021 | -1.415072 | C | 2.955000 | 0.000000 | -2.829997 |

|   |           |           |           |   |           |           |           |
|---|-----------|-----------|-----------|---|-----------|-----------|-----------|
| H | 1.267264  | 4.317568  | 2.519766  | C | -2.955000 | -1.237031 | -0.714145 |
| H | -0.109479 | 4.046524  | 4.518207  | C | -2.955000 | -1.237031 | 0.714145  |
| H | -0.109479 | 1.889061  | 5.763585  | C | -2.955000 | 0.000000  | 1.428285  |
| H | 1.267264  | 0.022887  | 4.998685  | C | -4.510809 | 3.426012  | 3.128997  |
| H | 4.642736  | 4.340592  | -2.479633 | C | -5.326532 | 3.257487  | 4.237712  |
| H | 6.019479  | 5.935917  | -1.245330 | C | -5.326532 | 2.040843  | 4.940019  |
| H | 6.019479  | 5.935917  | 1.245330  | C | -4.510809 | 0.996457  | 4.531565  |
| H | 4.642736  | 4.340592  | 2.479633  | C | -1.399191 | 4.422578  | -1.402917 |
| H | 1.267264  | 0.022887  | -4.998685 | C | -0.583468 | 5.298345  | -0.702392 |
| H | -0.109479 | 1.889061  | -5.763585 | C | -0.583468 | 5.298345  | 0.702392  |
| H | -0.109479 | 4.046524  | -4.518207 | C | -1.399191 | 4.422578  | 1.402917  |
| H | 1.267264  | 4.317568  | -2.519766 | C | -4.510809 | 0.996457  | -4.531565 |
| H | 4.642736  | -4.317568 | -2.519766 | C | -5.326532 | 2.040843  | -4.940019 |
| H | 6.019479  | -4.046524 | -4.518207 | C | -5.326532 | 3.257487  | -4.237712 |
| H | 6.019479  | -1.889061 | -5.763585 | C | -4.510809 | 3.426012  | -3.128997 |
| H | 4.642736  | -0.022887 | -4.998685 | C | -1.399191 | -3.426012 | -3.128997 |
| H | 1.267264  | -4.340592 | 2.479633  | C | -0.583468 | -3.257487 | -4.237712 |
| H | -0.109479 | -5.935917 | 1.245330  | C | -0.583468 | -2.040843 | -4.940019 |
| H | -0.109479 | -5.935917 | -1.245330 | C | -1.399191 | -0.996457 | -4.531565 |
| H | 1.267264  | -4.340592 | -2.479633 | C | -4.510809 | -4.422578 | 1.402917  |
| H | 4.642736  | -0.022887 | 4.998685  | C | -5.326532 | -5.298345 | 0.702392  |
| H | 6.019479  | -1.889061 | 5.763585  | C | -5.326532 | -5.298345 | -0.702392 |
| H | 6.019479  | -4.046524 | 4.518207  | C | -4.510809 | -4.422578 | -1.402917 |
| H | 4.642736  | -4.317568 | 2.519766  | C | -1.399191 | -0.996457 | 4.531565  |
| C | -2.291803 | 3.548373  | 0.724881  | C | -0.583468 | -2.040843 | 4.940019  |
| C | -2.291803 | 3.548373  | -0.724881 | C | -0.583468 | -3.257487 | 4.237712  |
| C | -2.955000 | 2.451021  | -1.415072 | C | -1.399191 | -3.426012 | 3.128997  |
| C | -3.618197 | 2.401820  | -2.710471 | H | -4.642736 | 4.317568  | 2.519766  |
| C | -3.618197 | 1.146238  | -3.435471 | H | -6.019479 | 4.046524  | 4.518207  |
| C | -2.955000 | 0.000000  | -2.829997 | H | -6.019479 | 1.889061  | 5.763585  |
| C | -2.291803 | -1.146238 | -3.435471 | H | -4.642736 | 0.022887  | 4.998685  |
| C | -2.291803 | -2.401820 | -2.710471 | H | -1.267264 | 4.340592  | -2.479633 |
| C | -2.955000 | -2.451021 | -1.415072 | H | 0.109479  | 5.935917  | -1.245330 |
| C | -3.618197 | -3.548373 | -0.724881 | H | 0.109479  | 5.935917  | 1.245330  |
| C | -3.618197 | -3.548373 | 0.724881  | H | -1.267264 | 4.340592  | 2.479633  |
| C | -2.955000 | -2.451021 | 1.415072  | H | -4.642736 | 0.022887  | -4.998685 |
| C | -2.291803 | -2.401820 | 2.710471  | H | -6.019479 | 1.889061  | -5.763585 |
| C | -2.291803 | -1.146238 | 3.435471  | H | -6.019479 | 4.046524  | -4.518207 |
| C | -2.955000 | 0.000000  | 2.829997  | H | -4.642736 | 4.317568  | -2.519766 |
| C | -3.618197 | 1.146238  | 3.435471  | H | -1.267264 | -4.317568 | -2.519766 |
| C | -3.618197 | 2.401820  | 2.710471  | H | 0.109479  | -4.046524 | -4.518207 |
| C | -2.955000 | 2.451021  | 1.415072  | H | 0.109479  | -1.889061 | -5.763585 |
| C | -2.955000 | 1.237031  | 0.714145  | H | -1.267264 | -0.022887 | -4.998685 |
| C | -2.955000 | 1.237031  | -0.714145 | H | -4.642736 | -4.340592 | 2.479633  |
| C | -2.955000 | 0.000000  | -1.428285 | H | -6.019479 | -5.935917 | 1.245330  |

|   |           |           |           |
|---|-----------|-----------|-----------|
| H | -6.019479 | -5.935917 | -1.245330 |
| H | -4.642736 | -4.340592 | -2.479633 |
| H | -1.267264 | -0.022887 | 4.998685  |
| H | 0.109479  | -1.889061 | 5.763585  |
| H | 0.109479  | -4.046524 | 4.518207  |
| H | -1.267264 | -4.317568 | 2.519766  |

144

cf17, c-HBC\_homodimers with bowl depth: 1.65

|   |          |           |           |
|---|----------|-----------|-----------|
| C | 3.847284 | 3.526050  | 0.726722  |
| C | 3.847284 | 3.526050  | -0.726722 |
| C | 3.140000 | 2.449623  | -1.414289 |
| C | 2.432716 | 2.392313  | -2.690241 |
| C | 2.432716 | 1.133530  | -3.417063 |
| C | 3.140000 | 0.000000  | -2.828353 |
| C | 3.847284 | -1.133530 | -3.417063 |
| C | 3.847284 | -2.392313 | -2.690241 |
| C | 3.140000 | -2.449623 | -1.414289 |
| C | 2.432716 | -3.526050 | -0.726722 |
| C | 2.432716 | -3.526050 | 0.726722  |
| C | 3.140000 | -2.449623 | 1.414289  |
| C | 3.847284 | -2.392313 | 2.690241  |
| C | 3.847284 | -1.133530 | 3.417063  |
| C | 3.140000 | 0.000000  | 2.828353  |
| C | 2.432716 | 1.133530  | 3.417063  |
| C | 2.432716 | 2.392313  | 2.690241  |
| C | 3.140000 | 2.449623  | 1.414289  |
| C | 3.140000 | 1.236126  | 0.713630  |
| C | 3.140000 | 1.236126  | -0.713630 |
| C | 3.140000 | 0.000000  | -1.427240 |
| C | 3.140000 | -1.236126 | -0.713630 |
| C | 3.140000 | -1.236126 | 0.713630  |
| C | 3.140000 | 0.000000  | 1.427240  |
| C | 1.486953 | 3.388367  | 3.063883  |
| C | 0.624926 | 3.196415  | 4.133221  |
| C | 0.624926 | 1.980748  | 4.834944  |
| C | 1.486953 | 0.958813  | 4.466397  |
| C | 4.793047 | 4.347304  | -1.402829 |
| C | 5.655074 | 5.177398  | -0.701821 |
| C | 5.655074 | 5.177398  | 0.701821  |
| C | 4.793047 | 4.347304  | 1.402829  |
| C | 1.486953 | 0.958813  | -4.466397 |
| C | 0.624926 | 1.980748  | -4.834944 |

|   |           |           |           |
|---|-----------|-----------|-----------|
| C | 0.624926  | 3.196415  | -4.133221 |
| C | 1.486953  | 3.388367  | -3.063883 |
| C | 4.793047  | -3.388367 | -3.063883 |
| C | 5.655074  | -3.196415 | -4.133221 |
| C | 5.655074  | -1.980748 | -4.834944 |
| C | 4.793047  | -0.958813 | -4.466397 |
| C | 1.486953  | -4.347304 | 1.402829  |
| C | 0.624926  | -5.177398 | 0.701821  |
| C | 0.624926  | -5.177398 | -0.701821 |
| C | 1.486953  | -4.347304 | -1.402829 |
| C | 4.793047  | -0.958813 | 4.466397  |
| C | 5.655074  | -1.980748 | 4.834944  |
| C | 5.655074  | -3.196415 | 4.133221  |
| C | 4.793047  | -3.388367 | 3.063883  |
| H | 1.346780  | 4.274053  | 2.447458  |
| H | -0.104369 | 3.964696  | 4.376635  |
| H | -0.104369 | 1.807178  | 5.621946  |
| H | 1.346780  | -0.018112 | 4.924681  |
| H | 4.933220  | 4.256227  | -2.478069 |
| H | 6.384369  | 5.772408  | -1.245412 |
| H | 6.384369  | 5.772408  | 1.245412  |
| H | 4.933220  | 4.256227  | 2.478069  |
| H | 1.346780  | -0.018112 | -4.924681 |
| H | -0.104369 | 1.807178  | -5.621946 |
| H | -0.104369 | 3.964696  | -4.376635 |
| H | 1.346780  | 4.274053  | -2.447458 |
| H | 4.933220  | -4.274053 | -2.447458 |
| H | 6.384369  | -3.964696 | -4.376635 |
| H | 6.384369  | -1.807178 | -5.621946 |
| H | 4.933220  | 0.018112  | -4.924681 |
| H | 1.346780  | -4.256227 | 2.478069  |
| H | -0.104369 | -5.772408 | 1.245412  |
| H | -0.104369 | -5.772408 | -1.245412 |
| H | 1.346780  | -4.256227 | -2.478069 |
| H | 4.933220  | 0.018112  | 4.924681  |
| H | 6.384369  | -1.807178 | 5.621946  |
| H | 6.384369  | -3.964696 | 4.376635  |
| H | 4.933220  | -4.274053 | 2.447458  |
| C | -2.432716 | 3.526050  | 0.726722  |
| C | -2.432716 | 3.526050  | -0.726722 |
| C | -3.140000 | 2.449623  | -1.414289 |
| C | -3.847284 | 2.392313  | -2.690241 |
| C | -3.847284 | 1.133530  | -3.417063 |
| C | -3.140000 | 0.000000  | -2.828353 |
| C | -2.432716 | -1.133530 | -3.417063 |
| C | -2.432716 | -2.392313 | -2.690241 |
| C | -3.140000 | -2.449623 | -1.414289 |
| C | -3.526050 | -0.726722 | -0.726722 |
| C | -3.526050 | 0.726722  | 0.726722  |
| C | -2.449623 | 1.414289  | 1.414289  |
| C | -2.392313 | 2.690241  | 2.690241  |
| C | -1.133530 | 3.417063  | 3.417063  |
| C | 0.000000  | 2.828353  | 2.828353  |
| C | 1.133530  | 3.417063  | 3.417063  |
| C | 2.392313  | 2.690241  | 2.690241  |
| C | 2.449623  | 1.414289  | 1.414289  |
| C | 1.236126  | 0.713630  | 0.713630  |
| C | 1.236126  | -0.713630 | -0.713630 |
| C | 0.000000  | -1.427240 | -1.427240 |
| C | -1.236126 | -0.713630 | -0.713630 |
| C | -1.236126 | 0.713630  | 0.713630  |
| C | 0.000000  | 1.427240  | 1.427240  |
| C | 3.388367  | 3.063883  | 3.063883  |
| C | 3.196415  | 4.133221  | 4.133221  |
| C | 1.980748  | 4.834944  | 4.834944  |
| C | 0.958813  | 4.466397  | 4.466397  |
| C | 4.347304  | -1.402829 | -1.402829 |
| C | 5.177398  | -0.701821 | -0.701821 |
| C | 5.177398  | 0.701821  | 0.701821  |
| C | 4.347304  | 1.402829  | 1.402829  |
| C | 0.958813  | -4.466397 | -4.466397 |
| C | 1.980748  | -4.834944 | -4.834944 |
| C | -2.432716 | 3.526050  | 0.726722  |
| C | -2.432716 | 3.526050  | -0.726722 |
| C | -3.140000 | 2.449623  | -1.414289 |
| C | -3.847284 | 2.392313  | -2.690241 |
| C | -3.847284 | 1.133530  | -3.417063 |
| C | -3.140000 | 0.000000  | -2.828353 |
| C | -2.432716 | -1.133530 | -3.417063 |



|   |           |           |           |                                              |           |           |           |
|---|-----------|-----------|-----------|----------------------------------------------|-----------|-----------|-----------|
| C | -2.432716 | -2.392313 | -2.690241 | H                                            | -1.346780 | 4.256227  | -2.478069 |
| C | -3.140000 | -2.449623 | -1.414289 | H                                            | 0.104369  | 5.772408  | -1.245412 |
| C | -3.847284 | -3.526050 | -0.726722 | H                                            | 0.104369  | 5.772408  | 1.245412  |
| C | -3.847284 | -3.526050 | 0.726722  | H                                            | -1.346780 | 4.256227  | 2.478069  |
| C | -3.140000 | -2.449623 | 1.414289  | H                                            | -4.933220 | -0.018112 | -4.924681 |
| C | -2.432716 | -2.392313 | 2.690241  | H                                            | -6.384369 | 1.807178  | -5.621946 |
| C | -2.432716 | -1.133530 | 3.417063  | H                                            | -6.384369 | 3.964696  | -4.376635 |
| C | -3.140000 | 0.000000  | 2.828353  | H                                            | -4.933220 | 4.274053  | -2.447458 |
| C | -3.847284 | 1.133530  | 3.417063  | H                                            | -1.346780 | -4.274053 | -2.447458 |
| C | -3.847284 | 2.392313  | 2.690241  | H                                            | 0.104369  | -3.964696 | -4.376635 |
| C | -3.140000 | 2.449623  | 1.414289  | H                                            | 0.104369  | -1.807178 | -5.621946 |
| C | -3.140000 | 1.236126  | 0.713630  | H                                            | -1.346780 | 0.018112  | -4.924681 |
| C | -3.140000 | 1.236126  | -0.713630 | H                                            | -4.933220 | -4.256227 | 2.478069  |
| C | -3.140000 | 0.000000  | -1.427240 | H                                            | -6.384369 | -5.772408 | 1.245412  |
| C | -3.140000 | -1.236126 | -0.713630 | H                                            | -6.384369 | -5.772408 | -1.245412 |
| C | -3.140000 | -1.236126 | 0.713630  | H                                            | -4.933220 | -4.256227 | -2.478069 |
| C | -3.140000 | 0.000000  | 1.427240  | H                                            | -1.346780 | 0.018112  | 4.924681  |
| C | -4.793047 | 3.388367  | 3.063883  | H                                            | 0.104369  | -1.807178 | 5.621946  |
| C | -5.655074 | 3.196415  | 4.133221  | H                                            | 0.104369  | -3.964696 | 4.376635  |
| C | -5.655074 | 1.980748  | 4.834944  | H                                            | -1.346780 | -4.274053 | 2.447458  |
| C | -4.793047 | 0.958813  | 4.466397  |                                              |           |           |           |
| C | -1.486953 | 4.347304  | -1.402829 |                                              |           |           |           |
| C | -0.624926 | 5.177398  | -0.701821 |                                              |           |           |           |
| C | -0.624926 | 5.177398  | 0.701821  | 144                                          |           |           |           |
| C | -1.486953 | 4.347304  | 1.402829  | cf18, c-HBC_homodimers with bowl depth: 1.75 |           |           |           |
| C | -4.793047 | 0.958813  | -4.466397 | C                                            | 4.117765  | 3.501082  | 0.728644  |
| C | -5.655074 | 1.980748  | -4.834944 | C                                            | 4.117765  | 3.501082  | -0.728644 |
| C | -5.655074 | 3.196415  | -4.133221 | C                                            | 3.365000  | 2.447960  | -1.413350 |
| C | -4.793047 | 3.388367  | -3.063883 | C                                            | 2.612235  | 2.381569  | -2.667681 |
| C | -1.486953 | -3.388367 | -3.063883 | C                                            | 2.612235  | 1.119528  | -3.396516 |
| C | -0.624926 | -3.196415 | -4.133221 | C                                            | 3.365000  | 0.000000  | -2.826541 |
| C | -0.624926 | -1.980748 | -4.834944 | C                                            | 4.117765  | -1.119528 | -3.396516 |
| C | -1.486953 | -0.958813 | -4.466397 | C                                            | 4.117765  | -2.381569 | -2.667681 |
| C | -4.793047 | -4.347304 | 1.402829  | C                                            | 3.365000  | -2.447960 | -1.413350 |
| C | -5.655074 | -5.177398 | 0.701821  | C                                            | 2.612235  | -3.501082 | -0.728644 |
| C | -5.655074 | -5.177398 | -0.701821 | C                                            | 2.612235  | -3.501082 | 0.728644  |
| C | -4.793047 | -4.347304 | -1.402829 | C                                            | 3.365000  | -2.447960 | 1.413350  |
| C | -1.486953 | -0.958813 | 4.466397  | C                                            | 4.117765  | -2.381569 | 2.667681  |
| C | -0.624926 | -1.980748 | 4.834944  | C                                            | 4.117765  | -1.119528 | 3.396516  |
| C | -0.624926 | -3.196415 | 4.133221  | C                                            | 3.365000  | 0.000000  | 2.826541  |
| C | -1.486953 | -3.388367 | 3.063883  | C                                            | 2.612235  | 1.119528  | 3.396516  |
| H | -4.933220 | 4.274053  | 2.447458  | C                                            | 2.612235  | 2.381569  | 2.667681  |
| H | -6.384369 | 3.964696  | 4.376635  | C                                            | 3.365000  | 2.447960  | 1.413350  |
| H | -6.384369 | 1.807178  | 5.621946  | C                                            | 3.365000  | 1.235025  | 0.713005  |
| H | -4.933220 | -0.018112 | 4.924681  | C                                            | 3.365000  | 1.235025  | -0.713005 |

|   |           |           |           |   |           |           |           |
|---|-----------|-----------|-----------|---|-----------|-----------|-----------|
| C | 3.365000  | 0.000000  | -1.426088 | H | -0.057397 | -5.592771 | 1.245483  |
| C | 3.365000  | -1.235025 | -0.713005 | H | -0.057397 | -5.592771 | -1.245483 |
| C | 3.365000  | -1.235025 | 0.713005  | H | 1.466296  | -4.163946 | -2.476168 |
| C | 3.365000  | 0.000000  | 1.426088  | H | 5.263704  | 0.062538  | 4.843992  |
| C | 1.614715  | 3.347062  | 2.992094  | H | 6.787397  | -1.717728 | 5.466177  |
| C | 0.706963  | 3.129327  | 4.017716  | H | 6.787397  | -3.874962 | 4.220731  |
| C | 0.706963  | 1.914795  | 4.718975  | H | 5.263704  | -4.226359 | 2.367978  |
| C | 1.614715  | 0.917733  | 4.394870  | C | -2.612235 | 3.501082  | 0.728644  |
| C | 5.115285  | 4.264732  | -1.402594 | C | -2.612235 | 3.501082  | -0.728644 |
| C | 6.023037  | 5.044185  | -0.701206 | C | -3.365000 | 2.447960  | -1.413350 |
| C | 6.023037  | 5.044185  | 0.701206  | C | -4.117765 | 2.381569  | -2.667681 |
| C | 5.115285  | 4.264732  | 1.402594  | C | -4.117765 | 1.119528  | -3.396516 |
| C | 1.614715  | 0.917733  | -4.394870 | C | -3.365000 | 0.000000  | -2.826541 |
| C | 0.706963  | 1.914795  | -4.718975 | C | -2.612235 | -1.119528 | -3.396516 |
| C | 0.706963  | 3.129327  | -4.017716 | C | -2.612235 | -2.381569 | -2.667681 |
| C | 1.614715  | 3.347062  | -2.992094 | C | -3.365000 | -2.447960 | -1.413350 |
| C | 5.115285  | -3.347062 | -2.992094 | C | -4.117765 | -3.501082 | -0.728644 |
| C | 6.023037  | -3.129327 | -4.017716 | C | -4.117765 | -3.501082 | 0.728644  |
| C | 6.023037  | -1.914795 | -4.718975 | C | -3.365000 | -2.447960 | 1.413350  |
| C | 5.115285  | -0.917733 | -4.394870 | C | -2.612235 | -2.381569 | 2.667681  |
| C | 1.614715  | -4.264732 | 1.402594  | C | -2.612235 | -1.119528 | 3.396516  |
| C | 0.706963  | -5.044185 | 0.701206  | C | -3.365000 | 0.000000  | 2.826541  |
| C | 0.706963  | -5.044185 | -0.701206 | C | -4.117765 | 1.119528  | 3.396516  |
| C | 1.614715  | -4.264732 | -1.402594 | C | -4.117765 | 2.381569  | 2.667681  |
| C | 5.115285  | -0.917733 | 4.394870  | C | -3.365000 | 2.447960  | 1.413350  |
| C | 6.023037  | -1.914795 | 4.718975  | C | -3.365000 | 1.235025  | 0.713005  |
| C | 6.023037  | -3.129327 | 4.017716  | C | -3.365000 | 1.235025  | -0.713005 |
| C | 5.115285  | -3.347062 | 2.992094  | C | -3.365000 | 0.000000  | -1.426088 |
| H | 1.466296  | 4.226359  | 2.367978  | C | -3.365000 | -1.235025 | -0.713005 |
| H | -0.057397 | 3.874962  | 4.220731  | C | -3.365000 | -1.235025 | 0.713005  |
| H | -0.057397 | 1.717728  | 5.466177  | C | -3.365000 | 0.000000  | 1.426088  |
| H | 1.466296  | -0.062538 | 4.843992  | C | -5.115285 | 3.347062  | 2.992094  |
| H | 5.263704  | 4.163946  | -2.476168 | C | -6.023037 | 3.129327  | 4.017716  |
| H | 6.787397  | 5.592771  | -1.245483 | C | -6.023037 | 1.914795  | 4.718975  |
| H | 6.787397  | 5.592771  | 1.245483  | C | -5.115285 | 0.917733  | 4.394870  |
| H | 5.263704  | 4.163946  | 2.476168  | C | -1.614715 | 4.264732  | -1.402594 |
| H | 1.466296  | -0.062538 | -4.843992 | C | -0.706963 | 5.044185  | -0.701206 |
| H | -0.057397 | 1.717728  | -5.466177 | C | -0.706963 | 5.044185  | 0.701206  |
| H | -0.057397 | 3.874962  | -4.220731 | C | -1.614715 | 4.264732  | 1.402594  |
| H | 1.466296  | 4.226359  | -2.367978 | C | -5.115285 | 0.917733  | -4.394870 |
| H | 5.263704  | -4.226359 | -2.367978 | C | -6.023037 | 1.914795  | -4.718975 |
| H | 6.787397  | -3.874962 | -4.220731 | C | -6.023037 | 3.129327  | -4.017716 |
| H | 6.787397  | -1.717728 | -5.466177 | C | -5.115285 | 3.347062  | -2.992094 |
| H | 5.263704  | 0.062538  | -4.843992 | C | -1.614715 | -3.347062 | -2.992094 |
| H | 1.466296  | -4.163946 | 2.476168  | C | -0.706963 | -3.129327 | -4.017716 |

|   |           |           |           |   |          |           |           |
|---|-----------|-----------|-----------|---|----------|-----------|-----------|
| C | -0.706963 | -1.914795 | -4.718975 | C | 4.395475 | -1.104298 | -3.374397 |
| C | -1.614715 | -0.917733 | -4.394870 | C | 4.395475 | -2.370016 | -2.643255 |
| C | -5.115285 | -4.264732 | 1.402594  | C | 3.595000 | -2.446588 | -1.412595 |
| C | -6.023037 | -5.044185 | 0.701206  | C | 2.794525 | -3.474066 | -0.730828 |
| C | -6.023037 | -5.044185 | -0.701206 | C | 2.794525 | -3.474066 | 0.730828  |
| C | -5.115285 | -4.264732 | -1.402594 | C | 3.595000 | -2.446588 | 1.412595  |
| C | -1.614715 | -0.917733 | 4.394870  | C | 4.395475 | -2.370016 | 2.643255  |
| C | -0.706963 | -1.914795 | 4.718975  | C | 4.395475 | -1.104298 | 3.374397  |
| C | -0.706963 | -3.129327 | 4.017716  | C | 3.595000 | 0.000000  | 2.825215  |
| C | -1.614715 | -3.347062 | 2.992094  | C | 2.794525 | 1.104298  | 3.374397  |
| H | -5.263704 | 4.226359  | 2.367978  | C | 2.794525 | 2.370016  | 2.643255  |
| H | -6.787397 | 3.874962  | 4.220731  | C | 3.595000 | 2.446588  | 1.412595  |
| H | -6.787397 | 1.717728  | 5.466177  | C | 3.595000 | 1.234134  | 0.712570  |
| H | -5.263704 | -0.062538 | 4.843992  | C | 3.595000 | 1.234134  | -0.712570 |
| H | -1.466296 | 4.163946  | -2.476168 | C | 3.595000 | 0.000000  | -1.425323 |
| H | 0.057397  | 5.592771  | -1.245483 | C | 3.595000 | -1.234134 | -0.712570 |
| H | 0.057397  | 5.592771  | 1.245483  | C | 3.595000 | -1.234134 | 0.712570  |
| H | -1.466296 | 4.163946  | 2.476168  | C | 3.595000 | 0.000000  | 1.425323  |
| H | -5.263704 | -0.062538 | -4.843992 | C | 1.747477 | 3.302839  | 2.915573  |
| H | -6.787397 | 1.717728  | -5.466177 | C | 0.797513 | 3.058707  | 3.895940  |
| H | -6.787397 | 3.874962  | -4.220731 | C | 0.797513 | 1.845568  | 4.596708  |
| H | -5.263704 | 4.226359  | -2.367978 | C | 1.747477 | 0.874334  | 4.318615  |
| H | -1.466296 | -4.226359 | -2.367978 | C | 5.442523 | 4.176656  | -1.402166 |
| H | 0.057397  | -3.874962 | -4.220731 | C | 6.392487 | 4.903568  | -0.700466 |
| H | 0.057397  | -1.717728 | -5.466177 | C | 6.392487 | 4.903568  | 0.700466  |
| H | -1.466296 | 0.062538  | -4.843992 | C | 5.442523 | 4.176656  | 1.402166  |
| H | -5.263704 | -4.163946 | 2.476168  | C | 1.747477 | 0.874334  | -4.318615 |
| H | -6.787397 | -5.592771 | 1.245483  | C | 0.797513 | 1.845568  | -4.596708 |
| H | -6.787397 | -5.592771 | -1.245483 | C | 0.797513 | 3.058707  | -3.895940 |
| H | -5.263704 | -4.163946 | -2.476168 | C | 1.747477 | 3.302839  | -2.915573 |
| H | -1.466296 | 0.062538  | 4.843992  | C | 5.442523 | -3.302839 | -2.915573 |
| H | 0.057397  | -1.717728 | 5.466177  | C | 6.392487 | -3.058707 | -3.895940 |
| H | 0.057397  | -3.874962 | 4.220731  | C | 6.392487 | -1.845568 | -4.596708 |
| H | -1.466296 | -4.226359 | 2.367978  | C | 5.442523 | -0.874334 | -4.318615 |

144

cf19, c-HBC\_homodimers with bowl depth: 1.85

|   |          |          |           |   |          |           |           |
|---|----------|----------|-----------|---|----------|-----------|-----------|
| C | 4.395475 | 3.474066 | 0.730828  | C | 4.395475 | -1.104298 | -3.374397 |
| C | 4.395475 | 3.474066 | -0.730828 | C | 4.395475 | -2.370016 | -2.643255 |
| C | 3.595000 | 2.446588 | -1.412595 | C | 3.595000 | -2.446588 | -1.412595 |
| C | 2.794525 | 2.370016 | -2.643255 | C | 2.794525 | -3.474066 | -0.730828 |
| C | 2.794525 | 1.104298 | -3.374397 | C | 2.794525 | -3.474066 | 0.730828  |
| C | 3.595000 | 0.000000 | -2.825215 | C | 3.595000 | -2.446588 | 1.412595  |

|   |           |           |           |   |           |           |           |
|---|-----------|-----------|-----------|---|-----------|-----------|-----------|
| H | 1.590813  | -0.108782 | 4.759505  | C | -5.442523 | 3.302839  | 2.915573  |
| H | 5.599187  | 4.066741  | -2.474038 | C | -6.392487 | 3.058707  | 3.895940  |
| H | 7.188216  | 5.404700  | -1.245628 | C | -6.392487 | 1.845568  | 4.596708  |
| H | 7.188216  | 5.404700  | 1.245628  | C | -5.442523 | 0.874334  | 4.318615  |
| H | 5.599187  | 4.066741  | 2.474038  | C | -1.747477 | 4.176656  | -1.402166 |
| H | 1.590813  | -0.108782 | -4.759505 | C | -0.797513 | 4.903568  | -0.700466 |
| H | 0.001784  | 1.624338  | -5.303387 | C | -0.797513 | 4.903568  | 0.700466  |
| H | 0.001784  | 3.781412  | -4.057410 | C | -1.747477 | 4.176656  | 1.402166  |
| H | 1.590813  | 4.176071  | -2.284404 | C | -5.442523 | 0.874334  | -4.318615 |
| H | 5.599187  | -4.176071 | -2.284404 | C | -6.392487 | 1.845568  | -4.596708 |
| H | 7.188216  | -3.781412 | -4.057410 | C | -6.392487 | 3.058707  | -3.895940 |
| H | 7.188216  | -1.624338 | -5.303387 | C | -5.442523 | 3.302839  | -2.915573 |
| H | 5.599187  | 0.108782  | -4.759505 | C | -1.747477 | -3.302839 | -2.915573 |
| H | 1.590813  | -4.066741 | 2.474038  | C | -0.797513 | -3.058707 | -3.895940 |
| H | 0.001784  | -5.404700 | 1.245628  | C | -0.797513 | -1.845568 | -4.596708 |
| H | 0.001784  | -5.404700 | -1.245628 | C | -1.747477 | -0.874334 | -4.318615 |
| H | 1.590813  | -4.066741 | -2.474038 | C | -5.442523 | -4.176656 | 1.402166  |
| H | 5.599187  | 0.108782  | 4.759505  | C | -6.392487 | -4.903568 | 0.700466  |
| H | 7.188216  | -1.624338 | 5.303387  | C | -6.392487 | -4.903568 | -0.700466 |
| H | 7.188216  | -3.781412 | 4.057410  | C | -5.442523 | -4.176656 | -1.402166 |
| H | 5.599187  | -4.176071 | 2.284404  | C | -1.747477 | -0.874334 | 4.318615  |
| C | -2.794525 | 3.474066  | 0.730828  | C | -0.797513 | -1.845568 | 4.596708  |
| C | -2.794525 | 3.474066  | -0.730828 | C | -0.797513 | -3.058707 | 3.895940  |
| C | -3.595000 | 2.446588  | -1.412595 | C | -1.747477 | -3.302839 | 2.915573  |
| C | -4.395475 | 2.370016  | -2.643255 | H | -5.599187 | 4.176071  | 2.284404  |
| C | -4.395475 | 1.104298  | -3.374397 | H | -7.188216 | 3.781412  | 4.057410  |
| C | -3.595000 | 0.000000  | -2.825215 | H | -7.188216 | 1.624338  | 5.303387  |
| C | -2.794525 | -1.104298 | -3.374397 | H | -5.599187 | -0.108782 | 4.759505  |
| C | -2.794525 | -2.370016 | -2.643255 | H | -1.590813 | 4.066741  | -2.474038 |
| C | -3.595000 | -2.446588 | -1.412595 | H | -0.001784 | 5.404700  | -1.245628 |
| C | -4.395475 | -3.474066 | -0.730828 | H | -0.001784 | 5.404700  | 1.245628  |
| C | -4.395475 | -3.474066 | 0.730828  | H | -1.590813 | 4.066741  | 2.474038  |
| C | -3.595000 | -2.446588 | 1.412595  | H | -5.599187 | -0.108782 | -4.759505 |
| C | -2.794525 | -2.370016 | 2.643255  | H | -7.188216 | 1.624338  | -5.303387 |
| C | -2.794525 | -1.104298 | 3.374397  | H | -7.188216 | 3.781412  | -4.057410 |
| C | -3.595000 | 0.000000  | 2.825215  | H | -5.599187 | 4.176071  | -2.284404 |
| C | -4.395475 | 1.104298  | 3.374397  | H | -1.590813 | -4.176071 | -2.284404 |
| C | -4.395475 | 2.370016  | 2.643255  | H | -0.001784 | -3.781412 | -4.057410 |
| C | -3.595000 | 2.446588  | 1.412595  | H | -0.001784 | -1.624338 | -5.303387 |
| C | -3.595000 | 1.234134  | 0.712570  | H | -1.590813 | 0.108782  | -4.759505 |
| C | -3.595000 | 1.234134  | -0.712570 | H | -5.599187 | -4.066741 | 2.474038  |
| C | -3.595000 | 0.000000  | -1.425323 | H | -7.188216 | -5.404700 | 1.245628  |
| C | -3.595000 | -1.234134 | -0.712570 | H | -7.188216 | -5.404700 | -1.245628 |
| C | -3.595000 | -1.234134 | 0.712570  | H | -5.599187 | -4.066741 | -2.474038 |
| C | -3.595000 | 0.000000  | 1.425323  | H | -1.590813 | 0.108782  | 4.759505  |

|                                                        |           |           |           |   |           |           |           |
|--------------------------------------------------------|-----------|-----------|-----------|---|-----------|-----------|-----------|
| H                                                      | -0.001784 | -1.624338 | 5.303387  | C | 5.393814  | -1.438326 | -2.170051 |
| H                                                      | -0.001784 | -3.781412 | 4.057410  | C | 6.231716  | 1.425016  | 0.006314  |
| H                                                      | -1.590813 | -4.176071 | 2.284404  | C | 6.231389  | 0.733153  | 1.221408  |
|                                                        |           |           |           | C | 4.876058  | -2.608734 | -1.485134 |
|                                                        |           |           |           | C | 5.393636  | -2.600026 | -0.128966 |
| 132                                                    |           |           |           | C | 3.230601  | -2.289085 | 2.700581  |
| cf0, c-HBC_heterodimers_with_C60 with bowl depth: 0.00 |           |           |           | C | 4.586843  | -2.292538 | 2.183377  |
|                                                        |           |           |           | C | 6.231398  | -1.424657 | 0.023614  |
| C                                                      | -0.269240 | 0.718135  | -1.230444 | C | 3.569742  | 0.021278  | 3.498747  |
| C                                                      | 0.568222  | 1.159988  | -2.330292 | C | 5.393940  | 1.188390  | 2.315919  |
| C                                                      | 1.375221  | 2.292536  | -2.183610 | C | 6.231304  | -0.718137 | 1.230211  |
| C                                                      | 0.568427  | 2.600024  | 0.128733  | C | 4.876097  | 0.018271  | 3.000755  |
| C                                                      | -0.269335 | 1.424655  | -0.023848 | C | 5.393842  | -1.159989 | 2.330059  |
| C                                                      | 1.085966  | -0.018272 | -3.000988 | C | 5.393654  | 1.411792  | -2.187283 |
| C                                                      | 2.731463  | 2.289083  | -2.700815 | C | 4.876088  | 2.590658  | -1.516832 |
| C                                                      | 1.086006  | 2.608733  | 1.484901  | C | 5.393545  | 2.598208  | -0.160627 |
| C                                                      | -0.268619 | 0.706622  | 2.127068  | C | 3.230209  | -1.194303 | -3.331755 |
| C                                                      | -0.269325 | -0.733154 | -1.221641 | C | 4.585683  | -0.744177 | -3.075171 |
| C                                                      | 2.392235  | 3.042057  | 1.731763  | C | 1.376166  | 3.024849  | -0.930317 |
| C                                                      | 3.230468  | 3.483160  | 0.631904  | C | 2.731448  | 3.475365  | -0.674499 |
| C                                                      | 2.392322  | -0.021279 | -3.498980 | C | 4.585685  | 3.035718  | 0.893115  |
| C                                                      | 3.569704  | 3.020898  | -1.768870 | C | 3.230523  | 2.321880  | 2.672804  |
| C                                                      | 3.230173  | 1.153742  | -3.346015 | C | 4.586789  | 2.318914  | 2.155358  |
| C                                                      | 0.568250  | 1.438325  | 2.169818  | C | -3.439702 | -3.671358 | -1.264243 |
| C                                                      | -0.269042 | -0.691675 | 1.245722  | C | -3.439751 | -2.961668 | -2.511144 |
| C                                                      | -0.269653 | -1.425017 | -0.006548 | C | -3.439752 | -1.485405 | -2.536519 |
| C                                                      | 0.568124  | -1.188392 | -2.316152 | C | -3.439801 | -0.740602 | -3.811214 |
| C                                                      | 0.568410  | -1.411794 | 2.187050  | C | -3.439801 | 0.694130  | -3.819951 |
| C                                                      | 0.568519  | -2.598209 | 0.160394  | C | -3.439752 | 1.454402  | -2.554422 |
| C                                                      | 1.375275  | -2.318916 | -2.155591 | C | -3.439751 | 2.930865  | -2.547028 |
| C                                                      | 1.376380  | 0.744176  | 3.074937  | C | -3.439703 | 3.655688  | -1.308863 |
| C                                                      | 4.585496  | 0.706618  | -3.083609 | C | -3.439652 | 2.939722  | -0.017768 |
| C                                                      | 1.085976  | -2.590659 | 1.516599  | C | -3.439602 | 3.671359  | 1.264512  |
| C                                                      | 1.376379  | -3.035719 | -0.893348 | C | -3.439553 | 2.961669  | 2.511413  |
| C                                                      | 2.731541  | -2.321882 | -2.673037 | C | -3.439553 | 1.485407  | 2.536788  |
| C                                                      | 3.569828  | -3.042059 | -1.731997 | C | -3.439503 | 0.740603  | 3.811483  |
| C                                                      | 6.231105  | 0.691673  | -1.245955 | C | -3.439503 | -0.694128 | 3.820220  |
| C                                                      | 2.731595  | -3.483161 | -0.632137 | C | -3.439553 | -1.454401 | 2.554691  |
| C                                                      | 3.230615  | -3.475366 | 0.674266  | C | -3.439553 | -2.930863 | 2.547297  |
| C                                                      | 4.585898  | -3.024850 | 0.930084  | C | -3.439602 | -3.655687 | 1.309132  |
| C                                                      | 2.392359  | -3.020900 | 1.768636  | C | -3.439652 | -2.939721 | 0.018037  |
| C                                                      | 2.731854  | 1.194302  | 3.331522  | C | -3.439652 | -1.491879 | 0.009220  |
| C                                                      | 6.230682  | -0.706624 | -1.237302 | C | -3.439703 | -0.753812 | -1.287174 |
| C                                                      | 1.376567  | -0.706619 | 3.083375  | C | -3.439703 | 0.738080  | -1.296259 |
| C                                                      | 2.731890  | -1.153744 | 3.345782  | C | -3.439652 | 1.491880  | -0.008951 |

|   |           |           |           |   |           |           |          |
|---|-----------|-----------|-----------|---|-----------|-----------|----------|
| C | -3.439602 | 0.753814  | 1.287443  | H | -3.439628 | 5.745946  | 0.573160 |
| C | -3.439602 | -0.738078 | 1.296528  | H | -3.439446 | -2.312312 | 5.291016 |
| C | -3.439596 | -5.081266 | 1.459725  | H | -3.439368 | -1.246828 | 7.259730 |
| C | -3.439551 | -5.825741 | 2.612184  | H | -3.439368 | 1.335152  | 7.244006 |
| C | -3.439505 | -5.129244 | 3.801908  | H | -3.439446 | 2.376580  | 5.262462 |
| C | -3.439508 | -3.759875 | 3.716753  |   |           |           |          |
| C | -3.439797 | -3.804861 | -3.670416 |   |           |           |          |
| C | -3.439800 | -5.175165 | -3.738888 |   |           |           |          |
| C | -3.439753 | -5.857121 | -2.540769 |   |           |           |          |
| C | -3.439708 | -5.098666 | -1.397462 |   |           |           |          |
| C | -3.439853 | 1.276369  | -5.129871 |   |           |           |          |
| C | -3.439900 | 0.650651  | -6.350895 |   |           |           |          |
| C | -3.439900 | -0.727951 | -6.342500 |   |           |           |          |
| C | -3.439853 | -1.338751 | -5.113946 |   |           |           |          |
| C | -3.439708 | 5.081268  | -1.459456 |   |           |           |          |
| C | -3.439753 | 5.825742  | -2.611915 |   |           |           |          |
| C | -3.439800 | 5.129245  | -3.801639 |   |           |           |          |
| C | -3.439797 | 3.759877  | -3.716484 |   |           |           |          |
| C | -3.439508 | 3.804863  | 3.670685  |   |           |           |          |
| C | -3.439505 | 5.175167  | 3.739157  |   |           |           |          |
| C | -3.439551 | 5.857123  | 2.541038  |   |           |           |          |
| C | -3.439596 | 5.098667  | 1.397731  |   |           |           |          |
| C | -3.439452 | -1.276367 | 5.130140  |   |           |           |          |
| C | -3.439404 | -0.650650 | 6.351165  |   |           |           |          |
| C | -3.439404 | 0.727953  | 6.342769  |   |           |           |          |
| C | -3.439452 | 1.338753  | 5.114215  |   |           |           |          |
| H | -3.439628 | -5.738539 | 0.643098  |   |           |           |          |
| H | -3.439554 | -6.910678 | 2.550112  |   |           |           |          |
| H | -3.439466 | -5.606235 | 4.778350  |   |           |           |          |
| H | -3.439469 | -3.368877 | 4.689315  |   |           |           |          |
| H | -3.439835 | -3.425737 | -4.647668 |   |           |           |          |
| H | -3.439838 | -5.664013 | -4.709448 |   |           |           |          |
| H | -3.439750 | -6.941222 | -2.465489 |   |           |           |          |
| H | -3.439676 | -5.745944 | -0.572891 |   |           |           |          |
| H | -3.439859 | 2.312313  | -5.290747 |   |           |           |          |
| H | -3.439936 | 1.246830  | -7.259461 |   |           |           |          |
| H | -3.439936 | -1.335151 | -7.243737 |   |           |           |          |
| H | -3.439859 | -2.376578 | -5.262192 |   |           |           |          |
| H | -3.439676 | 5.738541  | -0.642829 |   |           |           |          |
| H | -3.439750 | 6.910679  | -2.549843 |   |           |           |          |
| H | -3.439838 | 5.606236  | -4.778081 |   |           |           |          |
| H | -3.439835 | 3.368879  | -4.689046 |   |           |           |          |
| H | -3.439470 | 3.425739  | 4.647937  |   |           |           |          |
| H | -3.439467 | 5.664014  | 4.709717  |   |           |           |          |
| H | -3.439554 | 6.941223  | 2.465758  |   |           |           |          |

132  
cfl, c-HBC\_heterodimers\_with\_C60 with bowl depth: 0.10

|   |           |           |           |  |  |  |  |
|---|-----------|-----------|-----------|--|--|--|--|
| C | -0.269241 | 0.720307  | -1.229174 |  |  |  |  |
| C | 0.568220  | 1.164100  | -2.328241 |  |  |  |  |
| C | 1.375219  | 2.296388  | -2.179560 |  |  |  |  |
| C | 0.568428  | 2.599793  | 0.133323  |  |  |  |  |
| C | -0.269335 | 1.424695  | -0.021332 |  |  |  |  |
| C | 1.085964  | -0.012974 | -3.001016 |  |  |  |  |
| C | 2.731461  | 2.293848  | -2.696771 |  |  |  |  |
| C | 1.086007  | 2.606107  | 1.489503  |  |  |  |  |
| C | -0.268618 | 0.704437  | 1.238314  |  |  |  |  |
| C | -0.269326 | -0.730996 | -1.222934 |  |  |  |  |
| C | 2.392237  | 3.038995  | 1.737130  |  |  |  |  |
| C | 3.230469  | 3.482039  | 0.638050  |  |  |  |  |
| C | 2.392319  | -0.015101 | -3.499014 |  |  |  |  |
| C | 3.569703  | 3.024016  | -1.763536 |  |  |  |  |
| C | 3.230171  | 1.159648  | -3.343975 |  |  |  |  |
| C | 0.568252  | 1.434492  | 2.172354  |  |  |  |  |
| C | -0.269041 | -0.693873 | 1.244499  |  |  |  |  |
| C | -0.269653 | -1.425004 | -0.009063 |  |  |  |  |
| C | 0.568122  | -1.184301 | -2.318247 |  |  |  |  |
| C | 0.568412  | -1.415653 | 2.184553  |  |  |  |  |
| C | 0.568519  | -2.598489 | 0.155806  |  |  |  |  |
| C | 1.375273  | -2.315106 | -2.159683 |  |  |  |  |
| C | 1.376383  | 0.738746  | 3.076245  |  |  |  |  |
| C | 4.585494  | 0.712061  | -3.082360 |  |  |  |  |
| C | 1.085977  | -2.593333 | 1.512022  |  |  |  |  |
| C | 1.376379  | -3.034138 | -0.898707 |  |  |  |  |
| C | 2.731539  | -2.317159 | -2.677134 |  |  |  |  |
| C | 3.569827  | -3.038996 | -1.737367 |  |  |  |  |
| C | 6.231104  | 0.693872  | -1.244736 |  |  |  |  |
| C | 2.731595  | -3.482040 | -0.638288 |  |  |  |  |
| C | 3.230616  | -3.476551 | 0.668127  |  |  |  |  |
| C | 4.585898  | -3.026488 | 0.924739  |  |  |  |  |
| C | 2.392361  | -3.024017 | 1.763298  |  |  |  |  |
| C | 2.731857  | 1.188418  | 3.333623  |  |  |  |  |
| C | 6.230681  | -0.704438 | -1.238552 |  |  |  |  |

|   |           |           |           |   |           |           |           |
|---|-----------|-----------|-----------|---|-----------|-----------|-----------|
| C | 1.376570  | -0.712062 | 3.082122  | C | -3.439652 | -1.491021 | 0.006585  |
| C | 2.731893  | -1.159649 | 3.343738  | C | -3.439601 | -0.739865 | 1.294233  |
| C | 5.393812  | -1.434493 | -2.172591 | C | -3.439601 | 0.751031  | 1.287787  |
| C | 6.231716  | 1.425003  | 0.008826  | C | -3.439652 | 1.491023  | -0.006310 |
| C | 6.231390  | 0.730995  | 1.222696  | C | -3.537037 | 3.761613  | -3.708572 |
| C | 4.876057  | -2.606108 | -1.489741 | C | -3.582687 | 5.130570  | -3.789616 |
| C | 5.393636  | -2.599794 | -0.133560 | C | -3.582640 | 5.825258  | -2.598134 |
| C | 3.230603  | -2.293849 | 2.696533  | C | -3.536947 | 5.080226  | -1.446842 |
| C | 4.586844  | -2.296389 | 2.179323  | C | -3.342618 | -1.330984 | -5.111025 |
| C | 6.231398  | -1.424696 | 0.021094  | C | -3.297020 | -0.717034 | -6.337264 |
| C | 3.569744  | 0.015100  | 3.498776  | C | -3.297020 | 0.662201  | -6.343228 |
| C | 5.393941  | 1.184300  | 2.318010  | C | -3.342618 | 1.286733  | -5.122345 |
| C | 6.231305  | -0.720308 | 1.228937  | C | -3.536947 | -5.092549 | -1.402853 |
| C | 4.876099  | 0.012973  | 3.000779  | C | -3.582640 | -5.847509 | -2.547659 |
| C | 5.393843  | -1.164101 | 2.328004  | C | -3.582687 | -5.163152 | -3.745104 |
| C | 5.393652  | 1.415652  | -2.184791 | C | -3.537037 | -3.793545 | -3.675902 |
| C | 4.876087  | 2.593332  | -1.512259 | C | -3.342267 | -3.761612 | 3.708846  |
| C | 5.393545  | 2.598488  | -0.156044 | C | -3.296617 | -5.130569 | 3.789890  |
| C | 3.230207  | -1.188419 | -3.333861 | C | -3.296665 | -5.825257 | 2.598408  |
| C | 4.585681  | -0.738747 | -3.076483 | C | -3.342357 | -5.080225 | 1.447116  |
| C | 1.376165  | 3.026487  | -0.924976 | C | -3.536686 | 1.330985  | 5.111299  |
| C | 2.731448  | 3.476550  | -0.668364 | C | -3.582284 | 0.717035  | 6.337538  |
| C | 4.585685  | 3.034137  | 0.898470  | C | -3.582284 | -0.662200 | 6.343503  |
| C | 3.230525  | 2.317158  | 2.676897  | C | -3.536686 | -1.286732 | 5.122619  |
| C | 4.586790  | 2.315105  | 2.159446  | C | -3.342357 | 5.092550  | 1.403127  |
| C | -3.395487 | 0.700698  | -3.815692 | C | -3.296665 | 5.847510  | 2.547933  |
| C | -3.395487 | -0.733671 | -3.809490 | C | -3.296617 | 5.163153  | 3.745378  |
| C | -3.439754 | -1.480035 | -2.537447 | C | -3.342267 | 3.793546  | 3.676176  |
| C | -3.484070 | -2.954927 | -2.514876 | H | -3.545322 | 3.368054  | -4.680766 |
| C | -3.484020 | -3.666654 | -1.269526 | H | -3.621228 | 5.609128  | -4.764507 |
| C | -3.439652 | -2.937866 | 0.012841  | H | -3.621139 | 6.909385  | -2.534190 |
| C | -3.395284 | -3.655536 | 1.301463  | H | -3.545160 | 5.732583  | -0.625600 |
| C | -3.395234 | -2.933066 | 2.540611  | H | -3.334378 | -2.369746 | -5.256192 |
| C | -3.439551 | -1.458034 | 2.550426  | H | -3.258554 | -1.322229 | -7.239030 |
| C | -3.483817 | -0.700697 | 3.815966  | H | -3.258554 | 1.259575  | -7.250195 |
| C | -3.483817 | 0.733672  | 3.809764  | H | -3.334378 | 2.324200  | -5.276490 |
| C | -3.439551 | 1.480036  | 2.537721  | H | -3.545160 | -5.737779 | -0.576000 |
| C | -3.395234 | 2.954929  | 2.515150  | H | -3.621139 | -6.931043 | -2.474341 |
| C | -3.395284 | 3.666655  | 1.269800  | H | -3.621228 | -5.650123 | -4.715820 |
| C | -3.439652 | 2.937867  | -0.012567 | H | -3.545322 | -3.408409 | -4.651464 |
| C | -3.484020 | 3.655538  | -1.301188 | H | -3.333982 | -3.368053 | 4.681041  |
| C | -3.484070 | 2.933068  | -2.540337 | H | -3.258076 | -5.609127 | 4.764781  |
| C | -3.439754 | 1.458035  | -2.550152 | H | -3.258165 | -6.909384 | 2.534464  |
| C | -3.439704 | 0.739867  | -1.293959 | H | -3.334144 | -5.732582 | 0.625874  |
| C | -3.439704 | -0.751029 | -1.287512 | H | -3.544926 | 2.369747  | 5.256466  |

|   |           |           |          |   |          |           |           |
|---|-----------|-----------|----------|---|----------|-----------|-----------|
| H | -3.620750 | 1.322230  | 7.239304 | C | 2.731865 | 1.305326  | 3.289599  |
| H | -3.620750 | -1.259574 | 7.250469 | C | 6.230679 | -0.747710 | -1.212934 |
| H | -3.544926 | -2.324199 | 5.276764 | C | 1.376577 | -0.602846 | 3.105329  |
| H | -3.334144 | 5.737781  | 0.576274 | C | 2.731901 | -1.040921 | 3.382574  |
| H | -3.258165 | 6.931044  | 2.474615 | C | 5.393807 | -1.510274 | -2.120625 |
| H | -3.258076 | 5.650124  | 4.716094 | C | 6.231716 | 1.424426  | -0.041484 |
| H | -3.333982 | 3.408410  | 4.651738 | C | 6.231393 | 0.773690  | 1.196122  |

132

cf2, c-HBC\_heterodimers\_with\_C60 with bowl depth: 0.19

|   |           |           |           |   |           |           |           |
|---|-----------|-----------|-----------|---|-----------|-----------|-----------|
| C | -0.269244 | 0.676479  | -1.253829 | C | 3.569752  | 0.138568  | 3.496055  |
| C | 0.568215  | 1.081208  | -2.367875 | C | 5.393947  | 1.265367  | 2.274758  |
| C | 1.375214  | 2.218037  | -2.259248 | C | 6.231308  | -0.676488 | 1.253578  |
| C | 0.568428  | 2.602878  | 0.041488  | C | 4.876106  | 0.118866  | 2.998440  |
| C | -0.269335 | 1.423055  | -0.071598 | C | 5.393849  | -1.081218 | 2.367624  |
| C | 1.085957  | -0.118876 | -2.998691 | C | 5.393647  | 1.337665  | -2.233403 |
| C | 2.731455  | 2.197246  | -2.776051 | C | 4.876084  | 2.538346  | -1.602851 |
| C | 1.086010  | 2.657050  | 1.396600  | C | 5.393545  | 2.591361  | -0.247663 |
| C | -0.268615 | 0.747700  | 1.212683  | C | 3.230199  | -1.305336 | -3.289851 |
| C | -0.269329 | -0.773700 | -1.196373 | C | 4.585674  | -0.846861 | -3.048506 |
| C | 2.392241  | 3.098408  | 1.628792  | C | 1.376163  | 2.991957  | -1.031213 |
| C | 3.230470  | 3.502387  | 0.514759  | C | 2.731446  | 3.450797  | -0.790647 |
| C | 2.392311  | -0.138577 | -3.496307 | C | 4.585687  | 3.063954  | 0.790820  |
| C | 3.569699  | 2.959895  | -1.869168 | C | 3.230531  | 2.410186  | 2.593446  |
| C | 3.230163  | 1.040912  | -3.382826 | C | 4.586795  | 2.389873  | 2.076386  |
| C | 0.568257  | 1.510264  | 2.120374  | C | -3.351767 | 0.565558  | -3.830032 |
| C | -0.269038 | -0.649521 | 1.268212  | C | -3.351767 | -0.866980 | -3.773241 |
| C | -0.269653 | -1.424436 | 0.041233  | C | -3.439759 | -1.565522 | -2.478969 |
| C | 0.568117  | -1.265377 | -2.275009 | C | -3.527804 | -3.034387 | -2.404726 |
| C | 0.568417  | -1.337675 | 2.233152  | C | -3.527752 | -3.701605 | -1.135853 |
| C | 0.568519  | -2.591371 | 0.247412  | C | -3.439652 | -2.930009 | 0.116302  |
| C | 1.375268  | -2.389883 | -2.076637 | C | -3.351552 | -3.600060 | 1.425608  |
| C | 1.376390  | 0.846851  | 3.048255  | C | -3.351500 | -2.834487 | 2.637680  |
| C | 4.585487  | 0.602836  | -3.105580 | C | -3.439545 | -1.364355 | 2.595411  |
| C | 1.085980  | -2.538356 | 1.602600  | C | -3.527538 | -0.565547 | 3.830322  |
| C | 1.376376  | -3.063964 | -0.791071 | C | -3.527538 | 0.866992  | 3.773531  |
| C | 2.731533  | -2.410196 | -2.593697 | C | -3.439545 | 1.565534  | 2.479259  |
| C | 3.569823  | -3.098417 | -1.629043 | C | -3.351500 | 3.034399  | 2.405016  |
| C | 6.231102  | 0.649511  | -1.268463 | C | -3.351552 | 3.701617  | 1.136142  |
| C | 2.731593  | -3.502397 | -0.515010 | C | -3.439652 | 2.930020  | -0.116012 |
| C | 3.230617  | -3.450807 | 0.790396  | C | -3.527752 | 3.600071  | -1.425318 |
| C | 4.585900  | -2.991967 | 1.030961  | C | -3.527805 | 2.834499  | -2.637390 |
| C | 2.392365  | -2.959905 | 1.868916  | C | -3.439759 | 1.364366  | -2.595121 |



|   |           |           |           |
|---|-----------|-----------|-----------|
| C | -3.439706 | 0.692113  | -1.316288 |
| C | -3.439706 | -0.794142 | -1.257368 |
| C | -3.439652 | -1.486454 | 0.059074  |
| C | -3.439598 | -0.692101 | 1.316578  |
| C | -3.439598 | 0.794153  | 1.257658  |
| C | -3.439652 | 1.486465  | -0.058784 |
| C | -3.634284 | 3.612786  | -3.834655 |
| C | -3.724953 | 4.976469  | -3.959431 |
| C | -3.724902 | 5.713973  | -2.792039 |
| C | -3.634188 | 5.015653  | -1.613999 |
| C | -3.245391 | -1.514181 | -5.046244 |
| C | -3.154777 | -0.940290 | -6.289599 |
| C | -3.154777 | 0.439436  | -6.344297 |
| C | -3.245391 | 1.109953  | -5.150275 |
| C | -3.634188 | -5.127681 | -1.211879 |
| C | -3.724902 | -5.917067 | -2.330941 |
| C | -3.724953 | -5.274291 | -3.553053 |
| C | -3.634284 | -3.905011 | -3.536622 |
| C | -3.245021 | -3.612775 | 3.834945  |
| C | -3.154352 | -4.976457 | 3.959721  |
| C | -3.154402 | -5.713961 | 2.792328  |
| C | -3.245116 | -5.015642 | 1.614288  |
| C | -3.633913 | 1.514193  | 5.046534  |
| C | -3.724528 | 0.940302  | 6.289889  |
| C | -3.724528 | -0.439424 | 6.344587  |
| C | -3.633913 | -1.109942 | 5.150564  |
| C | -3.245117 | 5.127693  | 1.212169  |
| C | -3.154402 | 5.917078  | 2.331231  |
| C | -3.154352 | 5.274303  | 3.553343  |
| C | -3.245021 | 3.905022  | 3.536912  |
| H | -3.650816 | 3.172415  | -4.788367 |
| H | -3.802852 | 5.420509  | -4.948148 |
| H | -3.802757 | 6.797564  | -2.768568 |
| H | -3.650644 | 5.688235  | -0.806999 |
| H | -3.228906 | -2.560301 | -5.143042 |
| H | -3.076957 | -1.574368 | -7.168640 |
| H | -3.076957 | 1.001936  | -7.270774 |
| H | -3.228906 | 2.145127  | -5.329583 |
| H | -3.650644 | -5.734268 | -0.354169 |
| H | -3.802757 | -6.995399 | -2.221764 |
| H | -3.802852 | -5.795207 | -4.503515 |
| H | -3.650816 | -3.541521 | -4.522202 |
| H | -3.228489 | -3.172404 | 4.788657  |
| H | -3.076453 | -5.420497 | 4.948438  |
| H | -3.076547 | -6.797553 | 2.768858  |

|   |           |           |          |
|---|-----------|-----------|----------|
| H | -3.228661 | -5.688224 | 0.807289 |
| H | -3.650398 | 2.560312  | 5.143332 |
| H | -3.802348 | 1.574380  | 7.168930 |
| H | -3.802348 | -1.001925 | 7.271064 |
| H | -3.650398 | -2.145116 | 5.329873 |
| H | -3.228661 | 5.734280  | 0.354459 |
| H | -3.076547 | 6.995411  | 2.222053 |
| H | -3.076453 | 5.795219  | 4.503805 |
| H | -3.228489 | 3.541532  | 4.522492 |

132

cf3, c-HBC\_heterodimers\_with\_C60 with bowl depth: 0.29

|   |           |           |           |
|---|-----------|-----------|-----------|
| C | -0.273886 | 0.719883  | -1.229422 |
| C | 0.563573  | 1.163298  | -2.328643 |
| C | 1.370573  | 2.295637  | -2.180354 |
| C | 0.563785  | 2.599839  | 0.132426  |
| C | -0.273978 | 1.424688  | -0.021822 |
| C | 1.081316  | -0.014008 | -3.001013 |
| C | 2.726813  | 2.292919  | -2.697566 |
| C | 1.081366  | 2.606620  | 1.488604  |
| C | -0.273258 | 0.704864  | 1.238072  |
| C | -0.273971 | -0.731417 | -1.222681 |
| C | 2.387597  | 3.039593  | 1.736078  |
| C | 3.225827  | 3.482258  | 0.636845  |
| C | 2.387670  | -0.016307 | -3.499012 |
| C | 3.565057  | 3.023409  | -1.764584 |
| C | 3.225522  | 1.158496  | -3.344381 |
| C | 0.563613  | 1.435240  | 2.171858  |
| C | -0.273681 | -0.693444 | 1.244738  |
| C | -0.274296 | -1.425007 | -0.008572 |
| C | 0.563475  | -1.185099 | -2.317840 |
| C | 0.563773  | -1.414900 | 2.185040  |
| C | 0.563876  | -2.598435 | 0.156701  |
| C | 1.370627  | -2.315851 | -2.158888 |
| C | 1.371745  | 0.739806  | 3.075988  |
| C | 4.580846  | 0.710999  | -3.082613 |
| C | 1.081337  | -2.592812 | 1.512914  |
| C | 1.371734  | -3.034447 | -0.897664 |
| C | 2.726891  | -2.318081 | -2.676340 |
| C | 3.565181  | -3.039595 | -1.736326 |
| C | 6.226459  | 0.693443  | -1.244986 |
| C | 2.726951  | -3.482259 | -0.637093 |
| C | 3.225974  | -3.476321 | 0.669319  |

|   |           |           |           |   |           |           |           |
|---|-----------|-----------|-----------|---|-----------|-----------|-----------|
| C | 4.581257  | -3.026169 | 0.925774  | C | -3.565823 | 2.914597  | -2.530149 |
| C | 2.387721  | -3.023410 | 1.764336  | C | -3.434400 | 1.450175  | -2.538506 |
| C | 2.727220  | 1.189567  | 3.333209  | C | -3.434348 | 0.735289  | -1.287024 |
| C | 6.226036  | -0.704865 | -1.238320 | C | -3.434348 | -0.747275 | -1.280102 |
| C | 1.371932  | -0.711000 | 3.082365  | C | -3.434295 | -1.482686 | 0.007065  |
| C | 2.727256  | -1.158497 | 3.344133  | C | -3.434242 | -0.735288 | 1.287310  |
| C | 5.389165  | -1.435242 | -2.172106 | C | -3.434242 | 0.747276  | 1.280388  |
| C | 6.227074  | 1.425005  | 0.008324  | C | -3.434295 | 1.482687  | -0.006779 |
| C | 6.226749  | 0.731416  | 1.222433  | C | -3.726162 | 3.721244  | -3.700632 |
| C | 4.871412  | -2.606621 | -1.488851 | C | -3.863839 | 5.085777  | -3.768478 |
| C | 5.388993  | -2.599840 | -0.132674 | C | -3.863789 | 5.783052  | -2.573637 |
| C | 3.225965  | -2.292920 | 2.697318  | C | -3.726067 | 5.052366  | -1.419295 |
| C | 4.582205  | -2.295638 | 2.180106  | C | -3.142793 | -1.344384 | -5.072163 |
| C | 6.226756  | -1.424689 | 0.021574  | C | -3.005169 | -0.721099 | -6.287872 |
| C | 3.565108  | 0.016306  | 3.498765  | C | -3.005169 | 0.662356  | -6.294331 |
| C | 5.389303  | 1.185098  | 2.317592  | C | -3.142793 | 1.296965  | -5.084495 |
| C | 6.226664  | -0.719884 | 1.229174  | C | -3.726067 | -5.065398 | -1.372058 |
| C | 4.871462  | 0.014007  | 3.000765  | C | -3.863789 | -5.806831 | -2.519526 |
| C | 5.389205  | -1.163299 | 2.328395  | C | -3.863839 | -5.120743 | -3.720826 |
| C | 5.389005  | 1.414899  | -2.185288 | C | -3.726162 | -3.755636 | -3.665724 |
| C | 4.871441  | 2.592811  | -1.513162 | C | -3.142428 | -3.721243 | 3.700918  |
| C | 5.388902  | 2.598434  | -0.156949 | C | -3.004751 | -5.085776 | 3.768764  |
| C | 3.225558  | -1.189568 | -3.333457 | C | -3.004801 | -5.783051 | 2.573923  |
| C | 4.581033  | -0.739807 | -3.076236 | C | -3.142523 | -5.052364 | 1.419582  |
| C | 1.371521  | 3.026168  | -0.926022 | C | -3.725797 | 1.344386  | 5.072449  |
| C | 2.726804  | 3.476320  | -0.669567 | C | -3.863421 | 0.721101  | 6.288158  |
| C | 4.581044  | 3.034446  | 0.897416  | C | -3.863421 | -0.662354 | 6.294617  |
| C | 3.225887  | 2.318080  | 2.676092  | C | -3.725797 | -1.296964 | 5.084781  |
| C | 4.582151  | 2.315849  | 2.158640  | C | -3.142523 | 5.065399  | 1.372344  |
| C | -3.303030 | 0.698682  | -3.795169 | C | -3.004801 | 5.806833  | 2.519812  |
| C | -3.303030 | -0.734088 | -3.788479 | C | -3.004751 | 5.120745  | 3.721112  |
| C | -3.434400 | -1.473815 | -2.524855 | C | -3.142428 | 3.755638  | 3.666010  |
| C | -3.565823 | -2.938095 | -2.502824 | H | -3.750940 | 3.295373  | -4.664242 |
| C | -3.565771 | -3.648595 | -1.258738 | H | -3.983110 | 5.566030  | -4.735870 |
| C | -3.434295 | -2.923811 | 0.013794  | H | -3.983017 | 6.861539  | -2.515248 |
| C | -3.302819 | -3.636681 | 1.293037  | H | -3.750769 | 5.682050  | -0.574892 |
| C | -3.302767 | -2.914596 | 2.530435  | H | -3.118060 | -2.391801 | -5.185514 |
| C | -3.434190 | -1.450174 | 2.538792  | H | -2.885976 | -1.319063 | -7.187367 |
| C | -3.565560 | -0.698681 | 3.795455  | H | -2.885976 | 1.251895  | -7.199370 |
| C | -3.565560 | 0.734090  | 3.788766  | H | -3.118060 | 2.343278  | -5.207621 |
| C | -3.434190 | 1.473816  | 2.525141  | H | -3.750769 | -5.687170 | -0.521812 |
| C | -3.302767 | 2.938096  | 2.503110  | H | -3.983017 | -6.884725 | -2.451070 |
| C | -3.302819 | 3.648596  | 1.259024  | H | -3.983110 | -5.610008 | -4.683692 |
| C | -3.434295 | 2.923813  | -0.013508 | H | -3.750940 | -3.338781 | -4.633268 |
| C | -3.565771 | 3.636682  | -1.292751 | H | -3.117650 | -3.295371 | 4.664528  |

|                                                        |           |           |           |   |           |           |           |
|--------------------------------------------------------|-----------|-----------|-----------|---|-----------|-----------|-----------|
| H                                                      | -2.885480 | -5.566029 | 4.736156  | C | 2.722306  | -3.484234 | -0.626214 |
| H                                                      | -2.885573 | -6.861537 | 2.515534  | C | 3.221333  | -3.474212 | 0.680171  |
| H                                                      | -3.117821 | -5.682049 | 0.575178  | C | 4.576617  | -3.023261 | 0.935214  |
| H                                                      | -3.750530 | 2.391802  | 5.185800  | C | 2.383083  | -3.017881 | 1.773770  |
| H                                                      | -3.982614 | 1.319065  | 7.187653  | C | 2.722587  | 1.199978  | 3.329467  |
| H                                                      | -3.982614 | -1.251893 | 7.199656  | C | 6.221390  | -0.708732 | -1.236129 |
| H                                                      | -3.750530 | -2.343276 | 5.207907  | C | 1.367298  | -0.701363 | 3.084568  |
| H                                                      | -3.117821 | 5.687171  | 0.522098  | C | 2.722623  | -1.148040 | 3.347729  |
| H                                                      | -2.885573 | 6.884727  | 2.451356  | C | 5.384516  | -1.442023 | -2.167626 |
| H                                                      | -2.885480 | 5.610009  | 4.683978  | C | 6.222431  | 1.425024  | 0.003852  |
| H                                                      | -3.117650 | 3.338782  | 4.633554  | C | 6.222110  | 0.735233  | 1.220123  |
|                                                        |           |           |           | C | 4.866764  | -2.611262 | -1.480712 |
|                                                        |           |           |           | C | 5.384350  | -2.600242 | -0.124563 |
|                                                        |           |           |           | C | 3.221330  | -2.284479 | 2.704462  |
| 132                                                    |           |           |           | C | 4.577569  | -2.288813 | 2.187257  |
| cf4, c-HBC_heterodimers_with_C60 with bowl depth: 0.39 |           |           |           | C | 6.222113  | -1.424615 | 0.026009  |
| C                                                      | -0.278532 | 0.716037  | -1.231665 | C | 3.560475  | 0.027241  | 3.498686  |
| C                                                      | 0.558924  | 1.156014  | -2.332269 | C | 5.384667  | 1.192336  | 2.313861  |
| C                                                      | 1.365923  | 2.288811  | -2.187521 | C | 6.222025  | -0.716039 | 1.231400  |
| C                                                      | 0.559143  | 2.600240  | 0.124298  | C | 4.866828  | 0.023385  | 3.000693  |
| C                                                      | -0.278621 | 1.424612  | -0.026274 | C | 5.384569  | -1.156016 | 2.332004  |
| C                                                      | 1.076664  | -0.023387 | -3.000958 | C | 5.384356  | 1.408062  | -2.189715 |
| C                                                      | 2.722162  | 2.284477  | -2.704727 | C | 4.866794  | 2.588069  | -1.521272 |
| C                                                      | 1.076728  | 2.611260  | 1.480447  | C | 5.384259  | 2.597930  | -0.165084 |
| C                                                      | -0.277898 | 0.708730  | 1.235864  | C | 3.220905  | -1.199980 | -3.329732 |
| C                                                      | -0.278617 | -0.735235 | -1.220388 | C | 4.576381  | -0.749418 | -3.073922 |
| C                                                      | 2.382959  | 3.045004  | 1.726563  | C | 1.366875  | 3.023259  | -0.935479 |
| C                                                      | 3.221186  | 3.484232  | 0.625949  | C | 2.722159  | 3.474210  | -0.680436 |
| C                                                      | 2.383017  | -0.027243 | -3.498951 | C | 4.576404  | 3.037236  | 0.887915  |
| C                                                      | 3.560409  | 3.017879  | -1.774035 | C | 3.221252  | 2.326433  | 2.668825  |
| C                                                      | 3.220869  | 1.148037  | -3.347994 | C | 4.577515  | 2.322585  | 2.151378  |
| C                                                      | 0.558976  | 1.442021  | 2.167361  | C | -3.254499 | 0.686377  | -3.780260 |
| C                                                      | -0.278321 | -0.689551 | 1.246901  | C | -3.254499 | -0.745219 | -3.769102 |
| C                                                      | -0.278939 | -1.425026 | -0.004117 | C | -3.429050 | -1.475811 | -2.510373 |
| C                                                      | 0.558826  | -1.192338 | -2.314126 | C | -3.603657 | -2.931153 | -2.484619 |
| C                                                      | 0.559136  | -1.408064 | 2.189450  | C | -3.603601 | -3.637337 | -1.239362 |
| C                                                      | 0.559234  | -2.597932 | 0.164819  | C | -3.428938 | -2.912246 | 0.022852  |
| C                                                      | 1.365977  | -2.322587 | -2.151643 | C | -3.254274 | -3.617574 | 1.296214  |
| C                                                      | 1.367111  | 0.749416  | 3.073657  | C | -3.254219 | -2.892066 | 2.530313  |
| C                                                      | 4.576194  | 0.701361  | -3.084833 | C | -3.428825 | -1.436498 | 2.533378  |
| C                                                      | 1.076698  | -2.588071 | 1.521007  | C | -3.603377 | -0.686375 | 3.780566  |
| C                                                      | 1.367089  | -3.037238 | -0.888180 | C | -3.603377 | 0.745222  | 3.769408  |
| C                                                      | 2.722240  | -2.326435 | -2.669090 | C | -3.428825 | 1.475813  | 2.510678  |
| C                                                      | 3.560533  | -3.045006 | -1.726828 | C | -3.254219 | 2.931156  | 2.484925  |
| C                                                      | 6.221813  | 0.689549  | -1.247165 | C | -3.254274 | 3.637339  | 1.239667  |

|   |           |           |           |
|---|-----------|-----------|-----------|
| C | -3.428938 | 2.912249  | -0.022546 |
| C | -3.603601 | 3.617576  | -1.295908 |
| C | -3.603657 | 2.892068  | -2.530007 |
| C | -3.429050 | 1.436501  | -2.533072 |
| C | -3.428995 | 0.727937  | -1.283449 |
| C | -3.428995 | -0.747854 | -1.271946 |
| C | -3.428938 | -1.476013 | 0.011657  |
| C | -3.428881 | -0.727935 | 1.283754  |
| C | -3.428881 | 0.747857  | 1.272252  |
| C | -3.428938 | 1.476015  | -0.011352 |
| C | -3.818054 | 3.676043  | -3.704471 |
| C | -4.003778 | 5.036309  | -3.764750 |
| C | -4.003724 | 5.739236  | -2.569082 |
| C | -3.817951 | 5.025136  | -1.409832 |
| C | -3.040211 | -1.370016 | -5.035395 |
| C | -2.854542 | -0.742165 | -6.243520 |
| C | -2.854542 | 0.644753  | -6.254330 |
| C | -3.040211 | 1.291359  | -5.056138 |
| C | -3.817951 | -5.046502 | -1.331331 |
| C | -4.003724 | -5.778584 | -2.479309 |
| C | -4.003778 | -5.094381 | -3.685789 |
| C | -3.818054 | -3.733340 | -3.646720 |
| C | -3.039822 | -3.676041 | 3.704776  |
| C | -2.854098 | -5.036307 | 3.765056  |
| C | -2.854151 | -5.739233 | 2.569388  |
| C | -3.039925 | -5.025134 | 1.410137  |
| C | -3.817665 | 1.370018  | 5.035700  |
| C | -4.003333 | 0.742167  | 6.243826  |
| C | -4.003333 | -0.644751 | 6.254636  |
| C | -3.817665 | -1.291357 | 5.056444  |
| C | -3.039925 | 5.046504  | 1.331636  |
| C | -2.854151 | 5.778587  | 2.479615  |
| C | -2.854098 | 5.094383  | 3.686094  |
| C | -3.039822 | 3.733342  | 3.647025  |
| H | -3.851078 | 3.221854  | -4.659542 |
| H | -4.165662 | 5.514480  | -4.726998 |
| H | -4.165563 | 6.812586  | -2.519262 |
| H | -3.850894 | 5.638717  | -0.548554 |
| H | -3.007233 | -2.424173 | -5.120138 |
| H | -2.692741 | -1.336146 | -7.138938 |
| H | -2.692741 | 1.224704  | -7.158898 |
| H | -3.007233 | 2.344068  | -5.157303 |
| H | -3.850894 | -5.646582 | -0.460594 |
| H | -4.165563 | -6.851027 | -2.412765 |
| H | -4.165662 | -5.587493 | -4.640466 |

|   |           |           |           |
|---|-----------|-----------|-----------|
| H | -3.851078 | -3.294094 | -4.608755 |
| H | -3.006797 | -3.221852 | 4.659848  |
| H | -2.692214 | -5.514478 | 4.727304  |
| H | -2.692313 | -6.812583 | 2.519568  |
| H | -3.006981 | -5.638714 | 0.548860  |
| H | -3.850643 | 2.424176  | 5.120444  |
| H | -4.165134 | 1.336148  | 7.139243  |
| H | -4.165134 | -1.224702 | 7.159203  |
| H | -3.850643 | -2.344066 | 5.157609  |
| H | -3.006981 | 5.646585  | 0.460899  |
| H | -2.692313 | 6.851030  | 2.413070  |
| H | -2.692214 | 5.587495  | 4.640772  |
| H | -3.006797 | 3.294096  | 4.609061  |

132

cf5, c-HBC\_heterodimers\_with\_C60 with bowl depth: 0.49

|   |           |           |           |
|---|-----------|-----------|-----------|
| C | -0.278550 | 0.717842  | -1.230610 |
| C | 0.558890  | 1.159432  | -2.330580 |
| C | 1.365892  | 2.292015  | -2.184183 |
| C | 0.559145  | 2.600055  | 0.128102  |
| C | -0.278621 | 1.424650  | -0.024181 |
| C | 1.076622  | -0.018988 | -3.001004 |
| C | 2.722124  | 2.288439  | -2.701414 |
| C | 1.076749  | 2.609087  | 1.484258  |
| C | -0.277880 | 0.706917  | 1.236906  |
| C | -0.278635 | -0.733445 | -1.221461 |
| C | 2.382984  | 3.042470  | 1.730991  |
| C | 3.221196  | 3.483310  | 0.631010  |
| C | 2.382967  | -0.022113 | -3.499021 |
| C | 3.560384  | 3.020476  | -1.769660 |
| C | 3.220822  | 1.152944  | -3.346353 |
| C | 0.559007  | 1.438842  | 2.169464  |
| C | -0.278303 | -0.691378 | 1.245892  |
| C | -0.278939 | -1.425019 | -0.006202 |
| C | 0.558792  | -1.188944 | -2.315880 |
| C | 0.559167  | -1.411272 | 2.187376  |
| C | 0.559236  | -2.598171 | 0.161003  |
| C | 1.365946  | -2.319430 | -2.155065 |
| C | 1.367155  | 0.744909  | 3.074733  |
| C | 4.576150  | 0.705882  | -3.083867 |
| C | 1.076719  | -2.590298 | 1.517196  |
| C | 1.367075  | -3.035933 | -0.892651 |
| C | 2.722202  | -2.322519 | -2.672537 |

|   |           |           |           |   |           |           |           |
|---|-----------|-----------|-----------|---|-----------|-----------|-----------|
| C | 3.560508  | -3.042472 | -1.731341 | C | -3.211333 | 2.910104  | 2.479194  |
| C | 6.221795  | 0.691376  | -1.246242 | C | -3.211406 | 3.617594  | 1.235726  |
| C | 2.722297  | -3.483312 | -0.631360 | C | -3.428938 | 2.899023  | -0.018144 |
| C | 3.221343  | -3.475206 | 0.675031  | C | -3.646470 | 3.601668  | -1.281008 |
| C | 4.576630  | -3.024629 | 0.930715  | C | -3.646543 | 2.878497  | -2.515422 |
| C | 2.383108  | -3.020478 | 1.769310  | C | -3.429086 | 1.433610  | -2.519374 |
| C | 2.722635  | 1.195096  | 3.331184  | C | -3.429013 | 0.726004  | -1.275591 |
| C | 6.221372  | -0.706920 | -1.237256 | C | -3.429013 | -0.742090 | -1.266301 |
| C | 1.367342  | -0.705884 | 3.083517  | C | -3.428938 | -1.468306 | 0.009494  |
| C | 2.722671  | -1.152946 | 3.346004  | C | -3.428863 | -0.726002 | 1.275995  |
| C | 5.384485  | -1.438845 | -2.169814 | C | -3.428863 | 0.742093  | 1.266704  |
| C | 6.222431  | 1.425017  | 0.005852  | C | -3.428938 | 1.468309  | -0.009090 |
| C | 6.222127  | 0.733443  | 1.221111  | C | -3.915344 | 3.641275  | -3.689922 |
| C | 4.866743  | -2.609089 | -1.484608 | C | -4.151428 | 4.995847  | -3.732907 |
| C | 5.384348  | -2.600057 | -0.128452 | C | -4.151357 | 5.699056  | -2.532670 |
| C | 3.221368  | -2.288441 | 2.701064  | C | -3.915207 | 4.998970  | -1.372323 |
| C | 4.577600  | -2.292017 | 2.183833  | C | -2.943042 | -1.374705 | -4.997211 |
| C | 6.222113  | -1.424652 | 0.023832  | C | -2.707031 | -0.734777 | -6.191763 |
| C | 3.560525  | 0.022111  | 3.498672  | C | -2.707031 | 0.656355  | -6.200566 |
| C | 5.384700  | 1.188942  | 2.315530  | C | -2.943042 | 1.311351  | -5.014209 |
| C | 6.222042  | -0.717844 | 1.230260  | C | -3.915207 | -5.015938 | -1.308947 |
| C | 4.866871  | 0.018986  | 3.000654  | C | -4.151357 | -5.730653 | -2.460341 |
| C | 5.384602  | -1.159434 | 2.330230  | C | -4.151428 | -5.042690 | -3.669382 |
| C | 5.384325  | 1.411270  | -2.187725 | C | -3.915344 | -3.687682 | -3.643543 |
| C | 4.866773  | 2.590296  | -1.517545 | C | -2.942532 | -3.641272 | 3.690325  |
| C | 5.384257  | 2.598169  | -0.161353 | C | -2.706448 | -4.995844 | 3.733311  |
| C | 3.220858  | -1.195098 | -3.331534 | C | -2.706519 | -5.699054 | 2.533074  |
| C | 4.576337  | -0.744911 | -3.075083 | C | -2.942669 | -4.998967 | 1.372727  |
| C | 1.366862  | 3.024627  | -0.931065 | C | -3.914833 | 1.374708  | 4.997614  |
| C | 2.722150  | 3.475204  | -0.675381 | C | -4.150845 | 0.734779  | 6.192167  |
| C | 4.576417  | 3.035930  | 0.892301  | C | -4.150845 | -0.656353 | 6.200970  |
| C | 3.221290  | 2.322517  | 2.672187  | C | -3.914833 | -1.311348 | 5.014612  |
| C | 4.577546  | 2.319428  | 2.154715  | C | -2.942669 | 5.015940  | 1.309350  |
| C | -3.211701 | 0.691514  | -3.758722 | C | -2.706519 | 5.730655  | 2.460745  |
| C | -3.211701 | -0.739029 | -3.749669 | C | -2.706448 | 5.042693  | 3.669785  |
| C | -3.429086 | -1.465380 | -2.501028 | C | -2.942532 | 3.687685  | 3.643946  |
| C | -3.646543 | -2.910101 | -2.478791 | H | -3.956628 | 3.162105  | -4.638234 |
| C | -3.646470 | -3.617592 | -1.235323 | H | -4.357937 | 5.476373  | -4.685361 |
| C | -3.428938 | -2.899021 | 0.018547  | H | -4.357807 | 6.764852  | -2.486013 |
| C | -3.211406 | -3.601665 | 1.281411  | H | -3.956383 | 5.590989  | -0.490195 |
| C | -3.211333 | -2.878494 | 2.515826  | H | -2.901818 | -2.435521 | -5.055194 |
| C | -3.428790 | -1.433607 | 2.519777  | H | -2.500630 | -1.319281 | -7.084264 |
| C | -3.646175 | -0.691512 | 3.759126  | H | -2.500630 | 1.229518  | -7.100393 |
| C | -3.646175 | 0.739032  | 3.750073  | H | -2.901818 | 2.371348  | -5.085613 |
| C | -3.428790 | 1.465383  | 2.501432  | H | -3.956383 | -5.596745 | -0.419397 |

|   |           |           |           |   |          |           |           |
|---|-----------|-----------|-----------|---|----------|-----------|-----------|
| H | -4.357807 | -6.795773 | -2.400198 | C | 1.367126 | -3.032285 | -0.904889 |
| H | -4.357937 | -5.535232 | -4.615678 | C | 2.722349 | -2.311654 | -2.681790 |
| H | -3.956628 | -3.220553 | -4.597843 | C | 3.560604 | -3.035420 | -1.743478 |
| H | -2.901248 | -3.162103 | 4.638638  | C | 6.221863 | 0.696428  | -1.243085 |
| H | -2.499939 | -5.476371 | 4.685765  | C | 2.722333 | -3.480721 | -0.645341 |
| H | -2.500069 | -6.764849 | 2.486416  | C | 3.221307 | -3.477916 | 0.661100  |
| H | -2.901493 | -5.590986 | 0.490599  | C | 4.576580 | -3.028380 | 0.918684  |
| H | -3.956057 | 2.435524  | 5.055598  | C | 2.383012 | -3.027633 | 1.757169  |
| H | -4.357245 | 1.319284  | 7.084668  | C | 2.722452 | 1.181568  | 3.336156  |
| H | -4.357245 | -1.229515 | 7.100797  | C | 6.221440 | -0.701892 | -1.239773 |
| H | -3.956057 | -2.371346 | 5.086017  | C | 1.367173 | -0.718392 | 3.080702  |
| H | -2.901493 | 5.596748  | 0.419801  | C | 2.722488 | -1.166515 | 3.341447  |
| H | -2.500069 | 6.795775  | 2.400602  | C | 5.384604 | -1.430027 | -2.175340 |
| H | -2.499939 | 5.535235  | 4.616081  | C | 6.222430 | 1.424982  | 0.011976  |
| H | -2.901248 | 3.220556  | 4.598247  | C | 6.222060 | 0.728482  | 1.224419  |

132

cf6, c-HBC\_heterodimers\_with\_C60 with bowl depth: 0.58

|   |           |           |           |   |           |           |           |
|---|-----------|-----------|-----------|---|-----------|-----------|-----------|
| C | -0.278483 | 0.722830  | -1.227702 | C | 4.866825  | -2.603042 | -1.494917 |
| C | 0.559018  | 1.168880  | -2.325825 | C | 5.384356  | -2.599514 | -0.138707 |
| C | 1.366011  | 2.300860  | -2.174789 | C | 3.221221  | -2.299383 | 2.691932  |
| C | 0.559137  | 2.599514  | 0.138683  | C | 4.577481  | -2.300860 | 2.174765  |
| C | -0.278620 | 1.424736  | -0.018415 | C | 6.222112  | -1.424736 | 0.018391  |
| C | 1.076786  | -0.006809 | -3.000998 | C | 3.560333  | 0.007913  | 3.498928  |
| C | 2.722271  | 2.299383  | -2.691955 | C | 5.384572  | 1.179536  | 2.320631  |
| C | 1.076667  | 2.603042  | 1.494893  | C | 6.221975  | -0.722830 | 1.227678  |
| C | -0.277948 | 0.701892  | 1.239749  | C | 4.866706  | 0.006809  | 3.000974  |
| C | -0.278568 | -0.728482 | -1.224442 | C | 5.384474  | -1.168881 | 2.325801  |
| C | 2.382888  | 3.035420  | 1.743455  | C | 5.384444  | 1.420137  | -2.181685 |
| C | 3.221160  | 3.480721  | 0.645318  | C | 4.866855  | 2.596433  | -1.506754 |
| C | 2.383159  | -0.007913 | -3.498952 | C | 5.384265  | 2.598803  | -0.150512 |
| C | 3.560480  | 3.027633  | -1.757192 | C | 3.221041  | -1.181568 | -3.336179 |
| C | 3.221005  | 1.166515  | -3.341470 | C | 4.576506  | -0.732425 | -3.077830 |
| C | 0.558888  | 1.430027  | 2.175316  | C | 1.366912  | 3.028380  | -0.918708 |
| C | -0.278371 | -0.696428 | 1.243061  | C | 2.722186  | 3.477916  | -0.661123 |
| C | -0.278938 | -1.424982 | -0.012000 | C | 4.576367  | 3.032285  | 0.904865  |
| C | 0.558920  | -1.179536 | -2.320655 | C | 3.221143  | 2.311654  | 2.681767  |
| C | 0.559048  | -1.420137 | 2.181661  | C | 4.577427  | 2.310665  | 2.164361  |
| C | 0.559228  | -2.598803 | 0.150488  | C | -3.168938 | 0.706615  | -3.735056 |
| C | 1.366065  | -2.310665 | -2.164385 | C | -3.168938 | -0.723565 | -3.731809 |
| C | 1.366986  | 0.732425  | 3.077806  | C | -3.428948 | -1.448684 | -2.495809 |
| C | 4.576319  | 0.718392  | -3.080726 | C | -3.688963 | -2.882025 | -2.479751 |
| C | 1.076637  | -2.596433 | 1.506730  | C | -3.688958 | -3.593638 | -1.239253 |
|   |           |           |           | C | -3.428938 | -2.885229 | 0.006563  |
|   |           |           |           | C | -3.168918 | -3.587975 | 1.255582  |
|   |           |           |           | C | -3.168913 | -2.870738 | 2.492837  |
|   |           |           |           | C | -3.428928 | -1.437338 | 2.502388  |
|   |           |           |           | C | -3.688938 | -0.706615 | 3.735083  |

|   |           |           |           |                                                        |           |           |           |
|---|-----------|-----------|-----------|--------------------------------------------------------|-----------|-----------|-----------|
| C | -3.688938 | 0.723565  | 3.731837  | H                                                      | -2.796057 | 2.411286  | -5.007396 |
| C | -3.428928 | 1.448684  | 2.495837  | H                                                      | -4.061840 | -5.543394 | -0.388677 |
| C | -3.168913 | 2.882025  | 2.479778  | H                                                      | -4.553548 | -6.726564 | -2.397212 |
| C | -3.168918 | 3.593638  | 1.239280  | H                                                      | -4.553557 | -5.464964 | -4.597719 |
| C | -3.428938 | 2.885229  | -0.006536 | H                                                      | -4.061857 | -3.134759 | -4.592831 |
| C | -3.688958 | 3.587975  | -1.255555 | H                                                      | -2.796018 | -3.113875 | 4.607042  |
| C | -3.688963 | 2.870738  | -2.492809 | H                                                      | -2.304318 | -5.444034 | 4.622510  |
| C | -3.428948 | 1.437338  | -2.502360 | H                                                      | -2.304327 | -6.715611 | 2.427753  |
| C | -3.428943 | 0.727342  | -1.266433 | H                                                      | -2.796035 | -5.541572 | 0.413867  |
| C | -3.428943 | -0.733084 | -1.263117 | H                                                      | -4.061819 | 2.433994  | 4.996425  |
| C | -3.428938 | -1.460215 | 0.003328  | H                                                      | -4.553511 | 1.284125  | 7.024491  |
| C | -3.428933 | -0.727342 | 1.266460  | H                                                      | -4.553511 | -1.252221 | 7.030249  |
| C | -3.428933 | 0.733084  | 1.263145  | H                                                      | -4.061819 | -2.411286 | 5.007424  |
| C | -3.428938 | 1.460215  | -0.003301 | H                                                      | -2.796035 | 5.543394  | 0.388705  |
| C | -4.012381 | 3.613463  | -3.663540 | H                                                      | -2.304327 | 6.726564  | 2.397239  |
| C | -4.301078 | 4.960183  | -3.682792 | H                                                      | -2.304318 | 5.464964  | 4.597747  |
| C | -4.301073 | 5.659748  | -2.475538 | H                                                      | -2.796018 | 3.134759  | 4.592858  |
| C | -4.012371 | 4.972926  | -1.317307 |                                                        |           |           |           |
| C | -2.845530 | -1.367102 | -4.959533 |                                                        |           |           |           |
| C | -2.556837 | -0.711614 | -6.136003 |                                                        |           |           |           |
| C | -2.556837 | 0.683750  | -6.139171 | 132                                                    |           |           |           |
| C | -2.845530 | 1.344573  | -4.965689 | cf7, c-HBC_heterodimers_with_C60 with bowl depth: 0.68 |           |           |           |
| C | -4.012371 | -4.978855 | -1.294716 | C                                                      | -0.283142 | 0.720048  | -1.229332 |
| C | -4.301073 | -5.670929 | -2.449817 | C                                                      | 0.554344  | 1.163610  | -2.328473 |
| C | -4.301078 | -4.976851 | -2.660235 | C                                                      | 1.361340  | 2.295929  | -2.180012 |
| C | -4.012380 | -3.630058 | -3.647097 | C                                                      | 0.554496  | 2.599821  | 0.132789  |
| C | -2.845495 | -3.613463 | 3.663567  | C                                                      | -0.283263 | 1.424691  | -0.021638 |
| C | -2.556798 | -4.960183 | 3.682819  | C                                                      | 1.072103  | -0.013605 | -3.000989 |
| C | -2.556803 | -5.659748 | 2.475565  | C                                                      | 2.717593  | 2.293281  | -2.697192 |
| C | -2.845505 | -4.972926 | 1.317334  | C                                                      | 1.072044  | 2.606421  | 1.488980  |
| C | -4.012346 | 1.367102  | 4.959561  | C                                                      | -0.282574 | 0.704698  | 1.238160  |
| C | -4.301038 | 0.711614  | 6.136031  | C                                                      | -0.283227 | -0.731253 | -1.222786 |
| C | -4.301038 | -0.683750 | 6.139198  | C                                                      | 2.378269  | 3.039361  | 1.736544  |
| C | -4.012346 | -1.344573 | 4.965716  | C                                                      | 3.216526  | 3.482173  | 0.637390  |
| C | -2.845505 | 4.978855  | 1.294744  | C                                                      | 2.378469  | -0.015837 | -3.498956 |
| C | -2.556803 | 5.670929  | 2.449845  | C                                                      | 3.555814  | 3.023646  | -1.764092 |
| C | -2.556798 | 4.976851  | 3.660262  | C                                                      | 3.216317  | 1.158945  | -3.344147 |
| C | -2.845495 | 3.630058  | 3.647125  | C                                                      | 0.554274  | 1.434949  | 2.172065  |
| H | -4.061857 | 3.113875  | -4.607015 | C                                                      | -0.282997 | -0.693611 | 1.244639  |
| H | -4.553557 | 5.444034  | -4.622482 | C                                                      | -0.283581 | -1.425005 | -0.008769 |
| H | -4.553549 | 6.715611  | -2.427725 | C                                                      | 0.554246  | -1.184788 | -2.317985 |
| H | -4.061841 | 5.541572  | -0.413840 | C                                                      | 0.554434  | -1.415193 | 2.184864  |
| H | -2.796057 | -2.433994 | -4.996398 | C                                                      | 0.554587  | -2.598456 | 0.156366  |
| H | -2.304365 | -1.284125 | -7.024464 | C                                                      | 1.361394  | -2.315561 | -2.159165 |
| H | -2.304365 | 1.252221  | -7.030221 | C                                                      | 1.362385  | 0.739394  | 3.076121  |

|   |           |           |           |   |           |           |           |
|---|-----------|-----------|-----------|---|-----------|-----------|-----------|
| C | 4.571635  | 0.711413  | -3.082406 | C | -3.423537 | -1.425515 | 2.495229  |
| C | 1.072014  | -2.593015 | 1.512592  | C | -3.725915 | -0.698341 | 3.715988  |
| C | 1.362470  | -3.034326 | -0.898037 | C | -3.725915 | 0.732013  | 3.709501  |
| C | 2.717671  | -2.317722 | -2.676585 | C | -3.423537 | 1.448086  | 2.482199  |
| C | 3.555938  | -3.039361 | -1.736647 | C | -3.121139 | 2.869138  | 2.462973  |
| C | 6.217204  | 0.693611  | -1.244742 | C | -3.121160 | 3.578308  | 1.220834  |
| C | 2.717681  | -3.482174 | -0.637494 | C | -3.423581 | 2.873370  | -0.012970 |
| C | 3.216673  | -3.476410 | 0.668931  | C | -3.726001 | 3.567089  | -1.253116 |
| C | 4.571949  | -3.026292 | 0.925479  | C | -3.726023 | 2.846684  | -2.488773 |
| C | 2.378393  | -3.023646 | 1.763989  | C | -3.423624 | 1.425515  | -2.495110 |
| C | 2.717853  | 1.189120  | 3.333435  | C | -3.423603 | 0.721044  | -1.262023 |
| C | 6.216781  | -0.704698 | -1.238263 | C | -3.423603 | -0.732459 | -1.255432 |
| C | 1.362572  | -0.711413 | 3.082303  | C | -3.423581 | -1.453350 | 0.006650  |
| C | 2.717889  | -1.158945 | 3.344043  | C | -3.423559 | -0.721043 | 1.262142  |
| C | 5.379932  | -1.434950 | -2.172168 | C | -3.423559 | 0.732460  | 1.255551  |
| C | 6.217788  | 1.425005  | 0.008666  | C | -3.423581 | 1.453350  | -0.006531 |
| C | 6.217434  | 0.731253  | 1.222683  | C | -4.104310 | 3.559267  | -3.659294 |
| C | 4.862162  | -2.606421 | -1.489083 | C | -4.445055 | 4.895654  | -3.664773 |
| C | 5.379711  | -2.599821 | -0.132892 | C | -4.445034 | 5.600240  | -2.456094 |
| C | 3.216614  | -2.293281 | 2.697089  | C | -4.104269 | 4.936731  | -1.296215 |
| C | 4.572867  | -2.295930 | 2.179909  | C | -2.743000 | -1.389994 | -4.911356 |
| C | 6.217470  | -1.424691 | 0.021535  | C | -2.402275 | -0.727090 | -6.071731 |
| C | 3.555737  | 0.015837  | 3.498853  | C | -2.402275 | 0.671995  | -6.078075 |
| C | 5.379961  | 1.184788  | 2.317882  | C | -2.743000 | 1.345396  | -4.923760 |
| C | 6.217349  | -0.720048 | 1.229229  | C | -4.104269 | -4.948283 | -1.251390 |
| C | 4.862103  | 0.013605  | 3.000886  | C | -4.445034 | -5.622284 | -2.405204 |
| C | 5.379863  | -1.163611 | 2.328370  | C | -4.445055 | -4.928689 | -3.620223 |
| C | 5.379772  | 1.415193  | -2.184967 | C | -4.104310 | -3.592307 | -3.626864 |
| C | 4.862192  | 2.593014  | -1.512695 | C | -2.742851 | -3.559267 | 3.659413  |
| C | 5.379620  | 2.598455  | -0.156469 | C | -2.402106 | -4.895654 | 3.664892  |
| C | 3.216353  | -1.189120 | -3.333538 | C | -2.402127 | -5.600240 | 2.456213  |
| C | 4.571822  | -0.739394 | -3.076224 | C | -2.742893 | -4.936730 | 1.296334  |
| C | 1.362257  | 3.026292  | -0.925582 | C | -4.104161 | 1.389995  | 4.911475  |
| C | 2.717534  | 3.476410  | -0.669034 | C | -4.444886 | 0.727091  | 6.071850  |
| C | 4.571736  | 3.034326  | 0.897934  | C | -4.444886 | -0.671995 | 6.078194  |
| C | 3.216536  | 2.317722  | 2.676482  | C | -4.104161 | -1.345395 | 4.923879  |
| C | 4.572813  | 2.315560  | 2.159062  | C | -2.742893 | 4.948284  | 1.251509  |
| C | -3.121246 | 0.698341  | -3.715869 | C | -2.402128 | 5.622285  | 2.405323  |
| C | -3.121246 | -0.732012 | -3.709383 | C | -2.402106 | 4.928689  | 3.620342  |
| C | -3.423624 | -1.448085 | -2.482080 | C | -2.742851 | 3.592308  | 3.626983  |
| C | -3.726023 | -2.869138 | -2.462854 | H | -4.162045 | 3.035837  | -4.594967 |
| C | -3.726001 | -3.578307 | -1.220715 | H | -4.742250 | 5.373327  | -4.594581 |
| C | -3.423581 | -2.873369 | 0.013089  | H | -4.742212 | 6.644690  | -2.413438 |
| C | -3.121160 | -3.567089 | 1.253235  | H | -4.161972 | 5.492354  | -0.379317 |
| C | -3.121139 | -2.846683 | 2.488892  | H | -2.685281 | -2.462103 | -4.925213 |



|   |           |           |           |   |          |           |           |
|---|-----------|-----------|-----------|---|----------|-----------|-----------|
| H | -2.105112 | -1.293849 | -6.950076 | C | 1.356731 | -2.321143 | -2.153174 |
| H | -2.105112 | 1.230765  | -6.961524 | C | 1.357770 | 0.747356  | 3.074184  |
| H | -2.685281 | 2.417335  | -4.947340 | C | 4.566964 | 0.703429  | -3.084279 |
| H | -4.161972 | -5.495569 | -0.329491 | C | 1.067385 | -2.589090 | 1.519291  |
| H | -4.742212 | -6.666305 | -2.353078 | C | 1.357819 | -3.036641 | -0.890190 |
| H | -4.742250 | -5.414774 | -4.545661 | C | 2.713003 | -2.324645 | -2.670600 |
| H | -4.162045 | -3.077384 | -4.567246 | C | 3.551279 | -3.043848 | -1.728805 |
| H | -2.685116 | -3.035836 | 4.595086  | C | 6.212549 | 0.690385  | -1.246591 |
| H | -2.104911 | -5.373326 | 4.594700  | C | 2.713032 | -3.483813 | -0.628500 |
| H | -2.104949 | -6.644690 | 2.413557  | C | 3.212036 | -3.474667 | 0.677900  |
| H | -2.685190 | -5.492354 | 0.379436  | C | 4.567315 | -3.023886 | 0.933270  |
| H | -4.161880 | 2.462104  | 4.925332  | C | 2.373766 | -3.019069 | 1.771790  |
| H | -4.742050 | 1.293850  | 6.950195  | C | 2.713241 | 1.197747  | 3.330320  |
| H | -4.742050 | -1.230765 | 6.961643  | C | 6.212126 | -0.707902 | -1.236491 |
| H | -4.161880 | -2.417334 | 4.947459  | C | 1.357957 | -0.703430 | 3.084122  |
| H | -2.685190 | 5.495569  | 0.329610  | C | 2.713277 | -1.150283 | 3.347008  |
| H | -2.104949 | 6.666305  | 2.353197  | C | 5.375270 | -1.440569 | -2.168494 |
| H | -2.104911 | 5.414775  | 4.545780  | C | 6.213145 | 1.425022  | 0.004920  |
| H | -2.685116 | 3.077385  | 4.567365  | C | 6.212802 | 0.734416  | 1.220728  |

132

cf8, c-HBC\_heterodimers\_with\_C60 with bowl depth: 0.78

|   |           |           |           |   |           |           |           |
|---|-----------|-----------|-----------|---|-----------|-----------|-----------|
| C | -0.287796 | 0.716863  | -1.231189 | C | 6.212827  | -1.424631 | 0.025166  |
| C | 0.549680  | 1.157578  | -2.331483 | C | 3.551126  | 0.024896  | 3.498768  |
| C | 1.356677  | 2.290277  | -2.185962 | C | 5.375339  | 1.190785  | 2.314757  |
| C | 0.549854  | 2.600156  | 0.126052  | C | 6.212717  | -0.716864 | 1.231032  |
| C | -0.287906 | 1.424630  | -0.025324 | C | 4.857488  | 0.021374  | 3.000796  |
| C | 1.067433  | -0.021375 | -3.000953 | C | 5.375241  | -1.157579 | 2.331326  |
| C | 2.712925  | 2.286290  | -2.703145 | C | 5.375110  | 1.409530  | -2.188673 |
| C | 1.067415  | 2.610267  | 1.482217  | C | 4.857536  | 2.589089  | -1.519448 |
| C | -0.287206 | 0.707901  | 1.236334  | C | 5.374976  | 2.598041  | -0.163245 |
| C | -0.287881 | -0.734417 | -1.220886 | C | 3.211680  | -1.197748 | -3.330477 |
| C | 2.373642  | 3.043847  | 1.728647  | C | 4.567151  | -0.747357 | -3.074341 |
| C | 3.211889  | 3.483812  | 0.628343  | C | 1.357606  | 3.023885  | -0.933427 |
| C | 2.373795  | -0.024897 | -3.498925 | C | 2.712885  | 3.474666  | -0.678058 |
| C | 3.551155  | 3.019068  | -1.771947 | C | 4.567102  | 3.036640  | 0.890033  |
| C | 3.211644  | 1.150282  | -3.347165 | C | 3.211918  | 2.324643  | 2.670442  |
| C | 0.549651  | 1.440568  | 2.168337  | C | 4.568190  | 2.321142  | 2.153017  |
| C | -0.287629 | -0.690386 | 1.246433  | C | -3.075721 | 0.689172  | -3.698129 |
| C | -0.288224 | -1.425023 | -0.005077 | C | -3.075721 | -0.741790 | -3.687935 |
| C | 0.549582  | -1.190786 | -2.314915 | C | -3.418289 | -1.449319 | -2.469505 |
| C | 0.549811  | -1.409531 | 2.188516  | C | -3.760890 | -2.858244 | -2.445927 |
| C | 0.549945  | -2.598042 | 0.163088  | C | -3.760857 | -3.564796 | -1.201469 |
|   |           |           |           | C | -3.418224 | -2.863351 | 0.020489  |

|   |           |           |           |                                                        |           |           |           |
|---|-----------|-----------|-----------|--------------------------------------------------------|-----------|-----------|-----------|
| C | -3.075590 | -3.547316 | 1.252316  | H                                                      | -4.262100 | 5.444595  | -0.350893 |
| C | -3.075557 | -2.823105 | 2.486582  | H                                                      | -2.574485 | -2.487769 | -4.856027 |
| C | -3.418158 | -1.413987 | 2.490085  | H                                                      | -1.894607 | -1.306593 | -6.864558 |
| C | -3.760727 | -0.689171 | 3.698310  | H                                                      | -1.894607 | 1.208661  | -6.882477 |
| C | -3.760727 | 0.741791  | 3.688116  | H                                                      | -2.574485 | 2.418332  | -4.890977 |
| C | -3.418158 | 1.449320  | 2.469687  | H                                                      | -4.262100 | -5.449042 | -0.273288 |
| C | -3.075557 | 2.858245  | 2.446108  | H                                                      | -4.942085 | -6.598377 | -2.300148 |
| C | -3.075590 | 3.564798  | 1.201651  | H                                                      | -4.942143 | -5.356583 | -4.487502 |
| C | -3.418224 | 2.863352  | -0.020307 | H                                                      | -4.262213 | -3.027133 | -4.539674 |
| C | -3.760857 | 3.547317  | -1.252135 | H                                                      | -2.574235 | -2.962148 | 4.582522  |
| C | -3.760890 | 2.823106  | -2.486400 | H                                                      | -1.894304 | -5.292104 | 4.563543  |
| C | -3.418289 | 1.413989  | -2.489903 | H                                                      | -1.894362 | -6.564936 | 2.394104  |
| C | -3.418257 | 0.714944  | -1.258783 | H                                                      | -2.574347 | -5.444594 | 0.351074  |
| C | -3.418257 | -0.732805 | -1.248470 | H                                                      | -4.261962 | 2.487770  | 4.856208  |
| C | -3.418224 | -1.447772 | 0.010404  | H                                                      | -4.941840 | 1.306594  | 6.864740  |
| C | -3.418190 | -0.714943 | 1.258965  | H                                                      | -4.941840 | -1.208660 | 6.882658  |
| C | -3.418190 | 0.732807  | 1.248651  | H                                                      | -4.261962 | -2.418331 | 4.891159  |
| C | -3.418224 | 1.447773  | -0.010223 | H                                                      | -2.574347 | 5.449043  | 0.273469  |
| C | -4.196225 | 3.504622  | -3.653487 | H                                                      | -1.894362 | 6.598378  | 2.300330  |
| C | -4.595401 | 4.826347  | -3.644740 | H                                                      | -1.894305 | 5.356584  | 4.487683  |
| C | -4.595369 | 5.535835  | -2.435530 | H                                                      | -2.574235 | 3.027134  | 4.539855  |
| C | -4.196162 | 4.898580  | -1.277621 |                                                        |           |           |           |
| C | -2.640448 | -1.412029 | -4.861580 |                                                        |           |           |           |
| C | -2.241301 | -0.743790 | -6.001979 |                                                        |           |           |           |
| C | -2.241301 | 0.658204  | -6.011967 | 132                                                    |           |           |           |
| C | -2.640448 | 1.342623  | -4.881204 | cf9, c-HBC_heterodimers_with_C60 with bowl depth: 0.88 |           |           |           |
| C | -4.196162 | -4.916285 | -1.207701 | C                                                      | -0.287811 | 0.699837  | -1.240942 |
| C | -4.595369 | -5.569973 | -2.356413 | C                                                      | 0.549652  | 1.125356  | -2.347212 |
| C | -4.595401 | -4.877784 | -3.575609 | C                                                      | 1.356651  | 2.259952  | -2.217314 |
| C | -4.196225 | -3.556317 | -3.603186 | C                                                      | 0.549856  | 2.601645  | 0.090221  |
| C | -2.640222 | -3.504620 | 3.653669  | C                                                      | -0.287906 | 1.424146  | -0.044939 |
| C | -2.241046 | -4.826346 | 3.644921  | C                                                      | 1.067397  | -0.062706 | -3.000387 |
| C | -2.241078 | -5.535834 | 2.435711  | C                                                      | 2.712893  | 2.248842  | -2.734410 |
| C | -2.640286 | -4.898579 | 1.277802  | C                                                      | 1.067433  | 2.630434  | 1.446112  |
| C | -4.195999 | 1.412031  | 4.861762  | C                                                      | -0.287191 | 0.724862  | 1.226470  |
| C | -4.595146 | 0.743791  | 6.002161  | C                                                      | -0.287896 | -0.751162 | -1.210651 |
| C | -4.595146 | -0.658203 | 6.012148  | C                                                      | 2.373662  | 3.067366  | 1.686533  |
| C | -4.195999 | -1.342622 | 4.881386  | C                                                      | 3.211896  | 3.492134  | 0.580263  |
| C | -2.640286 | 4.916286  | 1.207883  | C                                                      | 2.373753  | -0.073086 | -3.498279 |
| C | -2.241078 | 5.569974  | 2.356594  | C                                                      | 3.551134  | 2.994376  | -1.813403 |
| C | -2.241046 | 4.877786  | 3.575790  | C                                                      | 3.211604  | 1.104072  | -3.362729 |
| C | -2.640222 | 3.556319  | 3.603367  | C                                                      | 0.549677  | 1.470296  | 2.148284  |
| H | -4.262213 | 2.962149  | -4.582341 | C                                                      | -0.287614 | -0.673154 | 1.255827  |
| H | -4.942143 | 5.292105  | -4.563362 | C                                                      | -0.288224 | -1.424958 | 0.014554  |
| H | -4.942085 | 6.564937  | -2.393922 | C                                                      | 0.549554  | -1.222556 | -2.298301 |

|   |           |           |           |   |           |           |           |
|---|-----------|-----------|-----------|---|-----------|-----------|-----------|
| C | 0.549837  | -1.379255 | 2.207715  | C | -3.801612 | -3.565103 | -1.142652 |
| C | 0.549947  | -2.595550 | 0.198849  | C | -3.418224 | -2.854735 | 0.059796  |
| C | 1.356705  | -2.350579 | -2.121017 | C | -3.034835 | -3.514242 | 1.290874  |
| C | 1.357806  | 0.789625  | 3.063583  | C | -3.034787 | -2.772105 | 2.516066  |
| C | 4.566927  | 0.660882  | -3.093729 | C | -3.418129 | -1.375511 | 2.502128  |
| C | 1.067403  | -2.567919 | 1.554794  | C | -3.801425 | -0.639221 | 3.688919  |
| C | 1.357809  | -3.048614 | -0.848298 | C | -3.801425 | 0.792794  | 3.658990  |
| C | 2.712971  | -2.361207 | -2.638361 | C | -3.418129 | 1.478854  | 2.442471  |
| C | 3.551258  | -3.067371 | -1.686760 | C | -3.034787 | 2.874811  | 2.398044  |
| C | 6.212535  | 0.673149  | -1.256054 | C | -3.034835 | 3.565108  | 1.142913  |
| C | 2.713024  | -3.492139 | -0.580490 | C | -3.418224 | 2.854740  | -0.059534 |
| C | 3.212043  | -3.465001 | 0.725655  | C | -3.801612 | 3.514247  | -1.290612 |
| C | 4.567325  | -3.010747 | 0.974775  | C | -3.801660 | 2.772111  | -2.515804 |
| C | 2.373787  | -2.994380 | 1.813176  | C | -3.418318 | 1.375516  | -2.501866 |
| C | 2.713280  | 1.243501  | 3.313476  | C | -3.418271 | 0.695281  | -1.264334 |
| C | 6.212112  | -0.724867 | -1.226697 | C | -3.418271 | -0.747500 | -1.234180 |
| C | 1.357993  | -0.660886 | 3.093502  | C | -3.418224 | -1.442870 | 0.030287  |
| C | 2.713316  | -1.104076 | 3.362502  | C | -3.418176 | -0.695275 | 1.264596  |
| C | 5.375244  | -1.470301 | -2.148511 | C | -3.418176 | 0.747506  | 1.234442  |
| C | 6.213145  | 1.424953  | -0.014781 | C | -3.418224 | 1.442876  | -0.030025 |
| C | 6.212816  | 0.751158  | 1.210424  | C | -4.293505 | 3.409381  | -3.684038 |
| C | 4.857488  | -2.630439 | -1.446339 | C | -4.744395 | 4.715955  | -3.676811 |
| C | 5.375065  | -2.601650 | -0.090448 | C | -4.744348 | 5.443613  | -2.475672 |
| C | 3.212027  | -2.248846 | 2.734183  | C | -4.293413 | 4.844918  | -1.314324 |
| C | 4.568270  | -2.259957 | 2.217087  | C | -2.543265 | -1.485829 | -4.794941 |
| C | 6.212827  | -1.424151 | 0.044712  | C | -2.092417 | -0.826137 | -5.922783 |
| C | 3.551168  | 0.073081  | 3.498052  | C | -2.092417 | 0.577948  | -5.952129 |
| C | 5.375366  | 1.222552  | 2.298074  | C | -2.543265 | 1.284188  | -4.852835 |
| C | 6.212731  | -0.699842 | 1.240715  | C | -4.293413 | -4.895603 | -1.110745 |
| C | 4.857523  | 0.062701  | 3.000160  | C | -4.744348 | -5.542298 | -2.246064 |
| C | 5.375268  | -1.125361 | 2.346985  | C | -4.744395 | -4.865462 | -3.476557 |
| C | 5.375084  | 1.379251  | -2.207942 | C | -4.293505 | -3.560331 | -3.538369 |
| C | 4.857518  | 2.567914  | -1.555021 | C | -2.542942 | -3.409375 | 3.684300  |
| C | 5.374974  | 2.595545  | -0.199076 | C | -2.092052 | -4.715950 | 3.677073  |
| C | 3.211640  | -1.243506 | -3.313703 | C | -2.092099 | -5.443607 | 2.475934  |
| C | 4.567114  | -0.789630 | -3.063810 | C | -2.543034 | -4.844913 | 1.314586  |
| C | 1.357595  | 3.010742  | -0.975002 | C | -4.293182 | 1.485834  | 4.795203  |
| C | 2.712877  | 3.464997  | -0.725882 | C | -4.744030 | 0.826142  | 5.923045  |
| C | 4.567112  | 3.048610  | 0.848071  | C | -4.744030 | -0.577943 | 5.952391  |
| C | 3.211949  | 2.361202  | 2.638134  | C | -4.293182 | -1.284183 | 4.853097  |
| C | 4.568216  | 2.350575  | 2.120790  | C | -2.543034 | 4.895608  | 1.111007  |
| C | -3.035022 | 0.639227  | -3.688657 | C | -2.092099 | 5.542304  | 2.246325  |
| C | -3.035022 | -0.792789 | -3.658728 | C | -2.092053 | 4.865468  | 3.476819  |
| C | -3.418318 | -1.478849 | -2.442209 | C | -2.542942 | 3.560336  | 3.538631  |
| C | -3.801660 | -2.874806 | -2.397782 | H | -4.367750 | 2.840235  | -4.599961 |

|   |           |           |           |   |           |           |           |
|---|-----------|-----------|-----------|---|-----------|-----------|-----------|
| H | -5.134953 | 5.157589  | -4.589871 | C | -0.292867 | -1.425018 | -0.006376 |
| H | -5.134870 | 6.457376  | -2.444442 | C | 0.544969  | -1.188681 | -2.315989 |
| H | -4.367586 | 5.393100  | -0.385706 | C | 0.545140  | -1.411520 | 2.187241  |
| H | -2.469056 | -2.563720 | -4.760204 | C | 0.545301  | -2.598189 | 0.160733  |
| H | -1.701926 | -1.395827 | -6.761944 | C | 1.352116  | -2.319185 | -2.155266 |
| H | -1.701926 | 1.112079  | -6.814360 | C | 1.353088  | 0.744561  | 3.074880  |
| H | -2.469056 | 2.362590  | -4.863165 | C | 4.562360  | 0.706233  | -3.083580 |
| H | -4.367586 | -5.404506 | -0.160034 | C | 1.062723  | -2.590470 | 1.516951  |
| H | -5.134870 | -6.553871 | -2.172504 | C | 1.353188  | -3.035831 | -0.892933 |
| H | -5.134953 | -5.344860 | -4.370367 | C | 2.708395  | -2.322216 | -2.672677 |
| H | -4.367750 | -3.029951 | -4.477272 | C | 3.546659  | -3.042275 | -1.731525 |
| H | -2.468698 | -2.840229 | 4.600223  | C | 6.207923  | 0.691519  | -1.245883 |
| H | -1.701494 | -5.157583 | 4.590133  | C | 2.708398  | -3.483240 | -0.631632 |
| H | -1.701577 | -6.457370 | 2.444704  | C | 3.207385  | -3.475282 | 0.674783  |
| H | -2.468861 | -5.393094 | 0.385968  | C | 4.562660  | -3.024733 | 0.930579  |
| H | -4.367391 | 2.563726  | 4.760466  | C | 2.369101  | -3.020678 | 1.769075  |
| H | -5.134521 | 1.395833  | 6.762206  | C | 2.708555  | 1.194719  | 3.331442  |
| H | -5.134521 | -1.112074 | 6.814622  | C | 6.207500  | -0.706777 | -1.237055 |
| H | -4.367391 | -2.362584 | 4.863427  | C | 1.353275  | -0.706234 | 3.083499  |
| H | -2.468861 | 5.404511  | 0.160296  | C | 2.708591  | -1.153325 | 3.345996  |
| H | -1.701577 | 6.553876  | 2.172766  | C | 5.370655  | -1.438597 | -2.169734 |
| H | -1.701494 | 5.344865  | 4.370629  | C | 6.208502  | 1.425018  | 0.006295  |
| H | -2.468698 | 3.029957  | 4.477534  | C | 6.208143  | 0.733306  | 1.221475  |
|   |           |           |           | C | 4.852882  | -2.608919 | -1.484684 |
|   |           |           |           | C | 5.370426  | -2.600041 | -0.128504 |
|   |           |           |           | C | 3.207318  | -2.288747 | 2.700950  |
|   |           |           |           | C | 4.563573  | -2.292264 | 2.183780  |
|   |           |           |           | C | 6.208184  | -1.424653 | 0.023951  |
|   |           |           |           | C | 3.546439  | 0.021715  | 3.498835  |
|   |           |           |           | C | 5.370666  | 1.188681  | 2.315908  |
|   |           |           |           | C | 6.208058  | -0.717982 | 1.230460  |
|   |           |           |           | C | 4.852807  | 0.018647  | 3.000877  |
|   |           |           |           | C | 5.370568  | -1.159697 | 2.330341  |
|   |           |           |           | C | 5.370495  | 1.411520  | -2.187322 |
|   |           |           |           | C | 4.852912  | 2.590469  | -1.517032 |
|   |           |           |           | C | 5.370335  | 2.598189  | -0.160814 |
|   |           |           |           | C | 3.207080  | -1.194719 | -3.331524 |
|   |           |           |           | C | 4.562547  | -0.744561 | -3.074961 |
|   |           |           |           | C | 1.352975  | 3.024733  | -0.930660 |
|   |           |           |           | C | 2.708251  | 3.475281  | -0.674864 |
|   |           |           |           | C | 4.562447  | 3.035830  | 0.892852  |
|   |           |           |           | C | 3.207240  | 2.322215  | 2.672596  |
|   |           |           |           | C | 4.563519  | 2.319185  | 2.155185  |
|   |           |           |           | C | -2.990414 | 0.694217  | -3.660150 |
|   |           |           |           | C | -2.990414 | -0.739655 | -3.651239 |

132  
cf10, c-HBC\_heterodimers\_with\_C60 with bowl depth: 0.97

|   |           |           |           |   |           |           |           |
|---|-----------|-----------|-----------|---|-----------|-----------|-----------|
| C | -0.292423 | 0.717982  | -1.230541 | C | 3.546439  | 0.021715  | 3.498835  |
| C | 0.545067  | 1.159697  | -2.330423 | C | 5.370666  | 1.188681  | 2.315908  |
| C | 1.352062  | 2.292263  | -2.183861 | C | 6.208058  | -0.717982 | 1.230460  |
| C | 0.545210  | 2.600040  | 0.128423  | C | 4.852807  | 0.018647  | 3.000877  |
| C | -0.292549 | 1.424652  | -0.024032 | C | 5.370568  | -1.159697 | 2.330341  |
| C | 1.062828  | -0.018647 | -3.000958 | C | 5.370495  | 1.411520  | -2.187322 |
| C | 2.708317  | 2.288746  | -2.701031 | C | 4.852912  | 2.590469  | -1.517032 |
| C | 1.062753  | 2.608919  | 1.484603  | C | 5.370335  | 2.598189  | -0.160814 |
| C | -0.291864 | 0.706777  | 1.236974  | C | 3.207080  | -1.194719 | -3.331524 |
| C | -0.292508 | -0.733307 | -1.221556 | C | 4.562547  | -0.744561 | -3.074961 |
| C | 2.368977  | 3.042274  | 1.731444  | C | 1.352975  | 3.024733  | -0.930660 |
| C | 3.207238  | 3.483239  | 0.631551  | C | 2.708251  | 3.475281  | -0.674864 |
| C | 2.369197  | -0.021716 | -3.498916 | C | 4.562447  | 3.035830  | 0.892852  |
| C | 3.546535  | 3.020678  | -1.769156 | C | 3.207240  | 2.322215  | 2.672596  |
| C | 3.207044  | 1.153325  | -3.346077 | C | 4.563519  | 2.319185  | 2.155185  |
| C | 0.544980  | 1.438596  | 2.169653  | C | -2.990414 | 0.694217  | -3.660150 |
| C | -0.292287 | -0.691519 | 1.245802  | C | -2.990414 | -0.739655 | -3.651239 |

|   |           |           |           |
|---|-----------|-----------|-----------|
| C | -3.412900 | -1.439133 | -2.457306 |
| C | -3.835403 | -2.822710 | -2.431060 |
| C | -3.835386 | -3.531935 | -1.184841 |
| C | -3.412866 | -2.847612 | 0.017744  |
| C | -2.990347 | -3.516935 | 1.228741  |
| C | -2.990330 | -2.792275 | 2.466050  |
| C | -3.412833 | -1.408479 | 2.475097  |
| C | -3.835319 | -0.694216 | 3.660244  |
| C | -3.835319 | 0.739656  | 3.651332  |
| C | -3.412833 | 1.439134  | 2.457400  |
| C | -2.990330 | 2.822710  | 2.431154  |
| C | -2.990347 | 3.531935  | 1.184934  |
| C | -3.412866 | 2.847612  | -0.017650 |
| C | -3.835386 | 3.516935  | -1.228648 |
| C | -3.835403 | 2.792276  | -2.465956 |
| C | -3.412900 | 1.408480  | -2.475003 |
| C | -3.412884 | 0.711651  | -1.250449 |
| C | -3.412884 | -0.727138 | -1.241507 |
| C | -3.412866 | -1.438717 | 0.008988  |
| C | -3.412849 | -0.711650 | 1.250543  |
| C | -3.412849 | 0.727138  | 1.241601  |
| C | -3.412866 | 1.438717  | -0.008895 |
| C | -4.385297 | 3.416681  | -3.613959 |
| C | -4.891645 | 4.703528  | -3.568810 |
| C | -4.891628 | 5.414170  | -2.355334 |
| C | -4.385264 | 4.823711  | -1.211169 |
| C | -2.440551 | -1.421782 | -4.765902 |
| C | -1.934217 | -0.739540 | -5.857863 |
| C | -1.934217 | 0.666675  | -5.866602 |
| C | -2.440551 | 1.362436  | -4.783205 |
| C | -4.385264 | -4.838392 | -1.151121 |
| C | -4.891628 | -5.443026 | -2.287859 |
| C | -4.891645 | -4.747522 | -3.510074 |
| C | -4.385297 | -3.461335 | -3.571214 |
| C | -2.440436 | -3.416680 | 3.614053  |
| C | -1.934088 | -4.703527 | 3.568903  |
| C | -1.934105 | -5.414169 | 2.355427  |
| C | -2.440469 | -4.823711 | 1.211262  |
| C | -4.385182 | 1.421782  | 4.765995  |
| C | -4.891516 | 0.739540  | 5.857956  |
| C | -4.891516 | -0.666675 | 5.866695  |
| C | -4.385182 | -1.362436 | 4.783299  |
| C | -2.440469 | 4.838393  | 1.151215  |
| C | -1.934105 | 5.443027  | 2.287952  |
| C | -1.934088 | 4.747522  | 3.510167  |

|   |           |           |           |
|---|-----------|-----------|-----------|
| C | -2.440436 | 3.461335  | 3.571307  |
| H | -4.467763 | 2.847814  | -4.532555 |
| H | -5.329797 | 5.143146  | -4.461017 |
| H | -5.329767 | 6.407361  | -2.302029 |
| H | -4.467705 | 5.346224  | -0.265514 |
| H | -2.358096 | -2.501711 | -4.732163 |
| H | -1.496088 | -1.292510 | -6.684622 |
| H | -1.496088 | 1.209327  | -6.700170 |
| H | -2.358097 | 2.442702  | -4.762891 |
| H | -4.467705 | -5.349111 | -0.199045 |
| H | -5.329767 | -6.435479 | -2.222214 |
| H | -5.329797 | -5.198195 | -4.396748 |
| H | -4.467763 | -2.903929 | -4.496810 |
| H | -2.357970 | -2.847813 | 4.532649  |
| H | -1.495936 | -5.143145 | 4.461110  |
| H | -1.495965 | -6.407361 | 2.302122  |
| H | -2.358028 | -5.346224 | 0.265607  |
| H | -4.467636 | 2.501712  | 4.732256  |
| H | -5.329645 | 1.292511  | 6.684716  |
| H | -5.329645 | -1.209327 | 6.700264  |
| H | -4.467636 | -2.442701 | 4.762985  |
| H | -2.358028 | 5.349112  | 0.199138  |
| H | -1.495965 | 6.435479  | 2.222307  |
| H | -1.495936 | 5.198195  | 4.396842  |
| H | -2.357970 | 2.903930  | 4.496903  |

132

cf11, c-HBC\_heterodimers\_with\_C60 with bowl depth: 1.07

|   |           |           |           |
|---|-----------|-----------|-----------|
| C | -0.292383 | -0.720969 | 1.228803  |
| C | 0.545143  | -1.165354 | 2.327581  |
| C | 1.352133  | -2.297562 | 2.178242  |
| C | 0.545205  | -2.599721 | -0.134756 |
| C | -0.292548 | -1.424706 | 0.020581  |
| C | 1.062927  | 0.011357  | 3.000959  |
| C | 2.708405  | -2.295301 | 2.695374  |
| C | 1.062704  | -2.605305 | -1.490971 |
| C | -0.291905 | -0.703770 | -1.238677 |
| C | -0.292468 | 0.730337  | 1.223344  |
| C | 2.368919  | -3.038059 | -1.738908 |
| C | 3.207216  | -3.481695 | -0.640116 |
| C | 2.369312  | 0.013216  | 3.498881  |
| C | 3.546592  | -3.024967 | 1.761696  |
| C | 3.207154  | -1.161450 | 3.343160  |

|   |           |           |           |   |           |           |           |
|---|-----------|-----------|-----------|---|-----------|-----------|-----------|
| C | 0.544909  | -1.433322 | -2.173159 | C | -2.951477 | -0.704263 | 3.641807  |
| C | -0.292328 | 0.694544  | -1.244108 | C | -2.951477 | 0.731814  | 3.636370  |
| C | -0.292866 | 1.424998  | 0.009847  | C | -3.412819 | 1.430764  | 2.456698  |
| C | 0.545045  | 1.183051  | 2.318852  | C | -3.874140 | 2.801859  | 2.430678  |
| C | 0.545069  | 1.416829  | -2.183823 | C | -3.874163 | 3.514952  | 1.184184  |
| C | 0.545296  | 2.598572  | -0.154439 | C | -3.412866 | 2.842337  | -0.010694 |
| C | 1.352187  | 2.313942  | 2.160849  | C | -2.951569 | 3.505886  | -1.210630 |
| C | 1.352987  | -0.737089 | -3.076724 | C | -2.951593 | 2.783377  | -2.451689 |
| C | 4.562462  | -0.713723 | 3.081705  | C | -3.412914 | 1.412124  | -2.467329 |
| C | 1.062674  | 2.594147  | -1.510688 | C | -3.874256 | 0.704264  | -3.641676 |
| C | 1.353218  | 3.033653  | 0.900261  | C | -3.874256 | -0.731814 | -3.636240 |
| C | 2.708483  | 2.315716  | 2.678221  | C | -3.412914 | -1.430763 | -2.456567 |
| C | 3.546716  | 3.038059  | 1.738794  | C | -2.951593 | -2.801859 | -2.430547 |
| C | 6.207963  | -0.694544 | 1.243995  | C | -2.951569 | -3.514951 | -1.184053 |
| C | 2.708419  | 3.481695  | 0.640003  | C | -3.412866 | -2.842336 | 0.010825  |
| C | 3.207363  | 3.476910  | -0.666444 | C | -3.874163 | -3.505886 | 1.210761  |
| C | 4.562630  | 3.026984  | -0.923378 | C | -3.874140 | -2.783377 | 2.451820  |
| C | 2.369043  | 3.024966  | -1.761810 | C | -3.412819 | -1.412124 | 2.467460  |
| C | 2.708446  | -1.186623 | -3.334424 | C | -3.412843 | -0.713264 | 1.246449  |
| C | 6.207540  | 0.703769  | 1.238564  | C | -3.412843 | 0.722680  | 1.241014  |
| C | 1.353174  | 0.713722  | -3.081819 | C | -3.412866 | 1.435831  | -0.005370 |
| C | 2.708482  | 1.161450  | -3.343273 | C | -3.412890 | 0.713264  | -1.246318 |
| C | 5.370726  | 1.433321  | 2.173046  | C | -3.412890 | -0.722679 | -1.240883 |
| C | 6.208501  | -1.424999 | -0.009961 | C | -3.412866 | -1.435830 | 0.005501  |
| C | 6.208103  | -0.730338 | -1.223457 | C | -4.482417 | -3.380532 | 3.584561  |
| C | 4.852931  | 2.605304  | 1.490857  | C | -5.041143 | -4.645838 | 3.518295  |
| C | 5.370430  | 2.599720  | 0.134643  | C | -5.041167 | -5.353682 | 2.302044  |
| C | 3.207230  | 2.295301  | -2.695487 | C | -4.482463 | -4.785669 | 1.169561  |
| C | 4.563502  | 2.297561  | -2.178355 | C | -2.343157 | 1.414604  | 4.719415  |
| C | 6.208183  | 1.424706  | -0.020694 | C | -1.784411 | 0.725475  | 5.782531  |
| C | 3.546323  | -0.013216 | -3.498994 | C | -1.784411 | -0.681676 | 5.787858  |
| C | 5.370590  | -1.183052 | -2.318965 | C | -2.343157 | -1.378834 | 4.729989  |
| C | 6.208018  | 0.720968  | -1.228916 | C | -4.482463 | 4.794386  | 1.133296  |
| C | 4.852708  | -0.011357 | -3.001073 | C | -5.041167 | 5.370957  | 2.261447  |
| C | 5.370492  | 1.165354  | -2.327694 | C | -5.041143 | 4.672341  | 3.483022  |
| C | 5.370566  | -1.416830 | 2.183710  | C | -4.482417 | 3.407573  | 3.558865  |
| C | 4.852961  | -2.594147 | 1.510575  | C | -2.343316 | 3.380533  | -3.584430 |
| C | 5.370339  | -2.598572 | 0.154326  | C | -1.784590 | 4.645839  | -3.518164 |
| C | 3.207190  | 1.186622  | 3.334311  | C | -1.784566 | 5.353683  | -2.301913 |
| C | 4.562649  | 0.737088  | 3.076610  | C | -2.343269 | 4.785670  | -1.169430 |
| C | 1.353005  | -3.026985 | 0.923265  | C | -4.482576 | -1.414604 | -4.719284 |
| C | 2.708272  | -3.476911 | 0.666330  | C | -5.041321 | -0.725475 | -5.782401 |
| C | 4.562417  | -3.033653 | -0.900374 | C | -5.041321 | 0.681677  | -5.787727 |
| C | 3.207152  | -2.315716 | -2.678335 | C | -4.482576 | 1.378834  | -4.729858 |
| C | 4.563448  | -2.313943 | -2.160963 | C | -2.343270 | -4.794386 | -1.133165 |

|   |           |           |           |
|---|-----------|-----------|-----------|
| C | -1.784566 | -5.370956 | -2.261316 |
| C | -1.784590 | -4.672341 | -3.482891 |
| C | -2.343316 | -3.407573 | -3.558734 |
| H | -4.573099 | -2.804369 | 4.499827  |
| H | -5.523603 | -5.069746 | 4.395220  |
| H | -5.523644 | -6.325481 | 2.237288  |
| H | -4.573182 | -5.295258 | 0.215624  |
| H | -2.252458 | 2.495204  | 4.676536  |
| H | -1.301920 | 1.273366  | 6.587790  |
| H | -1.301920 | -1.223454 | 6.597242  |
| H | -2.252458 | -2.459727 | 4.695293  |
| H | -4.573182 | 5.296738  | 0.175529  |
| H | -5.523644 | 6.342238  | 2.189335  |
| H | -5.523602 | 5.102876  | 4.356713  |
| H | -4.573099 | 2.838356  | 4.478466  |
| H | -2.252633 | 2.804370  | -4.499696 |
| H | -1.302130 | 5.069746  | -4.395090 |
| H | -1.302089 | 6.325482  | -2.237157 |
| H | -2.252551 | 5.295258  | -0.215493 |
| H | -4.573275 | -2.495203 | -4.676405 |
| H | -5.523813 | -1.273365 | -6.587659 |
| H | -5.523813 | 1.223455  | -6.597111 |
| H | -4.573275 | 2.459728  | -4.695162 |
| H | -2.252551 | -5.296738 | -0.175398 |
| H | -1.302089 | -6.342237 | -2.189204 |
| H | -1.302130 | -5.102875 | -4.356582 |
| H | -2.252634 | -2.838356 | -4.478336 |

132

cf12, c-HBC\_heterodimers\_with\_C60 with bowl depth: 1.17

|   |           |           |           |
|---|-----------|-----------|-----------|
| C | -0.292393 | -0.718384 | 1.230313  |
| C | 0.545124  | -1.160458 | 2.330030  |
| C | 1.352115  | -2.292977 | 2.183079  |
| C | 0.545206  | -2.599998 | -0.129286 |
| C | -0.292548 | -1.424660 | 0.023574  |
| C | 1.062902  | 0.017666  | 3.000937  |
| C | 2.708383  | -2.289629 | 2.700216  |
| C | 1.062716  | -2.608433 | -1.485481 |
| C | -0.291895 | -0.706373 | -1.237197 |
| C | -0.292478 | 0.732907  | 1.221803  |
| C | 2.368933  | -3.041708 | -1.732497 |
| C | 3.207221  | -3.483033 | -0.632769 |
| C | 2.369283  | 0.020572  | 3.498865  |

|   |           |           |           |
|---|-----------|-----------|-----------|
| C | 3.546578  | -3.021256 | 1.768081  |
| C | 3.207126  | -1.154419 | 3.345621  |
| C | 0.544927  | -1.437887 | -2.170137 |
| C | -0.292318 | 0.691926  | -1.245568 |
| C | -0.292866 | 1.425016  | 0.006849  |
| C | 0.545026  | 1.187924  | 2.316364  |
| C | 0.545087  | 1.412235  | -2.186793 |
| C | 0.545297  | 2.598242  | -0.159898 |
| C | 1.352169  | 2.318480  | 2.155991  |
| C | 1.353012  | -0.743556 | -3.075156 |
| C | 4.562436  | -0.707242 | 3.083237  |
| C | 1.062686  | 2.590965  | -1.516130 |
| C | 1.353211  | 3.035539  | 0.893892  |
| C | 2.708461  | 2.321342  | 2.673369  |
| C | 3.546702  | 3.041708  | 1.732432  |
| C | 6.207953  | -0.691927 | 1.245503  |
| C | 2.708414  | 3.483033  | 0.632704  |
| C | 3.207368  | 3.475501  | -0.673726 |
| C | 4.562638  | 3.025036  | -0.929703 |
| C | 2.369057  | 3.021256  | -1.768146 |
| C | 2.708473  | -1.193630 | -3.331900 |
| C | 6.207530  | 0.706372  | 1.237132  |
| C | 1.353199  | 0.707241  | -3.083301 |
| C | 2.708509  | 1.154418  | -3.345686 |
| C | 5.370708  | 1.437887  | 2.170072  |
| C | 6.208501  | -1.425016 | -0.006914 |
| C | 6.208113  | -0.732908 | -1.221868 |
| C | 4.852919  | 2.608433  | 1.485417  |
| C | 5.370429  | 2.599998  | 0.129221  |
| C | 3.207252  | 2.289629  | -2.700281 |
| C | 4.563520  | 2.292977  | -2.183144 |
| C | 6.208183  | 1.424659  | -0.023639 |
| C | 3.546352  | -0.020572 | -3.498929 |
| C | 5.370609  | -1.187924 | -2.316429 |
| C | 6.208028  | 0.718383  | -1.230378 |
| C | 4.852733  | -0.017667 | -3.001002 |
| C | 5.370511  | 1.160458  | -2.330095 |
| C | 5.370548  | -1.412235 | 2.186728  |
| C | 4.852949  | -2.590966 | 1.516065  |
| C | 5.370338  | -2.598242 | 0.159833  |
| C | 3.207162  | 1.193630  | 3.331835  |
| C | 4.562623  | 0.743555  | 3.075091  |
| C | 1.352998  | -3.025037 | 0.929638  |
| C | 2.708267  | -3.475502 | 0.673661  |
| C | 4.562425  | -3.035539 | -0.893957 |

|   |           |           |           |
|---|-----------|-----------|-----------|
| C | 3.207174  | -2.321342 | -2.673434 |
| C | 4.563466  | -2.318481 | -2.156056 |
| C | -2.912924 | -0.697747 | 3.626221  |
| C | -2.912924 | 0.740399  | 3.617753  |
| C | -3.412839 | 1.433727  | 2.450071  |
| C | -3.912743 | 2.791447  | 2.417234  |
| C | -3.912756 | 3.503001  | 1.167486  |
| C | -3.412866 | 2.838277  | -0.016674 |
| C | -2.912976 | 3.489011  | -1.208580 |
| C | -2.912990 | 2.762790  | -2.449862 |
| C | -3.412893 | 1.404778  | -2.466709 |
| C | -3.912809 | 0.697747  | -3.626146 |
| C | -3.912809 | -0.740398 | -3.617678 |
| C | -3.412893 | -1.433727 | -2.449997 |
| C | -2.912990 | -2.791446 | -2.417159 |
| C | -2.912976 | -3.503000 | -1.167411 |
| C | -3.412866 | -2.838277 | 0.016749  |
| C | -3.912756 | -3.489010 | 1.208655  |
| C | -3.912743 | -2.762789 | 2.449937  |
| C | -3.412839 | -1.404777 | 2.466784  |
| C | -3.412853 | -0.709493 | 1.245889  |
| C | -3.412853 | 0.724114  | 1.237448  |
| C | -3.412866 | 1.433323  | -0.008402 |
| C | -3.412880 | 0.709493  | -1.245815 |
| C | -3.412880 | -0.724114 | -1.237374 |
| C | -3.412866 | -1.433323 | 0.008477  |
| C | -4.579685 | -3.325046 | 3.567294  |
| C | -5.193979 | -4.564114 | 3.485226  |
| C | -5.193992 | -5.274732 | 2.270363  |
| C | -4.579711 | -4.738432 | 1.150397  |
| C | -2.245958 | 1.427199  | 4.663076  |
| C | -1.631654 | 0.737230  | 5.695466  |
| C | -1.631654 | -0.670112 | 5.703752  |
| C | -2.245958 | -1.372190 | 4.679559  |
| C | -4.579711 | 4.751650  | 1.094520  |
| C | -5.193992 | 5.301101  | 2.208093  |
| C | -5.193978 | 4.604837  | 3.431240  |
| C | -4.579685 | 3.366822  | 3.527893  |
| C | -2.246048 | 3.325046  | -3.567219 |
| C | -1.631754 | 4.564114  | -3.485151 |
| C | -1.631741 | 5.274732  | -2.270288 |
| C | -2.246022 | 4.738432  | -1.150322 |
| C | -4.579775 | -1.427199 | -4.663002 |
| C | -5.194079 | -0.737229 | -5.695391 |
| C | -5.194079 | 0.670112  | -5.703677 |

|   |           |           |           |
|---|-----------|-----------|-----------|
| C | -4.579775 | 1.372191  | -4.679484 |
| C | -2.246022 | -4.751649 | -1.094445 |
| C | -1.631741 | -5.301100 | -2.208018 |
| C | -1.631754 | -4.604837 | -3.431165 |
| C | -2.246048 | -3.366822 | -3.527818 |
| H | -4.678620 | -2.738067 | 4.475926  |
| H | -5.723572 | -4.961935 | 4.347104  |
| H | -5.723596 | -6.220908 | 2.194494  |
| H | -4.678667 | -5.241863 | 0.192931  |
| H | -2.147014 | 2.507633  | 4.608246  |
| H | -1.102042 | 1.285084  | 6.470643  |
| H | -1.102042 | -1.208800 | 6.485327  |
| H | -2.147014 | -2.453195 | 4.637455  |
| H | -4.678667 | 5.243771  | 0.131192  |
| H | -5.723596 | 6.246318  | 2.121088  |
| H | -5.723572 | 5.012780  | 4.288374  |
| H | -4.678620 | 2.790583  | 4.443374  |
| H | -2.147113 | 2.738067  | -4.475851 |
| H | -1.102161 | 4.961935  | -4.347029 |
| H | -1.102137 | 6.220908  | -2.194420 |
| H | -2.147066 | 5.241863  | -0.192856 |
| H | -4.678719 | -2.507633 | -4.608171 |
| H | -5.723690 | -1.285084 | -6.470568 |
| H | -5.723690 | 1.208801  | -6.485252 |
| H | -4.678719 | 2.453195  | -4.637380 |
| H | -2.147066 | -5.243771 | -0.131117 |
| H | -1.102137 | -6.246317 | -2.121013 |
| H | -1.102161 | -5.012780 | -4.288299 |
| H | -2.147113 | -2.790583 | -4.443299 |

132

cf13, c-HBC\_heterodimers\_with\_C60 with bowl depth: 1.26

|   |           |           |           |
|---|-----------|-----------|-----------|
| C | -0.287734 | -0.719484 | 1.229674  |
| C | 0.549798  | -1.162542 | 2.328984  |
| C | 1.356788  | -2.294929 | 2.181009  |
| C | 0.549847  | -2.599882 | -0.131619 |
| C | -0.287905 | -1.424680 | 0.022303  |
| C | 1.067586  | 0.014982  | 3.000937  |
| C | 2.713062  | -2.292044 | 2.698130  |
| C | 1.067339  | -2.607104 | -1.487828 |
| C | -0.287269 | -0.705266 | -1.237825 |
| C | -0.287819 | 0.731814  | 1.222462  |
| C | 2.373552  | -3.040158 | -1.735249 |



|   |           |           |           |   |           |           |           |
|---|-----------|-----------|-----------|---|-----------|-----------|-----------|
| C | 3.211855  | -3.482466 | -0.635927 | C | 2.712918  | -3.476103 | 0.670516  |
| C | 2.373973  | 0.017443  | 3.498849  | C | 4.567055  | -3.034739 | -0.896733 |
| C | 3.551244  | -3.022837 | 1.765330  | C | 3.211781  | -2.318950 | -2.675552 |
| C | 3.211814  | -1.157411 | 3.344543  | C | 4.568079  | -2.316552 | -2.158190 |
| C | 0.549540  | -1.435946 | -2.171429 | C | -2.878879 | -0.702367 | 3.609018  |
| C | -0.287692 | 0.693040  | -1.244945 | C | -2.878879 | 0.738375  | 3.601823  |
| C | -0.288223 | 1.425009  | 0.008127  | C | -3.418163 | 1.430299  | 2.449200  |
| C | 0.549700  | 1.185852  | 2.317418  | C | -3.957420 | 2.774273  | 2.412715  |
| C | 0.549700  | 1.414190  | -2.185536 | C | -3.957451 | 3.488138  | 1.161227  |
| C | 0.549938  | 2.598384  | -0.157581 | C | -3.418224 | 2.835544  | -0.014076 |
| C | 1.356842  | 2.316551  | 2.158045  | C | -2.878996 | 3.476368  | -1.195837 |
| C | 1.357613  | -0.740805 | -3.075838 | C | -2.879027 | 2.750041  | -2.440133 |
| C | 4.567121  | -0.709999 | 3.082541  | C | -3.418284 | 1.405769  | -2.463195 |
| C | 1.067309  | 2.592320  | -1.513827 | C | -3.957568 | 0.702368  | -3.608850 |
| C | 1.357866  | 3.034738  | 0.896588  | C | -3.957568 | -0.738374 | -3.601656 |
| C | 2.713140  | 2.318949  | 2.675407  | C | -3.418284 | -1.430298 | -2.449033 |
| C | 3.551368  | 3.040157  | 1.735104  | C | -2.879027 | -2.774273 | -2.412547 |
| C | 6.212613  | -0.693041 | 1.244800  | C | -2.878996 | -3.488137 | -1.161059 |
| C | 2.713065  | 3.482465  | 0.635782  | C | -3.418224 | -2.835543 | 0.014243  |
| C | 3.212002  | 3.476102  | -0.670661 | C | -3.957451 | -3.476367 | 1.196004  |
| C | 4.567268  | 3.025866  | -0.927059 | C | -3.957420 | -2.750040 | 2.440301  |
| C | 2.373677  | 3.022836  | -1.765476 | C | -3.418163 | -1.405768 | 2.463362  |
| C | 2.713071  | -1.190650 | -3.333003 | C | -3.418193 | -0.709795 | 1.243959  |
| C | 6.212190  | 0.705265  | 1.237679  | C | -3.418193 | 0.722183  | 1.236808  |
| C | 1.357800  | 0.709999  | -3.082686 | C | -3.418224 | 1.431752  | -0.007066 |
| C | 2.713107  | 1.157410  | -3.344689 | C | -3.418254 | 0.709796  | -1.243791 |
| C | 5.375381  | 1.435945  | 2.171284  | C | -3.418254 | -0.722182 | -1.236640 |
| C | 6.213144  | -1.425010 | -0.008273 | C | -3.418224 | -1.431751 | 0.007233  |
| C | 6.212739  | -0.731815 | -1.222607 | C | -4.682232 | -3.280238 | 3.537807  |
| C | 4.857582  | 2.607103  | 1.487683  | C | -5.348886 | -4.491040 | 3.436142  |
| C | 5.375074  | 2.599881  | 0.131473  | C | -5.348916 | -5.200169 | 2.220780  |
| C | 3.211859  | 2.292043  | -2.698276 | C | -4.682292 | -4.692409 | 1.116931  |
| C | 4.568133  | 2.294928  | -2.181154 | C | -2.154015 | 1.424181  | 4.609241  |
| C | 6.212826  | 1.424680  | -0.022449 | C | -1.487340 | 0.731533  | 5.607511  |
| C | 3.550948  | -0.017443 | -3.498995 | C | -1.487340 | -0.675495 | 5.614538  |
| C | 5.375220  | -1.185853 | -2.317563 | C | -2.154015 | -1.378078 | 4.623234  |
| C | 6.212654  | 0.719483  | -1.229819 | C | -4.682292 | 4.703330  | 1.070013  |
| C | 4.857335  | -0.014983 | -3.001083 | C | -5.348916 | 5.222089  | 2.168736  |
| C | 5.375122  | 1.162541  | -2.329129 | C | -5.348886 | 4.525132  | 3.391119  |
| C | 5.375221  | -1.414191 | 2.185391  | C | -4.682232 | 3.315406  | 3.504871  |
| C | 4.857612  | -2.592321 | 1.513681  | C | -2.154215 | 3.280239  | -3.537639 |
| C | 5.374983  | -2.598384 | 0.157436  | C | -1.487561 | 4.491041  | -3.435974 |
| C | 3.211850  | 1.190649  | 3.332857  | C | -1.487531 | 5.200170  | -2.220612 |
| C | 4.567308  | 0.740805  | 3.075693  | C | -2.154155 | 4.692410  | -1.116764 |
| C | 1.357653  | -3.025867 | 0.926914  | C | -4.682432 | -1.424180 | -4.609073 |

|   |           |           |           |   |           |           |           |
|---|-----------|-----------|-----------|---|-----------|-----------|-----------|
| C | -5.349107 | -0.731532 | -5.607344 | C | -0.278577 | -0.737358 | -1.219116 |
| C | -5.349107 | 0.675496  | -5.614370 | C | 2.382901  | 3.048005  | 1.721341  |
| C | -4.682432 | 1.378079  | -4.623066 | C | 3.221165  | 3.485317  | 0.619992  |
| C | -2.154155 | -4.703329 | -1.069846 | C | 2.383133  | -0.033331 | -3.498820 |
| C | -1.487531 | -5.222088 | -2.168568 | C | 3.560467  | 3.014788  | -1.779166 |
| C | -1.487561 | -4.525131 | -3.390952 | C | 3.220980  | 1.142211  | -3.349880 |
| C | -2.154215 | -3.315405 | -3.504703 | C | 0.558904  | 1.445791  | 2.164867  |
| H | -4.789401 | -2.687828 | 4.442681  | C | -0.278362 | -0.687380 | 1.248089  |
| H | -5.921651 | -4.863481 | 4.281575  | C | -0.278938 | -1.425031 | -0.001646 |
| H | -5.921704 | -6.119373 | 2.128839  | C | 0.558903  | -1.196363 | -2.312029 |
| H | -4.789506 | -5.187408 | 0.155312  | C | 0.559064  | -1.404252 | 2.191916  |
| H | -2.046826 | 2.503967  | 4.547182  | C | 0.559229  | -2.597641 | 0.169359  |
| H | -0.914536 | 1.278041  | 6.352312  | C | 1.366049  | -2.326327 | -2.147553 |
| H | -0.914536 | -1.214538 | 6.364759  | C | 1.367009  | 0.754764  | 3.072394  |
| H | -2.046826 | -2.458430 | 4.571962  | C | 4.576296  | 0.695993  | -3.085897 |
| H | -4.789506 | 5.188701  | 0.103498  | C | 1.076648  | -2.585420 | 1.525544  |
| H | -5.921704 | 6.140328  | 2.067619  | C | 1.367119  | -3.038778 | -0.882848 |
| H | -5.921651 | 4.905998  | 4.232791  | C | 2.722329  | -2.331075 | -2.664947 |
| H | -4.789401 | 2.732062  | 4.415617  | C | 3.560591  | -3.048006 | -1.721409 |
| H | -2.047046 | 2.687829  | -4.442514 | C | 6.221854  | 0.687379  | -1.248158 |
| H | -0.914796 | 4.863482  | -4.281408 | C | 2.722328  | -3.485317 | -0.620060 |
| H | -0.914743 | 6.119374  | -2.128671 | C | 3.221312  | -3.473022 | 0.686323  |
| H | -2.046941 | 5.187409  | -0.155144 | C | 4.576587  | -3.021627 | 0.940625  |
| H | -4.789621 | -2.503966 | -4.547015 | C | 2.383025  | -3.014789 | 1.779098  |
| H | -5.921911 | -1.278040 | -6.352144 | C | 2.722476  | 1.205771  | 3.327464  |
| H | -5.921911 | 1.214539  | -6.364591 | C | 6.221431  | -0.710880 | -1.234688 |
| H | -4.789621 | 2.458431  | -4.571795 | C | 1.367196  | -0.695994 | 3.085829  |
| H | -2.046941 | -5.188700 | -0.103330 | C | 2.722512  | -1.142211 | 3.349812  |
| H | -0.914743 | -6.140327 | -2.067452 | C | 5.384588  | -1.445791 | -2.164935 |
| H | -0.914796 | -4.905997 | -4.232623 | C | 6.222430  | 1.425031  | 0.001578  |
| H | -2.047046 | -2.732062 | -4.415449 | C | 6.222069  | 0.737357  | 1.219048  |

132

cf14, c-HBC\_heterodimers\_with\_C60 with bowl depth: 1.36

|   |           |           |           |   |          |           |           |
|---|-----------|-----------|-----------|---|----------|-----------|-----------|
| C | -0.278492 | 0.713893  | -1.232918 | C | 4.866814 | -2.613833 | -1.476004 |
| C | 0.559001  | 1.151954  | -2.334258 | C | 5.384355 | -2.600453 | -0.119860 |
| C | 1.365995  | 2.285001  | -2.191456 | C | 3.221241 | -2.279768 | 2.708540  |
| C | 0.559138  | 2.600452  | 0.119792  | C | 4.577497 | -2.285002 | 2.191388  |
| C | -0.278620 | 1.424565  | -0.028762 | C | 6.222112 | -1.424565 | 0.028694  |
| C | 1.076764  | -0.028609 | -3.000877 | C | 3.560359 | 0.033330  | 3.498752  |
| C | 2.722251  | 2.279767  | -2.708608 | C | 5.384590 | 1.196362  | 2.311961  |
| C | 1.076678  | 2.613833  | 1.475936  | C | 6.221984 | -0.713893 | 1.232850  |
| C | -0.277939 | 0.710879  | 1.234620  | C | 4.866728 | 0.028608  | 3.000809  |
|   |           |           |           | C | 5.384492 | -1.151955 | 2.334190  |
|   |           |           |           | C | 5.384428 | 1.404251  | -2.191984 |
|   |           |           |           | C | 4.866844 | 2.585419  | -1.525612 |
|   |           |           |           | C | 5.384263 | 2.597641  | -0.169427 |
|   |           |           |           | C | 3.221016 | -1.205772 | -3.327532 |

|   |           |           |           |                                   |           |           |           |
|---|-----------|-----------|-----------|-----------------------------------|-----------|-----------|-----------|
| C | 4.576483  | -0.754765 | -3.072462 | C                                 | -2.067593 | -4.636964 | 1.108224  |
| C | 1.366906  | 3.021627  | -0.940693 | C                                 | -4.790219 | 1.445406  | 4.543511  |
| C | 2.722181  | 3.473022  | -0.686391 | C                                 | -5.508041 | 0.755807  | 5.508395  |
| C | 4.576374  | 3.038778  | 0.882780  | C                                 | -5.508041 | -0.650639 | 5.521805  |
| C | 3.221163  | 2.331074  | 2.664879  | C                                 | -4.790219 | -1.358510 | 4.570245  |
| C | 4.577443  | 2.326326  | 2.147485  | C                                 | -2.067593 | 4.657252  | 1.019608  |
| C | -2.849523 | 0.687474  | -3.594630 | C                                 | -1.349747 | 5.148200  | 2.099147  |
| C | -2.849523 | -0.755889 | -3.580868 | C                                 | -1.349733 | 4.456698  | 3.324003  |
| C | -3.428966 | -1.440246 | -2.440629 | C                                 | -2.067565 | 3.278757  | 3.461528  |
| C | -4.008422 | -2.769229 | -2.392530 | H                                 | -4.905757 | 2.608781  | -4.420398 |
| C | -4.008407 | -3.479014 | -1.135603 | H                                 | -6.122732 | 4.731418  | -4.238298 |
| C | -3.428938 | -2.833627 | 0.027057  | H                                 | -6.122707 | 5.997633  | -2.092018 |
| C | -2.849468 | -3.456728 | 1.201811  | H                                 | -4.905708 | 5.129795  | -0.145931 |
| C | -2.849454 | -2.723105 | 2.444975  | H                                 | -1.952220 | -2.523890 | -4.468647 |
| C | -3.428910 | -1.393447 | 2.467726  | H                                 | -0.735263 | -1.305384 | -6.216647 |
| C | -4.008353 | -0.687473 | 3.594709  | H                                 | -0.735263 | 1.186611  | -6.240408 |
| C | -4.008353 | 0.755890  | 3.580947  | H                                 | -1.952220 | 2.438226  | -4.515958 |
| C | -3.428910 | 1.440246  | 2.440708  | H                                 | -4.905708 | -5.131645 | -0.048092 |
| C | -2.849454 | 2.769229  | 2.392608  | H                                 | -6.122707 | -6.036432 | -1.977279 |
| C | -2.849468 | 3.479015  | 1.135682  | H                                 | -6.122732 | -4.811372 | -4.147311 |
| C | -3.428938 | 2.833628  | -0.026978 | H                                 | -4.905757 | -2.692592 | -4.369852 |
| C | -4.008407 | 3.456729  | -1.201733 | H                                 | -1.952119 | -2.608780 | 4.420477  |
| C | -4.008422 | 2.723106  | -2.444897 | H                                 | -0.735144 | -4.731418 | 4.238376  |
| C | -3.428966 | 1.393447  | -2.467647 | H                                 | -0.735169 | -5.997632 | 2.092097  |
| C | -3.428952 | 0.703537  | -1.245873 | H                                 | -1.952168 | -5.129794 | 0.146009  |
| C | -3.428952 | -0.727164 | -1.232232 | H                                 | -4.905655 | 2.523891  | 4.468725  |
| C | -3.428938 | -1.430624 | 0.013680  | H                                 | -6.122613 | 1.305384  | 6.216726  |
| C | -3.428924 | -0.703536 | 1.245951  | H                                 | -6.122613 | -1.186610 | 6.240486  |
| C | -3.428924 | 0.727165  | 1.232310  | H                                 | -4.905655 | -2.438225 | 4.516037  |
| C | -3.428938 | 1.430624  | -0.013601 | H                                 | -1.952168 | 5.131645  | 0.048171  |
| C | -4.790311 | 3.212159  | -3.523337 | H                                 | -0.735169 | 6.036433  | 1.977357  |
| C | -5.508142 | 4.392508  | -3.408298 | H                                 | -0.735144 | 4.811372  | 4.147390  |
| C | -5.508128 | 5.107239  | -2.196850 | H                                 | -1.952119 | 2.692593  | 4.369930  |
| C | -4.790283 | 4.636965  | -1.108146 |                                   |           |           |           |
| C | -2.067657 | -1.445405 | -4.543432 |                                   |           |           |           |
| C | -1.349835 | -0.755806 | -5.508317 |                                   |           |           |           |
| C | -1.349835 | 0.650640  | -5.521727 |                                   |           |           |           |
| C | -2.067657 | 1.358511  | -4.570166 | 132                               |           |           |           |
| C | -4.790283 | -4.657251 | -1.019530 | cf15, c-HBC_heterodimers_with_C60 |           |           |           |
| C | -5.508128 | -5.148199 | -2.099069 |                                   |           |           |           |
| C | -5.508142 | -4.456697 | -3.323924 |                                   |           |           |           |
| C | -4.790311 | -3.278756 | -3.461449 |                                   |           |           |           |
| C | -2.067565 | -3.212158 | 3.523416  | C                                 | -0.259931 | 0.714805  | -1.232387 |
| C | -1.349733 | -4.392508 | 3.408376  | C                                 | 0.577551  | 1.153682  | -2.333410 |
| C | -1.349747 | -5.107238 | 2.196928  | C                                 | 1.384548  | 2.286623  | -2.189776 |
|   |           |           |           | C                                 | 0.577710  | 2.600363  | 0.121712  |
|   |           |           |           | C                                 | -0.260049 | 1.424585  | -0.027705 |
|   |           |           |           | C                                 | 1.095309  | -0.026387 | -3.000907 |
|   |           |           |           | C                                 | 2.740799  | 2.281772  | -2.706944 |

|   |           |           |           |   |           |           |           |
|---|-----------|-----------|-----------|---|-----------|-----------|-----------|
| C | 1.095263  | 2.612739  | 1.477861  | C | 5.402834  | 2.597765  | -0.167551 |
| C | -0.259356 | 0.709965  | 1.235148  | C | 3.239558  | -1.203308 | -3.328453 |
| C | -0.260016 | -0.736455 | -1.219660 | C | 4.595027  | -0.752490 | -3.073061 |
| C | 2.401488  | 3.046730  | 1.723576  | C | 1.385469  | 3.022322  | -0.938468 |
| C | 3.239742  | 3.484856  | 0.622543  | C | 2.740746  | 3.473529  | -0.683843 |
| C | 2.401674  | -0.030740 | -3.498865 | C | 4.594953  | 3.038123  | 0.884988  |
| C | 3.579023  | 3.016104  | -1.776965 | C | 3.239758  | 2.329100  | 2.666576  |
| C | 3.239522  | 1.144690  | -3.349062 | C | 4.596034  | 2.324735  | 2.149166  |
| C | 0.577495  | 1.444188  | 2.165931  | C | -2.829837 | 0.691818  | -3.575247 |
| C | -0.259779 | -0.688304 | 1.247582  | C | -2.829837 | -0.754588 | -3.562527 |
| C | -0.260367 | -1.425030 | -0.002699 | C | -3.450416 | -1.437463 | -2.439972 |
| C | 0.577453  | -1.194650 | -2.312920 | C | -4.071017 | -2.750292 | -2.386543 |
| C | 0.577655  | -1.405874 | 2.190870  | C | -4.070992 | -3.462574 | -1.127509 |
| C | 0.577802  | -2.597766 | 0.167430  | C | -3.450366 | -2.831761 | 0.024973  |
| C | 1.384602  | -2.324736 | -2.149287 | C | -2.829741 | -3.442208 | 1.188370  |
| C | 1.385608  | 0.752489  | 3.072939  | C | -2.829716 | -2.707894 | 2.434683  |
| C | 4.594840  | 0.698278  | -3.085422 | C | -3.450317 | -1.394328 | 2.465015  |
| C | 1.095233  | -2.586549 | 1.523619  | C | -4.070896 | -0.691817 | 3.575387  |
| C | 1.385682  | -3.038124 | -0.885110 | C | -4.070896 | 0.754589  | 3.562667  |
| C | 2.740877  | -2.329101 | -2.666697 | C | -3.450317 | 1.437464  | 2.440112  |
| C | 3.579147  | -3.046731 | -1.723697 | C | -2.829716 | 2.750293  | 2.386683  |
| C | 6.240414  | 0.688303  | -1.247704 | C | -2.829741 | 3.462575  | 1.127649  |
| C | 2.740893  | -3.484857 | -0.622665 | C | -3.450366 | 2.831762  | -0.024833 |
| C | 3.239889  | -3.473530 | 0.683722  | C | -4.070992 | 3.442209  | -1.188230 |
| C | 4.595166  | -3.022323 | 0.938347  | C | -4.071017 | 2.707895  | -2.434543 |
| C | 2.401612  | -3.016105 | 1.776844  | C | -3.450416 | 1.394329  | -2.464875 |
| C | 2.741077  | 1.203307  | 3.328331  | C | -3.450392 | 0.703861  | -1.244246 |
| C | 6.239991  | -0.709966 | -1.235269 | C | -3.450392 | -0.725634 | -1.231675 |
| C | 1.385795  | -0.698279 | 3.085301  | C | -3.450366 | -1.429454 | 0.012641  |
| C | 2.741113  | -1.144691 | 3.348941  | C | -3.450341 | -0.703859 | 1.244386  |
| C | 5.403140  | -1.444189 | -2.166053 | C | -3.450341 | 0.725635  | 1.231815  |
| C | 6.241002  | 1.425029  | 0.002578  | C | -3.450366 | 1.429455  | -0.012501 |
| C | 6.240651  | 0.736454  | 1.219538  | C | -4.909008 | 3.158964  | -3.488573 |
| C | 4.885372  | -2.612740 | -1.477982 | C | -5.676554 | 4.305617  | -3.352070 |
| C | 5.402925  | -2.600364 | -0.121833 | C | -5.676529 | 5.019089  | -2.140832 |
| C | 3.239836  | -2.281773 | 2.706822  | C | -4.908958 | 4.582622  | -1.071774 |
| C | 4.596088  | -2.286624 | 2.189654  | C | -1.991887 | -1.442066 | -4.479961 |
| C | 6.240684  | -1.424586 | 0.027584  | C | -1.224356 | -0.750411 | -5.404703 |
| C | 3.578962  | 0.030739  | 3.498743  | C | -1.224356 | 0.655243  | -5.417065 |
| C | 5.403182  | 1.194649  | 2.312798  | C | -1.991887 | 1.363055  | -4.504629 |
| C | 6.240566  | -0.714806 | 1.232266  | C | -4.908958 | -4.600763 | -0.991015 |
| C | 4.885326  | 0.026386  | 3.000786  | C | -5.676529 | -5.055963 | -2.052231 |
| C | 5.403084  | -1.153683 | 2.333289  | C | -5.676554 | -4.363904 | -3.275829 |
| C | 5.402980  | 1.405873  | -2.190991 | C | -4.909008 | -3.219829 | -3.432478 |
| C | 4.885402  | 2.586548  | -1.523741 | C | -1.991725 | -3.158963 | 3.488713  |

|   |           |           |           |   |           |           |           |
|---|-----------|-----------|-----------|---|-----------|-----------|-----------|
| C | -1.224179 | -4.305616 | 3.352210  | C | 1.123162  | -0.022237 | -3.000943 |
| C | -1.224204 | -5.019088 | 2.140972  | C | 2.768652  | 2.285514  | -2.703790 |
| C | -1.991774 | -4.582621 | 1.071914  | C | 1.123122  | 2.610693  | 1.481471  |
| C | -4.908846 | 1.442068  | 4.480101  | C | -0.231497 | 0.708256  | 1.236128  |
| C | -5.676377 | 0.750412  | 5.404843  | C | -0.232161 | -0.734767 | -1.220677 |
| C | -5.676377 | -0.655242 | 5.417205  | C | 2.429348  | 3.044343  | 1.727784  |
| C | -4.908846 | -1.363054 | 4.504769  | C | 3.267600  | 3.483992  | 0.627357  |
| C | -1.991775 | 4.600764  | 0.991155  | C | 2.429526  | -0.025901 | -3.498908 |
| C | -1.224204 | 5.055965  | 2.052371  | C | 3.606878  | 3.018559  | -1.772798 |
| C | -1.224179 | 4.363905  | 3.275969  | C | 3.267374  | 1.149321  | -3.347481 |
| C | -1.991725 | 3.219830  | 3.432618  | C | 0.605355  | 1.441191  | 2.167925  |
| H | -5.032708 | 2.549080  | -4.380489 | C | -0.231920 | -0.690028 | 1.246629  |
| H | -6.331192 | 4.613383  | -4.163353 | C | -0.232510 | -1.425025 | -0.004671 |
| H | -6.331148 | 5.877899  | -2.016634 | C | 0.605307  | -1.191450 | -2.314571 |
| H | -5.032621 | 5.066778  | -0.105797 | C | 0.605515  | -1.408903 | 2.188922  |
| H | -1.868203 | -2.519424 | -4.397401 | C | 0.605659  | -2.597995 | 0.163836  |
| H | -0.569748 | -1.299116 | -6.076914 | C | 1.412456  | -2.321761 | -2.152503 |
| H | -0.569748 | 1.192041  | -6.098822 | C | 1.413470  | 0.748238  | 3.073975  |
| H | -1.868203 | 2.441698  | -4.441030 | C | 4.622693  | 0.702544  | -3.084460 |
| H | -5.032621 | -5.067855 | -0.016672 | C | 1.123092  | -2.588653 | 1.520038  |
| H | -6.331148 | -5.912457 | -1.912949 | C | 1.413538  | -3.036897 | -0.889313 |
| H | -6.331192 | -4.685890 | -4.081574 | C | 2.768730  | -2.325411 | -2.669920 |
| H | -5.032708 | -2.625724 | -4.334982 | C | 3.607002  | -3.044344 | -1.727915 |
| H | -1.868025 | -2.549078 | 4.380629  | C | 6.268270  | 0.690028  | -1.246760 |
| H | -0.569541 | -4.613382 | 4.163493  | C | 2.768750  | -3.483993 | -0.627488 |
| H | -0.569585 | -5.877898 | 2.016774  | C | 3.267747  | -3.474472 | 0.678912  |
| H | -1.868112 | -5.066776 | 0.105937  | C | 4.623025  | -3.023618 | 0.934159  |
| H | -5.032530 | 2.519425  | 4.397541  | C | 2.429472  | -3.018560 | 1.772667  |
| H | -6.330985 | 1.299117  | 6.077054  | C | 2.768939  | 1.198703  | 3.329988  |
| H | -6.330985 | -1.192040 | 6.098962  | C | 6.267847  | -0.708257 | -1.236259 |
| H | -5.032530 | -2.441697 | 4.441170  | C | 1.413657  | -0.702545 | 3.084329  |
| H | -1.868112 | 5.067856  | 0.016812  | C | 2.768975  | -1.149322 | 3.347350  |
| H | -0.569585 | 5.912458  | 1.913089  | C | 5.430994  | -1.441192 | -2.168056 |
| H | -0.569541 | 4.685891  | 4.081714  | C | 6.268859  | 1.425024  | 0.004539  |
| H | -1.868025 | 2.625726  | 4.335122  | C | 6.268510  | 0.734766  | 1.220546  |
|   |           |           |           | C | 4.913227  | -2.610693 | -1.481602 |
|   |           |           |           | C | 5.430782  | -2.600193 | -0.125438 |
|   |           |           |           | C | 3.267697  | -2.285515 | -2.703659 |
|   |           |           |           | C | 4.623948  | -2.289650 | 2.186483  |
|   |           |           |           | C | 6.268541  | -1.424623 | 0.025604  |
|   |           |           |           | C | 3.606824  | 0.025900  | 3.498777  |
|   |           |           |           | C | 5.431042  | 1.191450  | 2.314440  |
|   |           |           |           | C | 6.268425  | -0.716510 | 1.231267  |
|   |           |           |           | C | 4.913188  | 0.022236  | 3.000812  |
|   |           |           |           | C | 5.430944  | -1.156909 | 2.331683  |

132  
 cf16, c-HBC\_heterodimers\_with\_C60 with bowl depth: 1.56

|   |           |          |           |   |           |           |           |
|---|-----------|----------|-----------|---|-----------|-----------|-----------|
| C | -0.232076 | 0.716509 | -1.231398 | C | 1.123162  | -0.022237 | -3.000943 |
| C | 0.605405  | 1.156908 | -2.331814 | C | 2.768652  | 2.285514  | -2.703790 |
| C | 1.412402  | 2.289649 | -2.186614 | C | 1.123122  | 2.610693  | 1.481471  |
| C | 0.605568  | 2.600192 | 0.125307  | C | -0.231497 | 0.708256  | 1.236128  |
| C | -0.232192 | 1.424622 | -0.025735 | C | -0.232161 | -0.734767 | -1.220677 |

|   |           |           |           |
|---|-----------|-----------|-----------|
| C | 5.430834  | 1.408902  | -2.189053 |
| C | 4.913257  | 2.588652  | -1.520169 |
| C | 5.430691  | 2.597994  | -0.163967 |
| C | 3.267410  | -1.198704 | -3.330119 |
| C | 4.622880  | -0.748239 | -3.074106 |
| C | 1.413325  | 3.023617  | -0.934290 |
| C | 2.768603  | 3.474471  | -0.679043 |
| C | 4.622811  | 3.036896  | 0.889182  |
| C | 3.267619  | 2.325410  | 2.669789  |
| C | 4.623894  | 2.321761  | 2.152372  |
| C | -2.819389 | 0.698565  | -3.553586 |
| C | -2.819389 | -0.751157 | -3.542842 |
| C | -3.482563 | -1.433197 | -2.440391 |
| C | -4.145758 | -2.728195 | -2.381577 |
| C | -4.145731 | -3.443871 | -1.120657 |
| C | -3.482509 | -2.829919 | 0.021048  |
| C | -2.819287 | -3.426882 | 1.171727  |
| C | -2.819260 | -2.692597 | 2.421902  |
| C | -3.482456 | -1.396869 | 2.461516  |
| C | -4.145629 | -0.698564 | 3.553738  |
| C | -4.145629 | 0.751158  | 3.542994  |
| C | -3.482456 | 1.433198  | 2.440543  |
| C | -2.819260 | 2.728196  | 2.381729  |
| C | -2.819287 | 3.443872  | 1.120808  |
| C | -3.482509 | 2.829920  | -0.020897 |
| C | -4.145731 | 3.426883  | -1.171576 |
| C | -4.145758 | 2.692598  | -2.421751 |
| C | -3.482563 | 1.396870  | -2.461365 |
| C | -3.482536 | 0.704959  | -1.242214 |
| C | -3.482536 | -0.723292 | -1.231629 |
| C | -3.482509 | -1.428245 | 0.010660  |
| C | -3.482482 | -0.704957 | 1.242365  |
| C | -3.482482 | 0.723293  | 1.231780  |
| C | -3.482509 | 1.428246  | -0.010509 |
| C | -5.038393 | 3.103522  | -3.448997 |
| C | -5.854112 | 4.213456  | -3.288675 |
| C | -5.854086 | 4.924760  | -2.077269 |
| C | -5.038340 | 4.524057  | -1.029903 |
| C | -1.926796 | -1.435653 | -4.412018 |
| C | -1.111092 | -0.741637 | -5.292970 |
| C | -1.111092 | 0.663108  | -5.303381 |
| C | -1.926796 | 1.370104  | -4.432811 |
| C | -5.038340 | -4.538824 | -0.962738 |
| C | -5.854086 | -4.955007 | -2.004050 |
| C | -5.854112 | -4.261735 | -3.225866 |

|   |           |           |           |
|---|-----------|-----------|-----------|
| C | -5.038393 | -3.154300 | -3.402620 |
| C | -1.926626 | -3.103521 | 3.449148  |
| C | -1.110907 | -4.213455 | 3.288826  |
| C | -1.110933 | -4.924759 | 2.077420  |
| C | -1.926679 | -4.524056 | 1.030054  |
| C | -5.038222 | 1.435654  | 4.412169  |
| C | -5.853926 | 0.741638  | 5.293121  |
| C | -5.853926 | -0.663107 | 5.303532  |
| C | -5.038222 | -1.370103 | 4.432963  |
| C | -1.926679 | 4.538825  | 0.962889  |
| C | -1.110933 | 4.955008  | 2.004202  |
| C | -1.110907 | 4.261736  | 3.226017  |
| C | -1.926626 | 3.154301  | 3.402771  |
| H | -5.170339 | 2.487701  | -4.336011 |
| H | -6.547076 | 4.488096  | -4.079754 |
| H | -6.547029 | 5.749428  | -1.931580 |
| H | -5.170246 | 4.998379  | -0.059818 |
| H | -1.794868 | -2.511732 | -4.322058 |
| H | -0.418159 | -1.289285 | -5.926516 |
| H | -0.418159 | 1.201306  | -5.944974 |
| H | -1.794868 | 2.447398  | -4.358810 |
| H | -5.170246 | -4.998717 | 0.014270  |
| H | -6.547029 | -5.777425 | -1.846154 |
| H | -6.547076 | -4.548070 | -4.012787 |
| H | -5.170339 | -2.551693 | -4.298664 |
| H | -1.794680 | -2.487700 | 4.336162  |
| H | -0.417942 | -4.488095 | 4.079905  |
| H | -0.417989 | -5.749427 | 1.931731  |
| H | -1.794773 | -4.998378 | 0.059969  |
| H | -5.170151 | 2.511733  | 4.322209  |
| H | -6.546859 | 1.289287  | 5.926667  |
| H | -6.546859 | -1.201305 | 5.945125  |
| H | -5.170151 | -2.447397 | 4.358961  |
| H | -1.794773 | 4.998718  | -0.014119 |
| H | -0.417989 | 5.777426  | 1.846306  |
| H | -0.417942 | 4.548071  | 4.012939  |
| H | -1.794680 | 2.551694  | 4.298815  |

132

cf17, c-HBC\_heterodimers\_with\_C60 with bowl depth: 1.65

|   |           |          |           |
|---|-----------|----------|-----------|
| C | -0.153141 | 0.716568 | -1.231366 |
| C | 0.684346  | 1.157020 | -2.331757 |
| C | 1.491341  | 2.289754 | -2.186498 |

|   |           |           |           |   |           |           |           |
|---|-----------|-----------|-----------|---|-----------|-----------|-----------|
| C | 0.684496  | 2.600186  | 0.125433  | C | 4.992101  | 0.022092  | 3.000837  |
| C | -0.153263 | 1.424624  | -0.025670 | C | 5.509861  | -1.157021 | 2.331654  |
| C | 1.202106  | -0.022093 | -3.000940 | C | 5.509774  | 1.409007  | -2.188959 |
| C | 2.847595  | 2.285643  | -2.703667 | C | 4.992193  | 2.588725  | -1.520021 |
| C | 1.202043  | 2.610622  | 1.481601  | C | 5.509620  | 2.598002  | -0.163815 |
| C | -0.152575 | 0.708197  | 1.236160  | C | 3.346356  | -1.198544 | -3.330161 |
| C | -0.153226 | -0.734709 | -1.220715 | C | 4.701824  | -0.748092 | -3.074119 |
| C | 2.508267  | 3.044260  | 1.727941  | C | 1.492258  | 3.023662  | -0.934139 |
| C | 3.346525  | 3.483962  | 0.627540  | C | 2.847534  | 3.474504  | -0.678864 |
| C | 2.508472  | -0.025734 | -3.498898 | C | 4.701735  | 3.036854  | 0.889350  |
| C | 3.685815  | 3.018644  | -1.772636 | C | 3.346534  | 2.325282  | 2.669916  |
| C | 3.346320  | 1.149482  | -3.347411 | C | 4.702811  | 2.321658  | 2.152506  |
| C | 0.684272  | 1.441087  | 2.167996  | C | -2.866355 | 0.700741  | -3.531258 |
| C | -0.152998 | -0.690088 | 1.246593  | C | -2.866355 | -0.752664 | -3.520556 |
| C | -0.153581 | -1.425025 | -0.004741 | C | -3.573621 | -1.432287 | -2.439084 |
| C | 0.684248  | -1.191340 | -2.314626 | C | -4.280904 | -2.707782 | -2.372369 |
| C | 0.684432  | -1.409008 | 2.188856  | C | -4.280883 | -3.425316 | -1.108269 |
| C | 0.684587  | -2.598003 | 0.163713  | C | -3.573581 | -2.828276 | 0.020884  |
| C | 1.491395  | -2.321658 | -2.152608 | C | -2.866278 | -3.408624 | 1.158706  |
| C | 1.492382  | 0.748091  | 3.074017  | C | -2.866257 | -2.672553 | 2.412103  |
| C | 4.701637  | 0.702692  | -3.084404 | C | -3.573540 | -1.396214 | 2.460029  |
| C | 1.202013  | -2.588726 | 1.519919  | C | -4.280806 | -0.700740 | 3.531376  |
| C | 1.492471  | -3.036854 | -0.889453 | C | -4.280806 | 0.752665  | 3.520674  |
| C | 2.847673  | -2.325283 | -2.670019 | C | -3.573540 | 1.432287  | 2.439202  |
| C | 3.685939  | -3.044261 | -1.728043 | C | -2.866257 | 2.707783  | 2.372488  |
| C | 6.347205  | 0.690087  | -1.246696 | C | -2.866278 | 3.425317  | 1.108387  |
| C | 2.847682  | -3.483963 | -0.627642 | C | -3.573581 | 2.828277  | -0.020766 |
| C | 3.346672  | -3.474505 | 0.678762  | C | -4.280883 | 3.408625  | -1.158588 |
| C | 4.701948  | -3.023663 | 0.934037  | C | -4.280904 | 2.672554  | -2.411985 |
| C | 2.508391  | -3.018645 | 1.772534  | C | -3.573621 | 1.396215  | -2.459911 |
| C | 2.847850  | 1.198543  | 3.330058  | C | -3.573601 | 0.704510  | -1.241288 |
| C | 6.346782  | -0.708198 | -1.236262 | C | -3.573601 | -0.722712 | -1.230779 |
| C | 1.492569  | -0.702693 | 3.084302  | C | -3.573581 | -1.427201 | 0.010568  |
| C | 2.847886  | -1.149482 | 3.347308  | C | -3.573560 | -0.704509 | 1.241406  |
| C | 5.509934  | -1.441088 | -2.168098 | C | -3.573560 | 0.722713  | 1.230897  |
| C | 6.347788  | 1.425024  | 0.004639  | C | -3.573581 | 1.427202  | -0.010450 |
| C | 6.347433  | 0.734708  | 1.220613  | C | -5.226684 | 3.038852  | -3.410748 |
| C | 4.992163  | -2.610622 | -1.481703 | C | -6.088708 | 4.109575  | -3.226660 |
| C | 5.509711  | -2.600187 | -0.125536 | C | -6.088687 | 4.820230  | -2.016193 |
| C | 3.346612  | -2.285644 | 2.703565  | C | -5.226644 | 4.459217  | -0.991586 |
| C | 4.702865  | -2.289755 | 2.186396  | C | -1.920606 | -1.434800 | -4.336826 |
| C | 6.347470  | -1.424624 | 0.025567  | C | -1.058592 | -0.739923 | -5.172073 |
| C | 3.685734  | 0.025733  | 3.498795  | C | -1.058592 | 0.663681  | -5.182408 |
| C | 5.509959  | 1.191339  | 2.314524  | C | -1.920606 | 1.370782  | -4.357483 |
| C | 6.347348  | -0.716569 | 1.231264  | C | -5.226644 | -4.473335 | -0.925815 |

|   |           |           |           |   |           |           |           |
|---|-----------|-----------|-----------|---|-----------|-----------|-----------|
| C | -6.088687 | -4.849396 | -1.944995 | C | 0.767910  | 1.149117  | -2.335665 |
| C | -6.088708 | -4.156643 | -3.165795 | C | 1.574906  | 2.282337  | -2.194245 |
| C | -5.226684 | -3.088748 | -3.365630 | C | 0.768068  | 2.600596  | 0.116624  |
| C | -1.920478 | -3.038852 | 3.410866  | C | -0.069692 | 1.424529  | -0.030495 |
| C | -1.058454 | -4.109574 | 3.226778  | C | 1.285668  | -0.032255 | -3.000853 |
| C | -1.058474 | -4.820229 | 2.016311  | C | 2.931158  | 2.276475  | -2.711402 |
| C | -1.920518 | -4.459216 | 0.991704  | C | 1.285619  | 2.615624  | 1.472747  |
| C | -5.226556 | 1.434800  | 4.336944  | C | -0.069000 | 0.712379  | 1.233753  |
| C | -6.088569 | 0.739923  | 5.172191  | C | -0.069658 | -0.738838 | -1.218221 |
| C | -6.088569 | -0.663681 | 5.182526  | C | 2.591844  | 3.050094  | 1.717613  |
| C | -5.226556 | -1.370782 | 4.357601  | C | 3.430098  | 3.486067  | 0.615727  |
| C | -1.920518 | 4.473336  | 0.925933  | C | 2.592033  | -0.037582 | -3.498800 |
| C | -1.058474 | 4.849397  | 1.945113  | C | 3.769382  | 3.012624  | -1.782860 |
| C | -1.058454 | 4.156644  | 3.165913  | C | 3.429882  | 1.138140  | -3.351295 |
| C | -1.920478 | 3.088748  | 3.365748  | C | 0.767850  | 1.448420  | 2.163100  |
| H | -5.366871 | 2.415923  | -4.291869 | C | -0.069423 | -0.685863 | 1.248922  |
| H | -6.818015 | 4.347326  | -3.996701 | C | -0.070010 | -1.425032 | 0.000083  |
| H | -6.817980 | 5.608488  | -1.848410 | C | 0.767812  | -1.199171 | -2.310583 |
| H | -5.366800 | 4.924681  | -0.018060 | C | 0.768010  | -1.401588 | 2.193611  |
| H | -1.780431 | -2.509340 | -4.237836 | C | 0.768159  | -2.597434 | 0.172506  |
| H | -0.329307 | -1.287880 | -5.763076 | C | 1.574960  | -2.328934 | -2.144740 |
| H | -0.329307 | 1.202877  | -5.781416 | C | 1.575963  | 0.758496  | 3.071460  |
| H | -1.780431 | 2.446664  | -4.274328 | C | 4.785200  | 0.692243  | -3.086782 |
| H | -5.366800 | -4.924414 | 0.054460  | C | 1.285589  | -2.583565 | 1.528671  |
| H | -6.817980 | -5.635099 | -1.765623 | C | 1.576040  | -3.039849 | -0.879170 |
| H | -6.818015 | -4.405707 | -3.932251 | C | 2.931236  | -2.334311 | -2.662140 |
| H | -5.366871 | -2.478860 | -4.255828 | C | 3.769506  | -3.050095 | -1.717737 |
| H | -1.780290 | -2.415922 | 4.291987  | C | 6.430772  | 0.685862  | -1.249046 |
| H | -0.329146 | -4.347325 | 3.996819  | C | 2.931251  | -3.486068 | -0.615851 |
| H | -0.329182 | -5.608487 | 1.848528  | C | 3.430245  | -3.472186 | 0.690511  |
| H | -1.780361 | -4.924681 | 0.018178  | C | 4.785523  | -3.020483 | 0.944254  |
| H | -5.366730 | 2.509341  | 4.237955  | C | 2.591968  | -3.012625 | 1.782736  |
| H | -6.817854 | 1.287881  | 5.763194  | C | 2.931432  | 1.209813  | 3.325971  |
| H | -6.817854 | -1.202876 | 5.781534  | C | 6.430349  | -0.712380 | -1.233877 |
| H | -5.366730 | -2.446663 | 4.274446  | C | 1.576150  | -0.692245 | 3.086657  |
| H | -1.780361 | 4.924414  | -0.054342 | C | 2.931468  | -1.138141 | 3.351171  |
| H | -0.329182 | 5.635100  | 1.765741  | C | 5.593499  | -1.448421 | -2.163224 |
| H | -0.329146 | 4.405708  | 3.932369  | C | 6.431359  | 1.425031  | -0.000207 |
| H | -1.780290 | 2.478861  | 4.255946  | C | 6.431008  | 0.738837  | 1.218097  |
|   |           |           |           | C | 5.075730  | -2.615625 | -1.472871 |
|   |           |           |           | C | 5.593282  | -2.600597 | -0.116748 |
|   |           |           |           | C | 3.430191  | -2.276476 | 2.711277  |
|   |           |           |           | C | 4.786443  | -2.282338 | 2.194121  |
|   |           |           |           | C | 6.431041  | -1.424530 | 0.030370  |
|   |           |           |           | C | 3.769316  | 0.037580  | 3.498676  |

132  
cf18, c-HBC\_heterodimers\_with\_C60 with bowl depth: 1.75

|   |           |          |           |  |  |  |  |
|---|-----------|----------|-----------|--|--|--|--|
| C | -0.069573 | 0.712394 | -1.233786 |  |  |  |  |
|---|-----------|----------|-----------|--|--|--|--|



|   |           |           |           |   |           |           |           |
|---|-----------|-----------|-----------|---|-----------|-----------|-----------|
| C | 5.593537  | 1.199169  | 2.310458  | C | -1.919808 | 1.356672  | -4.279525 |
| C | 6.430923  | -0.712396 | 1.233662  | C | -5.420312 | -4.404480 | -0.870334 |
| C | 5.075681  | 0.032254  | 3.000729  | C | -6.328084 | -4.739283 | -1.863837 |
| C | 5.593439  | -1.149119 | 2.335541  | C | -6.328107 | -4.051120 | -3.085836 |
| C | 5.593339  | 1.401587  | -2.193735 | C | -5.420360 | -3.027897 | -3.314601 |
| C | 5.075760  | 2.583563  | -1.528795 | C | -1.919659 | -2.955943 | 3.379068  |
| C | 5.593191  | 2.597432  | -0.172630 | C | -1.011911 | -3.983847 | 3.172352  |
| C | 3.429918  | -1.209814 | -3.326095 | C | -1.011935 | -4.698120 | 1.965428  |
| C | 4.785387  | -0.758497 | -3.071584 | C | -1.919706 | -4.384751 | 0.964958  |
| C | 1.575827  | 3.020481  | -0.944378 | C | -5.420211 | 1.448356  | 4.249515  |
| C | 2.931104  | 3.472185  | -0.690636 | C | -6.327948 | 0.755387  | 5.036480  |
| C | 4.785309  | 3.039847  | 0.879046  | C | -6.327948 | -0.646944 | 5.051554  |
| C | 3.430113  | 2.334310  | 2.662015  | C | -5.420211 | -1.356670 | 4.279668  |
| C | 4.786389  | 2.328933  | 2.144616  | C | -1.919706 | 4.404481  | 0.870477  |
| C | -2.917313 | 0.690969  | -3.508655 | C | -1.011935 | 4.739285  | 1.863980  |
| C | -2.917313 | -0.766234 | -3.492991 | C | -1.011911 | 4.051121  | 3.085980  |
| C | -3.670057 | -1.439581 | -2.432555 | C | -1.919659 | 3.027899  | 3.314744  |
| C | -4.422821 | -2.693125 | -2.352670 | H | -5.568796 | 2.322413  | -4.251459 |
| C | -4.422796 | -3.408353 | -1.082868 | H | -7.092482 | 4.178837  | -3.919968 |
| C | -3.670009 | -2.826377 | 0.030454  | H | -7.092440 | 5.447399  | -1.776246 |
| C | -2.917222 | -3.384285 | 1.156029  | H | -5.568712 | 4.844386  | 0.010575  |
| C | -2.917198 | -2.641927 | 2.410163  | H | -1.771387 | -2.520783 | -4.137055 |
| C | -3.669962 | -1.386955 | 2.463082  | H | -0.247721 | -1.305528 | -5.579055 |
| C | -4.422706 | -0.690968 | 3.508798  | H | -0.247721 | 1.185295  | -5.605831 |
| C | -4.422706 | 0.766236  | 3.493134  | H | -1.771387 | 2.431267  | -4.190287 |
| C | -3.669962 | 1.439582  | 2.432698  | H | -5.568712 | -4.843039 | 0.114711  |
| C | -2.917198 | 2.693127  | 2.352814  | H | -7.092440 | -5.484324 | -1.658735 |
| C | -2.917222 | 3.408354  | 1.083011  | H | -7.092482 | -4.262138 | -3.829231 |
| C | -3.670009 | 2.826378  | -0.030311 | H | -5.568796 | -2.413269 | -4.200553 |
| C | -4.422796 | 3.384287  | -1.155886 | H | -1.771223 | -2.322412 | 4.251603  |
| C | -4.422821 | 2.641928  | -2.410020 | H | -0.247537 | -4.178835 | 3.920111  |
| C | -3.670057 | 1.386956  | -2.462939 | H | -0.247579 | -5.447397 | 1.776389  |
| C | -3.670033 | 0.699689  | -1.242546 | H | -1.771306 | -4.844384 | -0.010432 |
| C | -3.670033 | -0.726238 | -1.227218 | H | -5.568632 | 2.520784  | 4.137198  |
| C | -3.670009 | -1.426005 | 0.015401  | H | -7.092297 | 1.305529  | 5.579199  |
| C | -3.669985 | -0.699688 | 1.242689  | H | -7.092297 | -1.185293 | 5.605974  |
| C | -3.669985 | 0.726240  | 1.227361  | H | -5.568632 | -2.431266 | 4.190430  |
| C | -3.670009 | 1.426006  | -0.015257 | H | -1.771307 | 4.843040  | -0.114568 |
| C | -5.420360 | 2.955945  | -3.378925 | H | -0.247579 | 5.484325  | 1.658878  |
| C | -6.328107 | 3.983848  | -3.172209 | H | -0.247537 | 4.262139  | 3.829374  |
| C | -6.328084 | 4.698122  | -1.965285 | H | -1.771223 | 2.413271  | 4.200696  |
| C | -5.420312 | 4.384753  | -0.964815 |   |           |           |           |
| C | -1.919808 | -1.448354 | -4.249372 |   |           |           |           |
| C | -1.012071 | -0.755385 | -5.036337 |   |           |           |           |
| C | -1.012071 | 0.646946  | -5.051411 |   |           |           |           |

132

cf19, c-HBC\_heterodimers\_with\_C60 with bowl depth: 1.85

|   |           |           |           |   |           |           |           |
|---|-----------|-----------|-----------|---|-----------|-----------|-----------|
| C | -0.004589 | 0.704967  | -1.238047 | C | 6.496041  | -1.424323 | 0.038845  |
| C | 0.832880  | 1.135060  | -2.342541 | C | 3.834362  | 0.058605  | 3.498335  |
| C | 1.639878  | 2.269109  | -2.207945 | C | 5.658567  | 1.213032  | 2.303135  |
| C | 0.833069  | 2.601250  | 0.100981  | C | 6.495939  | -0.704970 | 1.237835  |
| C | -0.004692 | 1.424320  | -0.039056 | C | 5.140721  | 0.050285  | 3.000412  |
| C | 1.350629  | -0.050289 | -3.000624 | C | 5.658469  | -1.135063 | 2.342329  |
| C | 2.996123  | 2.260138  | -2.725074 | C | 5.658311  | 1.388376  | -2.202194 |
| C | 1.350639  | 2.624427  | 1.456982  | C | 5.140741  | 2.574328  | -1.544362 |
| C | -0.003984 | 0.719780  | 1.229449  | C | 5.658189  | 2.596347  | -0.188312 |
| C | -0.004674 | -0.746146 | -1.213760 | C | 3.494874  | -1.229782 | -3.318811 |
| C | 2.656867  | 3.060361  | 1.699216  | C | 4.850346  | -0.776944 | -3.067035 |
| C | 3.495107  | 3.489703  | 0.594719  | C | 1.640815  | 3.014751  | -0.962536 |
| C | 2.656988  | -0.058608 | -3.498547 | C | 2.996095  | 3.467971  | -0.711530 |
| C | 3.834359  | 3.001854  | -1.800984 | C | 4.850321  | 3.045074  | 0.860697  |
| C | 3.494838  | 1.117978  | -3.358122 | C | 3.495148  | 2.350265  | 2.647892  |
| C | 0.832879  | 1.461393  | 2.154344  | C | 4.851417  | 2.341778  | 2.130516  |
| C | -0.004407 | -0.678345 | 1.253020  | C | -2.944647 | 0.672508  | -3.485730 |
| C | -0.005010 | -1.425006 | 0.008646  | C | -2.944647 | -0.788943 | -3.461235 |
| C | 0.832782  | -1.213035 | -2.303346 | C | -3.745089 | -1.453395 | -2.422450 |
| C | 0.833039  | -1.388380 | 2.201983  | C | -4.545562 | -2.682598 | -2.325239 |
| C | 0.833160  | -2.596350 | 0.188100  | C | -4.545520 | -3.392427 | -1.047446 |
| C | 1.639932  | -2.341782 | -2.130728 | C | -3.745009 | -2.824816 | 0.047467  |
| C | 1.641003  | 0.776940  | 3.066823  | C | -2.944498 | -3.355416 | 1.160788  |
| C | 4.850159  | 0.673679  | -3.090951 | C | -2.944457 | -2.603165 | 2.414075  |
| C | 1.350609  | -2.574331 | 1.544151  | C | -3.744930 | -1.371394 | 2.470039  |
| C | 1.641028  | -3.045078 | -0.860908 | C | -4.545371 | -0.672504 | 3.485974  |
| C | 2.996201  | -2.350268 | -2.648103 | C | -4.545371 | 0.788947  | 3.461479  |
| C | 3.834483  | -3.060364 | -1.699428 | C | -3.744930 | 1.453399  | 2.422694  |
| C | 6.495756  | 0.678341  | -1.253231 | C | -2.944457 | 2.682603  | 2.325483  |
| C | 2.996242  | -3.489707 | -0.594930 | C | -2.944498 | 3.392431  | 1.047690  |
| C | 3.495254  | -3.467975 | 0.711319  | C | -3.745009 | 2.824820  | -0.047223 |
| C | 4.850534  | -3.014755 | 0.962325  | C | -4.545520 | 3.355420  | -1.160544 |
| C | 2.656991  | -3.001858 | 1.800773  | C | -4.545562 | 2.603169  | -2.413831 |
| C | 2.996476  | 1.229778  | 3.318600  | C | -3.745089 | 1.371398  | -2.469795 |
| C | 6.495333  | -0.719784 | -1.229660 | C | -3.745050 | 0.691790  | -1.245780 |
| C | 1.641190  | -0.673682 | 3.090739  | C | -3.745049 | -0.733150 | -1.221897 |
| C | 2.996512  | -1.117982 | 3.357910  | C | -3.745009 | -1.425121 | 0.024008  |
| C | 5.658471  | -1.461397 | -2.154556 | C | -3.744969 | -0.691786 | 1.246024  |
| C | 6.496359  | 1.425003  | -0.008857 | C | -3.744969 | 0.733154  | 1.222141  |
| C | 6.496024  | 0.746143  | 1.213549  | C | -3.745009 | 1.425125  | -0.023764 |
| C | 5.140711  | -2.624430 | -1.457194 | C | -5.592640 | 2.859817  | -3.351053 |
| C | 5.658280  | -2.601253 | -0.101192 | C | -6.542596 | 3.844138  | -3.123353 |
| C | 3.495226  | -2.260142 | 2.724863  | C | -6.542556 | 4.565138  | -1.922128 |
| C | 4.851471  | -2.269112 | 2.207733  | C | -5.592561 | 4.303359  | -0.946401 |
|   |           |           |           | C | -1.897622 | -1.471961 | -4.152510 |

|   |           |           |           |
|---|-----------|-----------|-----------|
| C | -0.947682 | -0.782542 | -4.891110 |
| C | -0.947682 | 0.618193  | -4.914587 |
| C | -1.897622 | 1.331977  | -4.199505 |
| C | -5.592561 | -4.332658 | -0.801657 |
| C | -6.542556 | -4.626987 | -1.768063 |
| C | -6.542596 | -3.946648 | -2.992775 |
| C | -5.592640 | -2.970510 | -3.253333 |
| C | -1.897379 | -2.859813 | 3.351297  |
| C | -0.947423 | -3.844134 | 3.123597  |
| C | -0.947462 | -4.565134 | 1.922372  |
| C | -1.897458 | -4.303355 | 0.946645  |
| C | -5.592396 | 1.471965  | 4.152754  |
| C | -6.542336 | 0.782546  | 4.891354  |
| C | -6.542336 | -0.618189 | 4.914831  |
| C | -5.592396 | -1.331973 | 4.199749  |
| C | -1.897458 | 4.332662  | 0.801901  |
| C | -0.947462 | 4.626991  | 1.768307  |
| C | -0.947423 | 3.946652  | 2.993020  |
| C | -1.897379 | 2.970514  | 3.253577  |
| H | -5.749332 | 2.214103  | -4.213580 |
| H | -7.338349 | 3.993475  | -3.848637 |
| H | -7.338278 | 5.275425  | -1.712746 |
| H | -5.749193 | 4.760663  | 0.029193  |
| H | -1.740955 | -2.541841 | -4.024653 |
| H | -0.151969 | -1.336026 | -5.383062 |
| H | -0.151969 | 1.154880  | -5.424811 |
| H | -1.740955 | 2.405540  | -4.107574 |
| H | -5.749193 | -4.757011 | 0.188715  |
| H | -7.338278 | -5.329859 | -1.534996 |
| H | -7.338348 | -4.120206 | -3.712647 |
| H | -5.749332 | -2.354063 | -4.137015 |
| H | -1.740686 | -2.214099 | 4.213824  |
| H | -0.151670 | -3.993471 | 3.848881  |
| H | -0.151740 | -5.275421 | 1.712990  |
| H | -1.740826 | -4.760659 | -0.028949 |
| H | -5.749064 | 2.541845  | 4.024897  |
| H | -7.338049 | 1.336030  | 5.383306  |
| H | -7.338049 | -1.154876 | 5.425055  |
| H | -5.749064 | -2.405536 | 4.107818  |
| H | -1.740826 | 4.757015  | -0.188471 |
| H | -0.151740 | 5.329863  | 1.535240  |
| H | -0.151670 | 4.120210  | 3.712891  |
| H | -1.740686 | 2.354067  | 4.137259  |
